# Supplementary material for: Whole-genome resequencing reveals world-wide ancestry and adaptive introgression events of domesticated cattle in East Asia
Source: PubMed Central journal article supplement (PMC6002414; doi:10.1038/s41467-018-04737-0), 2018-06-14
Supplement: 41467_2018_4737_MOESM1_ESM.pdf [file 41467_2018_4737_MOESM1_ESM.pdf]

**Whole-genome resequencing reveals world-wide ancestry and multiple adaptive  
introgression events of domesticated cattle in East Asia**

**Chen *et al.***

**Supplementary Information**

| <b>Supplementary Figures</b> | <b>Page</b> |
|------------------------------|-------------|
| Supplementary Figure 1       | 3           |
| Supplementary Figure 2       | 4           |
| Supplementary Figure 3       | 5           |
| Supplementary Figure 4       | 6           |
| Supplementary Figure 5       | 7           |
| Supplementary Figure 6       | 8           |
| Supplementary Figure 7       | 9           |
| Supplementary Figure 8       | 10          |
| Supplementary Figure 9       | 11          |
| Supplementary Figure 10      | 12          |
| Supplementary Figure 11      | 13          |
| Supplementary Figure 12      | 14          |
| Supplementary Figure 13      | 15          |
| Supplementary Figure 14      | 16          |
| Supplementary Figure 15      | 17-22       |
| Supplementary Figure 16      | 23          |
| Supplementary Figure 17      | 24-29       |
| Supplementary Figure 18      | 30          |
| Supplementary Figure 19      | 31          |
| Supplementary Figure 20      | 32          |
| Supplementary Figure 21      | 33          |
| Supplementary Figure 22      | 34          |
| <br>                         |             |
| <b>Supplementary Tables</b>  |             |
| Supplementary Table 1        | 35-38       |
| Supplementary Table 2        | 39          |
| Supplementary Table 3        | 40          |
| Supplementary Table 4        | 41          |
| Supplementary Table 5        | 42          |
| Supplementary Table 6        | 43          |
| Supplementary Table 7        | 44          |
| Supplementary Table 8        | 45-47       |
| Supplementary Table 9        | 48          |
| Supplementary Table 10       | 49          |
| Supplementary Table 11       | 50          |
| Supplementary Table 12       | 51          |

|                               |              |
|-------------------------------|--------------|
| <b>Supplementary Table 13</b> | <b>52-53</b> |
| <b>Supplementary Table 14</b> | <b>54</b>    |
| <b>Supplementary Table 15</b> | <b>55</b>    |
| <b>Supplementary Table 16</b> | <b>56</b>    |
| <b>Supplementary Table 17</b> | <b>57</b>    |
| <b>Supplementary Table 18</b> | <b>58</b>    |
| <b>Supplementary Table 19</b> | <b>59</b>    |
| <b>Supplementary Table 20</b> | <b>60</b>    |
| <b>Supplementary Table 21</b> | <b>61-87</b> |
| <b>Supplementary Table 22</b> | <b>88</b>    |
| <b>Supplementary Table 23</b> | <b>89</b>    |
| <b>Supplementary Table 24</b> | <b>90</b>    |
| <b>Supplementary Table 25</b> | <b>91</b>    |
| <b>Supplementary Table 26</b> | <b>92</b>    |
| <b>Supplementary Table 27</b> | <b>93</b>    |
| <b>Supplementary Table 28</b> | <b>121</b>   |
| <b>Supplementary Table 29</b> | <b>122</b>   |
| <b>Supplementary Table 30</b> | <b>123</b>   |

### **Supplementary Notes**

|                             |            |
|-----------------------------|------------|
| <b>Supplementary Note 1</b> | <b>124</b> |
| <b>Supplementary Note 2</b> | <b>125</b> |
| <b>Supplementary Note 3</b> | <b>127</b> |
| <b>Supplementary Note 4</b> | <b>128</b> |
| <b>Supplementary Note 5</b> | <b>130</b> |
| <b>Supplementary Note 6</b> | <b>134</b> |

|                                |            |
|--------------------------------|------------|
| <b>Supplementary Reference</b> | <b>135</b> |
|--------------------------------|------------|

## Supplementary Figures

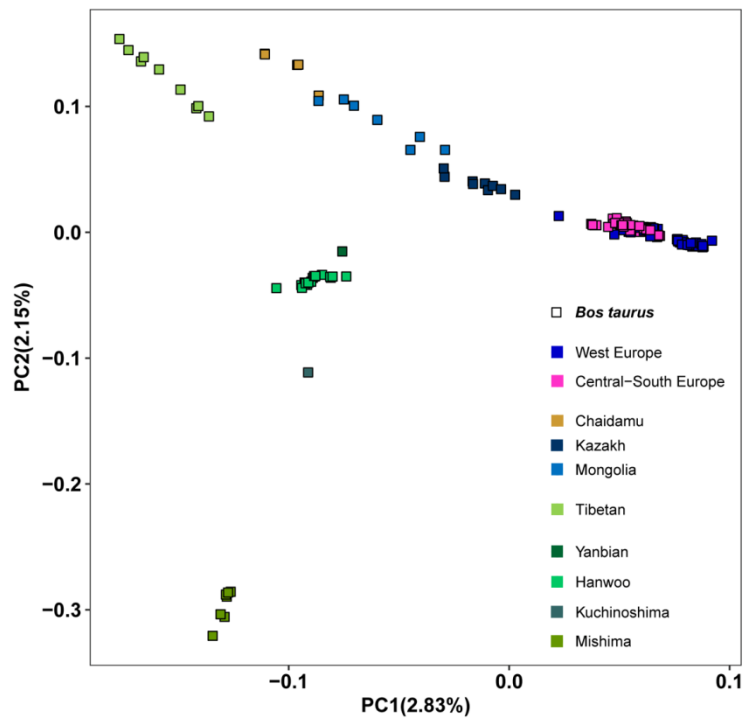

**Supplementary Figure 1. Principal component analysis (PCA) of taurine cattle, with PC1 plotted against PC2. In total, 142 individuals from 21 taurine cattle breeds were used for the PCA analysis, including six West European breeds (Red Angus, Angus, Devon, Hereford, Holstein, and Jersey), seven Central-South European breeds (Maine Anjou, Salers, Limousin, Charolais, Piedmontese, Gelbvieh, and Simmental), three breeds from Northwest China (Chaidamu, Kazakh, and Mongolian), four East Asian breeds (Hanwoo, Kuchinoshima, Mishima, and Yanbian), and Tibetan cattle. The first component was driven by difference between European and East Asian taurine cattle, and the second component was by a split of Northeast Asian cattle (Hanwoo, Kuchinoshima, Mishima, and Yanbian cattle).**

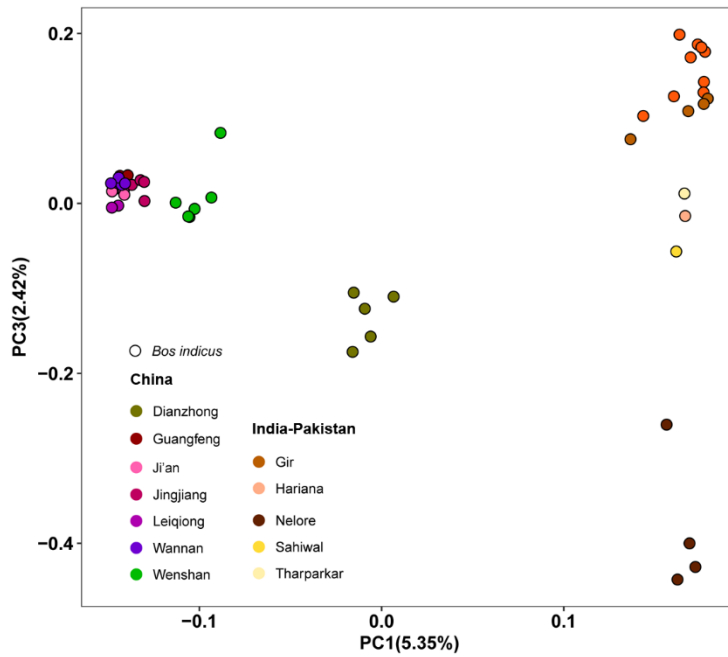

**Supplementary Figure 2. Principal component analysis (PCA) of indicine cattle, with PC1 plotted against PC3. In total, 50 individuals from 13 indicine cattle breeds were used for PCA analysis, including six Indian indicine breeds (Hariana, Sahiwal, Tharparkar, Brahman, Gir, and Nelore) and seven Chinese indicine breeds (Guangfeng, Ji'an, Jingjiang, Leiqiong, Wannan, Dianzhong, and Wenshan). Please note that we excluded the hybrid individuals of two Wenshan and one Dianzhong cattle. The first component was driven by differences between Indian and Chinese indicine cattle, and the second component by a split of different Indian indicine cattle.**

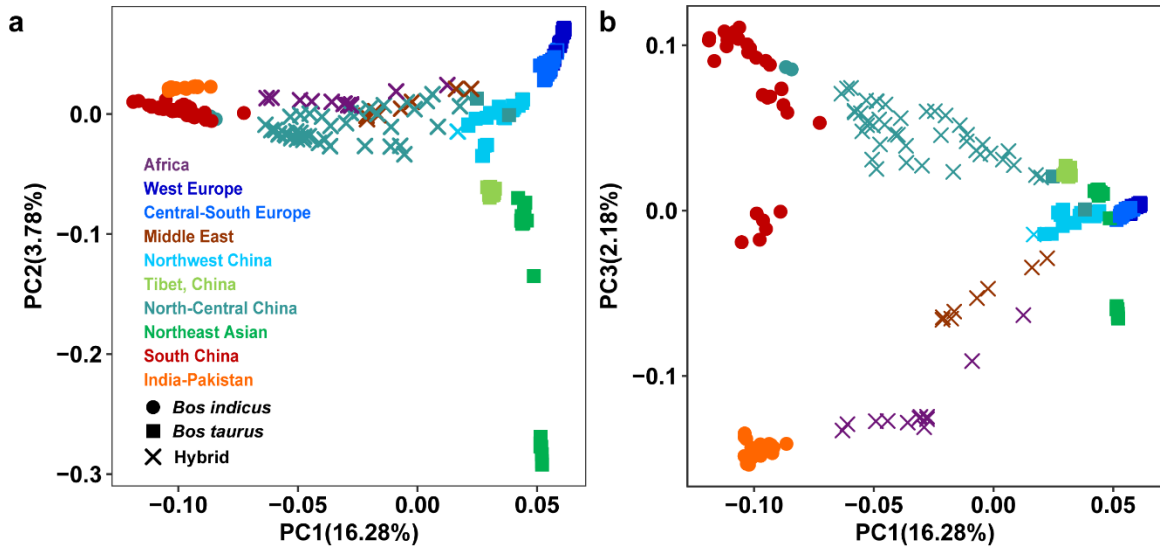

Supplementary Figure 3. Principal component analysis (PCA) showing PC1 against PC2 (a) and PC1 against PC3 (b) by using ANGSD.

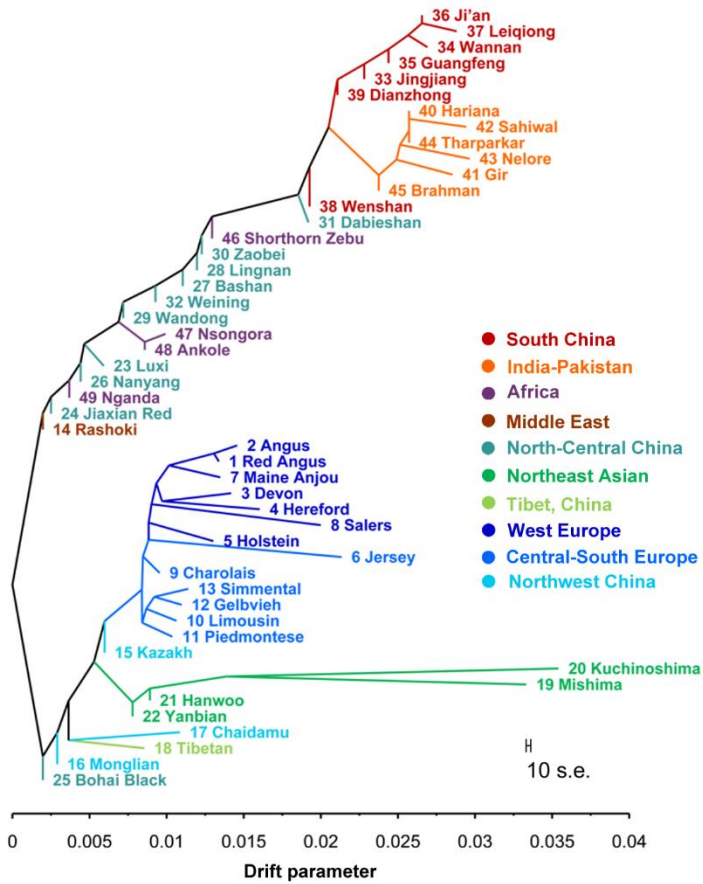

**Supplementary Figure 4. TreeMix relationships between 48 cattle breeds. Breeds 1-13 and 16-22 are taurine origin; 37-44 indicine origin; 14-15, 23-36, and 45-47 hybrid origin. The window size of 1000 was used to account for linkage disequilibrium (-k) and “-global” to generate the ML tree.**

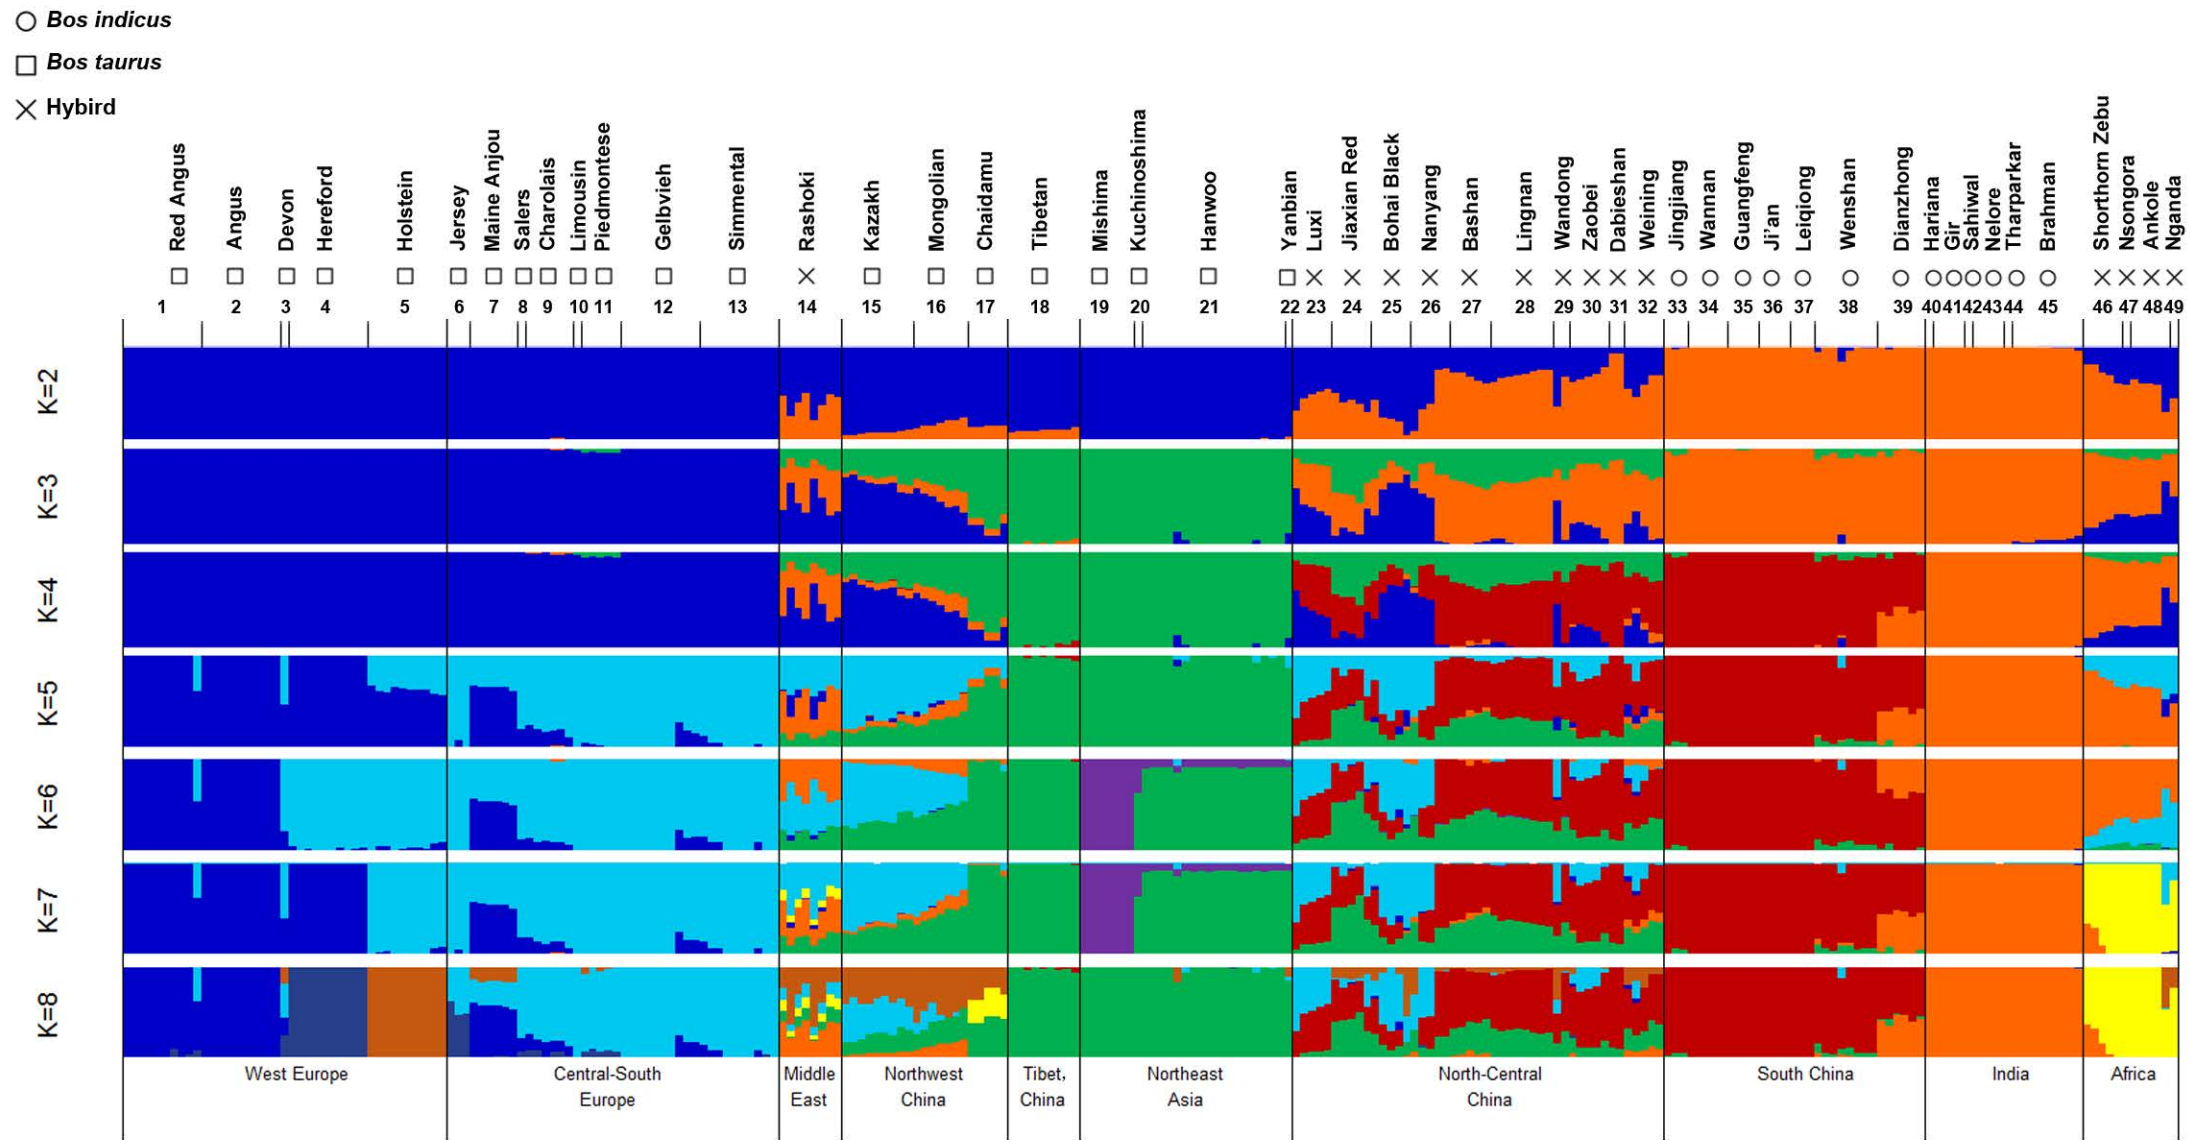

Supplementary Figure 5. Model-based clustering of cattle breeds using the program ADMIXTURE with  $K = 2$  to 8 (plotted in R).

The breed name associated with serial number is listed in the “Figure legend” column in Supplementary Table 2. “□” represent *Bos taurus*, “○” represents *Bos indicus*, “×” represent hybrid between *Bos taurus* and *Bos indicus*. We found strong support for two population subdivisions ( $K = 2$ ), which is consistent with the deep division of the *Bos taurus* and *Bos indicus* lineages. The population subdivision at  $K = 3$  reproduces the second PCA coordinated by separating the European cattle (West Europe and Central-South Europe) from East Asia cattle (Tibetan and Northeast Asian cattle). The Chinese indicine cattle (Leiqiong, Jingjiang, Guangfeng, Ji'an, Wannan, and Wenshan) was clearly separated from the Indian indicine cattle (Haryana, Sahiwal, Tharparkar, Brahman, Gir, and Nelore) at  $K = 4$ . Population subdivisions at  $K = 5$  produced different *Bos taurus* groups and revealed a strong clustering of taurine cattle into three main clusters: European taurine ancestry (Hereford, Holstein, and Angus), Eurasian taurine ancestry (Piedmontese, Gelbvieh, Limousin, Simmental, Kazakh, Mongolian, and Chaidamu), and East Asian taurine ancestry (Tibetan, Mishima, Kuchinoshima, Hanwoo, and Yanbian).

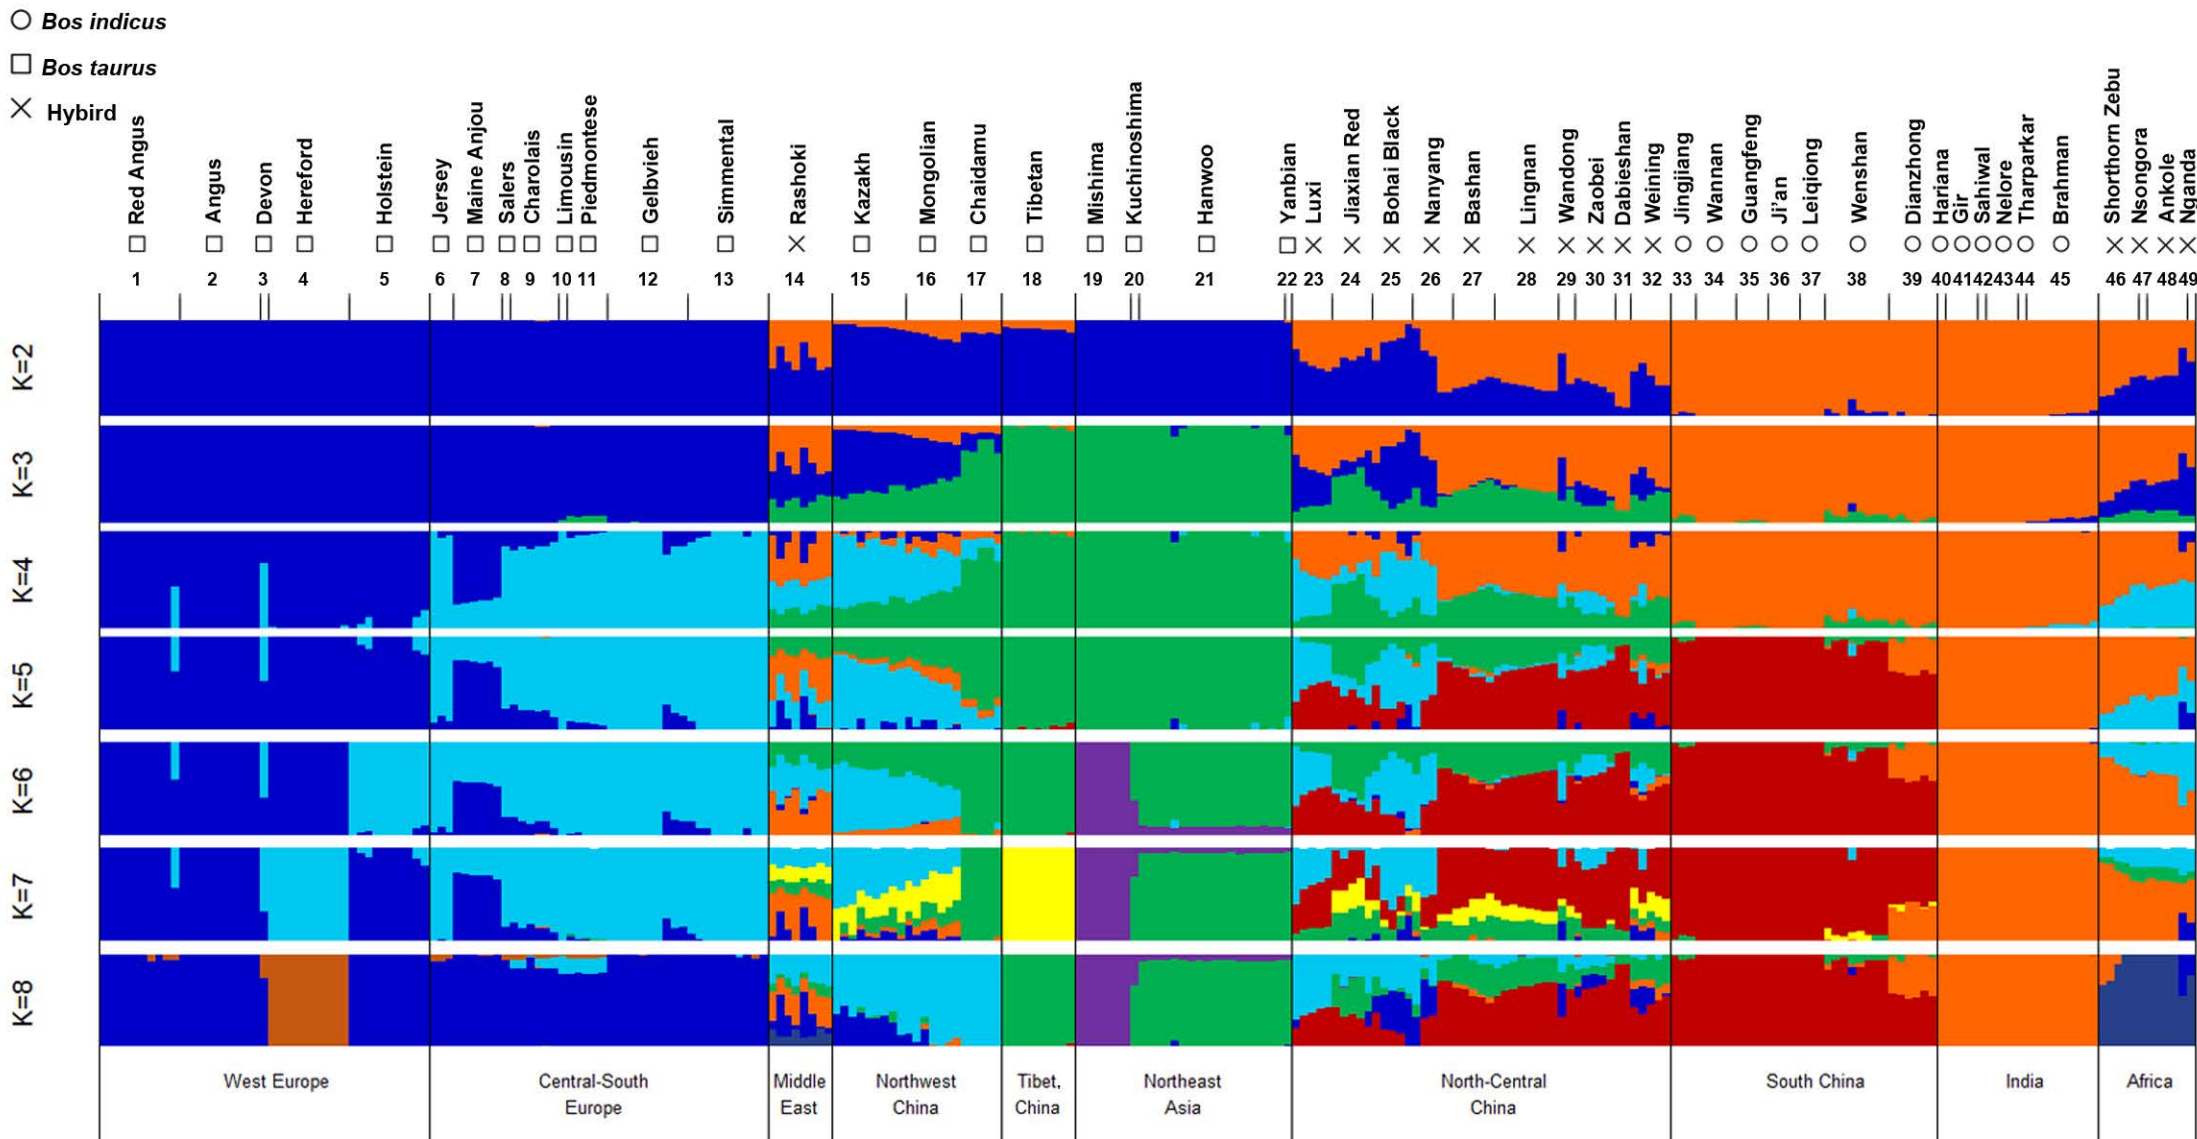

**Supplementary Figure 6. Model-based clustering of cattle breeds using the program NGSadmix with  $K = 2$  to 8 (plotted in R).**

The breed name associated with earial number is listed in the “Figure legend” column in Supplementary Table 2. “□” represent *Bos taurus*, “○” represents *Bos indicus*, “×” represent hybrid between *Bos taurus* and *Bos indicus*. We found strong support for two population subdivisions ( $K = 2$ ), which is consistent with the deep division of the *Bos taurus* and *Bos indicus* lineages. The population subdivision at  $K = 3$  reproduces the second PCA coordinated by separating the European cattle (West Europe and Central-South Europe) from East Asia cattle (Tibetan and Northeast Asian cattle). Population subdivisions at  $K = 4$  produced different *Bos taurus* groups and revealed a strong clustering of taurine cattle into three main clusters: European taurine ancestry (Hereford, Holstein, and Angus), Eurasian taurine ancestry (Piedmontese, Gelbvieh, Limousin, Simmental, Kazakh, Mongolian, and Chaidamu), and East Asian taurine ancestry (Tibetan, Mishima, Kuchinoshima, Hanwoo, and Yanbian). The Chinese indicine cattle (Leiqiong, Jingjiang, Guangfeng, Ji'an, Wannan, and Wenshan) was clearly separated from the Indian indicine (Haryana, Sahiwal, Tharparkar, Brahman, Gir, and Nelore) at  $K = 5$ .





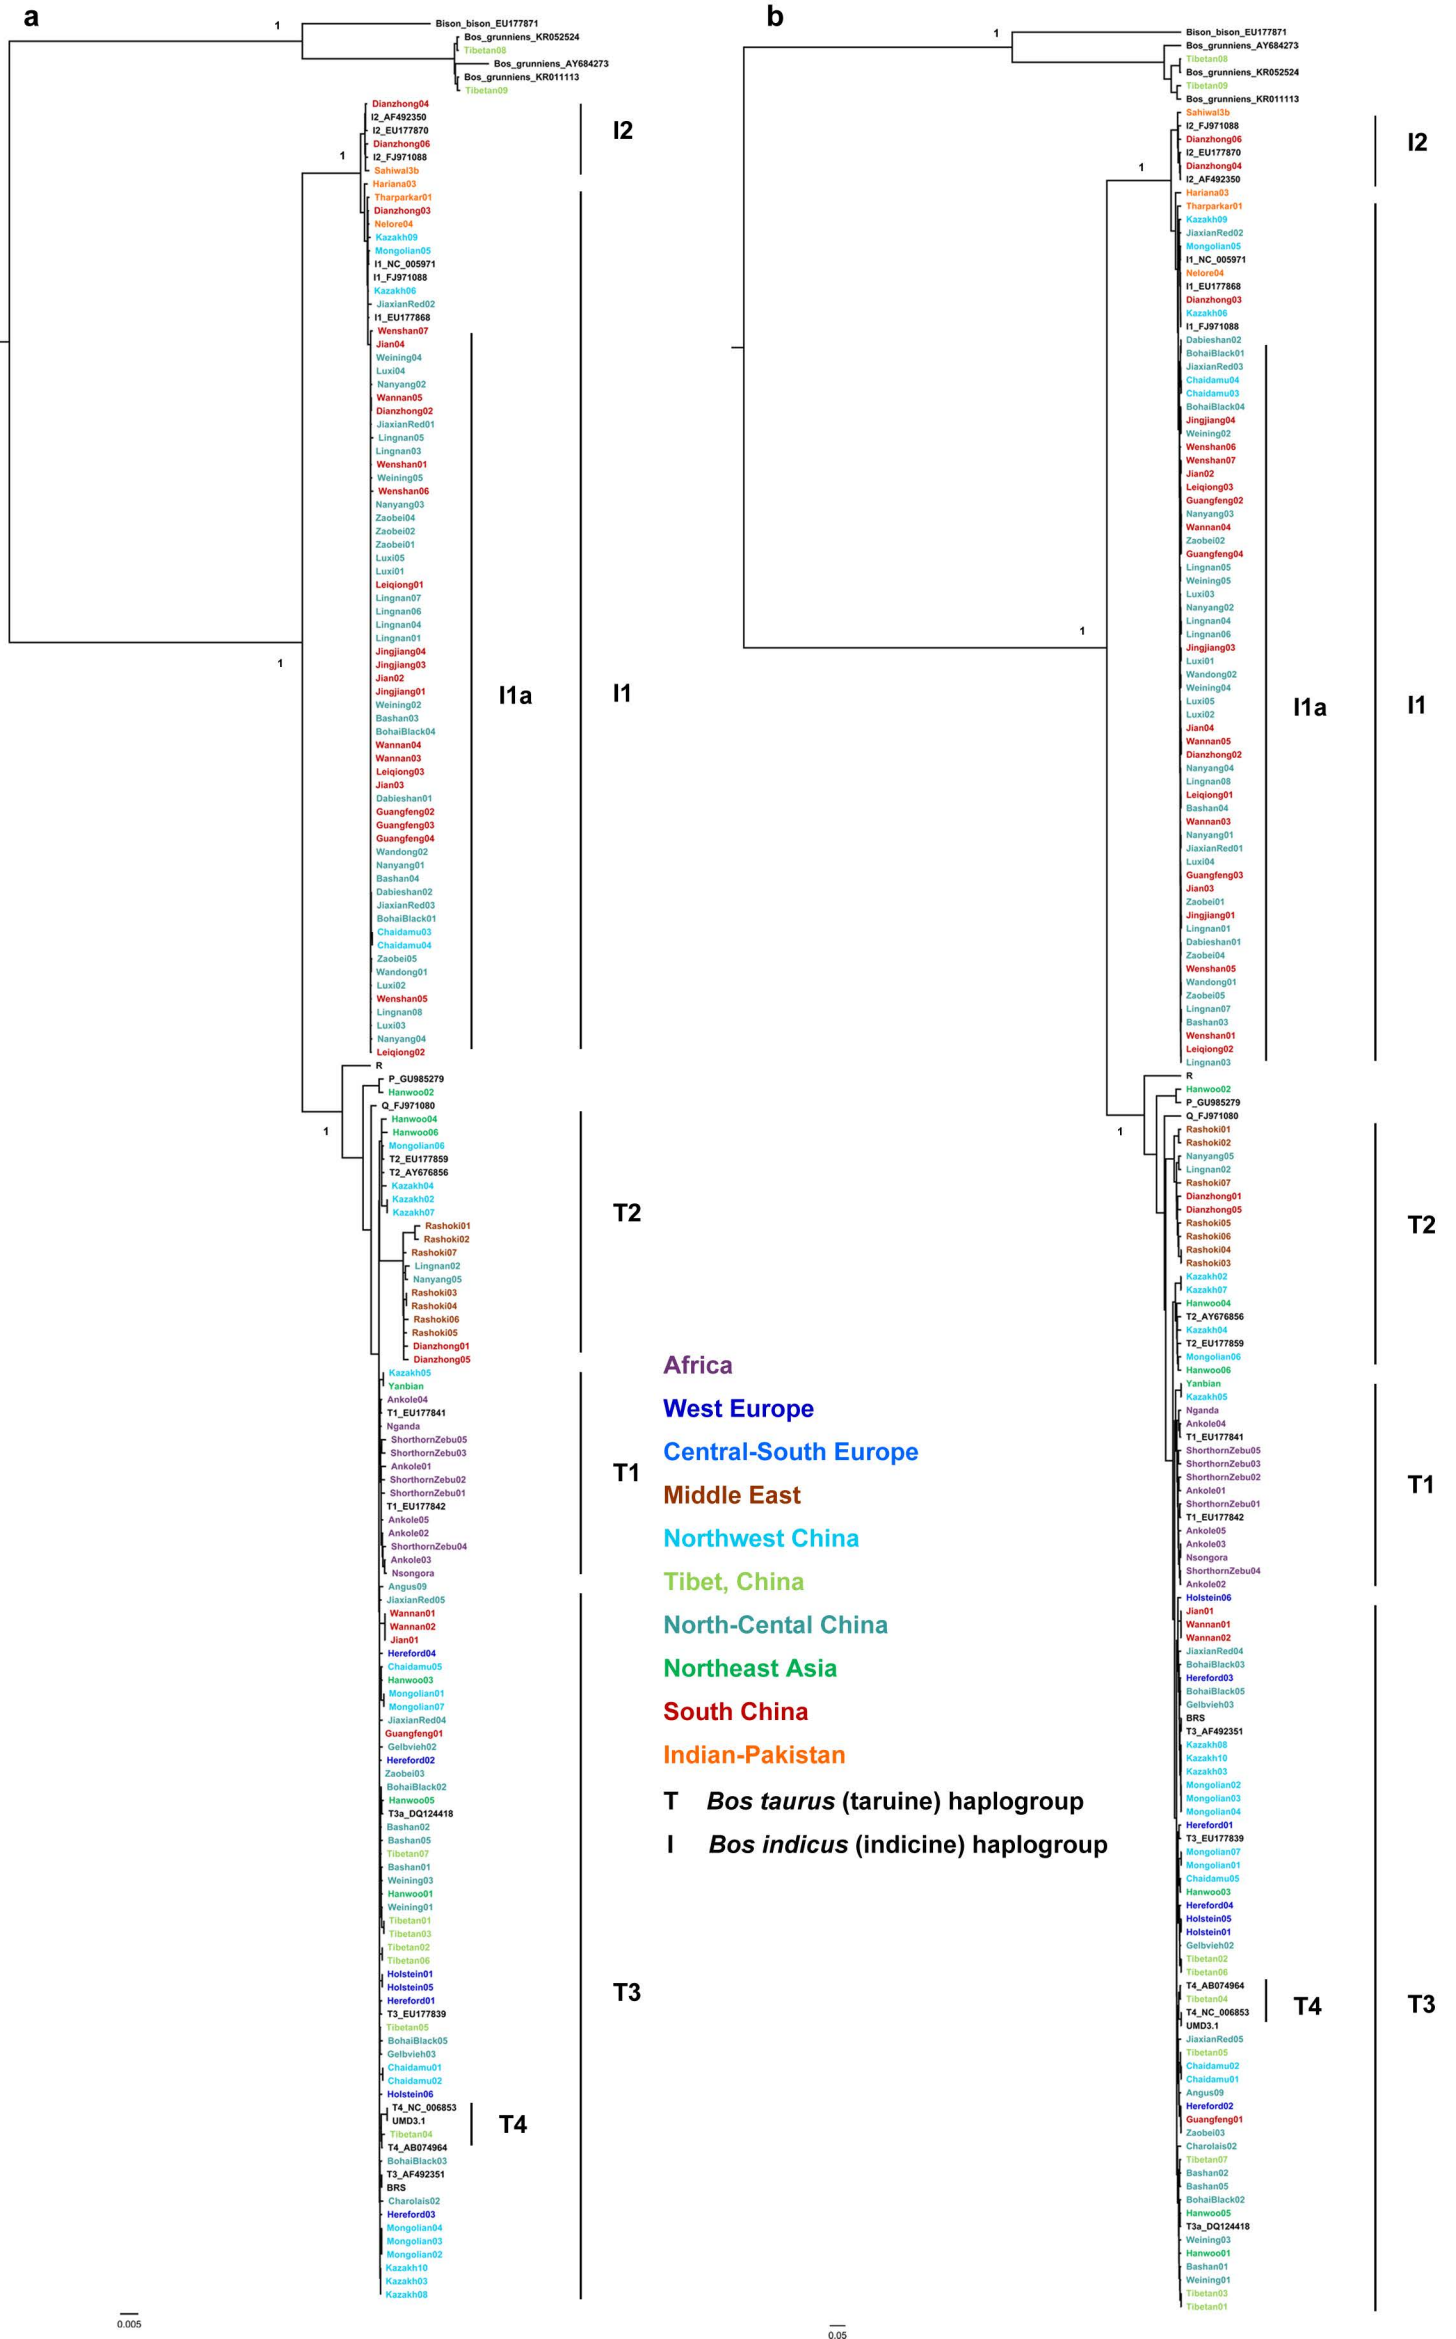

Supplementary Figure 8. Phylogenetic trees inferred from whole mitochondrial genomes

Maximum-likelihood tree from PhyML(a) and MCMC tree from Beast (b). Scale bars are based on substitutions per site.

These trees encompass 171 sequences and are rooted using three published yak sequences and a sequence from American bison. The black lines represent published reference sequences. T1,T2,T3, and T4 belong to *Bos taurus*, I1 and I2 belong to *Bos indicus*.

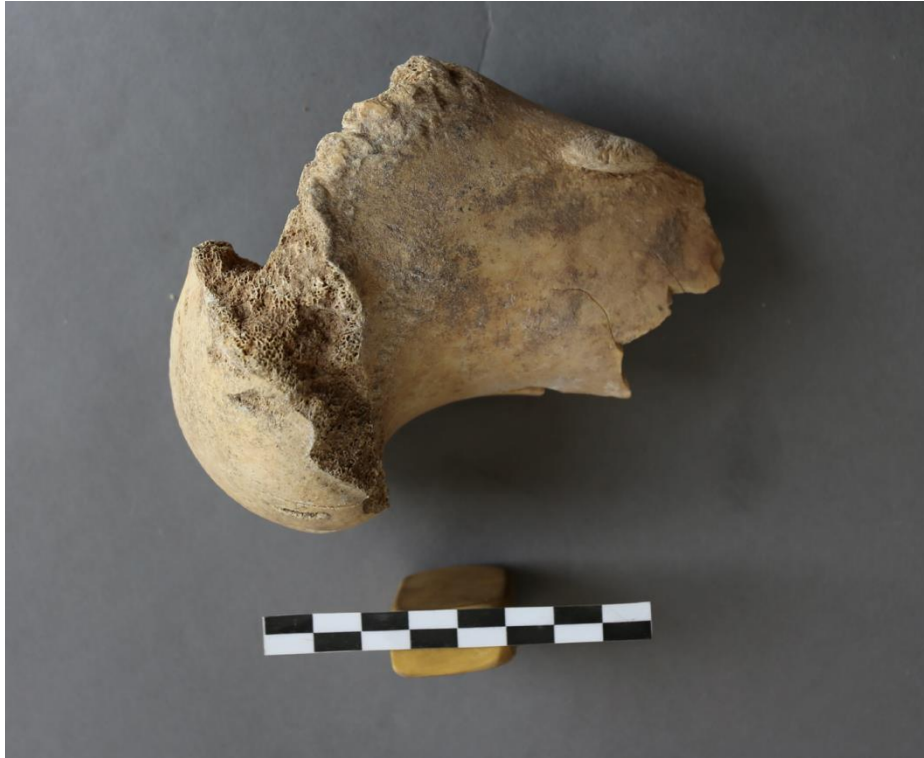

**Supplementary Figure 9. Humerus (right) of the Shimao05 specimen used for direct dating.**

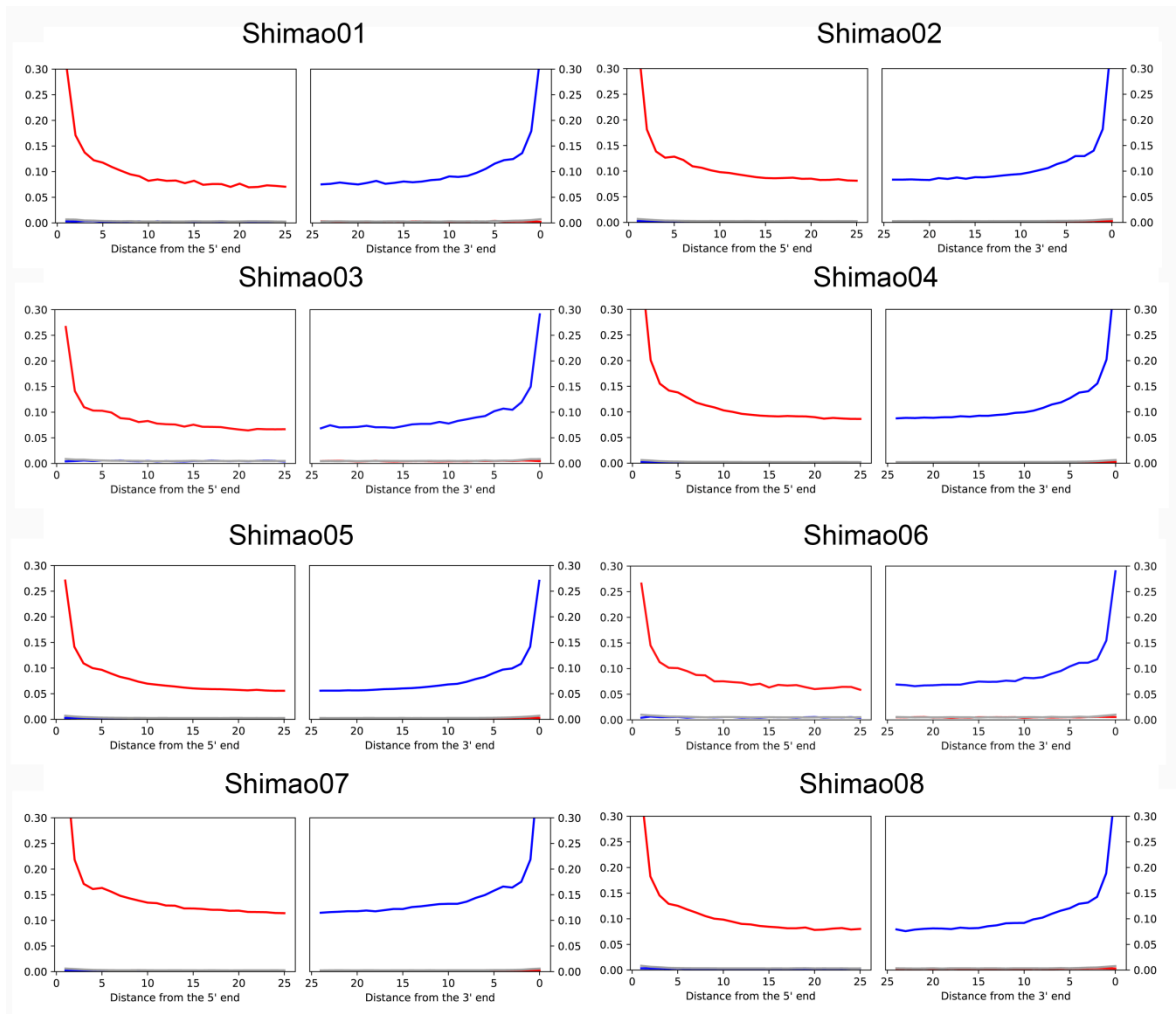

**Supplementary Figure 10. Nucleotide mis-incorporation patterns at 5'- and 3'- read termini for eight ancient samples. Nucleotide mis-incorporation patterns along the first and last 25 read positions obtained for the eight Shimao cattle before trimming and rescaling. All libraries were blunt-ended libraries (New England Biolabs) amplified with AmpliTaq Gold DNA polymerase (Life Technologies). Mis-incorporation frequencies are shown for the first and last 25 nucleotides of the reads aligned to the bovine reference nuclear genome Btau\_5.0.1. The x-axis provides read positions relative to the read starts (positive numbers) and read ends (negative numbers). Red: C to T substitutions; Blue: G to A substitutions; and Grey: All other substitutions.**

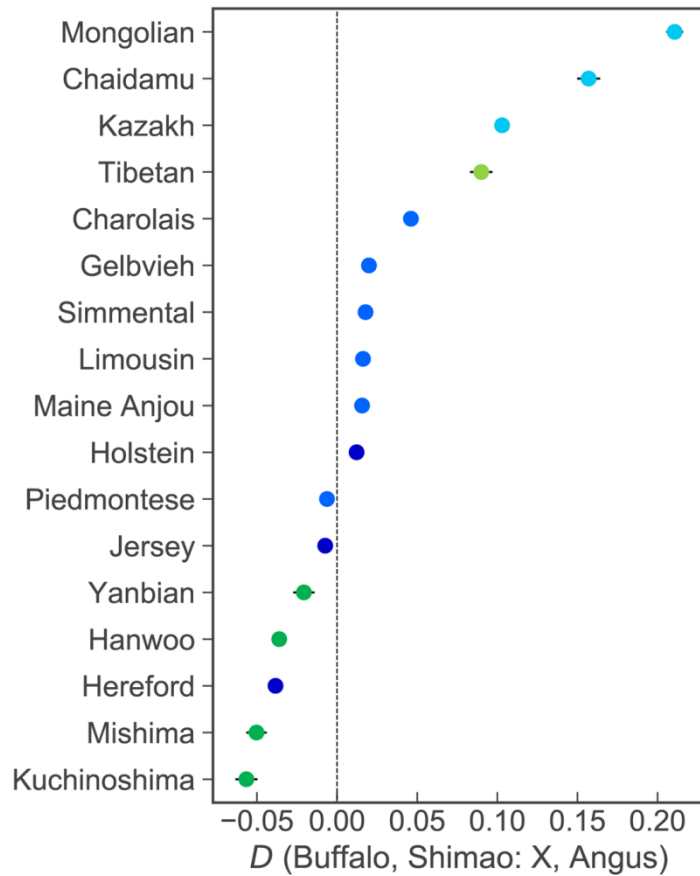

**Supplementary Figure 11. Allele frequency-based  $D$  statistical test of the forms  $D$  (Buffalo, Shimaos; X, Angus), where X represents modern-day *Bos taurus* populations from Europe and East Asia. The  $D$  statistic test is negative for Japanese cattle (Mishima and Kuchinoshima), followed by Hereford, Hanwoo, and Yanbian cattle, which provides evidence of the gene flow between ancient Chinese cattle and the Northeast Asian taurine group. Tibetan cattle were perhaps subjected to a relative stronger drift after the separation which may result in the positive  $D$  scores.**

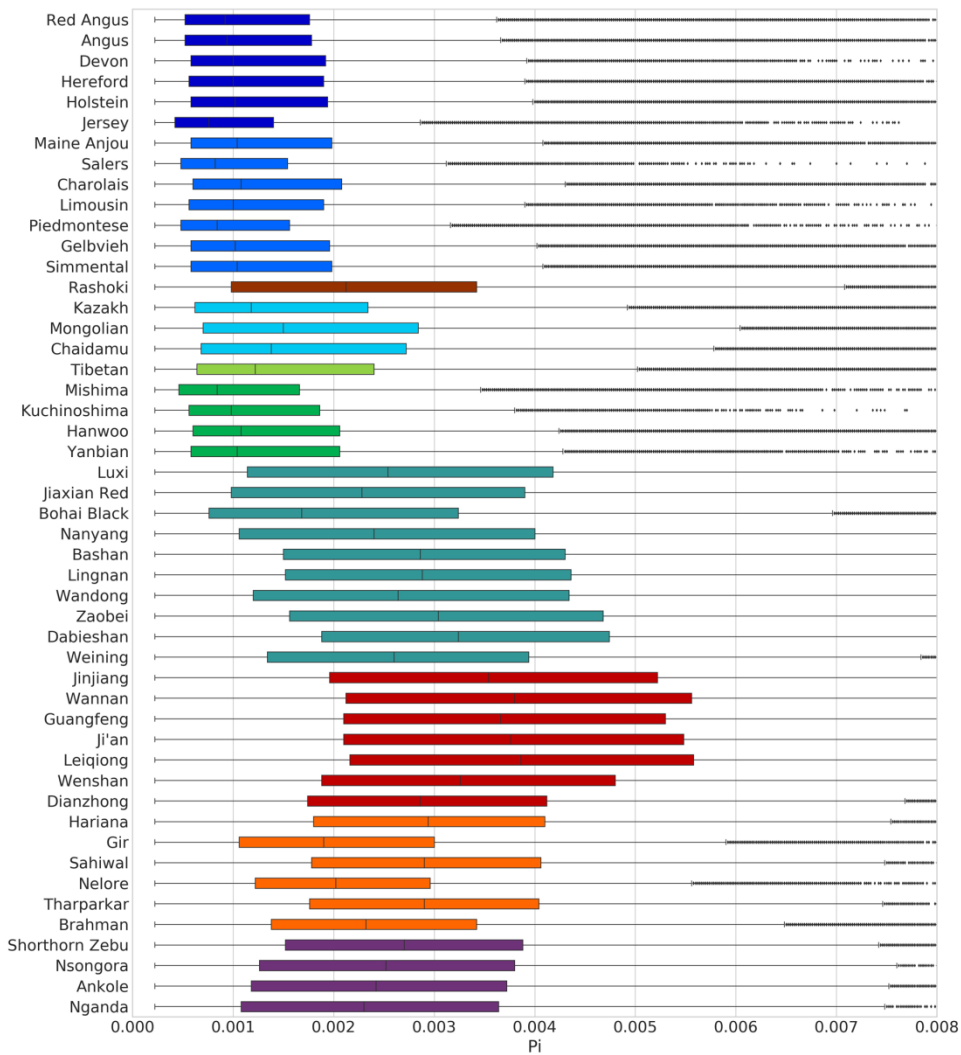

**Supplementary Figure 12. Genome-wide distribution of nucleotide diversity by using VCFtools. The vertical line inside the box corresponds to the median of this distribution, the left and right of the box are the first and third quartiles. Data points outside the whiskers can be considered as outliers.**

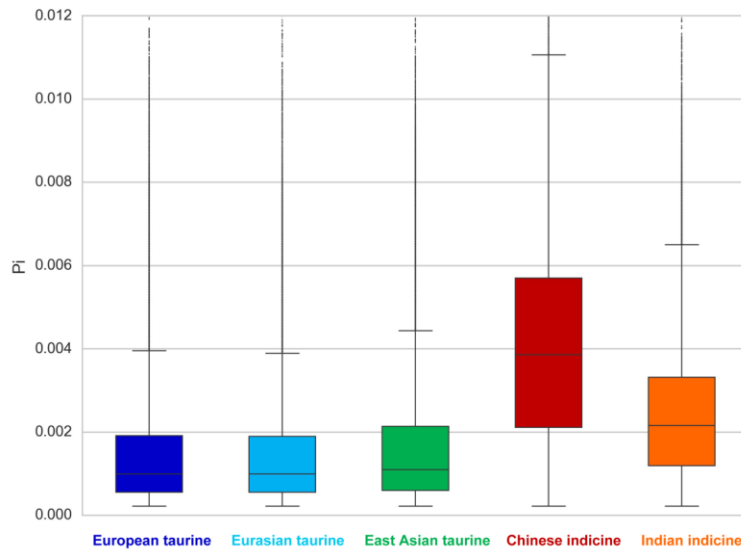

**Supplementary Figure 13. Genome-wide distribution of nucleotide diversity of five core group. Nucleotide diversity of the five groups were repeated by using ANGSD. The horizontal line inside the box corresponds to the median of this distribution, the bottom and top of the box are the first and third quartiles and data points outside the whiskers can be considered as outliers.**

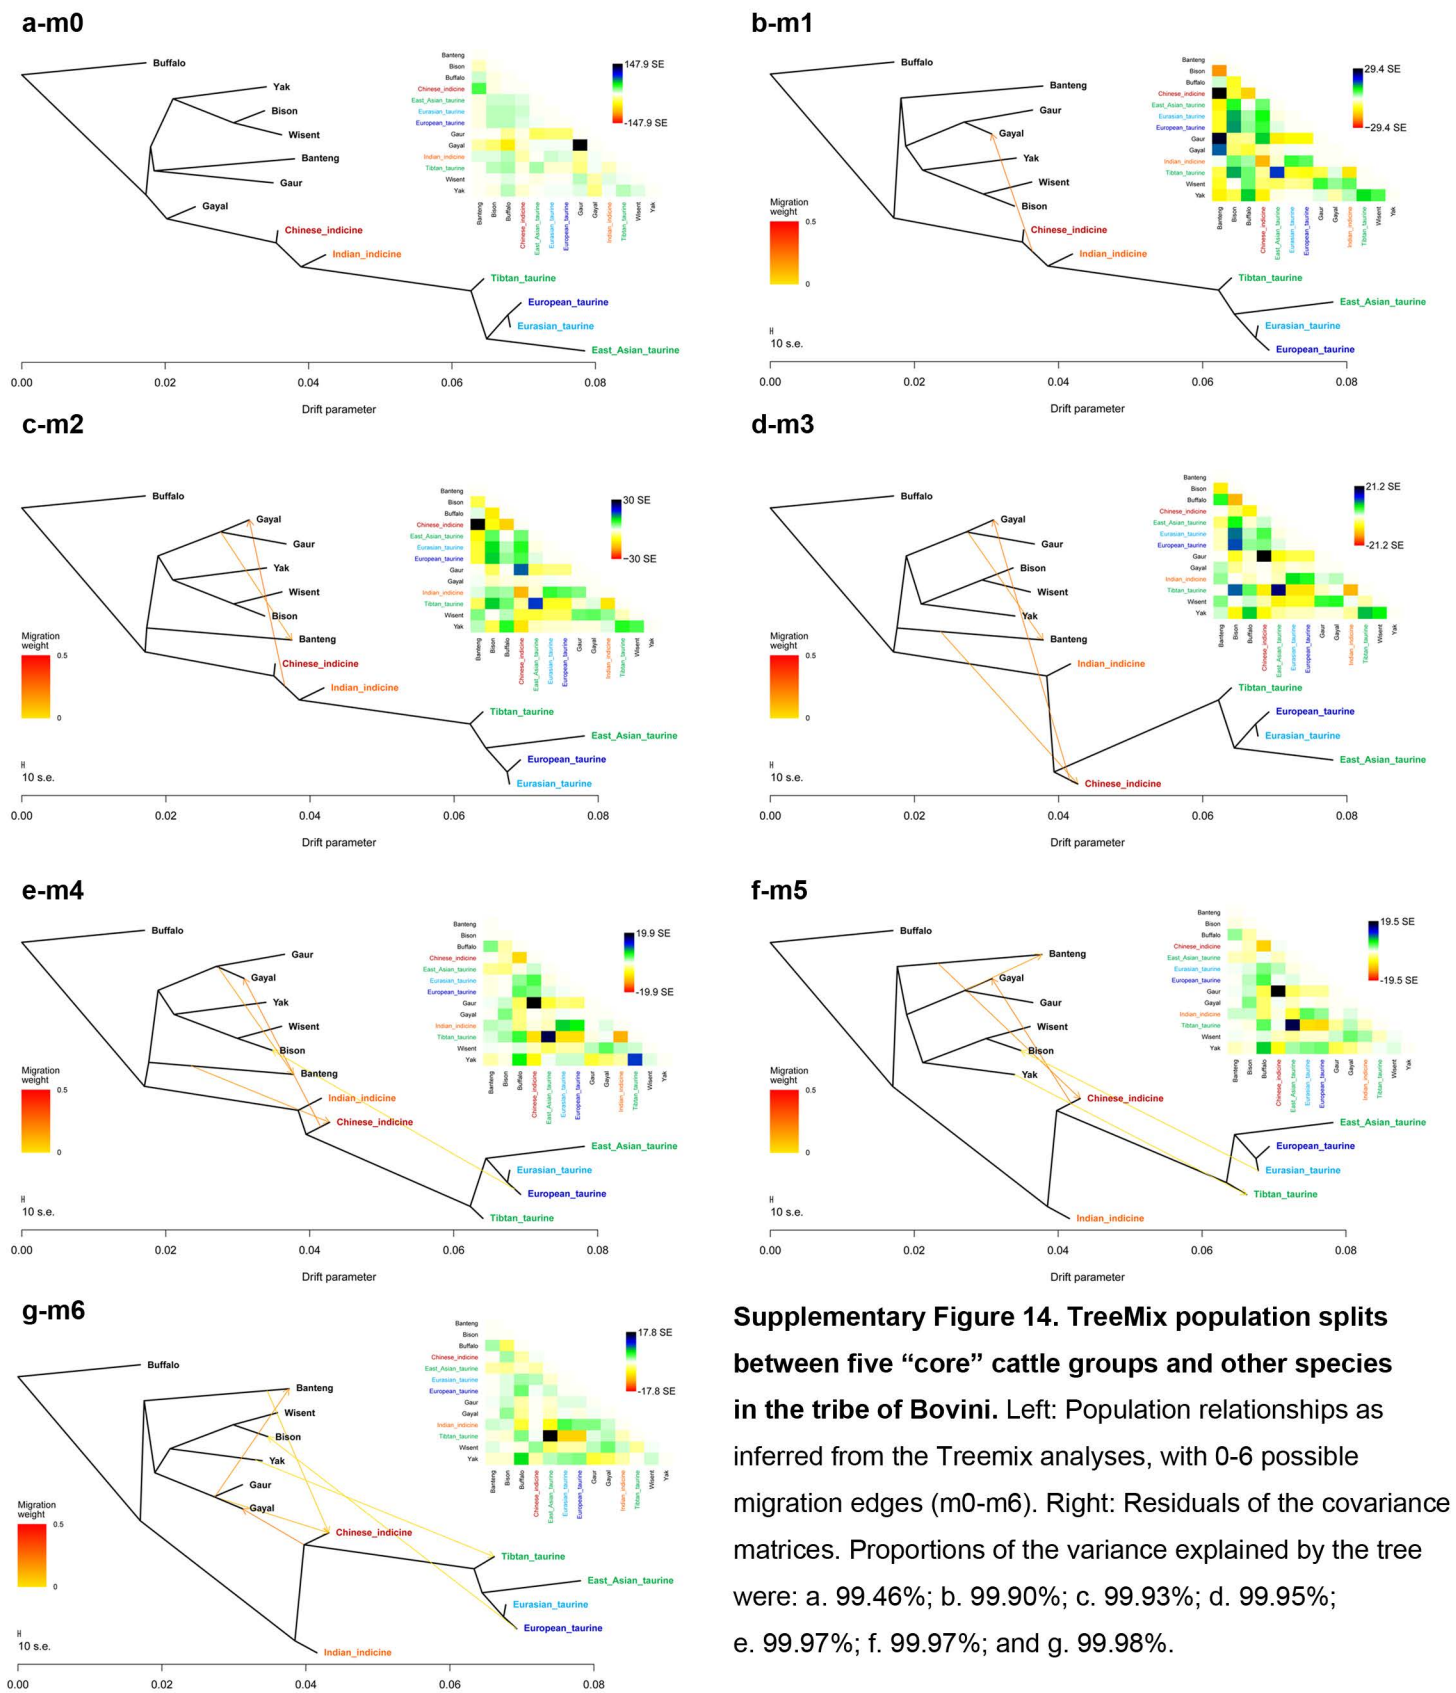



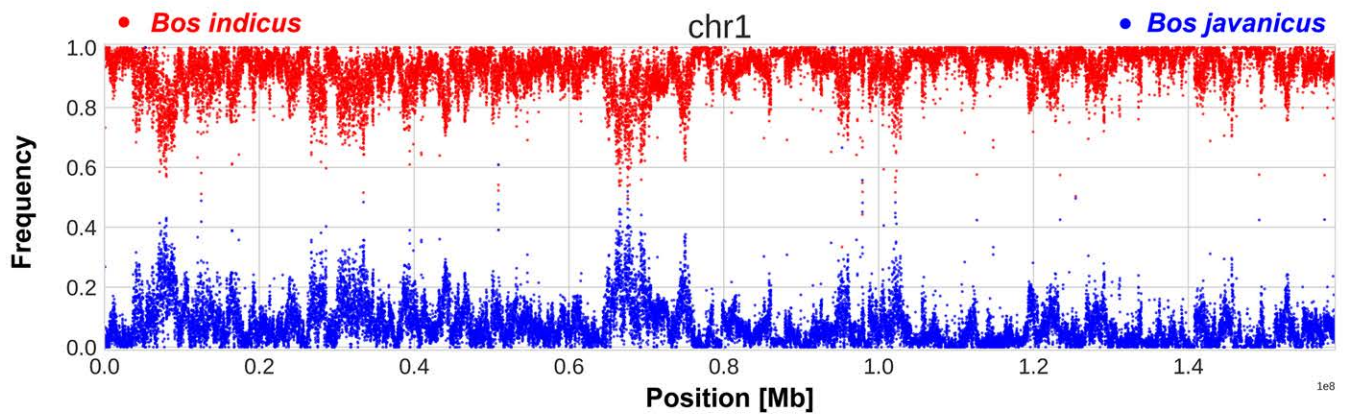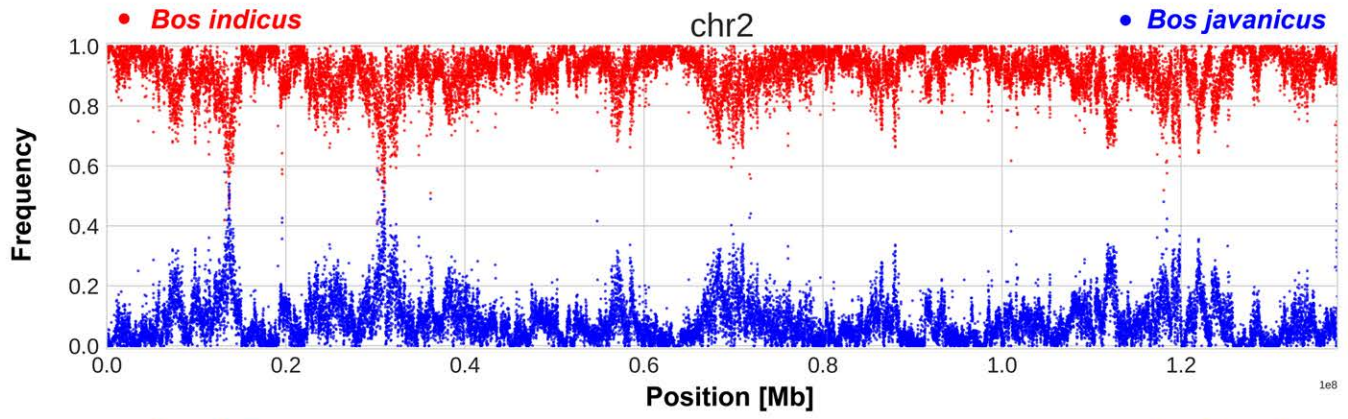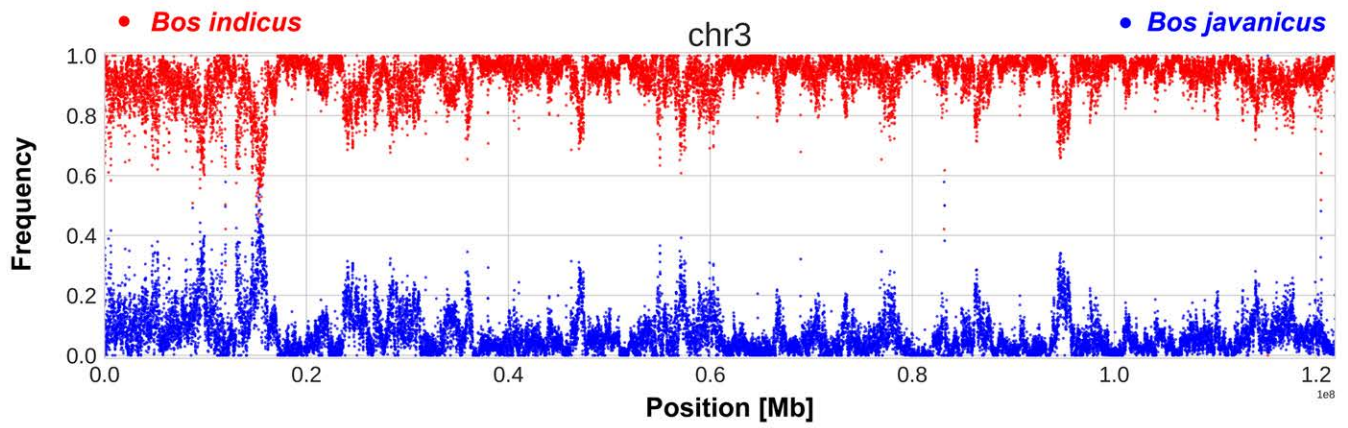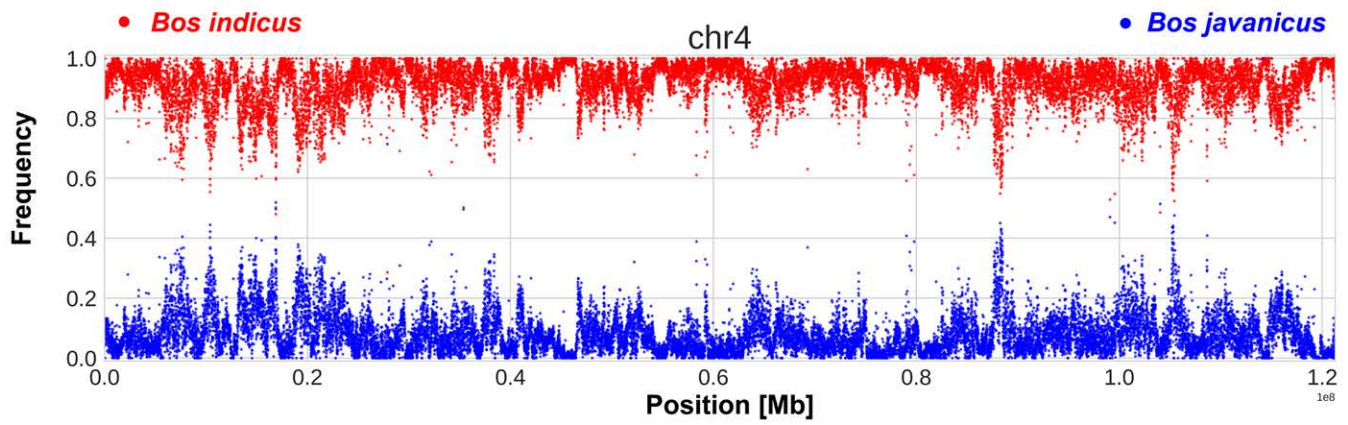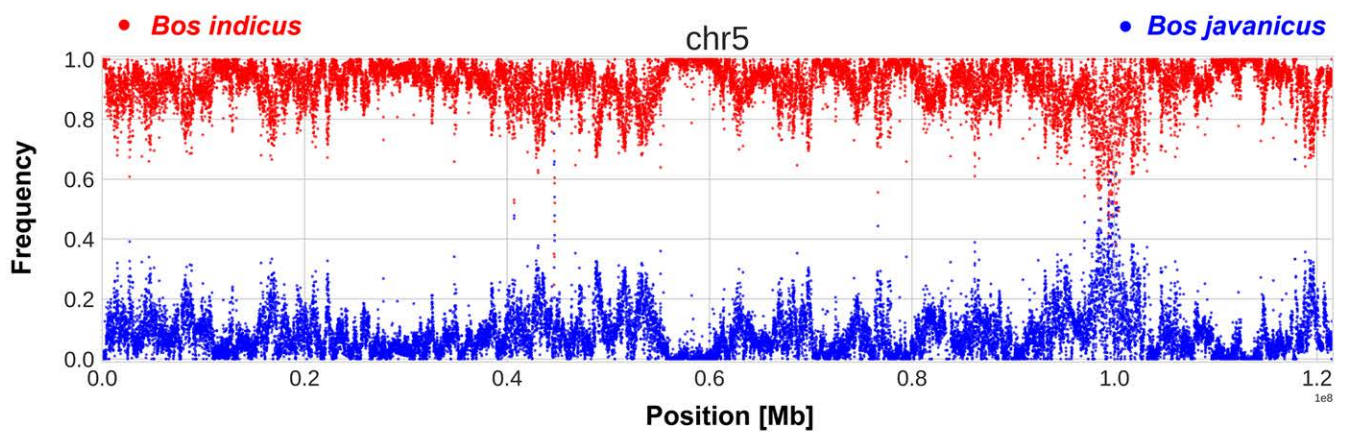

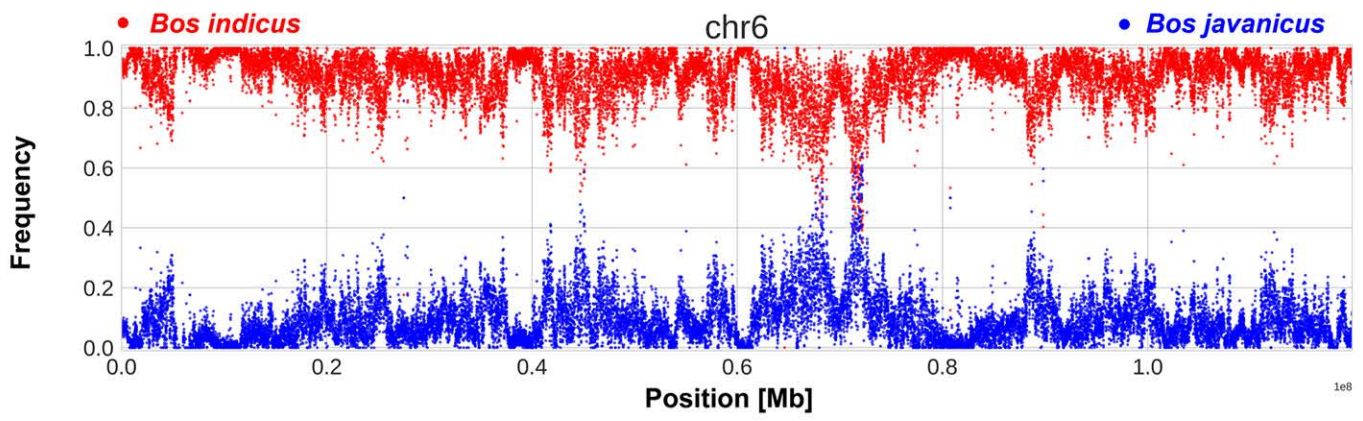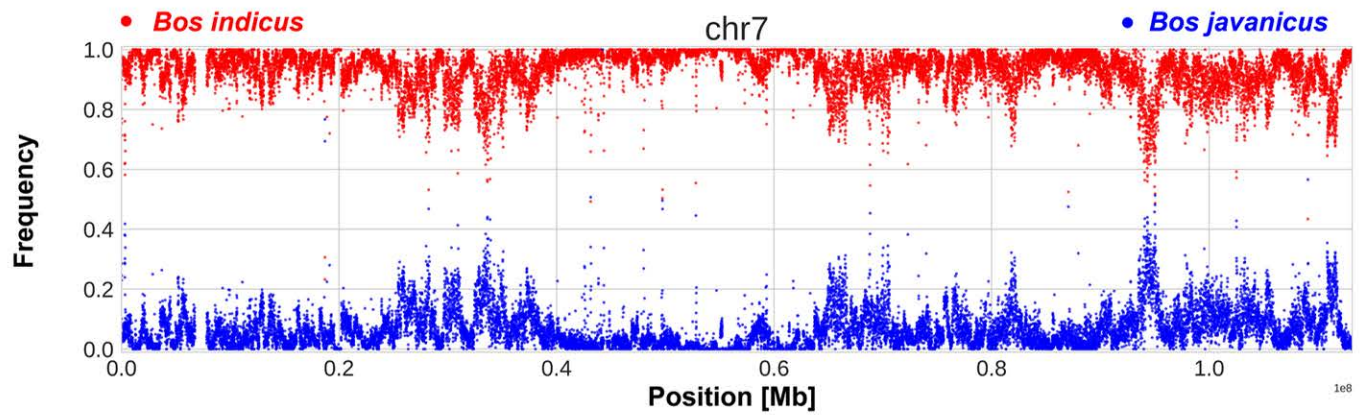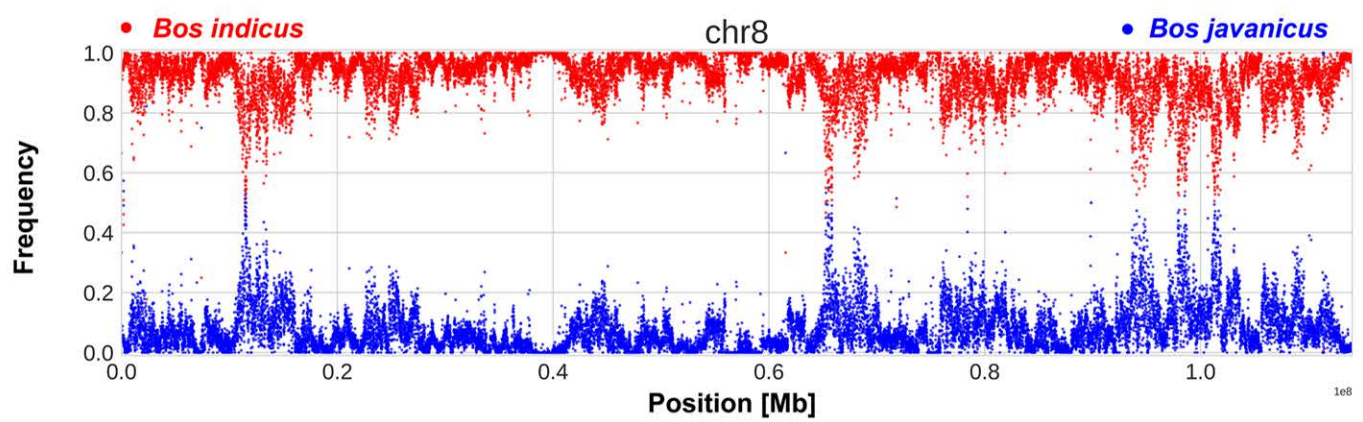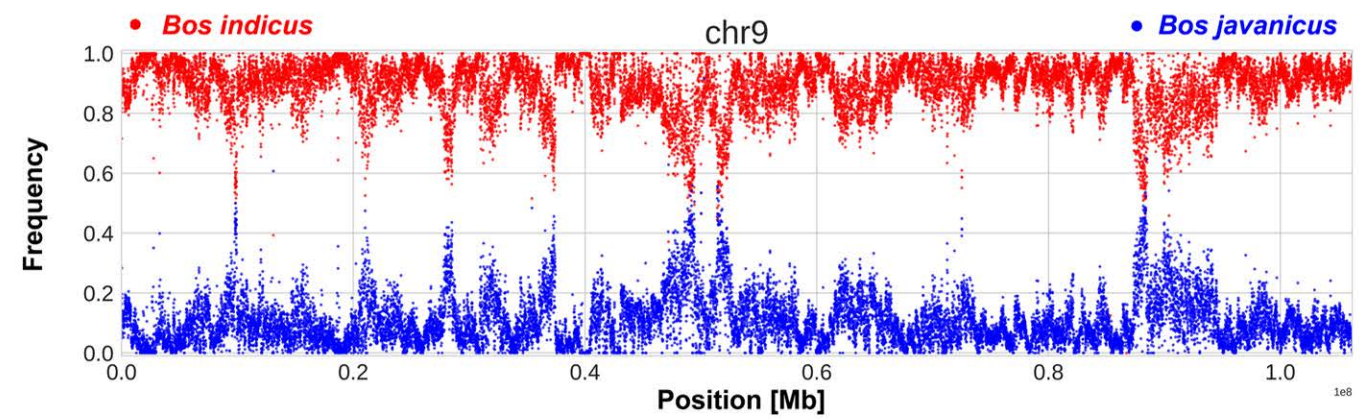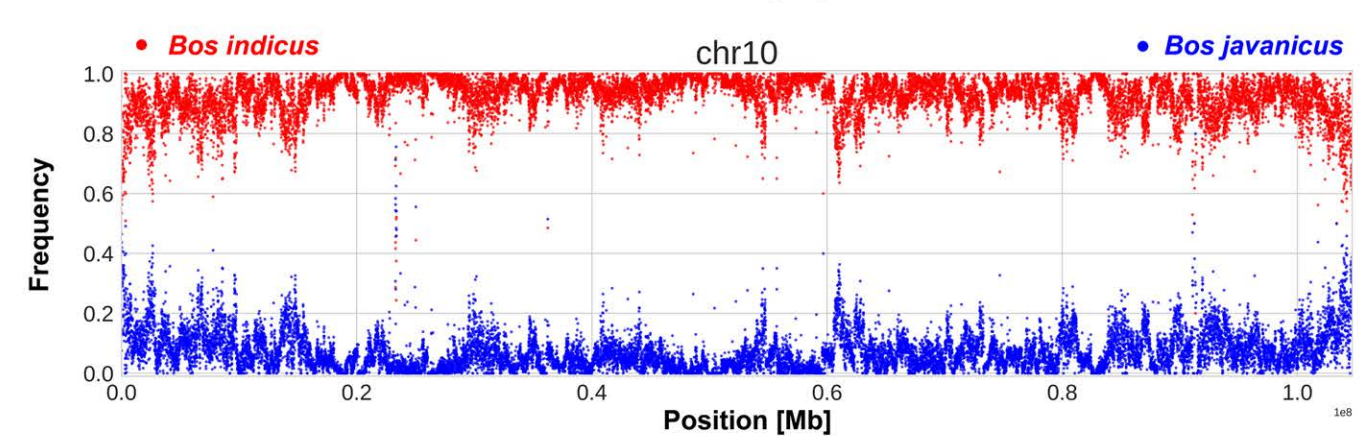

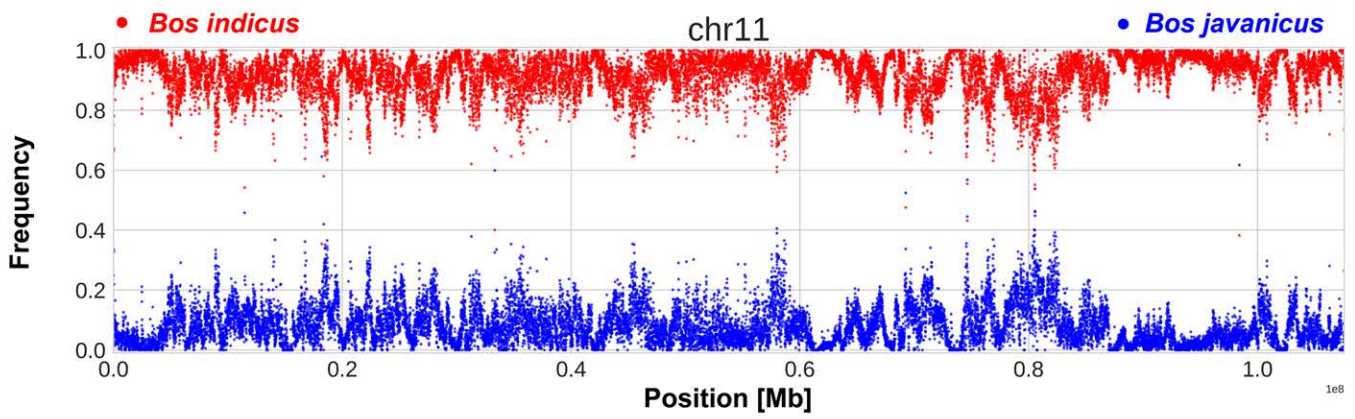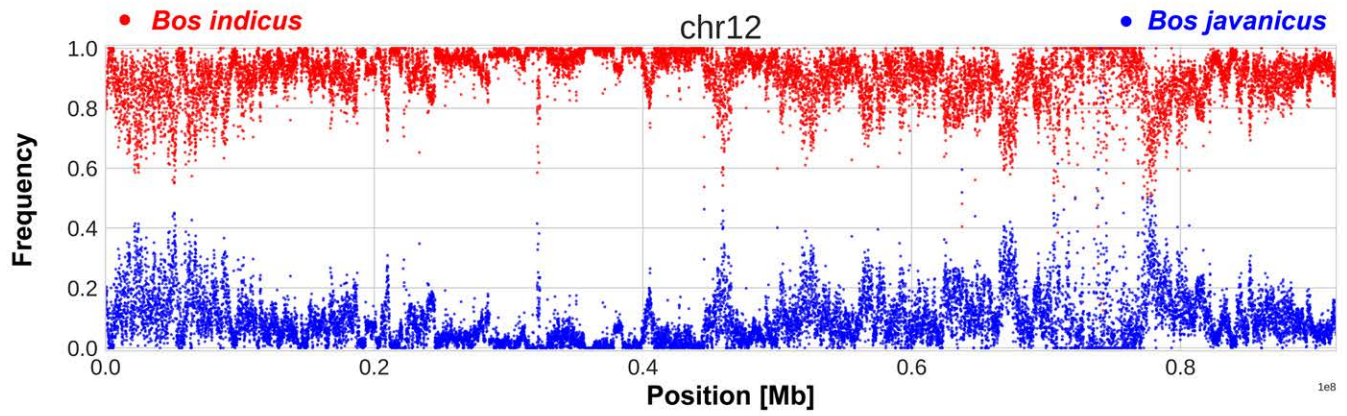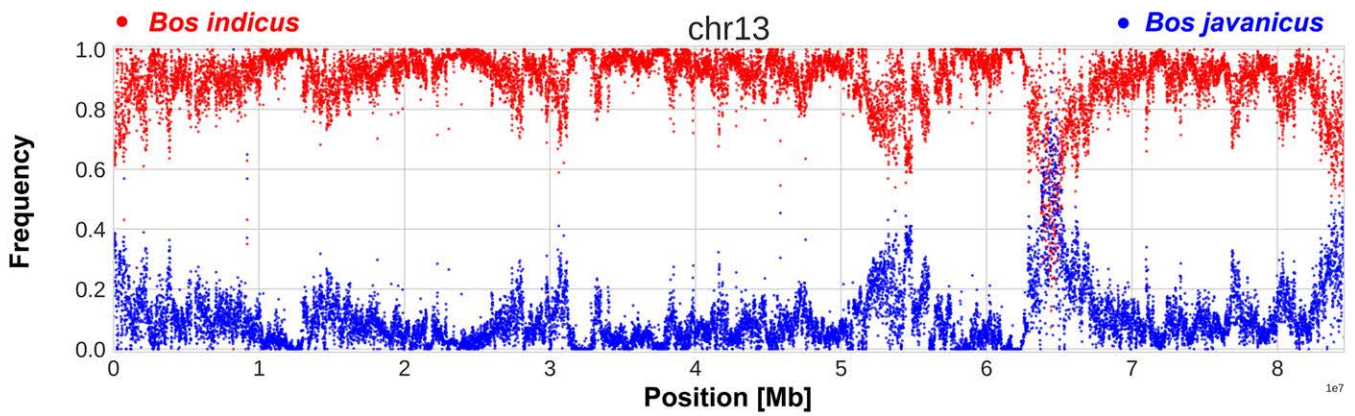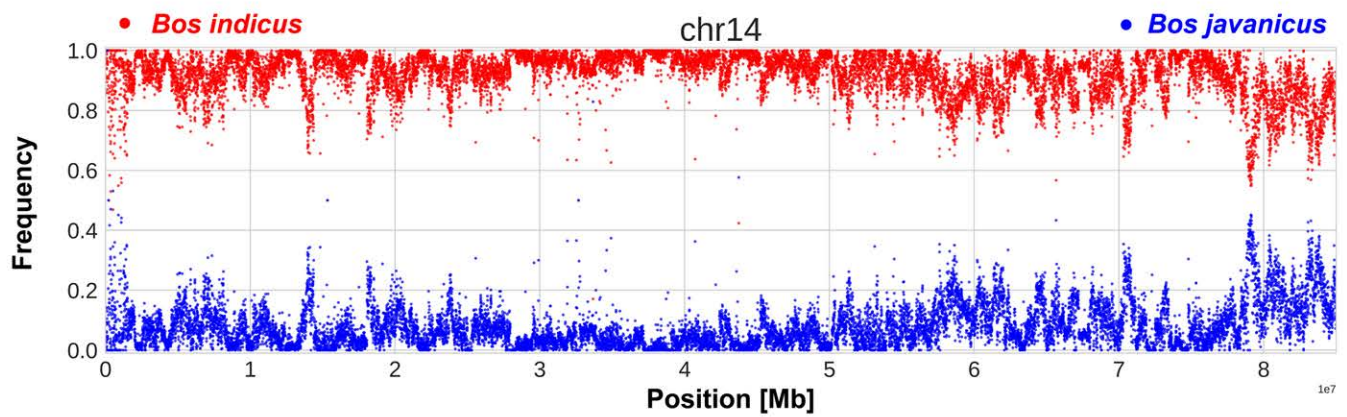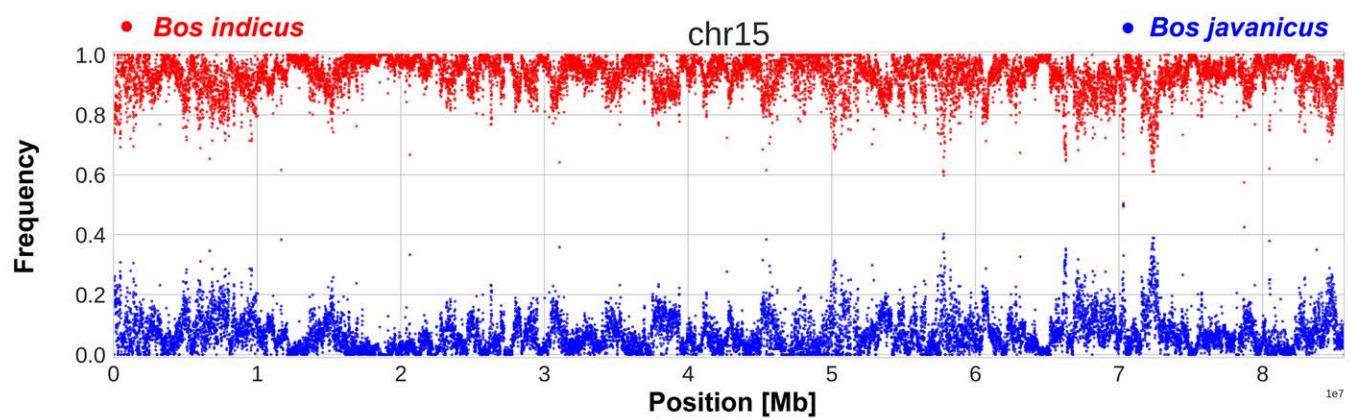

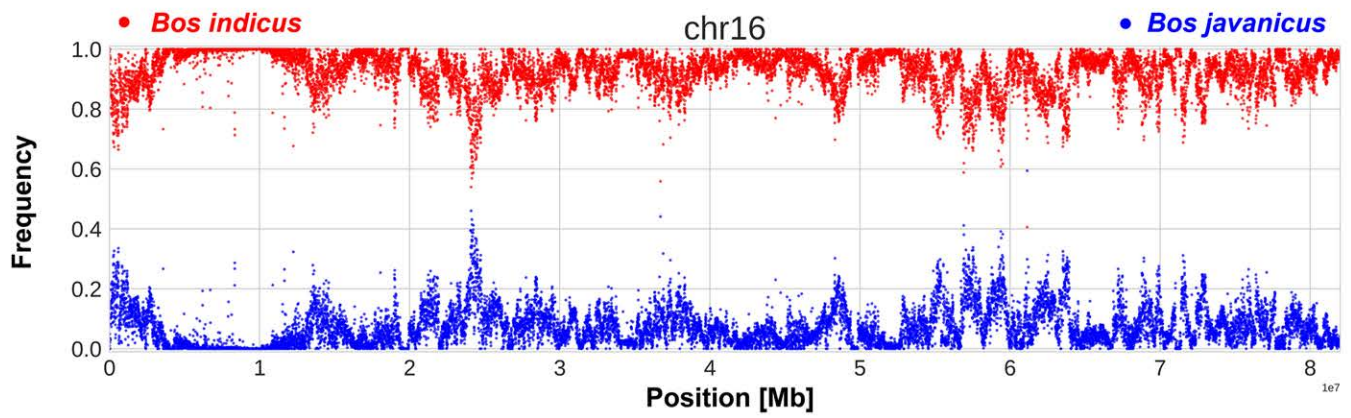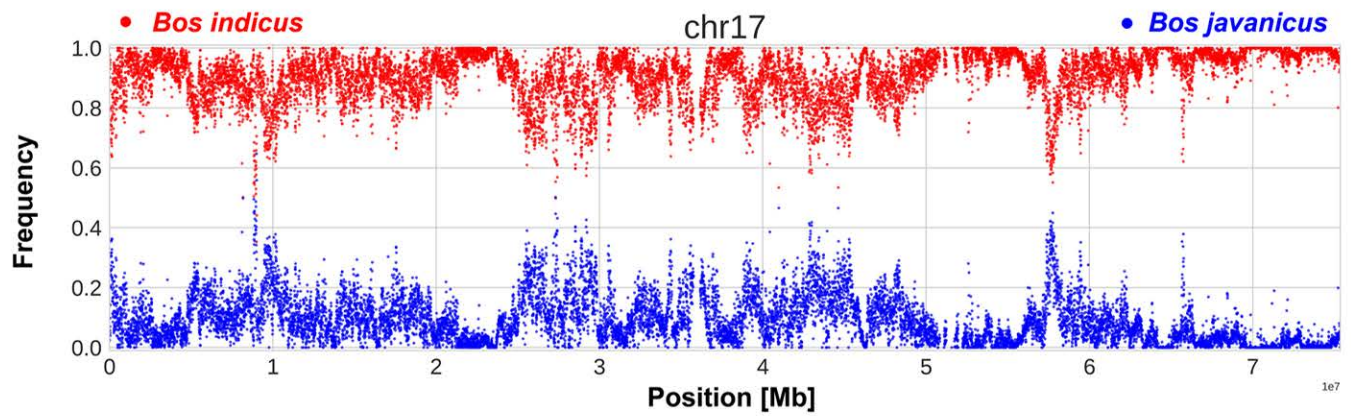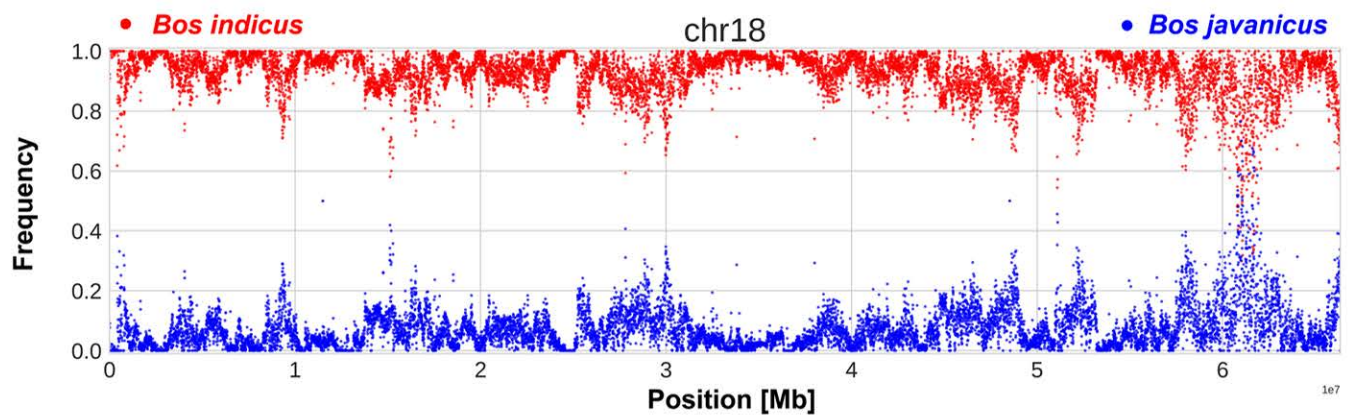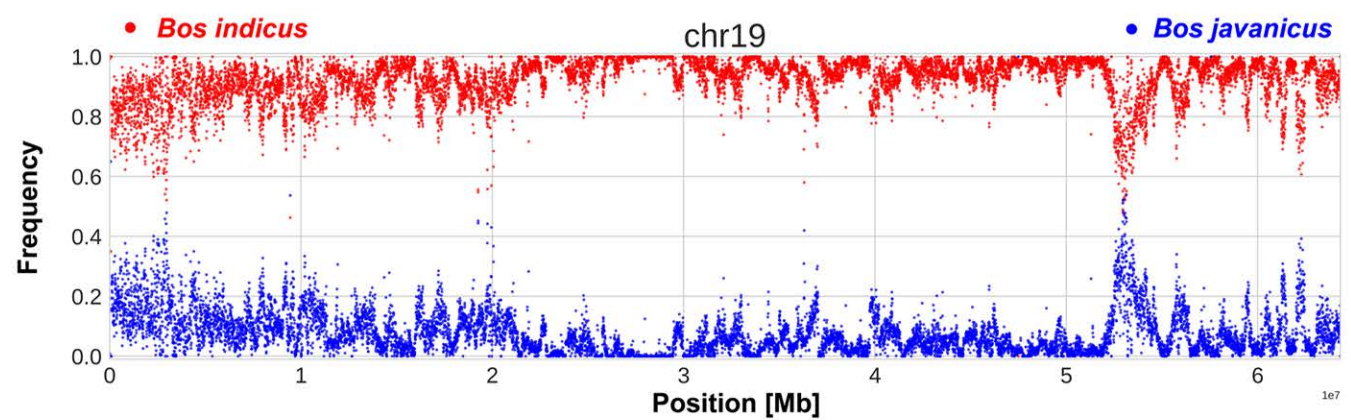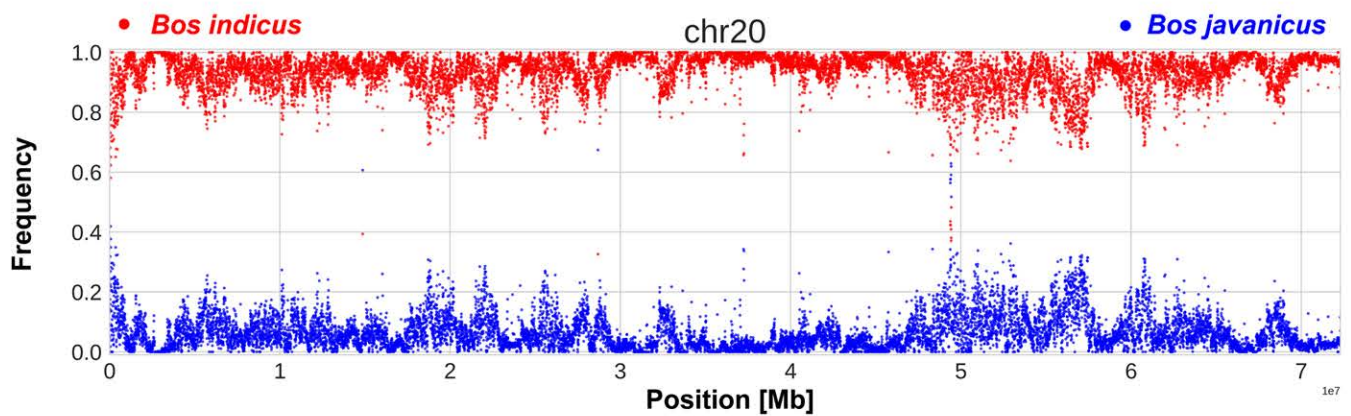

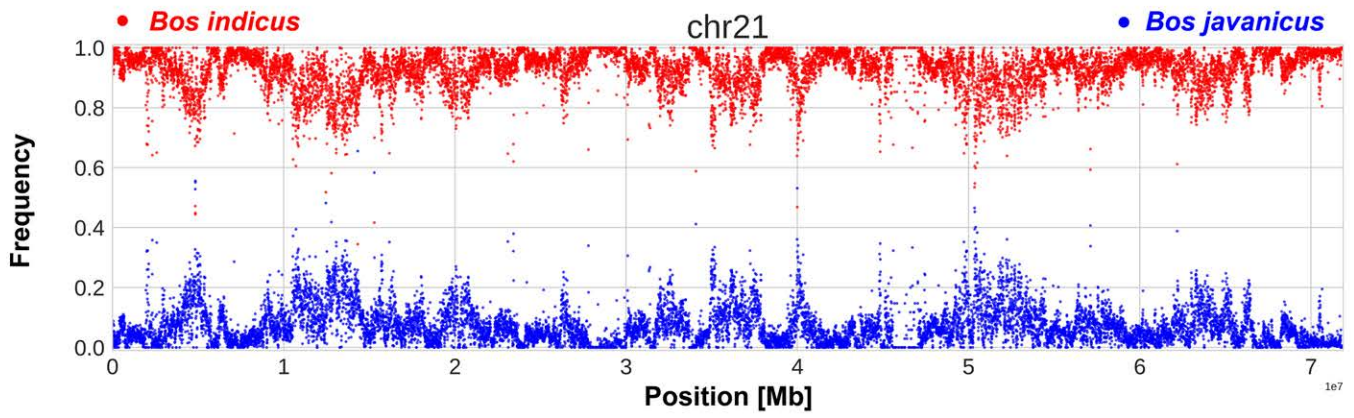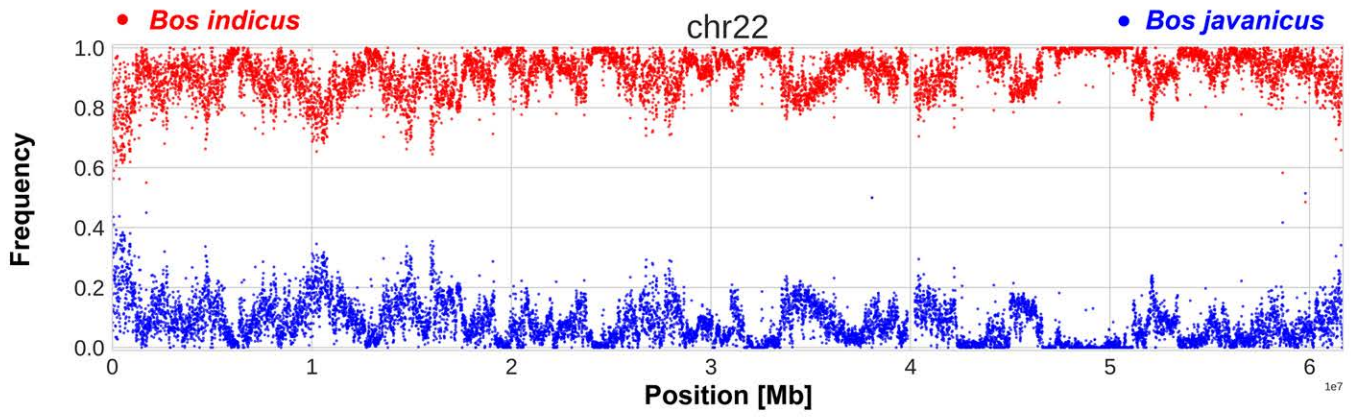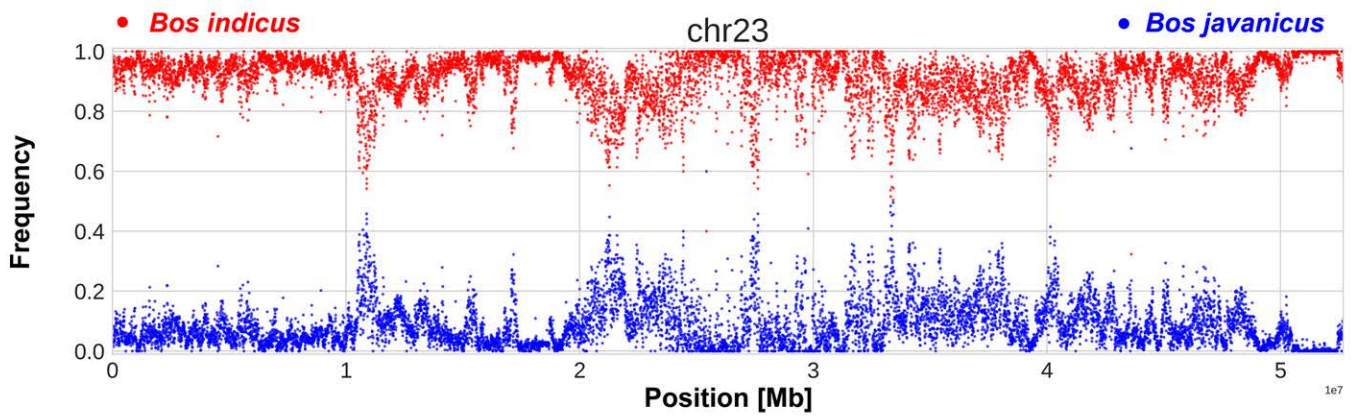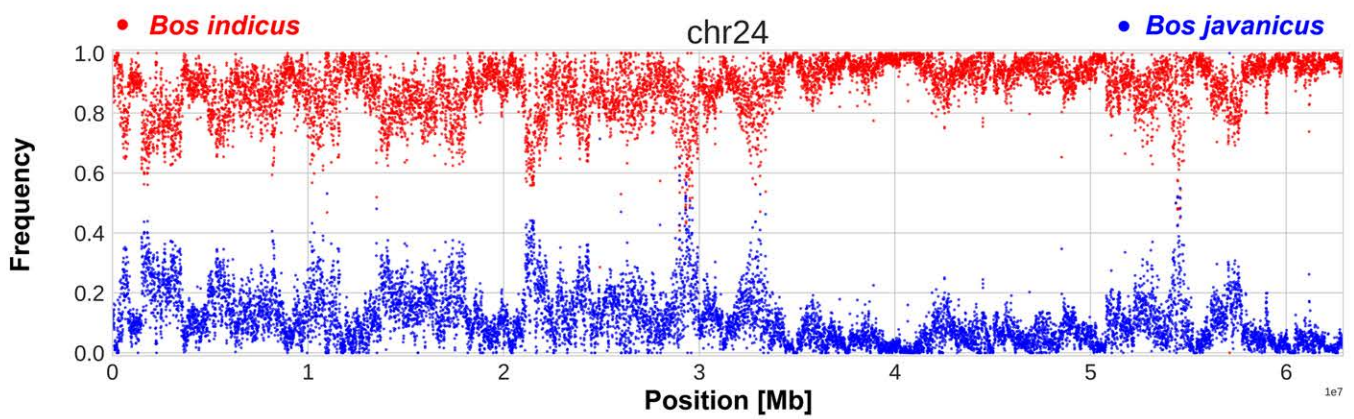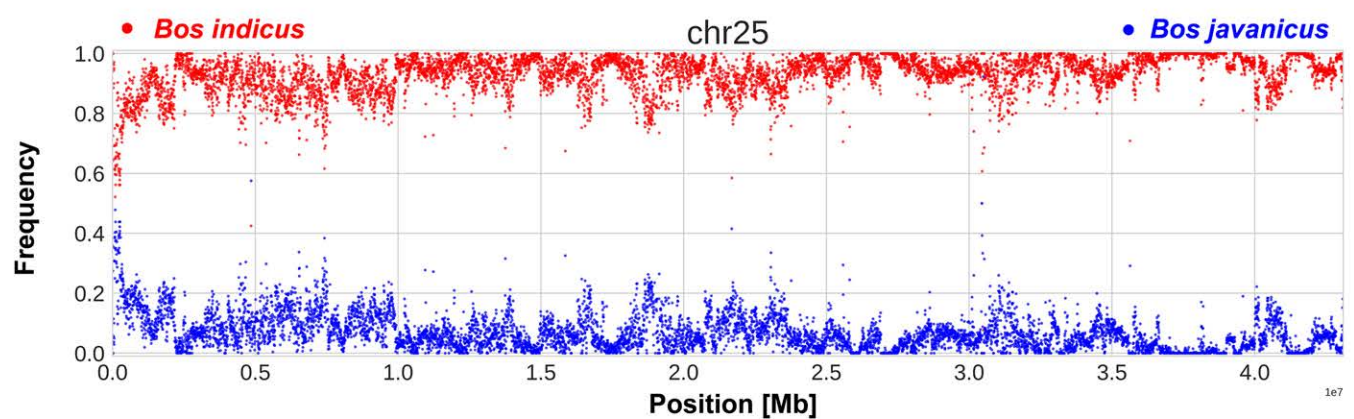

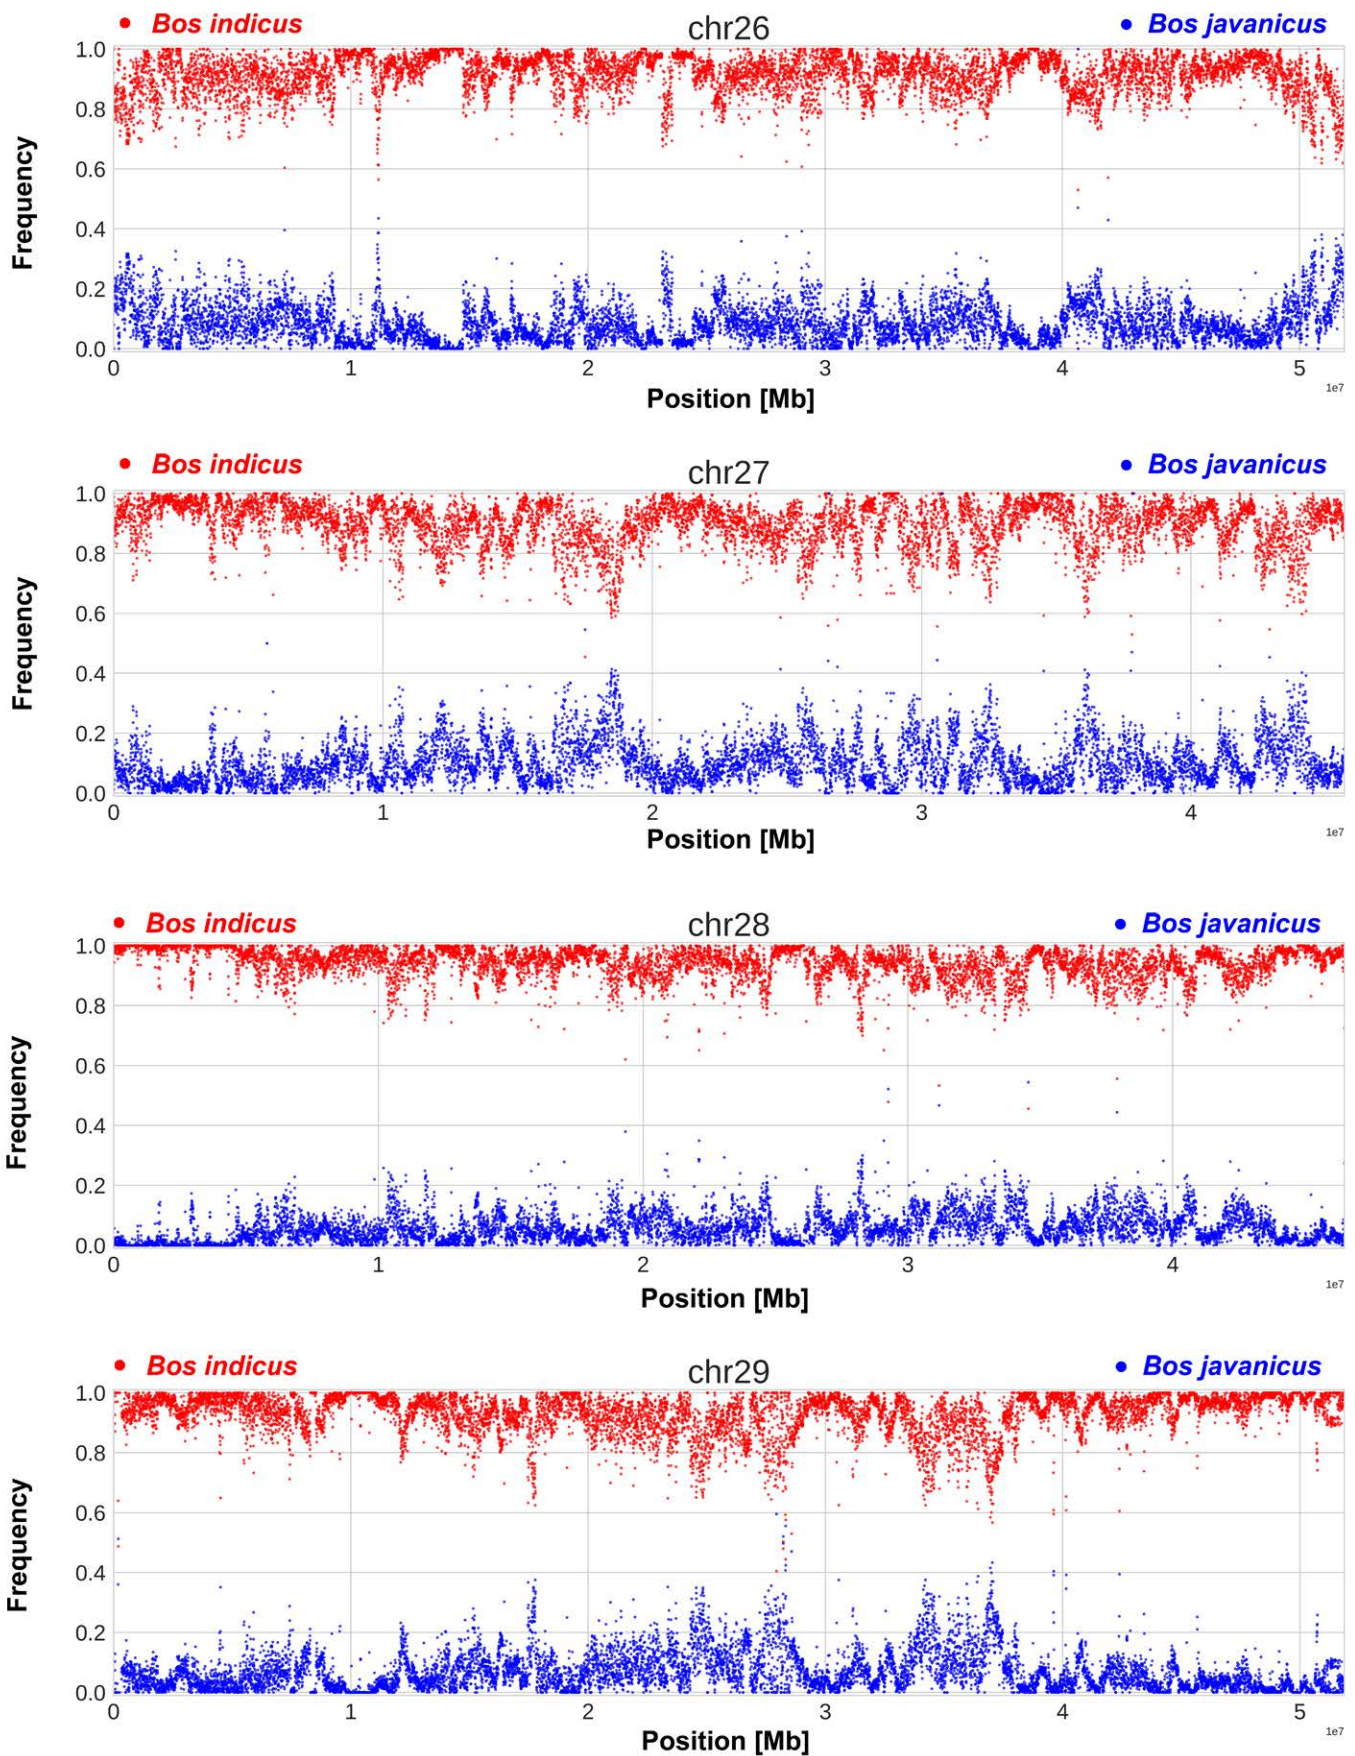

Supplementary Figure 15. Frequency of bateng and indicine alleles for all positions of banteng-specific SNPs in 5-kb sliding windows. Red and blue dots show the relative frequencies of indicine cattle and banteng-specific alleles, respectively.

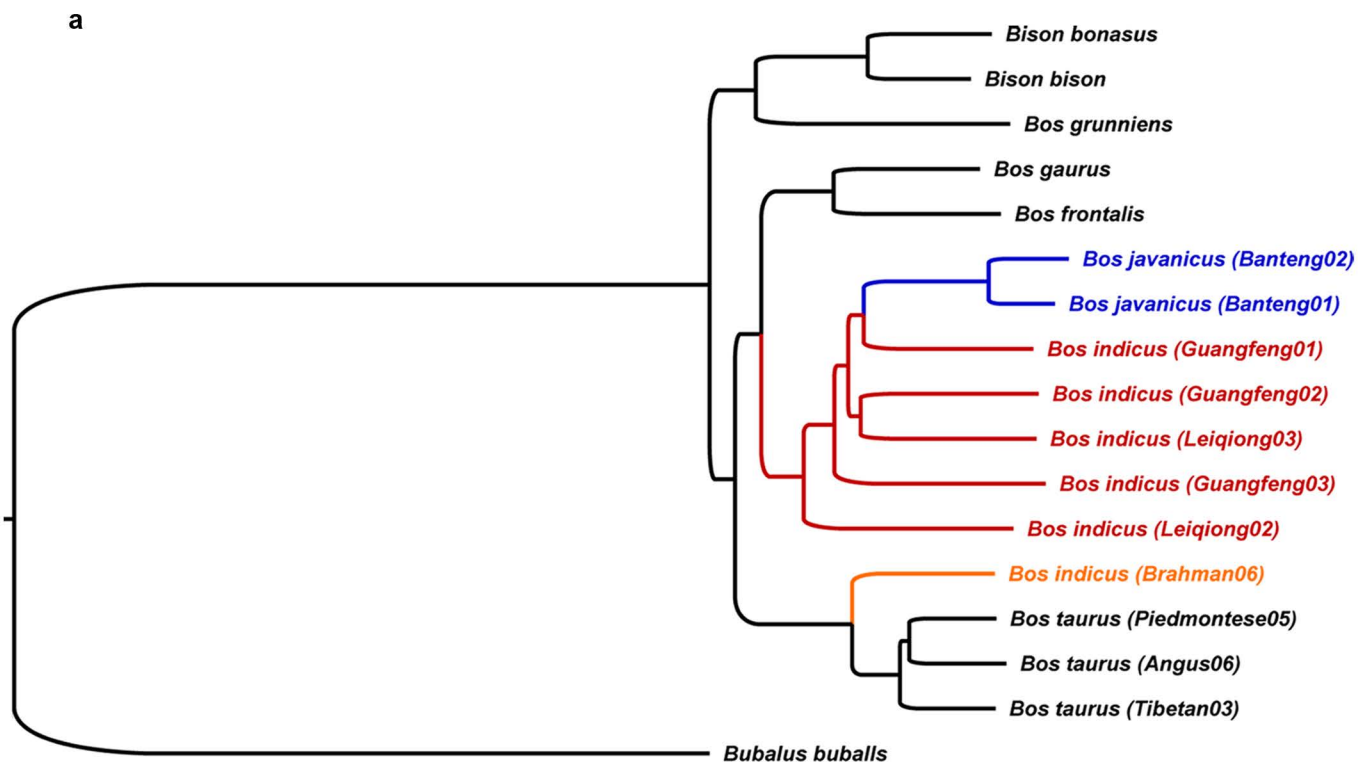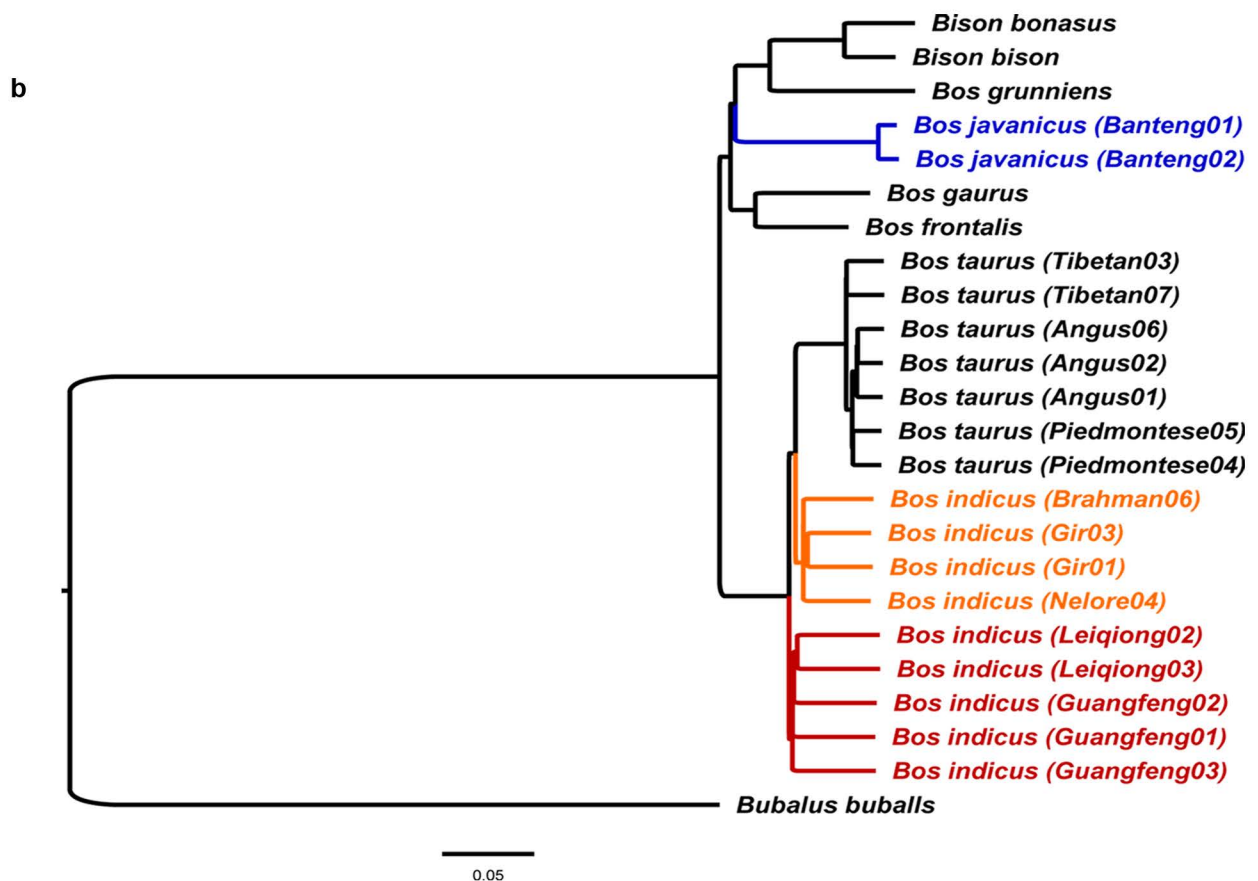

Supplementary Figure 16. Rooted neighbour-joining (NJ) tree for segments introgressed in 15 or more Chinese indicine haploids. (a) NJ tree reconstructed using PHYLIP based on the SNPs in 13 introgression intervals (Supplementary Table 23) in 15 or more Chinese indicine haploids. (b) NJ tree reconstructed using PHYLIP based on whole-genome SNPs without all introgression intervals. The path to pure *Bos indicus* (Nelore) is emphasized by an orange line and letters whereas paths to introgressed *Bos indicus* are emphasized by red lines and letters. Two *Bos javanicus* cattle are emphasized by blue lines and letters.

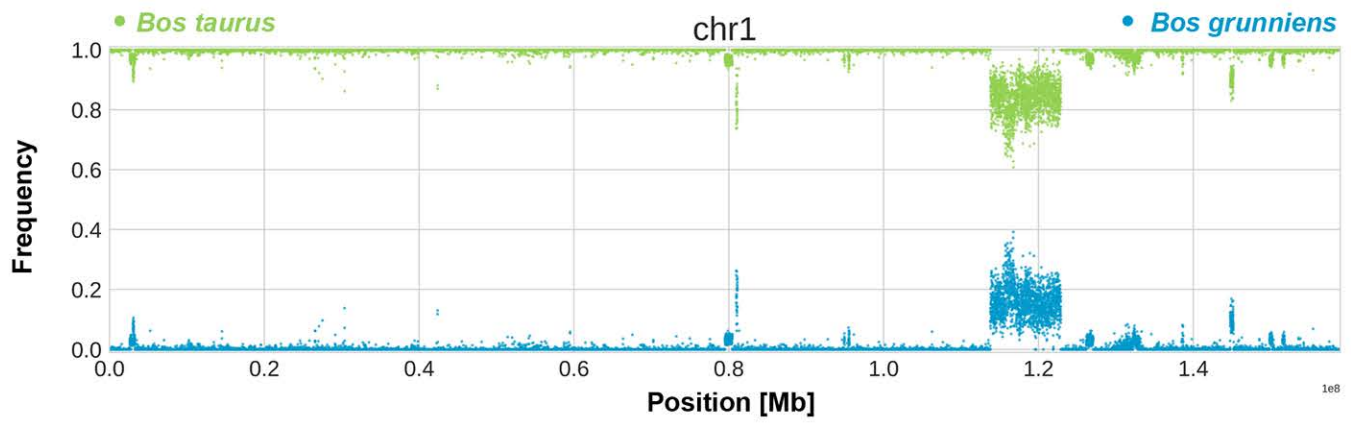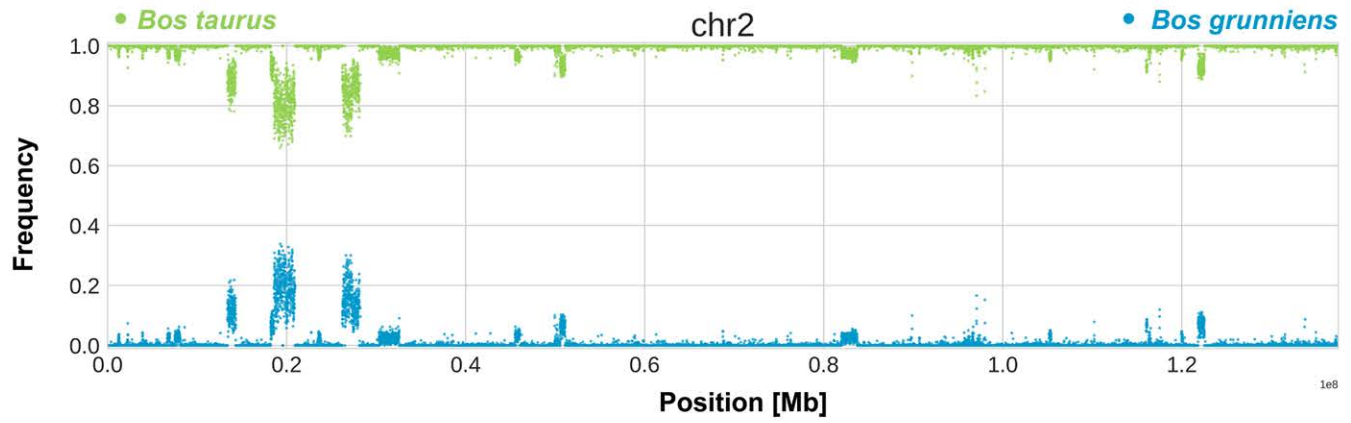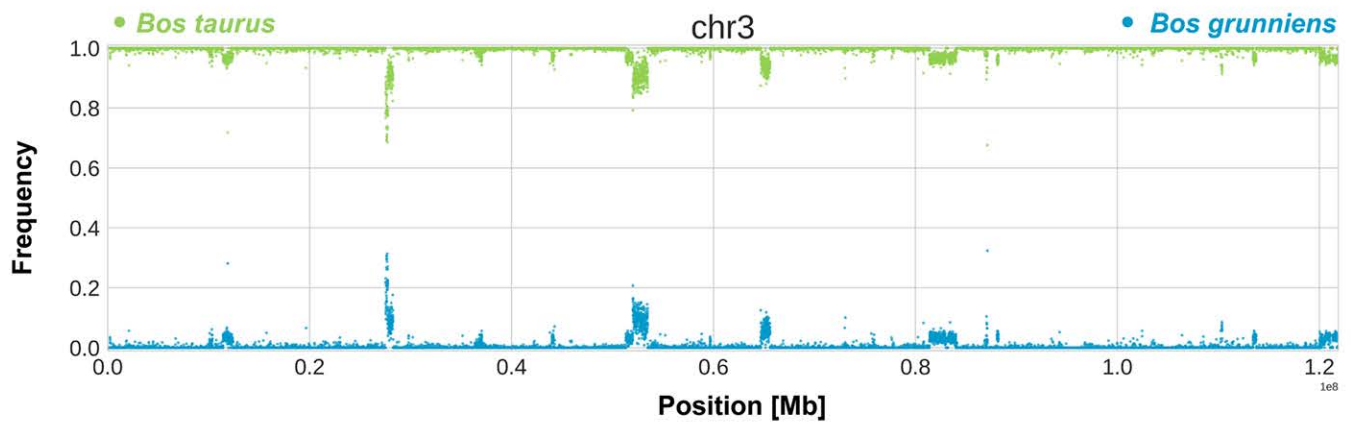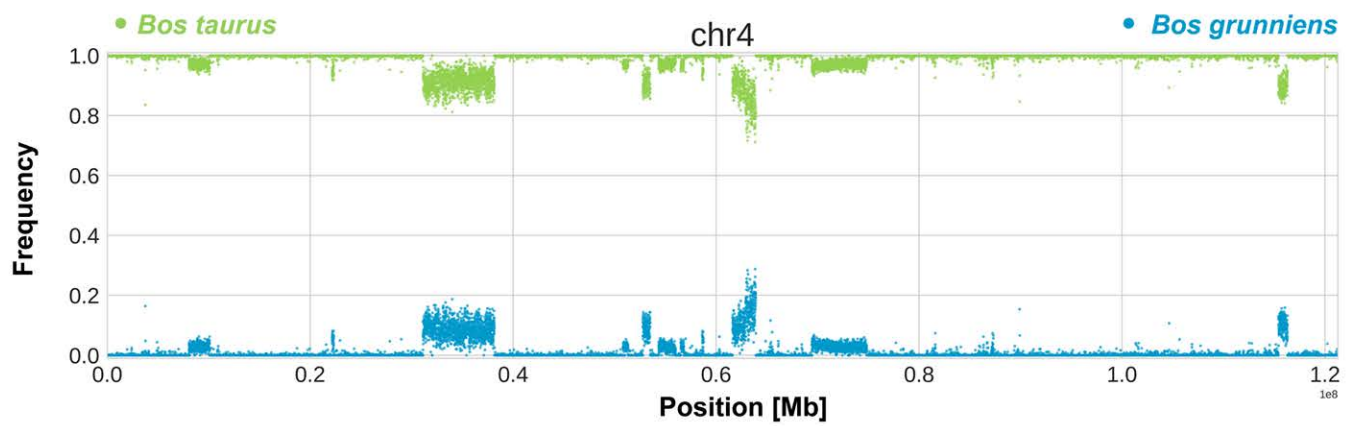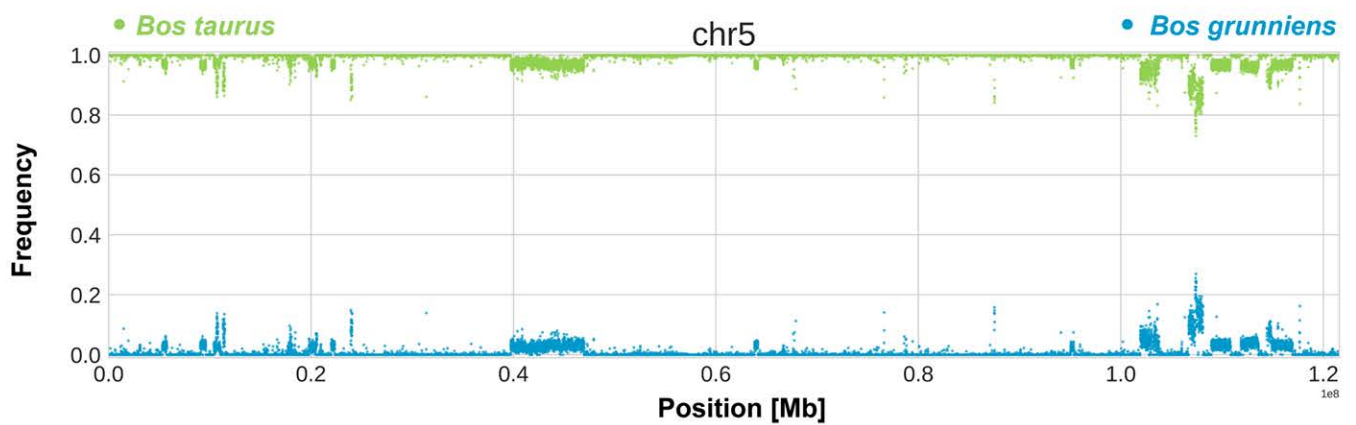



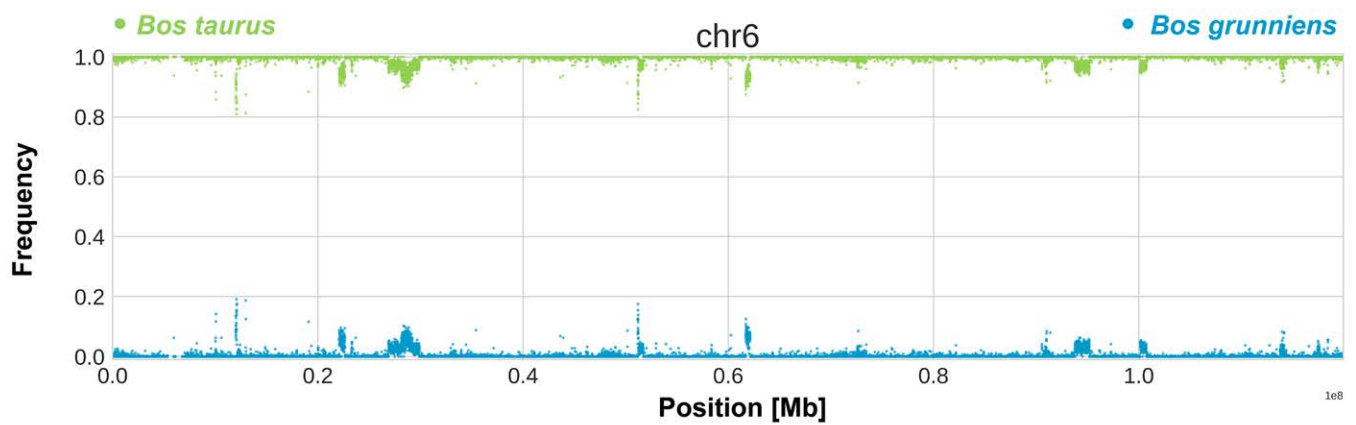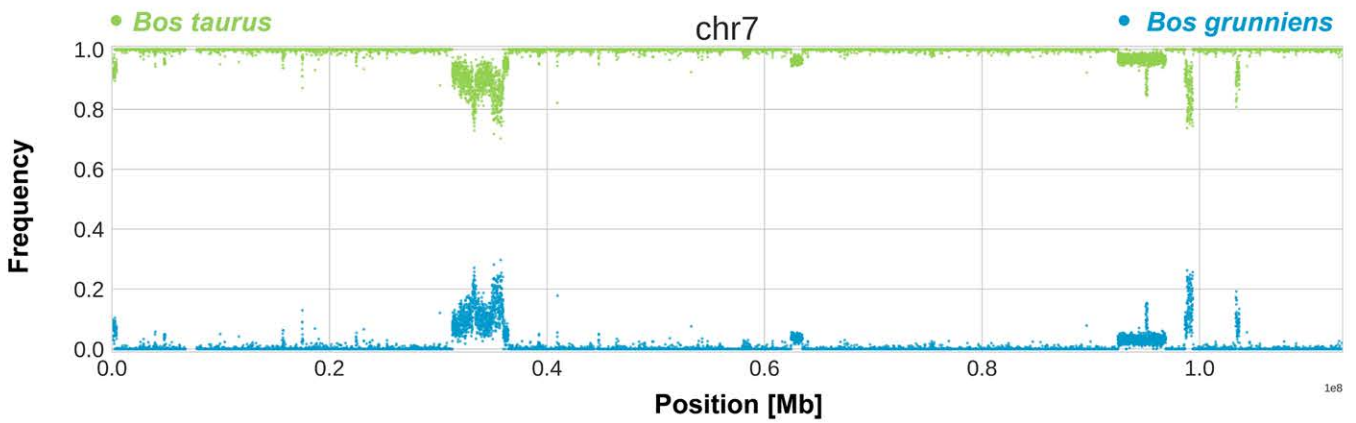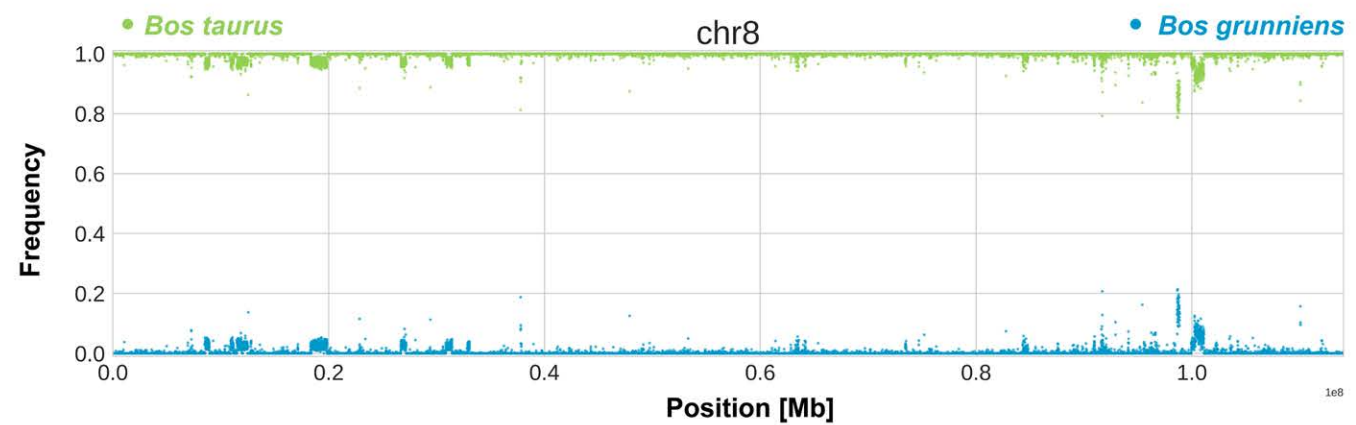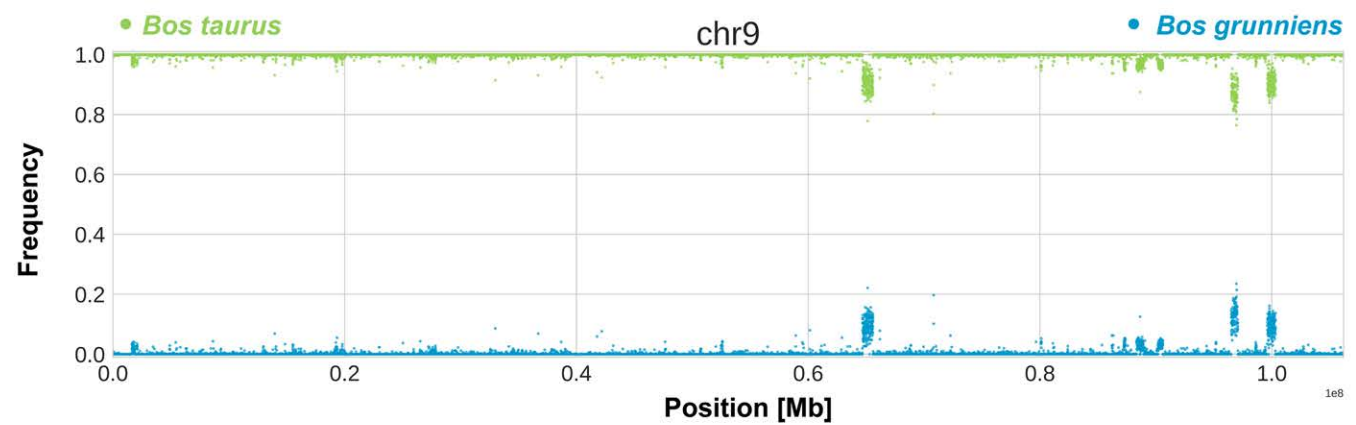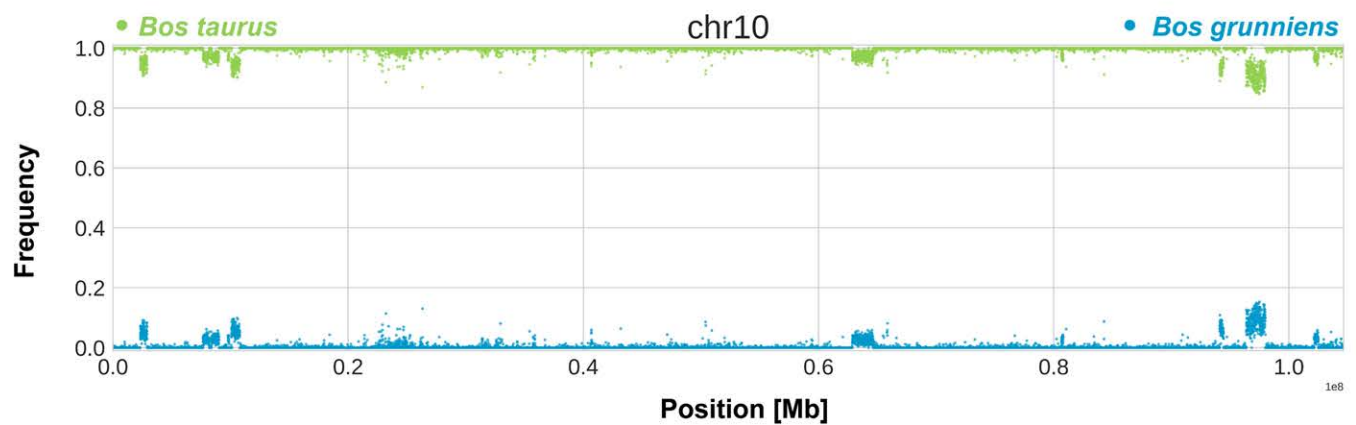

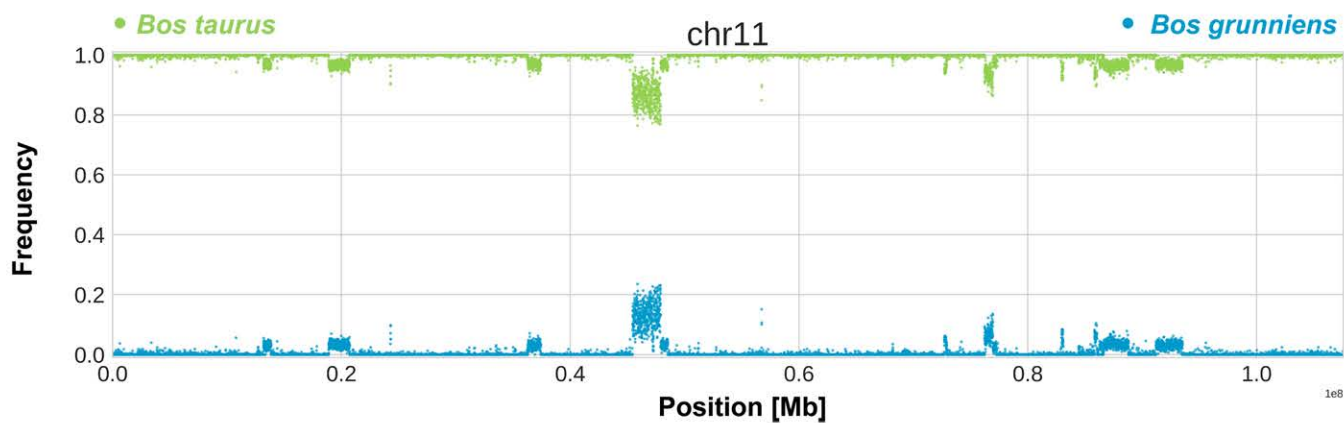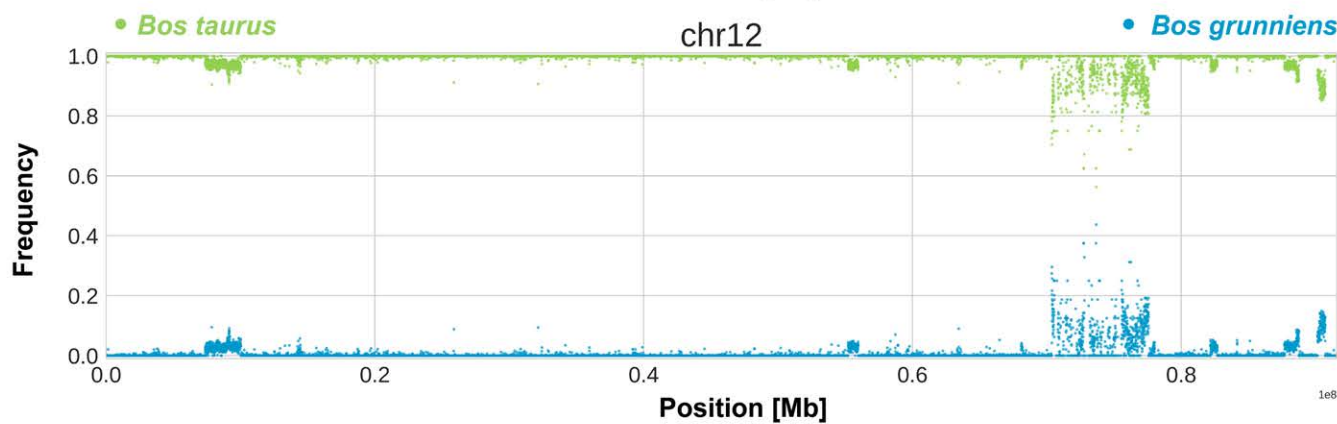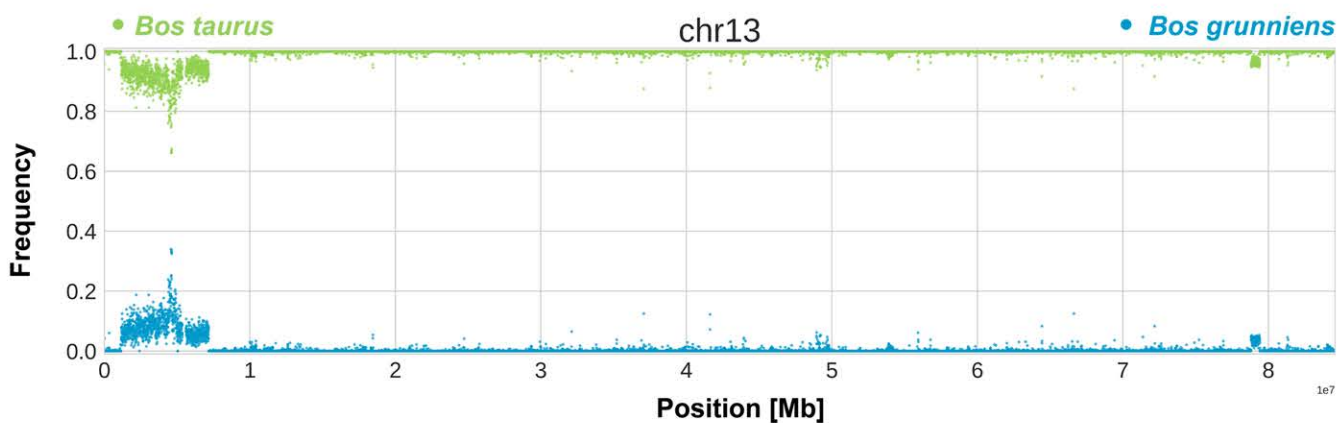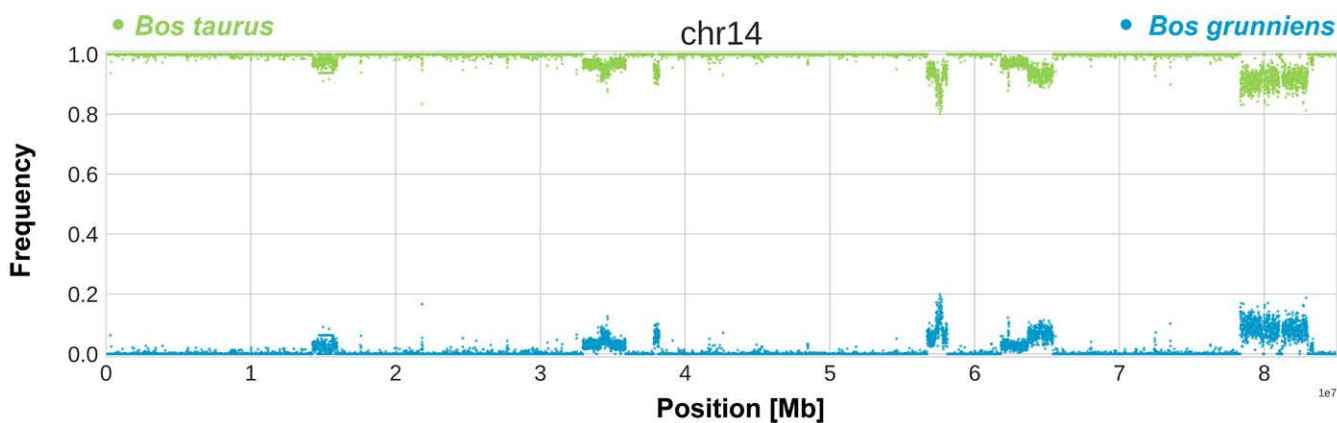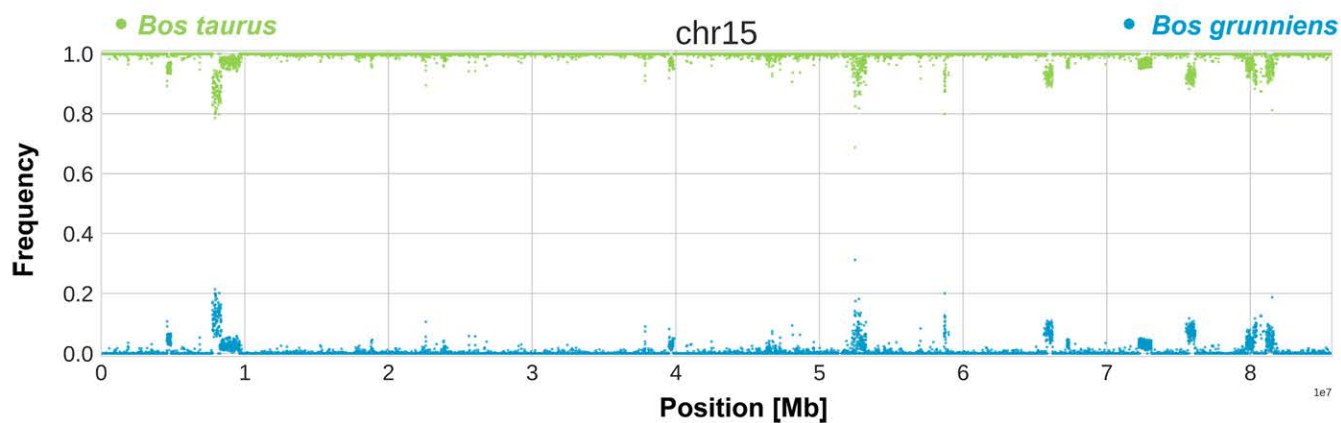

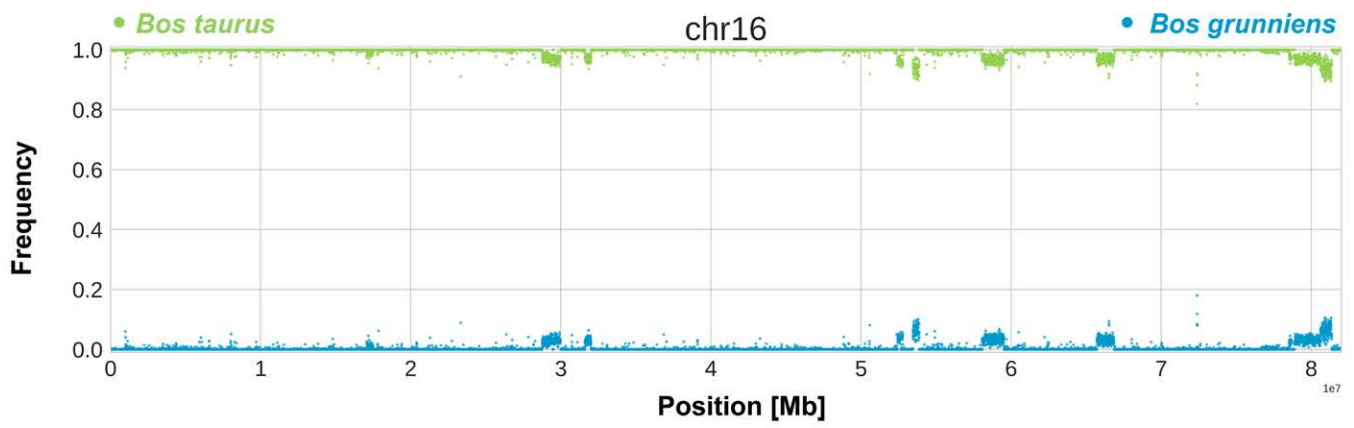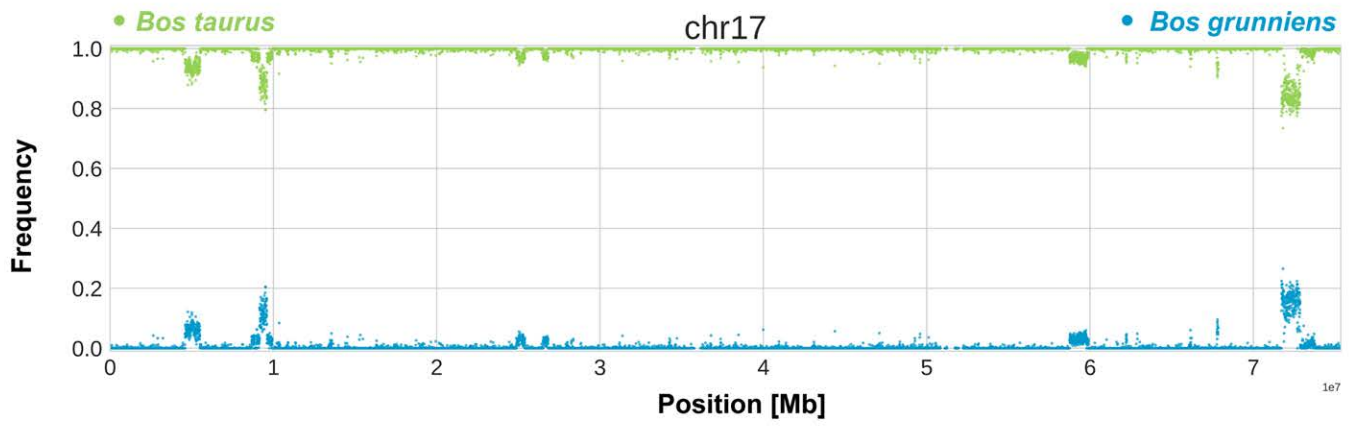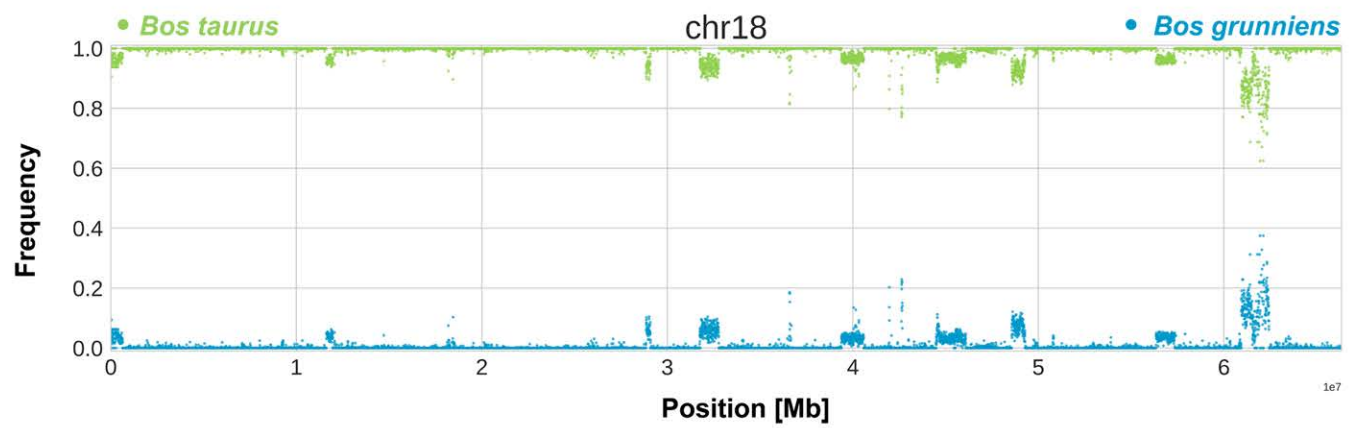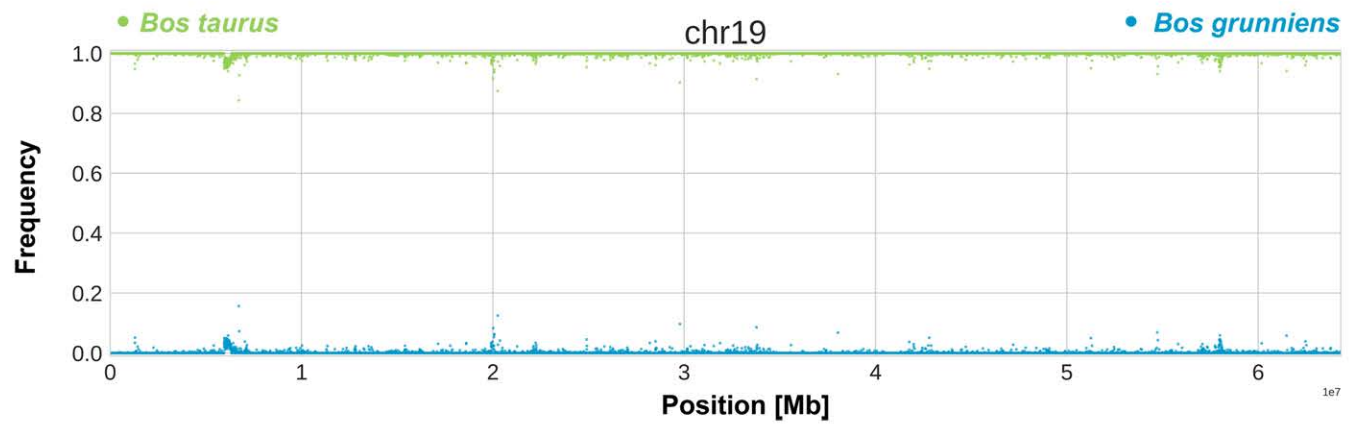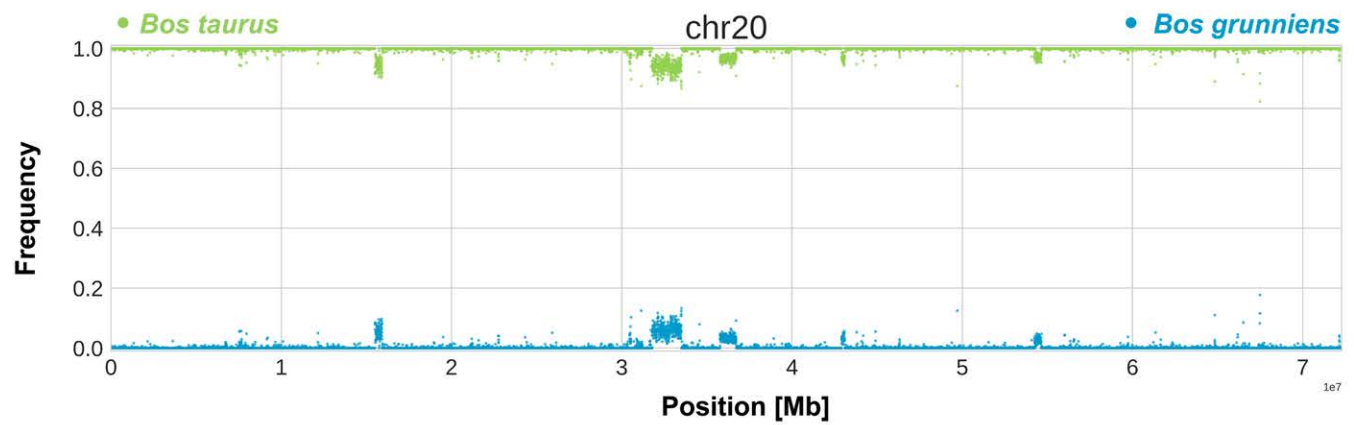

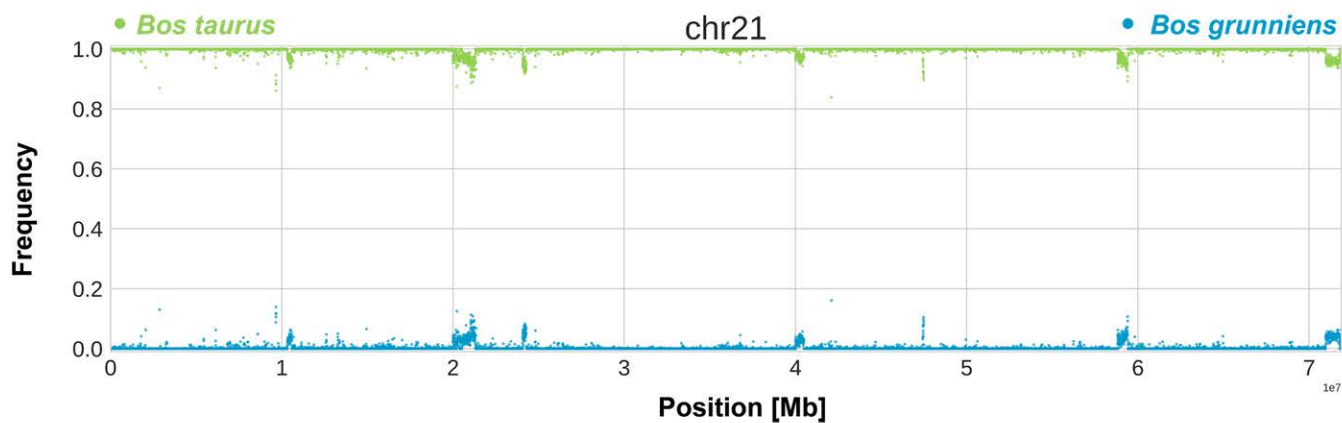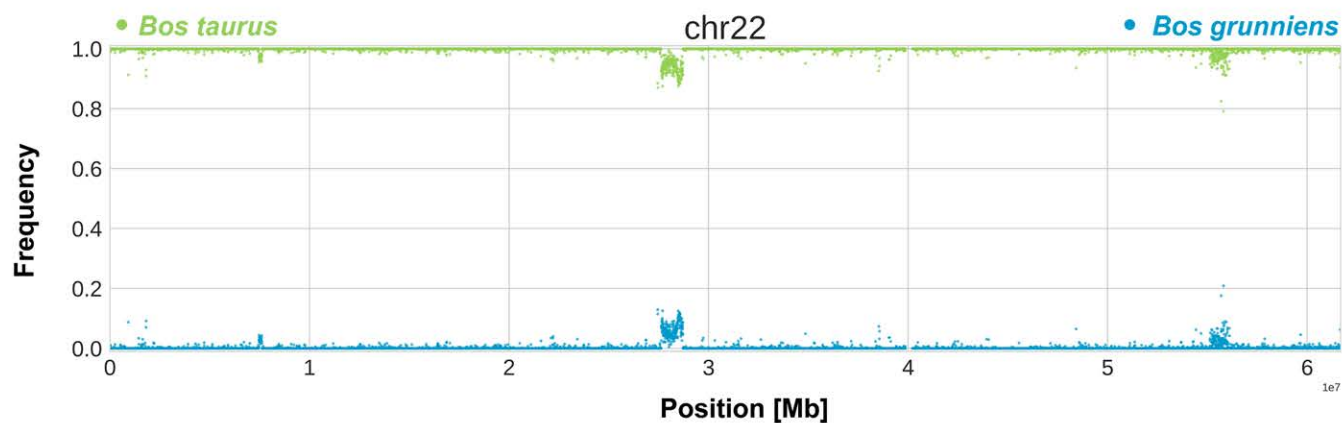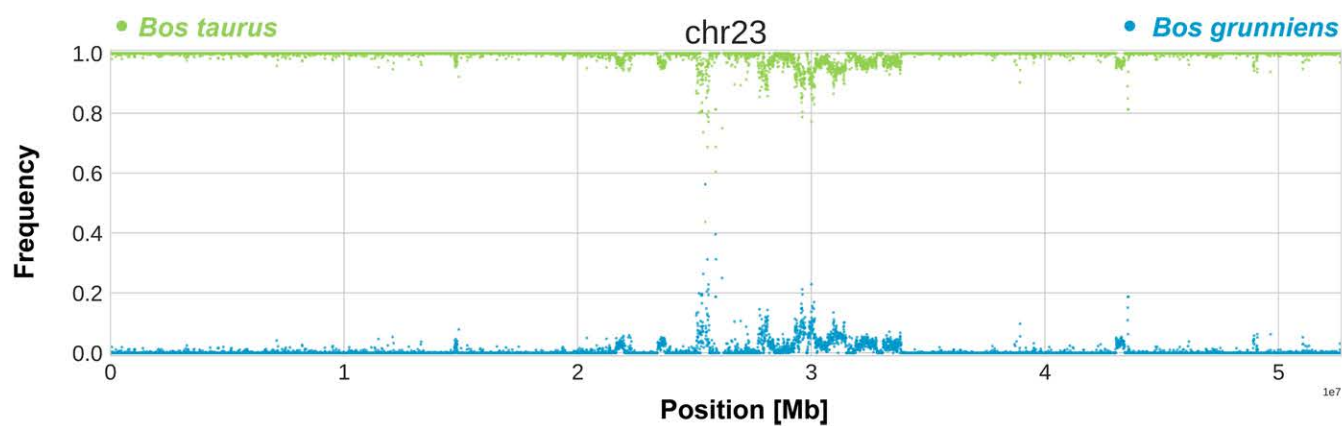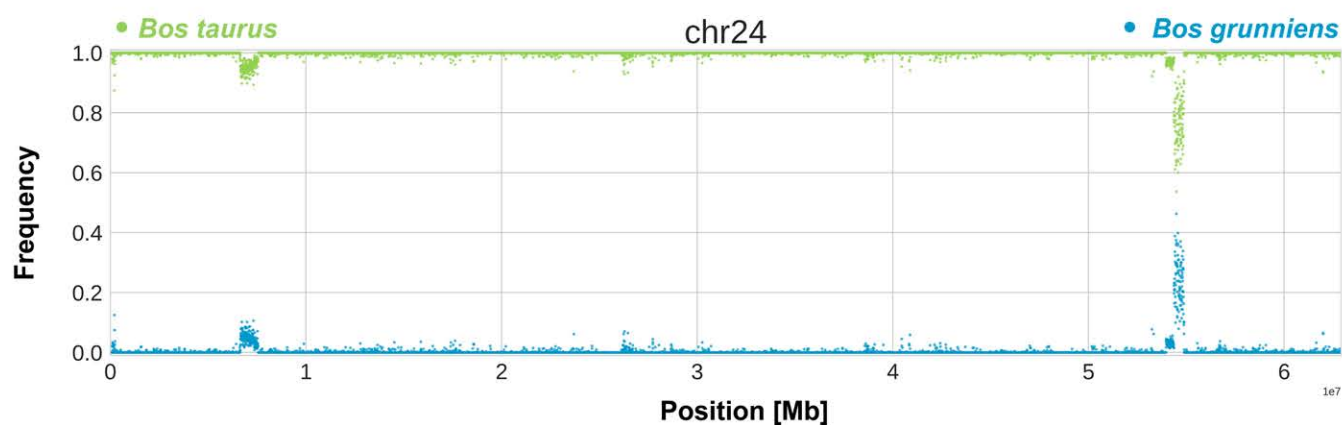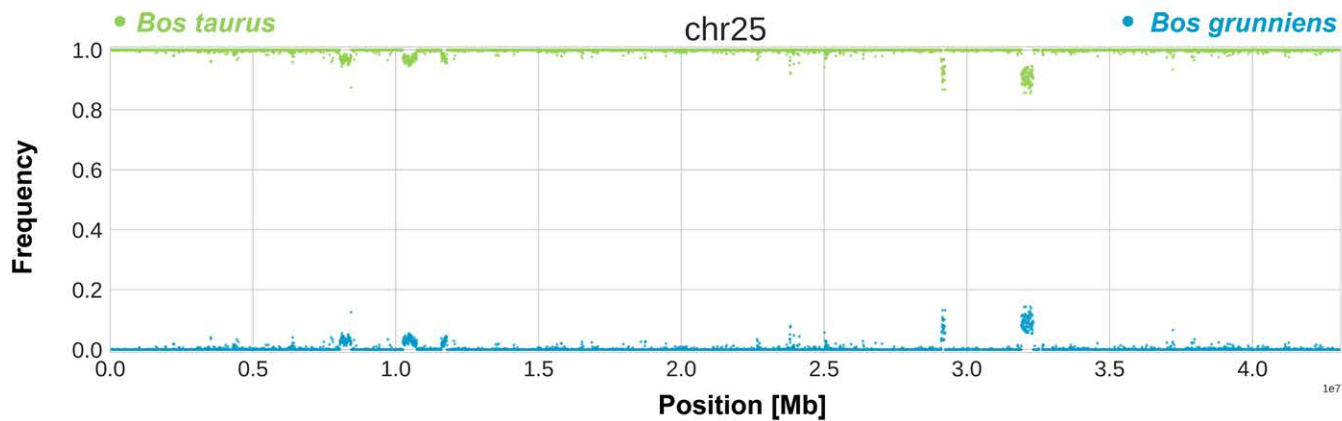

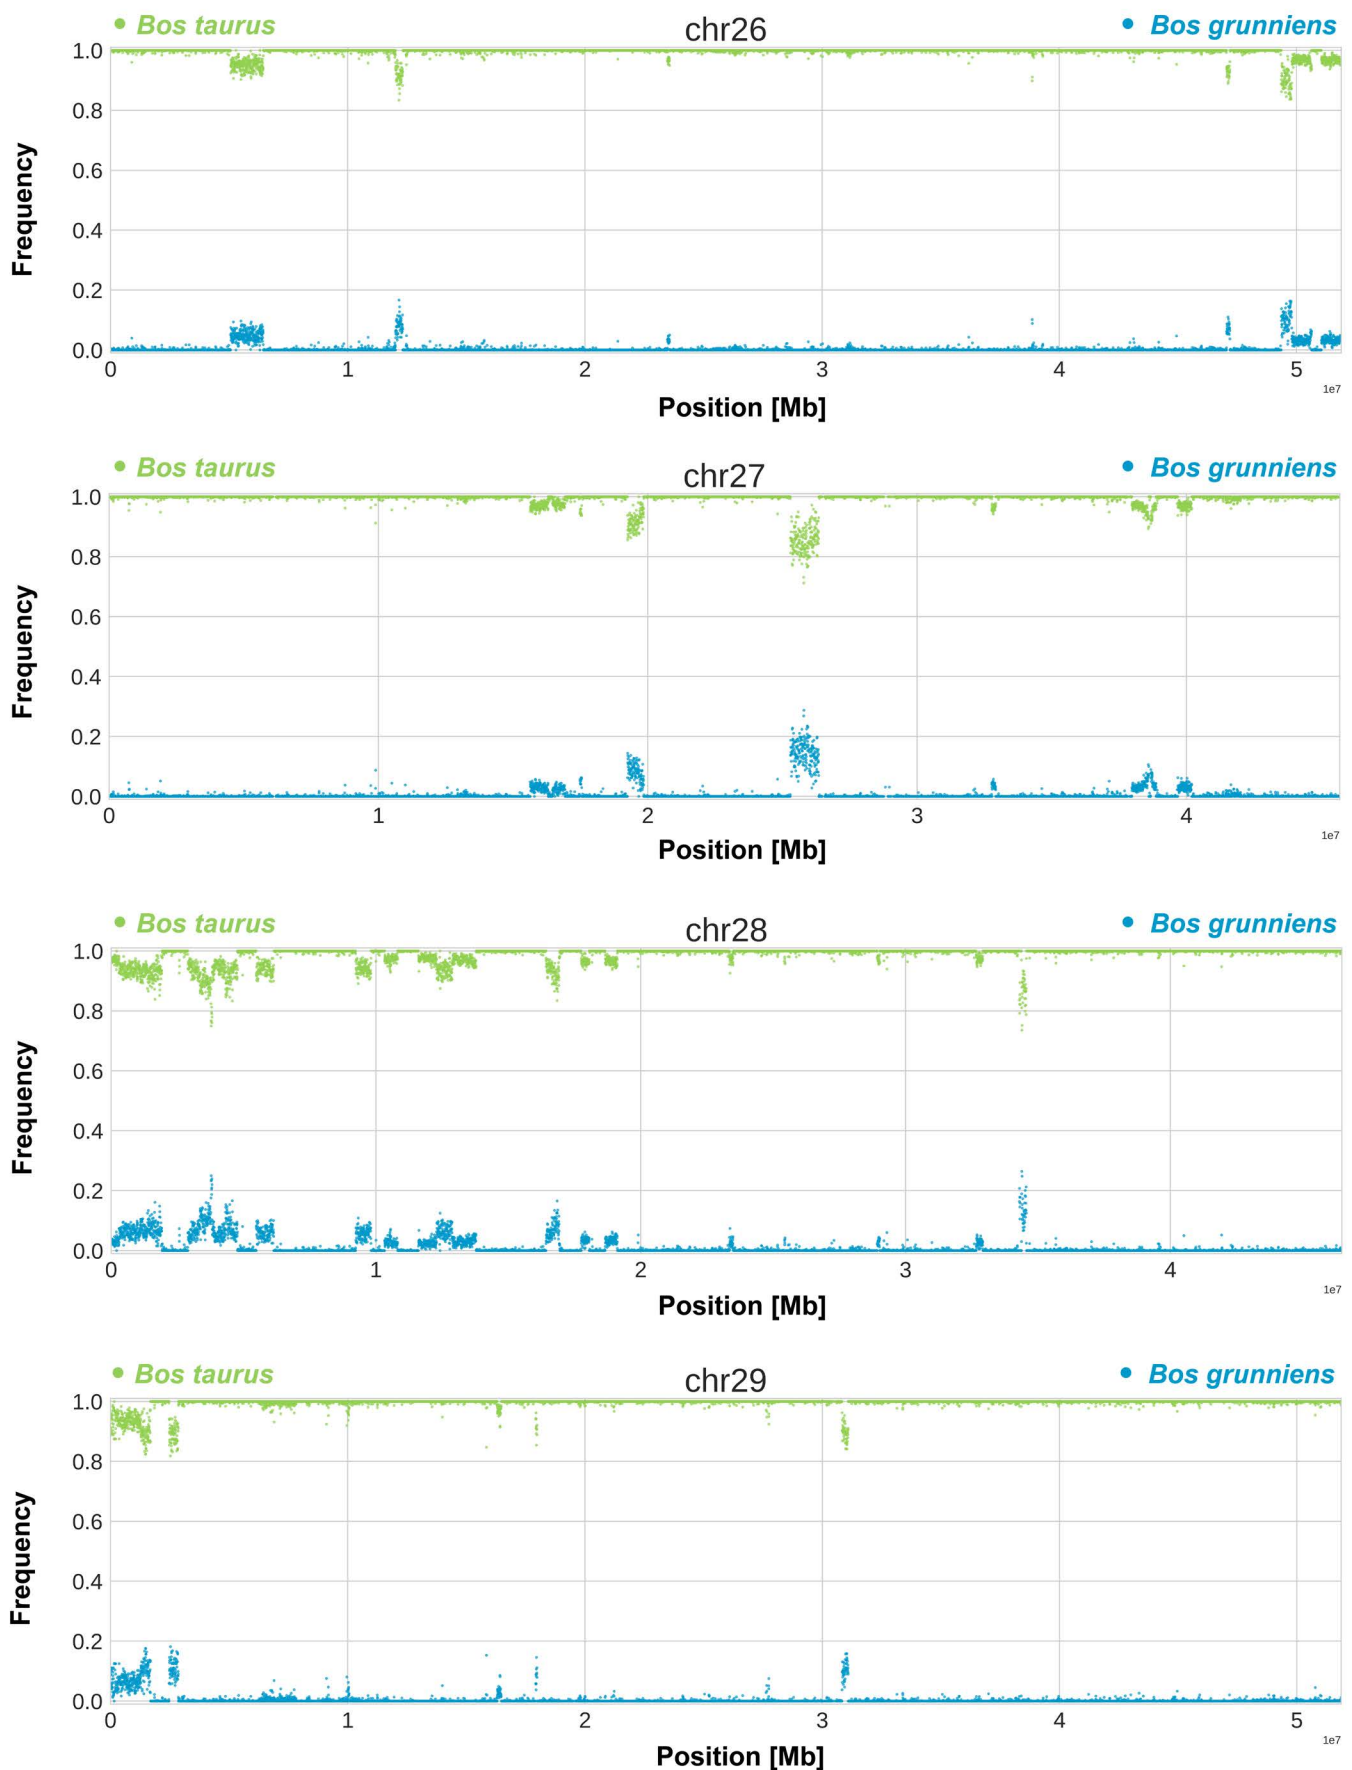

**Supplementary Figure 17. Frequency of yak and bovine alleles for all positions of yak-specific SNPs in 5-kb sliding windows. Green and sky-blue dots show the relative frequencies of taurine- and yak-specific alleles, respectively.**

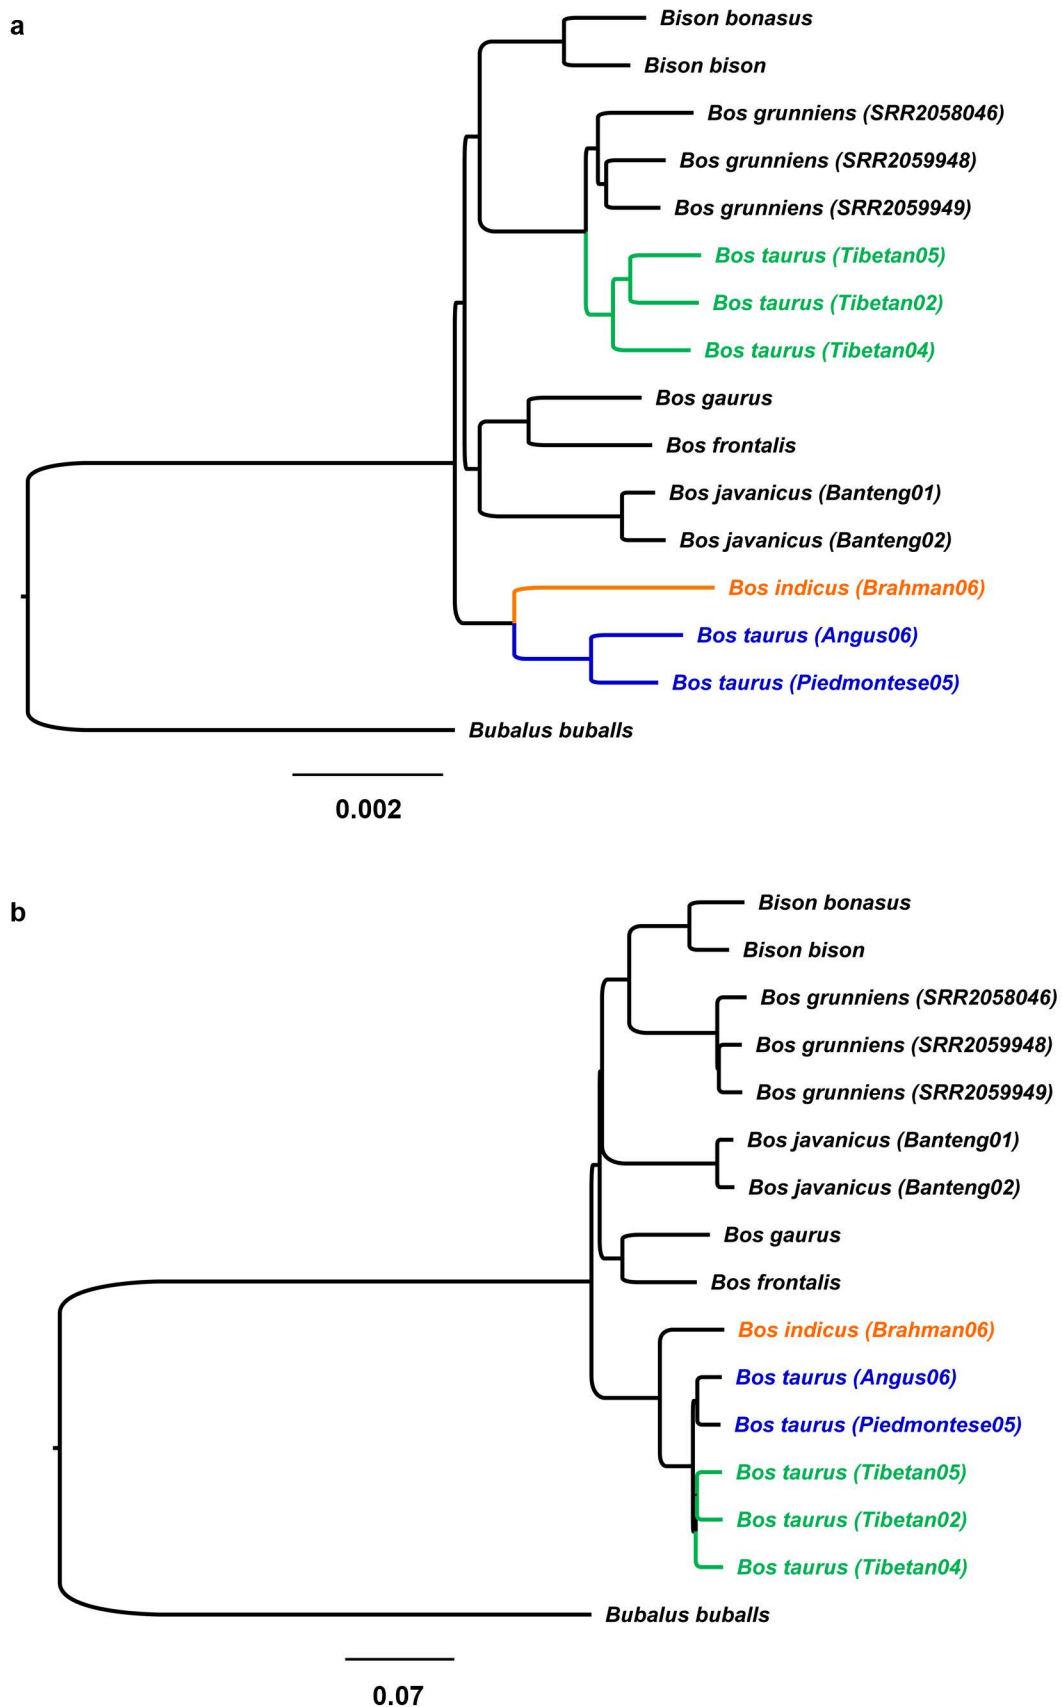

Supplementary Figure 18. Rooted neighbour-joining (NJ) tree for segments introgressed in ten or more yak haploids (a) Rooted NJ tree reconstructed using PHYLIP based on the SNPs in 30 introgression intervals in eight or more Tibetan taurine haploids. (b) NJ tree reconstructed using PHYLIP based on whole-genome SNPs without all introgression intervals. The path to pure *Bos taurus* are emphasized by blue lines and letters, whereas paths to introgressed Tibetan taurine cattle are emphasized by green lines and letters. The *Bos indicus* individual is emphasized by an orange line and letters.

ATOH Chr6:31.9-32.3M

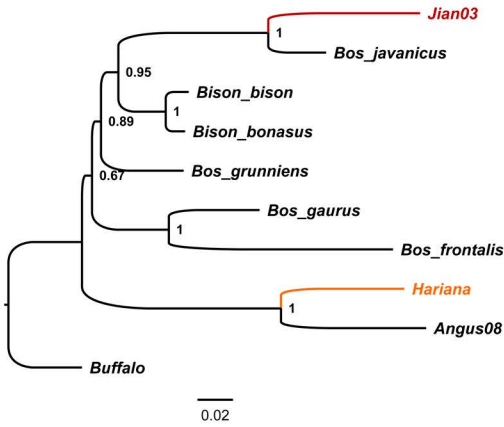

HSPA4 Chr7:45.7-46.6 M

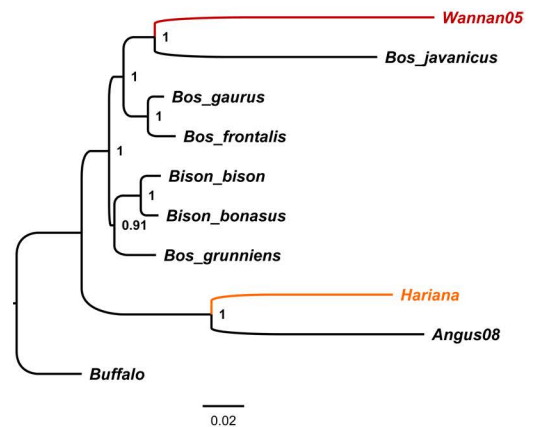

GNA14, VPS13A Chr8:53.8-54.9M

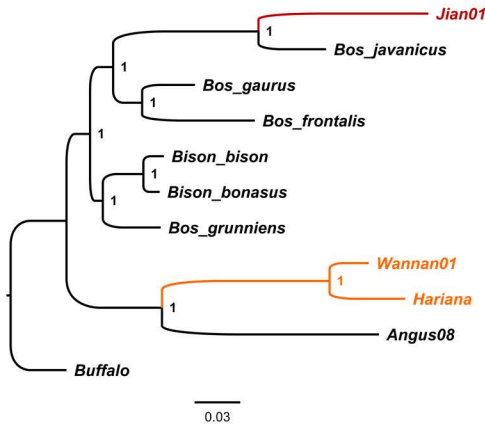

HSF2 Chr9:27.6-29.6 M

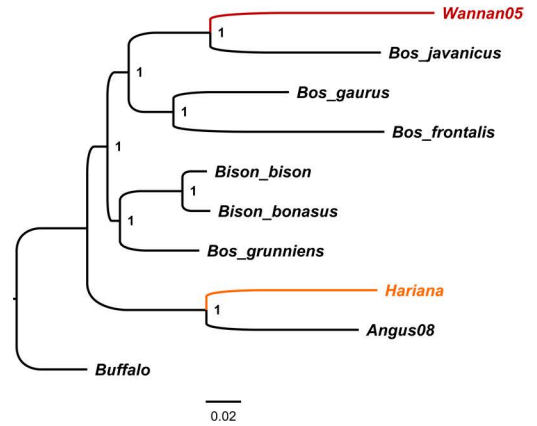

HSPB2 Chr15:22.6-23.0 M

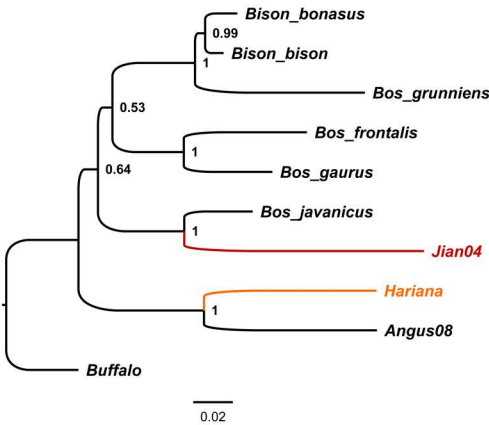

HSPA8 Chr15:34.3-34.5 M

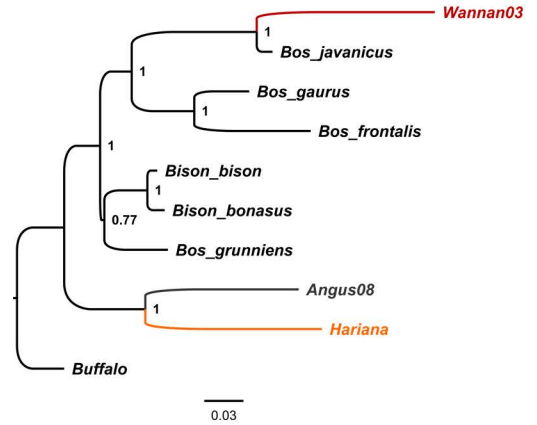

KIF2 Chr19:3.8-4.3 M

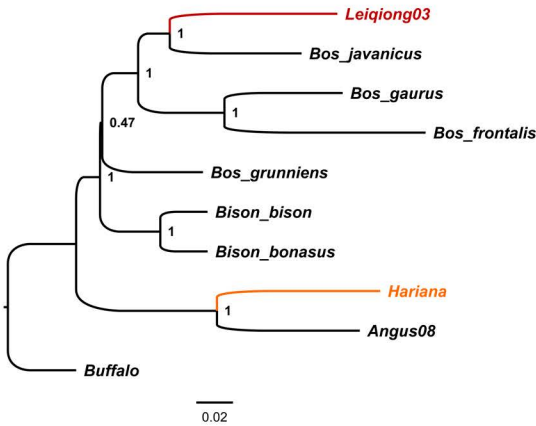

HSPA1A, HSPA1L Chr23:27.2-27.7 M

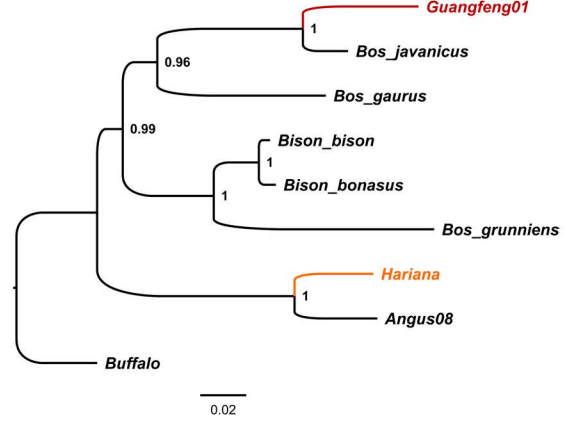

Supplementary Figure 19. Phylogenetic analyses of eight introgressed segments involving in the thermotolerance in Chinese indicine cattle genomes. Each phylogenetic tree is named by gene name and approximate genomic position. Detail information of investigated sequences is presented in Supplementary Table 23. Seven Bovini haplotypes were: Banteng (*Bos javanicus*), Gaurus (*Bos gaurus*), Gayal (*Bos frontalis*), Yak (*Bos grunniens*), American Bison (*Bison bison*), Wisent (*Bison bonasus*), and Buffalo (*Bubalus bubalis*). Indian indicine postulated as pure (orange letters) and Chinese indicine with estimated cattle introgression for this segment (red letters).

**MBNL1** Chr1:116.5-117.2 M

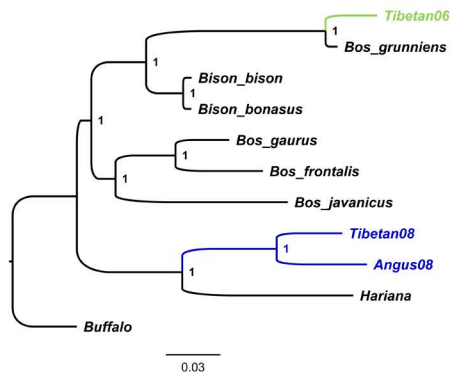

**TIGAR** Chr5:106.4-107.6

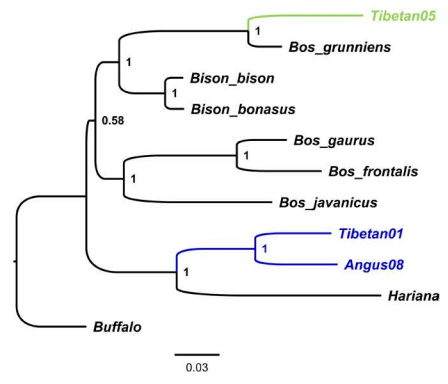

**IL1A, IL1B** Chr11:46.3-47.0 M

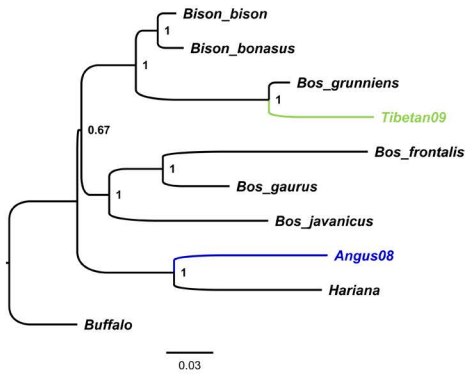

**COPS5** Chr14:33.3-33.6 M

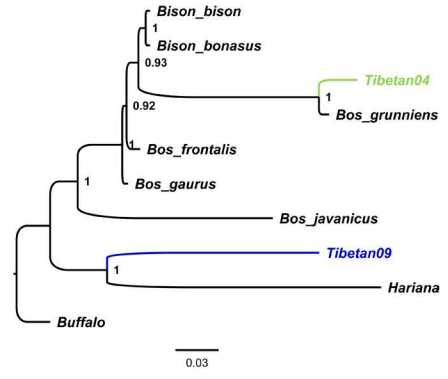

**CRYAB, SDHD** Chr15:22.6-22.9 M

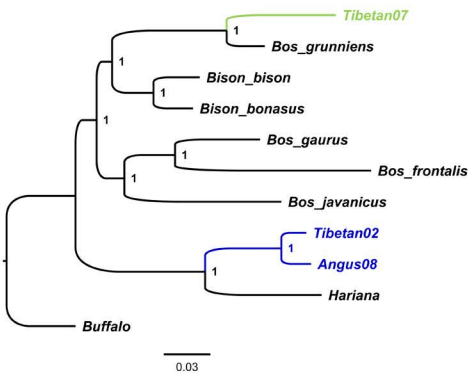

**MMP3** Chr15:5.07-6.17 M

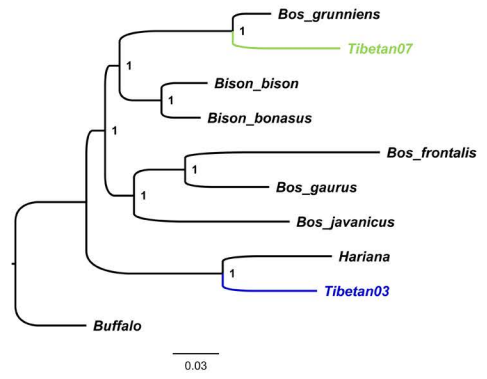

**ACAA2** Chr24:50.0-55.5 M

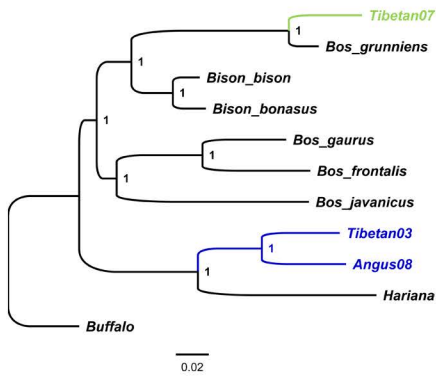

**RRC3B** Chr27:39.402-39.406 M

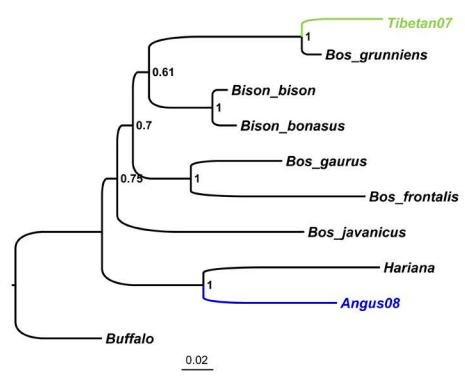

**EGLN1** Chr28:32.9-33.1 M

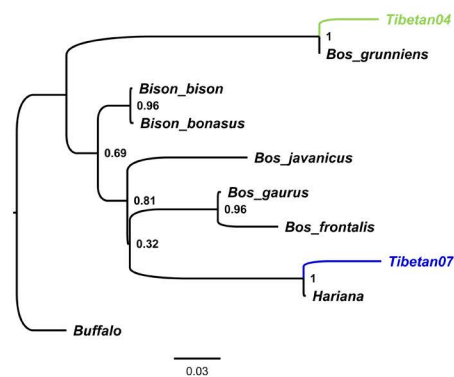

**RYR2** Chr28:103.5-105.6 M

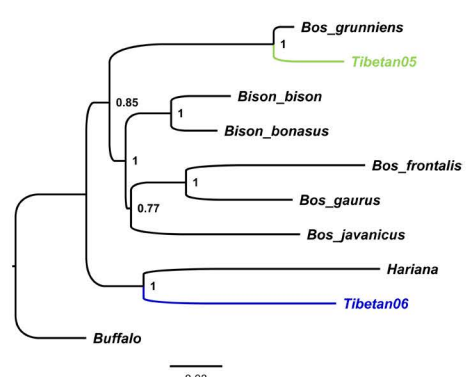

**Supplementary Figure 20. Phylogenetic analyses of 10 introgressed segments involving in response hypoxia in Tibetan taurine cattle genomes. Each phylogenetic tree is named by gene name and approximate genomic position. Detail information of investigated sequences is presented in Supplementary Table 28. Seven Bovini haplotypes were: Banteng (*Bos javanicus*), Gaurus (*Bos gaurus*), Gayal (*Bos frontalis*), Yak (*Bos grunniens*), American Bison (*Bison bison*), Wisent (*Bison bonasus*), and Buffalo (*Bubalus bubalis*). Taurine cattle postulated as pure (blue letters) and Tibetan cattle with estimated yak introgression for this segment (green letters).**



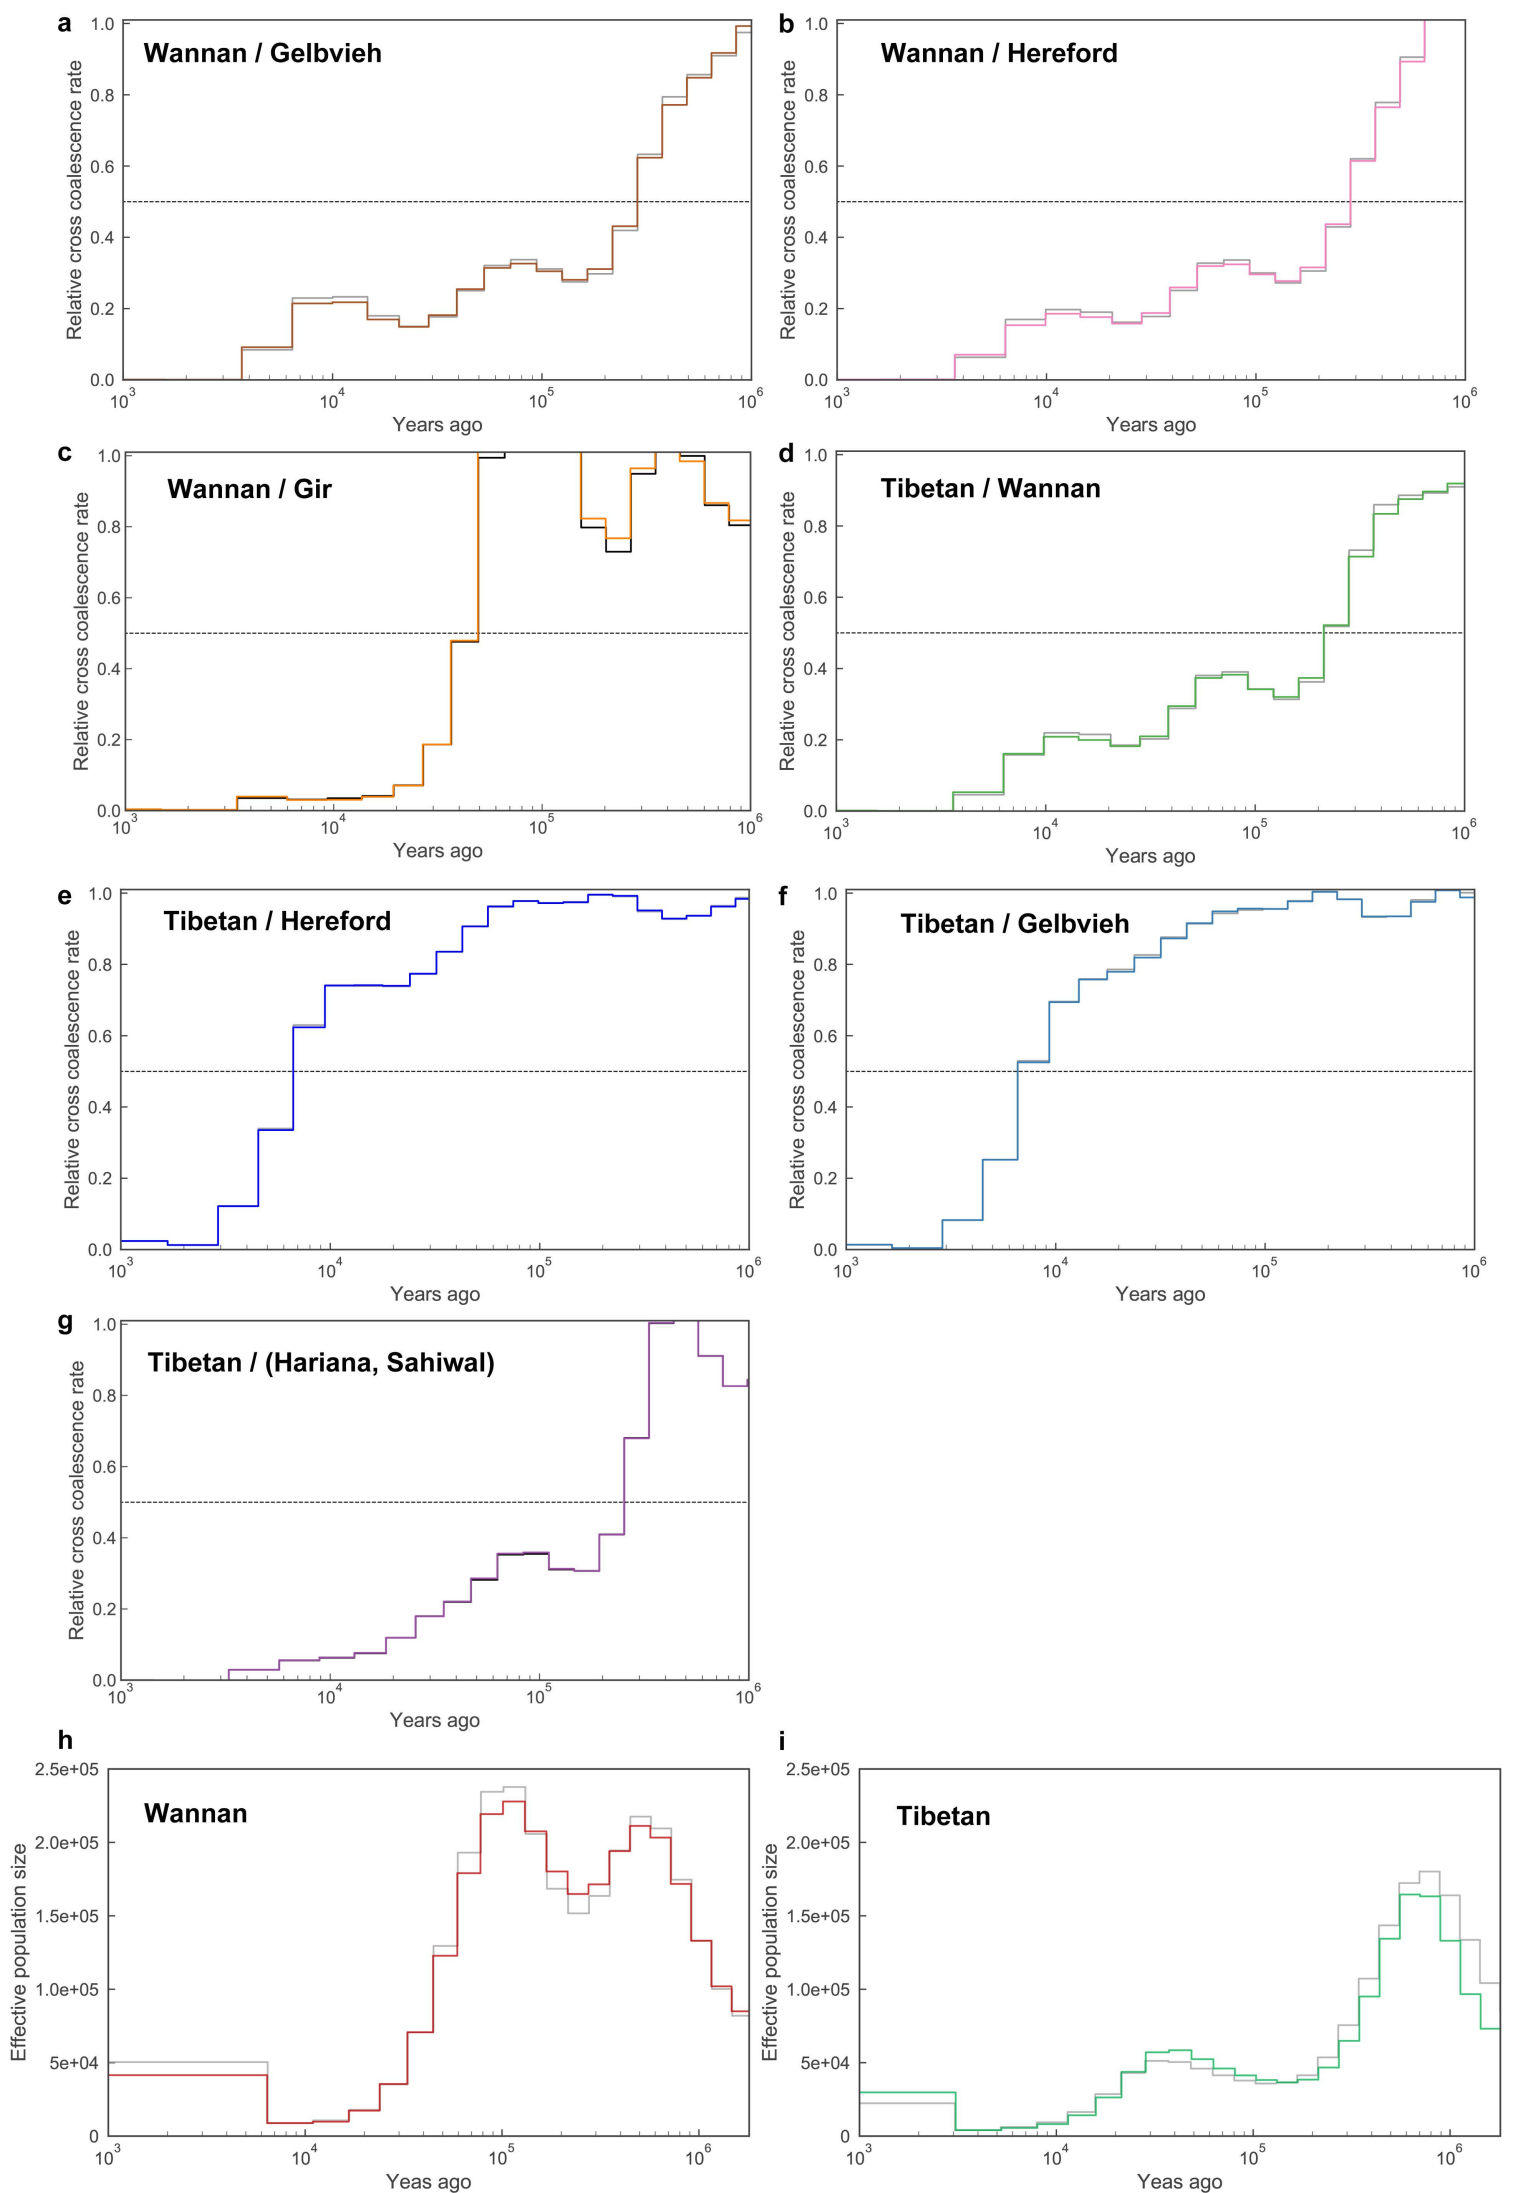

**Supplementary Figure 21. Impact of introgression on demographic history using MSMC.** We repeated the MSMC analysis using the same data but excluding the introgressed regions from banteng into two Chinese indicine cattle (~3.5%) and from yak into two Tibetan taurine cattle (~1.3%) (Supplementary Tables 20 and 26), respectively. The grey line in each picture represents the masked data. (a-g) Inferred relative cross coalescence rates between pairs of populations over time based on four haplotypes each from Hereford, Gelbvieh, Tibetan, Wannan, and Indian breeds (Haryana and Sahiwal). The x-axis shows time, and the y-axis shows a measure of similarity for each pair of compared populations. (h, i) Population size history inference based on four haplotypes each from high-coverage East Asian taurine (Tibetan) and Chinese indicine cattle (Wannan).

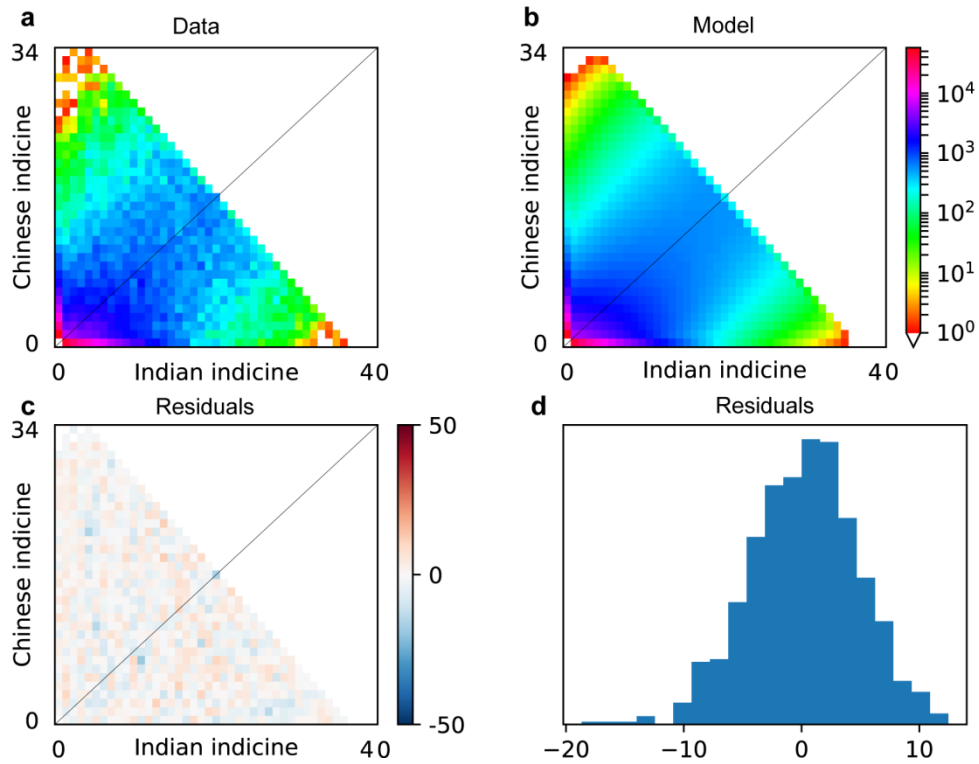

**Supplementary Figure 22. Comparisons of allele frequency spectra (AFS) between the modelled and real data of Chinese indicine and Indian indicine populations using  $\partial a \partial i$ . (a) Marginal AFS of the real data for each pair of populations. (b) AFS of the maximum-likelihood model simulation based on the real data. The residuals between the modelled and real data are shown in heat maps (c) and bar graphs (d).**

# Supplementary Tables

**Supplementary Table 1.** Overview of sample information and sequencing statistics

| Number | Sample ID <sup>#</sup> | Accession number | Country of origin | Species/Subspecies | Mapping rate | Mean depth (X) | Gender | BioProject  | Sample origin place             |
|--------|------------------------|------------------|-------------------|--------------------|--------------|----------------|--------|-------------|---------------------------------|
| 1      | Angus01                | SRR1525582       | United Kingdom    | <i>Bos taurus</i>  | 99.49%       | 7.14           | Male   | PRJNA256210 | Aberdeenshire, Scotland, UK     |
| 2      | Angus02                | SRR1525583       | United Kingdom    | <i>Bos taurus</i>  | 99.51%       | 7.45           | Male   | PRJNA256210 | Aberdeenshire, Scotland, UK     |
| 3      | Angus03                | SRR1525686       | United Kingdom    | <i>Bos taurus</i>  | 99.07%       | 6.67           | Male   | PRJNA256210 | Aberdeenshire, Scotland, UK     |
| 4      | Angus04                | SRR1525687       | United Kingdom    | <i>Bos taurus</i>  | 99.68%       | 6.70           | Male   | PRJNA256210 | Aberdeenshire, Scotland, UK     |
| 5      | Angus05                | SRR1525688       | United Kingdom    | <i>Bos taurus</i>  | 97.15%       | 7.25           | Male   | PRJNA256210 | Aberdeenshire, Scotland, UK     |
| 6      | Angus06                | SRR1355237       | United Kingdom    | <i>Bos taurus</i>  | 99.02%       | 15.16          | Male   | PRJNA176557 | Aberdeenshire, Scotland, UK     |
| 7      | Angus07                | SRR1365144       | United Kingdom    | <i>Bos taurus</i>  | 99.01%       | 17.91          | Male   | PRJNA176557 | Aberdeenshire, Scotland, UK     |
| 8      | Angus08                | SRR1425124       | United Kingdom    | <i>Bos taurus</i>  | 99.12%       | 18.52          | Male   | PRJNA176557 | Aberdeenshire, Scotland, UK     |
| 9      | Angus09                | SRR1365129       | United Kingdom    | <i>Bos taurus</i>  | 98.88%       | 16.92          | Male   | PRJNA176557 | Aberdeenshire, Scotland, UK     |
| 10     | Angus10                | SRR1346376       | United Kingdom    | <i>Bos taurus</i>  | 99.21%       | 13.92          | Male   | PRJNA176557 | Aberdeenshire, Scotland, UK     |
| 11     | Red Angus01            | SRR1525580       | United Kingdom    | <i>Bos taurus</i>  | 99.41%       | 9.52           | Male   | PRJNA256210 | Aberdeenshire, Scotland, UK     |
| 12     | Red Angus02            | SRR1525581       | United Kingdom    | <i>Bos taurus</i>  | 99.48%       | 7.45           | Male   | PRJNA256210 | Aberdeenshire, Scotland, UK     |
| 13     | Red Angus03            | SRR1525600       | United Kingdom    | <i>Bos taurus</i>  | 99.18%       | 7.02           | Male   | PRJNA256210 | Aberdeenshire, Scotland, UK     |
| 14     | Red Angus04            | SRR1525613       | United Kingdom    | <i>Bos taurus</i>  | 99.38%       | 6.71           | Male   | PRJNA256210 | Aberdeenshire, Scotland, UK     |
| 15     | Red Angus05            | SRR1525614       | United Kingdom    | <i>Bos taurus</i>  | 99.26%       | 7.31           | Male   | PRJNA256210 | Aberdeenshire, Scotland, UK     |
| 16     | Red Angus06            | SRR1343172       | United Kingdom    | <i>Bos taurus</i>  | 98.61%       | 14.39          | Male   | PRJNA176557 | Aberdeenshire, Scotland, UK     |
| 17     | Red Angus07            | SRR1355239       | United Kingdom    | <i>Bos taurus</i>  | 99.04%       | 15.42          | Male   | PRJNA176557 | Aberdeenshire, Scotland, UK     |
| 18     | Red Angus08            | SRR1365103       | United Kingdom    | <i>Bos taurus</i>  | 98.63%       | 16.57          | Male   | PRJNA176557 | Aberdeenshire, Scotland, UK     |
| 19     | Red Angus09            | SRR1365113       | United Kingdom    | <i>Bos taurus</i>  | 98.81%       | 14.93          | Male   | PRJNA176557 | Aberdeenshire, Scotland, UK     |
| 20     | Red Angus10            | SRR1425153       | United Kingdom    | <i>Bos taurus</i>  | 99.42%       | 18.08          | Male   | PRJNA176557 | Aberdeenshire, Scotland, UK     |
| 21     | Hereford01             | SRR1343160       | United Kingdom    | <i>Bos taurus</i>  | 98.01%       | 11.93          | Male   | PRJNA176557 | Hereford, UK                    |
| 22     | Hereford02             | SRR1346382       | United Kingdom    | <i>Bos taurus</i>  | 94.77%       | 11.57          | Male   | PRJNA176557 | Hereford, UK                    |
| 23     | Hereford03             | SRR1346383       | United Kingdom    | <i>Bos taurus</i>  | 98.59%       | 11.63          | Male   | PRJNA176557 | Hereford, UK                    |
| 24     | Hereford04             | SRR1346385       | United Kingdom    | <i>Bos taurus</i>  | 98.68%       | 12.32          | Male   | PRJNA176557 | Hereford, UK                    |
| 25     | Hereford05             | SRR1346387       | United Kingdom    | <i>Bos taurus</i>  | 98.90%       | 12.72          | Male   | PRJNA176557 | Hereford, UK                    |
| 26     | Hereford06             | SRR1365124       | United Kingdom    | <i>Bos taurus</i>  | 98.95%       | 16.12          | Male   | PRJNA176557 | Hereford, UK                    |
| 27     | Hereford07             | SRR1365126       | United Kingdom    | <i>Bos taurus</i>  | 99.22%       | 17.34          | Male   | PRJNA176557 | Hereford, UK                    |
| 28     | Hereford08             | SRR1365128       | United Kingdom    | <i>Bos taurus</i>  | 99.20%       | 16.40          | Male   | PRJNA176557 | Hereford, UK                    |
| 29     | Hereford09             | SRR1365131       | United Kingdom    | <i>Bos taurus</i>  | 98.91%       | 16.75          | Male   | PRJNA176557 | Hereford, UK                    |
| 30     | Hereford10             | SRR1365137       | United Kingdom    | <i>Bos taurus</i>  | 98.66%       | 14.54          | Male   | PRJNA176557 | Hereford, UK                    |
| 31     | Devon                  | SRR1346378       | United Kingdom    | <i>Bos taurus</i>  | 99.11%       | 13.57          | Male   | PRJNA176557 | Cork, UK                        |
| 32     | Salers                 | SRR1525608       | France            | <i>Bos taurus</i>  | 99.40%       | 7.17           | Male   | PRJNA256210 | Auvergne, Franch                |
| 33     | Charolais01            | SRR1343167       | France            | <i>Bos taurus</i>  | 96.55%       | 17.70          | Male   | PRJNA176557 | Charolais, France               |
| 34     | Charolais02            | SRR1343168       | France            | <i>Bos taurus</i>  | 98.50%       | 13.62          | Male   | PRJNA176557 | Charolais, France               |
| 35     | Charolais03            | SRR1343169       | France            | <i>Bos taurus</i>  | 98.44%       | 11.60          | Male   | PRJNA176557 | Charolais, France               |
| 36     | Charolais04            | SRR1348571       | France            | <i>Bos taurus</i>  | 99.27%       | 16.62          | Male   | PRJNA176557 | Charolais, France               |
| 37     | Charolais05            | SRR1355258       | France            | <i>Bos taurus</i>  | 98.06%       | 17.57          | Male   | PRJNA176557 | Charolais, France               |
| 38     | Charolais06            | SRR1365122       | France            | <i>Bos taurus</i>  | 99.02%       | 15.87          | Male   | PRJNA176557 | Charolais, France               |
| 39     | Limousin               | SRR1365134       | France            | <i>Bos taurus</i>  | 98.47%       | 13.95          | Male   | PRJNA176557 | Limousin, France                |
| 40     | Maine Anjou01          | SRR1355238       | France            | <i>Bos taurus</i>  | 98.73%       | 14.15          | Male   | PRJNA176557 | Lyon, France                    |
| 41     | Maine Anjou02          | SRR1355245       | France            | <i>Bos taurus</i>  | 99.37%       | 15.06          | Male   | PRJNA176557 | Lyon, France                    |
| 42     | Maine Anjou03          | SRR1355259       | France            | <i>Bos taurus</i>  | 95.23%       | 17.91          | Male   | PRJNA176557 | Lyon, France                    |
| 43     | Maine Anjou04          | SRR1365125       | France            | <i>Bos taurus</i>  | 91.94%       | 15.72          | Male   | PRJNA176557 | Lyon, France                    |
| 44     | Maine Anjou05          | SRR1365127       | France            | <i>Bos taurus</i>  | 99.03%       | 16.34          | Male   | PRJNA176557 | Lyon, France                    |
| 45     | Maine Anjou06          | SRR1365130       | France            | <i>Bos taurus</i>  | 99.16%       | 17.55          | Male   | PRJNA176557 | Lyon, France                    |
| 46     | Piedmontese01          | SRR1525596       | Italy             | <i>Bos taurus</i>  | 99.43%       | 8.22           | Male   | PRJNA256210 | Piedmontese, Italy              |
| 47     | Piedmontese02          | SRR1525599       | Italy             | <i>Bos taurus</i>  | 99.47%       | 6.40           | Male   | PRJNA256210 | Piedmontese, Italy              |
| 48     | Piedmontese03          | SRR1525603       | Italy             | <i>Bos taurus</i>  | 99.39%       | 7.81           | Male   | PRJNA256210 | Piedmontese, Italy              |
| 49     | Piedmontese04          | SRR1525604       | Italy             | <i>Bos taurus</i>  | 99.48%       | 6.89           | Male   | PRJNA256210 | Piedmontese, Italy              |
| 50     | Piedmontese05          | SRR1525606       | Italy             | <i>Bos taurus</i>  | 99.46%       | 8.34           | Male   | PRJNA256210 | Piedmontese, Italy              |
| 51     | Gelbvieh01             | SRR1343161       | Germany           | <i>Bos taurus</i>  | 98.36%       | 12.85          | Male   | PRJNA176557 | München, Bavaria, Germany       |
| 52     | Gelbvieh02             | SRR1343162       | Germany           | <i>Bos taurus</i>  | 97.00%       | 13.32          | Male   | PRJNA176557 | München, Bavaria, Germany       |
| 53     | Gelbvieh03             | SRR1343164       | Germany           | <i>Bos taurus</i>  | 94.55%       | 15.72          | Male   | PRJNA176557 | München, Bavaria, Germany       |
| 54     | Gelbvieh04             | SRR1343165       | Germany           | <i>Bos taurus</i>  | 98.58%       | 25.26          | Male   | PRJNA176557 | München, Bavaria, Germany       |
| 55     | Gelbvieh05             | SRR1343166       | Germany           | <i>Bos taurus</i>  | 98.78%       | 10.66          | Male   | PRJNA176557 | München, Bavaria, Germany       |
| 56     | Gelbvieh06             | SRR1365112       | Germany           | <i>Bos taurus</i>  | 99.14%       | 15.28          | Male   | PRJNA176557 | München, Bavaria, Germany       |
| 57     | Gelbvieh07             | SRR1425154       | Germany           | <i>Bos taurus</i>  | 99.33%       | 17.67          | Male   | PRJNA176557 | München, Bavaria, Germany       |
| 58     | Gelbvieh08             | SRR1355236       | Germany           | <i>Bos taurus</i>  | 95.64%       | 15.02          | Male   | PRJNA176557 | München, Bavaria, Germany       |
| 59     | Gelbvieh09             | SRR1355240       | Germany           | <i>Bos taurus</i>  | 98.00%       | 15.08          | Male   | PRJNA176557 | München, Bavaria, Germany       |
| 60     | Gelbvieh10             | SRR1355260       | Germany           | <i>Bos taurus</i>  | 99.08%       | 18.99          | Male   | PRJNA176557 | München, Bavaria, Germany       |
| 61     | Simmental01            | SRR1525617       | Switzerland       | <i>Bos taurus</i>  | 98.93%       | 14.90          | Male   | PRJNA256210 | Geneve, Switzerland             |
| 62     | Simmental02            | SRR1525618       | Switzerland       | <i>Bos taurus</i>  | 98.84%       | 13.33          | Male   | PRJNA256210 | Geneve, Switzerland             |
| 63     | Simmental03            | SRR1525619       | Switzerland       | <i>Bos taurus</i>  | 97.34%       | 13.70          | Male   | PRJNA256210 | Geneve, Switzerland             |
| 64     | Simmental04            | SRR1525620       | Switzerland       | <i>Bos taurus</i>  | 99.02%       | 14.80          | Male   | PRJNA256210 | Geneve, Switzerland             |
| 65     | Simmental05            | SRR1525621       | Switzerland       | <i>Bos taurus</i>  | 98.31%       | 13.16          | Male   | PRJNA256210 | Geneve, Switzerland             |
| 66     | Simmental06            | SRR1525700       | Switzerland       | <i>Bos taurus</i>  | 98.91%       | 14.33          | Male   | PRJNA256210 | Geneve, Switzerland             |
| 67     | Simmental07            | SRR1525701       | Switzerland       | <i>Bos taurus</i>  | 98.80%       | 14.39          | Male   | PRJNA256210 | Geneve, Switzerland             |
| 68     | Simmental08            | SRR1525702       | Switzerland       | <i>Bos taurus</i>  | 99.19%       | 15.14          | Male   | PRJNA256210 | Geneve, Switzerland             |
| 69     | Simmental09            | SRR1525703       | Switzerland       | <i>Bos taurus</i>  | 93.80%       | 17.25          | Male   | PRJNA256210 | Geneve, Switzerland             |
| 70     | Simmental10            | SRR1525705       | Switzerland       | <i>Bos taurus</i>  | 98.78%       | 15.41          | Male   | PRJNA256210 | Geneve, Switzerland             |
| 71     | Jersey01               | SRR2016774       | Channel Islands   | <i>Bos taurus</i>  | 99.74%       | 7.74           | Male   | PRJNA277147 | Channel Island of Jersey, UK    |
| 72     | Jersey02               | SRR2016776       | Channel Islands   | <i>Bos taurus</i>  | 99.70%       | 9.89           | Male   | PRJNA277147 | Channel Island of Jersey, UK    |
| 73     | Jersey03               | SRR2016799       | Channel Islands   | <i>Bos taurus</i>  | 99.84%       | 3.92           | Male   | PRJNA277147 | Channel Island of Jersey, UK    |
| 74     | Holstein01             | SRR1346386       | Netherlands       | <i>Bos taurus</i>  | 99.17%       | 13.28          | Male   | PRJNA176557 | De Kooy, North Holland, Holland |
| 75     | Holstein02             | SRR1346390       | Netherlands       | <i>Bos taurus</i>  | 99.12%       | 12.74          | Male   | PRJNA176557 | De Kooy, North Holland, Holland |
| 76     | Holstein03             | SRR1346392       | Netherlands       | <i>Bos taurus</i>  | 98.75%       | 10.44          | Male   | PRJNA176557 | De Kooy, North Holland, Holland |
| 77     | Holstein04             | SRR1348583       | Netherlands       | <i>Bos taurus</i>  | 99.03%       | 24.35          | Male   | PRJNA176557 | De Kooy, North Holland, Holland |
| 78     | Holstein05             | SRR1348592       | Netherlands       | <i>Bos taurus</i>  | 99.65%       | 13.75          | Male   | PRJNA176557 | De Kooy, North Holland, Holland |
| 79     | Holstein06             | SRR1365147       | Netherlands       | <i>Bos taurus</i>  | 98.49%       | 18.44          | Male   | PRJNA176557 | De Kooy, North Holland, Holland |
| 80     | Holstein07             | SRR1425129       | Netherlands       | <i>Bos taurus</i>  | 99.06%       | 17.19          | Male   | PRJNA176557 | De Kooy, North Holland, Holland |
| 81     | Holstein08             | SRR1425133       | Netherlands       | <i>Bos taurus</i>  | 98.95%       | 17.27          | Male   | PRJNA176557 | De Kooy, North Holland, Holland |
| 82     | Holstein09             | SRR1425134       | Netherlands       | <i>Bos taurus</i>  | 99.02%       | 17.03          | Male   | PRJNA176557 | De Kooy, North Holland, Holland |
| 83     | Holstein10             | SRR1425144       | Netherlands       | <i>Bos taurus</i>  | 99.05%       | 17.19          | Male   | PRJNA176557 | De Kooy, North Holland, Holland |
| 84     | Rashoki01              | ERR454987        | Iran              | <i>Bos taurus</i>  | 99.89%       | 14.08          | Female | PRJEB5462   | Sanandaj, Iran                  |
| 85     | Rashoki02              | ERR454988        | Iran              | <i>Bos taurus</i>  | 99.90%       | 12.63          | Female | PRJEB5462   | Divandare, Iran                 |
| 86     | Rashoki03              | ERR454989        | Iran              | <i>Bos taurus</i>  | 99.91%       | 13.94          | Female | PRJEB5462   | Marivan, Iran                   |
| 87     | Rashoki04              | ERR454991        | Iran              | <i>Bos taurus</i>  | 99.75%       | 16.58          | Female | PRJEB5462   | Divandar, Iran                  |
| 88     | Rashoki05              | ERR454992        | Iran              | <i>Bos taurus</i>  | 99.86%       | 14.63          | Female | PRJEB5462   | Sanandaj, Iran                  |
| 89     | Rashoki06              | ERR454993        | Iran              | <i>Bos taurus</i>  | 99.91%       | 12.34          | Female | PRJEB5462   | Marivan, Iran                   |
| 90     | Rashoki07              | ERR454994        | Iran              | <i>Bos taurus</i>  | 99.90%       | 13.87          | Female | PRJEB5462   | Marivan, Iran                   |
| 91     | Rashoki08              | ERR454990        | Iran              | <i>Bos taurus</i>  | 99.89%       | 13.60          | Female | PRJEB5462   | Marivan, Iran                   |

|     |               |                        |       |                                 |        |       |        |             |                                     |
|-----|---------------|------------------------|-------|---------------------------------|--------|-------|--------|-------------|-------------------------------------|
| 92  | Hanwoo01      | SRR934415              | Korea | <i>Bos taurus</i>               | 99.44% | 14.35 | Male   | PRJNA210519 | Chuncheon, Kangwon-do, Korea        |
| 93  | Hanwoo02      | SRR934417              | Korea | <i>Bos taurus</i>               | 99.38% | 14.24 | Male   | PRJNA210519 | Chuncheon, Kangwon-do, Korea        |
| 94  | Hanwoo03      | SRR934418              | Korea | <i>Bos taurus</i>               | 99.34% | 15.00 | Male   | PRJNA210519 | Chuncheon, Kangwon-do, Korea        |
| 95  | Hanwoo04      | SRR934419              | Korea | <i>Bos taurus</i>               | 99.43% | 13.89 | Male   | PRJNA210519 | Chuncheon, Kangwon-do, Korea        |
| 96  | Hanwoo05      | SRR934432              | Korea | <i>Bos taurus</i>               | 99.46% | 15.02 | Male   | PRJNA210519 | Chuncheon, Kangwon-do, Korea        |
| 97  | Hanwoo06      | SRR934433              | Korea | <i>Bos taurus</i>               | 98.71% | 13.49 | Male   | PRJNA210519 | Chuncheon, Kangwon-do, Korea        |
| 98  | Hanwoo07      | SRR934434              | Korea | <i>Bos taurus</i>               | 99.45% | 13.75 | Male   | PRJNA210519 | Chuncheon, Kangwon-do, Korea        |
| 99  | Hanwoo08      | SRR934435              | Korea | <i>Bos taurus</i>               | 99.49% | 12.44 | Male   | PRJNA210519 | Chuncheon, Kangwon-do, Korea        |
| 100 | Hanwoo09      | SRR934436              | Korea | <i>Bos taurus</i>               | 99.39% | 12.36 | Male   | PRJNA210519 | Chuncheon, Kangwon-do, Korea        |
| 101 | Hanwoo10      | SRR934437              | Korea | <i>Bos taurus</i>               | 99.48% | 12.82 | Male   | PRJNA210519 | Chuncheon, Kangwon-do, Korea        |
| 102 | Hanwoo11      | SRR934395              | Korea | <i>Bos taurus</i>               | 99.31% | 10.03 | Female | PRJNA210523 | Chuncheon, Kangwon-do, Korea        |
| 103 | Hanwoo12      | SRR934397              | Korea | <i>Bos taurus</i>               | 99.32% | 8.69  | Female | PRJNA210523 | Chuncheon, Kangwon-do, Korea        |
| 104 | Hanwoo13      | SRR934398              | Korea | <i>Bos taurus</i>               | 99.11% | 10.68 | Female | PRJNA210523 | Chuncheon, Kangwon-do, Korea        |
| 105 | Hanwoo14      | SRR934400              | Korea | <i>Bos taurus</i>               | 99.44% | 13.33 | Female | PRJNA210523 | Chuncheon, Kangwon-do, Korea        |
| 106 | Hanwoo15      | SRR934401              | Korea | <i>Bos taurus</i>               | 99.52% | 14.63 | Female | PRJNA210523 | Chuncheon, Kangwon-do, Korea        |
| 107 | Hanwoo16      | SRR934402              | Korea | <i>Bos taurus</i>               | 98.68% | 12.00 | Female | PRJNA210523 | Chuncheon, Kangwon-do, Korea        |
| 108 | Hanwoo17      | SRR934403              | Korea | <i>Bos taurus</i>               | 99.24% | 10.76 | Female | PRJNA210523 | Chuncheon, Kangwon-do, Korea        |
| 109 | Hanwoo18      | SRR934404              | Korea | <i>Bos taurus</i>               | 99.45% | 12.63 | Female | PRJNA210523 | Chuncheon, Kangwon-do, Korea        |
| 110 | Kuchinoshima  | DRR000429-32           | Japan | <i>Bos taurus</i>               | 95.75% | 23.22 | Male   | PRJDA48395  | Kuchinoshima, Japan                 |
| 111 | Mishima01     | DRR001771,78,81        | Japan | <i>Bos taurus</i>               | 94.24% | 13.73 | Male   | PRJDB2660   | Mishima Island, Japan               |
| 112 | Mishima02     | DRR001768,75,82        | Japan | <i>Bos taurus</i>               | 94.27% | 14.10 | Female | PRJDB2661   | Mishima Island, Japan               |
| 113 | Mishima03     | DRR001763,65           | Japan | <i>Bos taurus</i>               | 77.53% | 18.79 | Female | PRJDB2662   | Mishima Island, Japan               |
| 114 | Mishima04     | DRR001770,77,80        | Japan | <i>Bos taurus</i>               | 94.15% | 14.98 | Female | PRJDB2663   | Mishima Island, Japan               |
| 115 | Mishima05     | DRR001762,72,74        | Japan | <i>Bos taurus</i>               | 85.66% | 19.24 | Female | PRJDB2665   | Mishima Island, Japan               |
| 116 | Mishima06     | DRR001769,76,79        | Japan | <i>Bos taurus</i>               | 94.44% | 16.45 | Female | PRJDB2666   | Mishima Island, Japan               |
| 117 | Mishima07     | DRR001764,66           | Japan | <i>Bos taurus</i>               | 85.23% | 16.17 | Female | PRJDB2667   | Mishima Island, Japan               |
| 118 | Yanbian       | SRR5507273             | China | <i>Bos taurus</i>               | 99.65% | 10.64 | Female | PRJNA379859 | Yanbian, Jilin, China               |
| 119 | Chaidamu01    | SRR5507272             | China | <i>Bos taurus</i>               | 99.68% | 12.23 | Male   | PRJNA379859 | Geermu, Haixi, Qinghai, China       |
| 120 | Chaidamu02    | SRR5507271             | China | <i>Bos taurus</i>               | 99.67% | 10.14 | Male   | PRJNA379859 | Geermu, Haixi, Qinghai, China       |
| 121 | Chaidamu03    | SRR5507270             | China | <i>Bos taurus</i>               | 99.38% | 11.51 | Male   | PRJNA379859 | Geermu, Haixi, Qinghai, China       |
| 122 | Chaidamu04    | SRR5507269             | China | <i>Bos taurus</i>               | 99.80% | 13.38 | Male   | PRJNA379859 | Geermu, Haixi, Qinghai, China       |
| 123 | Chaidamu05    | SRR5507268             | China | <i>Bos taurus</i>               | 99.80% | 10.65 | Male   | PRJNA379859 | Geermu, Haixi, Qinghai, China       |
| 124 | Mongolian01   | SRR5507267             | China | <i>Bos taurus</i>               | 99.81% | 11.72 | Male   | PRJNA379859 | Kuerl, Bayingolin, Xinjiang, China  |
| 125 | Mongolian02   | SRR5507266             | China | <i>Bos taurus</i>               | 99.71% | 11.88 | Male   | PRJNA379859 | Kuerl, Bayingolin, Xinjiang, China  |
| 126 | Mongolian03   | SRR5507265             | China | <i>Bos taurus</i>               | 99.70% | 13.07 | Male   | PRJNA379859 | Kuerl, Bayingolin, Xinjiang, China  |
| 127 | Mongolian04   | SRR5507264             | China | <i>Bos taurus</i>               | 99.76% | 12.42 | Male   | PRJNA379859 | Kuerl, Bayingolin, Xinjiang, China  |
| 128 | Mongolian05   | SRR5507263             | China | <i>Bos taurus</i>               | 99.77% | 12.48 | Male   | PRJNA379859 | Kuerl, Bayingolin, Xinjiang, China  |
| 129 | Mongolian06   | SRR5507262             | China | <i>Bos taurus</i>               | 99.74% | 12.57 | Male   | PRJNA379859 | Kuerl, Bayingolin, Xinjiang, China  |
| 130 | Mongolian07   | SRR5507261             | China | <i>Bos taurus</i>               | 99.75% | 11.11 | Male   | PRJNA379859 | Kuerl, Bayingolin, Xinjiang, China  |
| 131 | Kazakh01      | SRR5507260             | China | <i>Bos taurus</i>               | 99.78% | 13.11 | Male   | PRJNA379859 | Yining, Yili, Xinjing, China        |
| 132 | Kazakh02      | SRR5507259             | China | <i>Bos taurus</i>               | 99.79% | 12.18 | Male   | PRJNA379859 | Yining, Yili, Xinjing, China        |
| 133 | Kazakh03      | SRR5507258             | China | <i>Bos taurus</i>               | 99.83% | 12.80 | Male   | PRJNA379859 | Yining, Yili, Xinjing, China        |
| 134 | Kazakh04      | SRR5507257             | China | <i>Bos taurus</i>               | 99.84% | 9.04  | Male   | PRJNA379859 | Yining, Yili, Xinjing, China        |
| 135 | Kazakh05      | SRR5507256             | China | <i>Bos taurus</i>               | 99.77% | 12.14 | Male   | PRJNA379859 | Yining, Yili, Xinjing, China        |
| 136 | Kazakh06      | SRR5507255             | China | <i>Bos taurus</i>               | 99.56% | 11.01 | Male   | PRJNA379859 | Yining, Yili, Xinjing, China        |
| 137 | Kazakh07      | SRR5507254             | China | <i>Bos taurus</i>               | 99.81% | 10.50 | Male   | PRJNA379859 | Yining, Yili, Xinjing, China        |
| 138 | Kazakh08      | SRR5507253             | China | <i>Bos taurus</i>               | 99.79% | 11.95 | Male   | PRJNA379859 | Yining, Yili, Xinjing, China        |
| 139 | Kazakh09      | SRR5507252             | China | <i>Bos taurus</i>               | 99.57% | 10.40 | Male   | PRJNA379859 | Yining, Yili, Xinjing, China        |
| 140 | Tibetan01     | SRR5507251             | China | <i>Bos taurus</i>               | 99.78% | 11.27 | Male   | PRJNA379859 | Changdu, Xizang, China              |
| 141 | Tibetan02     | SRR5507250             | China | <i>Bos taurus</i>               | 99.75% | 11.30 | Male   | PRJNA379859 | Changdu, Xizang, China              |
| 142 | Tibetan03     | SRR6024571, SRR5507249 | China | <i>Bos taurus</i>               | 99.84% | 27.06 | Male   | PRJNA379859 | Changdu, Xizang, China              |
| 143 | Tibetan04     | SRR6024572, SRR5507248 | China | <i>Bos taurus</i>               | 99.03% | 25.36 | Male   | PRJNA379859 | Changdu, Xizang, China              |
| 144 | Tibetan05     | SRR5507247             | China | <i>Bos taurus</i>               | 99.85% | 11.36 | Male   | PRJNA379859 | Changdu, Xizang, China              |
| 145 | Tibetan06     | SRR5507246             | China | <i>Bos taurus</i>               | 98.45% | 10.58 | Male   | PRJNA379859 | Changdu, Xizang, China              |
| 146 | Tibetan07     | SRR5507245             | China | <i>Bos taurus</i>               | 99.84% | 11.19 | Male   | PRJNA379859 | Changdu, Xizang, China              |
| 147 | Tibetan08     | SRR5507244             | China | <i>Bos taurus</i>               | 99.82% | 11.42 | Male   | PRJNA379859 | Changdu, Xizang, China              |
| 148 | Tibetan09     | SRR5507243             | China | <i>Bos taurus</i>               | 99.84% | 14.20 | Male   | PRJNA379859 | Changdu, Xizang, China              |
| 149 | Luxi01        | SRR5507242             | China | <i>Bos taurus x Bos indicus</i> | 99.73% | 11.75 | Male   | PRJNA379859 | Jining, Shandong, China             |
| 150 | Luxi02        | SRR5507241             | China | <i>Bos taurus x Bos indicus</i> | 99.47% | 10.81 | Male   | PRJNA379859 | Jining, Shandong, China             |
| 151 | Luxi03        | SRR5507240             | China | <i>Bos taurus x Bos indicus</i> | 99.50% | 9.61  | Male   | PRJNA379859 | Jining, Shandong, China             |
| 152 | Luxi04        | SRR5507239             | China | <i>Bos taurus x Bos indicus</i> | 99.48% | 9.10  | Male   | PRJNA379859 | Jining, Shandong, China             |
| 153 | Luxi05        | SRR5507238             | China | <i>Bos taurus x Bos indicus</i> | 99.62% | 11.06 | Male   | PRJNA379859 | Jining, Shandong, China             |
| 154 | Nanyang01     | SRR5507237             | China | <i>Bos taurus x Bos indicus</i> | 99.26% | 10.16 | Female | PRJNA379859 | Nanyang, Henan, China               |
| 155 | Nanyang02     | SRR5507236             | China | <i>Bos taurus x Bos indicus</i> | 99.70% | 9.75  | Male   | PRJNA379859 | Nanyang, Henan, China               |
| 156 | Nanyang03     | SRR5507235             | China | <i>Bos taurus x Bos indicus</i> | 99.62% | 10.87 | Male   | PRJNA379859 | Nanyang, Henan, China               |
| 157 | Nanyang04     | SRR5507234             | China | <i>Bos taurus x Bos indicus</i> | 99.23% | 10.49 | Male   | PRJNA379859 | Nanyang, Henan, China               |
| 158 | Nanyang05     | SRR5507233             | China | <i>Bos taurus x Bos indicus</i> | 99.72% | 10.61 | Male   | PRJNA379859 | Nanyang, Henan, China               |
| 159 | Jiaxian Red01 | SRR5507232             | China | <i>Bos taurus x Bos indicus</i> | 98.92% | 12.36 | Male   | PRJNA379859 | Jiaxian, Pingdingshan, Henan, China |
| 160 | Jiaxian Red02 | SRR5507231             | China | <i>Bos taurus x Bos indicus</i> | 99.78% | 12.69 | Male   | PRJNA379859 | Jiaxian, Pingdingshan, Henan, China |
| 161 | Jiaxian Red03 | SRR5507230             | China | <i>Bos taurus x Bos indicus</i> | 99.82% | 12.08 | Male   | PRJNA379859 | Jiaxian, Pingdingshan, Henan, China |
| 162 | Jiaxian Red04 | SRR5507229             | China | <i>Bos taurus x Bos indicus</i> | 99.81% | 14.38 | Male   | PRJNA379859 | Jiaxian, Pingdingshan, Henan, China |
| 163 | Jiaxian Red05 | SRR5507228             | China | <i>Bos taurus x Bos indicus</i> | 97.73% | 12.08 | Male   | PRJNA379859 | Jiaxian, Pingdingshan, Henan, China |
| 164 | Bohai Black01 | SRR5507227             | China | <i>Bos taurus x Bos indicus</i> | 99.78% | 10.09 | Male   | PRJNA379859 | Binzhou, Shandong, China            |
| 165 | Bohai Black02 | SRR5507226             | China | <i>Bos taurus x Bos indicus</i> | 99.75% | 10.25 | Male   | PRJNA379859 | Binzhou, Shandong, China            |
| 166 | Bohai Black03 | SRR5507225             | China | <i>Bos taurus x Bos indicus</i> | 99.81% | 11.45 | Male   | PRJNA379859 | Binzhou, Shandong, China            |
| 167 | Bohai Black04 | SRR5507224             | China | <i>Bos taurus x Bos indicus</i> | 99.80% | 11.11 | Male   | PRJNA379859 | Binzhou, Shandong, China            |
| 168 | Bohai Black05 | SRR5507223             | China | <i>Bos taurus x Bos indicus</i> | 87.22% | 9.93  | Female | PRJNA379859 | Binzhou, Shandong, China            |
| 169 | Lingnan01     | SRR5507222             | China | <i>Bos taurus x Bos indicus</i> | 99.73% | 11.39 | Male   | PRJNA379859 | Shangluo, Shanxi, China             |
| 170 | Lingnan02     | SRR5507221             | China | <i>Bos taurus x Bos indicus</i> | 99.65% | 9.08  | Male   | PRJNA379859 | Shangluo, Shanxi, China             |
| 171 | Lingnan03     | SRR5507220             | China | <i>Bos taurus x Bos indicus</i> | 99.62% | 10.87 | Male   | PRJNA379859 | Shangluo, Shanxi, China             |
| 172 | Lingnan04     | SRR5507219             | China | <i>Bos taurus x Bos indicus</i> | 99.71% | 10.91 | Male   | PRJNA379859 | Shangluo, Shanxi, China             |
| 173 | Lingnan05     | SRR5507218             | China | <i>Bos taurus x Bos indicus</i> | 99.67% | 9.51  | Male   | PRJNA379859 | Shangluo, Shanxi, China             |
| 174 | Lingnan06     | SRR5507217             | China | <i>Bos taurus x Bos indicus</i> | 99.61% | 9.53  | Male   | PRJNA379859 | Shangluo, Shanxi, China             |
| 175 | Lingnan07     | SRR5507216             | China | <i>Bos taurus x Bos indicus</i> | 99.62% | 11.01 | Male   | PRJNA379859 | Shangluo, Shanxi, China             |
| 176 | Lingnan08     | SRR5507215             | China | <i>Bos taurus x Bos indicus</i> | 99.34% | 10.74 | Male   | PRJNA379859 | Shangluo, Shanxi, China             |
| 177 | Zaobei01      | SRR5507214             | China | <i>Bos taurus x Bos indicus</i> | 99.66% | 11.37 | Male   | PRJNA379859 | Zaoyang, Xiangyang, Hubei, China    |
| 178 | Zaobei02      | SRR5507213             | China | <i>Bos taurus x Bos indicus</i> | 99.40% | 9.98  | Male   | PRJNA379859 | Zaoyang, Xiangyang, Hubei, China    |
| 179 | Zaobei03      | SRR5507212             | China | <i>Bos taurus x Bos indicus</i> | 99.54% | 11.12 | Male   | PRJNA379859 | Zaoyang, Xiangyang, Hubei, China    |
| 180 | Zaobei04      | SRR5507211             | China | <i>Bos taurus x Bos indicus</i> | 99.73% | 10.37 | Male   | PRJNA379859 | Zaoyang, Xiangyang, Hubei, China    |
| 181 | Zaobei05      | SRR5507210             | China | <i>Bos taurus x Bos indicus</i> | 99.82% | 11.31 | Male   | PRJNA379859 | Zaoyang, Xiangyang, Hubei, China    |
| 182 | Bashan01      | SRR5507209             | China | <i>Bos taurus x Bos indicus</i> | 99.81% | 11.52 | Male   | PRJNA379859 | Xuanhan, Dazhou, Sichuan, China     |
| 183 | Bashan02      | SRR5507208             | China | <i>Bos taurus x Bos indicus</i> | 99.78% | 10.63 | Male   | PRJNA379859 | Xuanhan, Dazhou, Sichuan, China     |
| 184 | Bashan03      | SRR5507207             | China | <i>Bos taurus x Bos indicus</i> | 99.77% | 12.21 | Male   | PRJNA379859 | Xixiang, Hanzhong, Shaanxi, China   |
| 185 | Bashan04      | SRR5507206             | China | <i>Bos taurus x Bos indicus</i> | 99.73% | 10.19 | Male   | PRJNA379859 | Xixiang, Hanzhong, Shaanxi, China   |
| 186 | Bashan05      | SRR5507205             | China | <i>Bos taurus x Bos indicus</i> | 99.72% | 11.57 | Male   | PRJNA379859 | Xixiang, Hanzhong, Shaanxi, China   |
| 187 | Wandong01     | SRR5507192             | China | <i>Bos taurus x Bos indicus</i> | 99.09% | 9.35  | Male   | PRJNA379859 | Weining, Bijie, Guizhou, China      |

|     |                  |                                  |                           |                                 |        |       |        |             |                                             |
|-----|------------------|----------------------------------|---------------------------|---------------------------------|--------|-------|--------|-------------|---------------------------------------------|
| 188 | Wandong02        | SRR5507191                       | China                     | <i>Bos taurus x Bos indicus</i> | 99.64% | 12.60 | Male   | PRJNA379859 | Weining, Bijie, Guizhou, China              |
| 189 | Dabieshan01      | SRR5507194                       | China                     | <i>Bos taurus x Bos indicus</i> | 99.04% | 10.32 | Male   | PRJNA379859 | Jixi, Anhui, China                          |
| 190 | Dabieshan02      | SRR5507193                       | China                     | <i>Bos taurus x Bos indicus</i> | 97.66% | 8.87  | Male   | PRJNA379859 | Jixi, Anhui, China                          |
| 191 | Weining01        | SRR5507204                       | China                     | <i>Bos taurus x Bos indicus</i> | 96.72% | 9.06  | Male   | PRJNA379859 | Weining, Bijie, Guizhou, China              |
| 192 | Weining02        | SRR5507203                       | China                     | <i>Bos taurus x Bos indicus</i> | 99.14% | 9.71  | Male   | PRJNA379859 | Weining, Bijie, Guizhou, China              |
| 193 | Weining03        | SRR5507202                       | China                     | <i>Bos taurus x Bos indicus</i> | 99.11% | 11.47 | Male   | PRJNA379859 | Weining, Bijie, Guizhou, China              |
| 194 | Weining04        | SRR5507201                       | China                     | <i>Bos taurus x Bos indicus</i> | 99.09% | 9.85  | Male   | PRJNA379859 | Jixi, Anhui, China                          |
| 195 | Weining05        | SRR5507200                       | China                     | <i>Bos taurus x Bos indicus</i> | 99.28% | 10.25 | Male   | PRJNA379859 | Jixi, Anhui, China                          |
| 196 | Dianzhong01      | SRR6024567                       | China                     | <i>Bos indicus</i>              | 99.38% | 9.08  | Female | PRJNA379859 | Jiangcheng, Puer, Yunnan, China             |
| 197 | Dianzhong02      | SRR6024568                       | China                     | <i>Bos indicus</i>              | 99.52% | 9.15  | Female | PRJNA379859 | Jiangcheng, Puer, Yunnan, China             |
| 198 | Dianzhong03      | SRR6024565                       | China                     | <i>Bos indicus</i>              | 99.34% | 8.37  | Female | PRJNA379859 | Jiangcheng, Puer, Yunnan, China             |
| 199 | Dianzhong04      | SRR6024566                       | China                     | <i>Bos indicus</i>              | 99.34% | 8.78  | Male   | PRJNA379859 | Jiangcheng, Puer, Yunnan, China             |
| 200 | Dianzhong05      | SRR6024563                       | China                     | <i>Bos indicus</i>              | 99.67% | 9.76  | Female | PRJNA379859 | Jiangcheng, Puer, Yunnan, China             |
| 201 | Dianzhong06      | SRR6024564                       | China                     | <i>Bos indicus</i>              | 99.66% | 9.01  | Female | PRJNA379859 | Jiangcheng, Puer, Yunnan, China             |
| 202 | Wenshan01        | SRR6024561                       | China                     | <i>Bos indicus</i>              | 99.60% | 10.51 | Male   | PRJNA379859 | Guangnan, Wenshan, China                    |
| 203 | Wenshan03        | SRR6024562                       | China                     | <i>Bos indicus</i>              | 99.41% | 11.01 | Male   | PRJNA379859 | Guangnan, Wenshan, China                    |
| 204 | Wenshan04        | SRR6024569                       | China                     | <i>Bos indicus</i>              | 98.60% | 10.98 | Male   | PRJNA379859 | Guangnan, Wenshan, China                    |
| 205 | Wenshan05        | SRR6024570                       | China                     | <i>Bos indicus</i>              | 99.68% | 11.62 | Male   | PRJNA379859 | Guangnan, Wenshan, China                    |
| 206 | Wenshan06        | SRR6024577                       | China                     | <i>Bos indicus</i>              | 99.67% | 11.54 | Male   | PRJNA379859 | Guangnan, Wenshan, China                    |
| 207 | Wenshan07        | SRR6024578                       | China                     | <i>Bos indicus</i>              | 99.70% | 14.46 | Male   | PRJNA379859 | Guangnan, Wenshan, China                    |
| 208 | Wenshan08        | SRR6024575                       | China                     | <i>Bos indicus</i>              | 99.63% | 10.78 | Male   | PRJNA379859 | Guangnan, Wenshan, China                    |
| 209 | Wenshan09        | SRR6024576                       | China                     | <i>Bos indicus</i>              | 99.72% | 8.29  | Male   | PRJNA379859 | Guangnan, Wenshan, China                    |
| 210 | Wannan01         | SRR6024573, SRR5507199           | China                     | <i>Bos indicus</i>              | 99.35% | 23.96 | Male   | PRJNA379859 | Jixi, Anhui, China                          |
| 211 | Wannan02         | SRR6024574, SRR5507198           | China                     | <i>Bos indicus</i>              | 99.37% | 24.32 | Male   | PRJNA379859 | Jixi, Anhui, China                          |
| 212 | Wannan03         | SRR5507197                       | China                     | <i>Bos indicus</i>              | 99.03% | 10.31 | Male   | PRJNA379859 | Jixi, Anhui, China                          |
| 213 | Wannan04         | SRR5507196                       | China                     | <i>Bos indicus</i>              | 98.99% | 11.43 | Male   | PRJNA379859 | Jixi, Anhui, China                          |
| 214 | Wannan05         | SRR5507195                       | China                     | <i>Bos indicus</i>              | 99.39% | 12.49 | Male   | PRJNA379859 | Jixi, Anhui, China                          |
| 215 | Guangfeng01      | SRR5507286                       | China                     | <i>Bos indicus</i>              | 99.80% | 10.05 | Male   | PRJNA379859 | Guangfeng, Shangrao, Jiangxi, China         |
| 216 | Guangfeng02      | SRR5507285                       | China                     | <i>Bos indicus</i>              | 99.81% | 10.84 | Male   | PRJNA379859 | Guangfeng, Shangrao, Jiangxi, China         |
| 217 | Guangfeng03      | SRR5507284                       | China                     | <i>Bos indicus</i>              | 99.78% | 9.89  | Male   | PRJNA379859 | Guangfeng, Shangrao, Jiangxi, China         |
| 218 | Guangfeng04      | SRR5507283                       | China                     | <i>Bos indicus</i>              | 99.80% | 12.03 | Male   | PRJNA379859 | Guangfeng, Shangrao, Jiangxi, China         |
| 219 | Ji'an01          | SRR5507282                       | China                     | <i>Bos indicus</i>              | 99.82% | 11.62 | Male   | PRJNA379859 | Ji'an, Jiangxi, China                       |
| 220 | Ji'an02          | SRR5507281                       | China                     | <i>Bos indicus</i>              | 99.70% | 10.30 | Male   | PRJNA379859 | Ji'an, Jiangxi, China                       |
| 221 | Ji'an03          | SRR5507280                       | China                     | <i>Bos indicus</i>              | 99.79% | 11.17 | Male   | PRJNA379859 | Ji'an, Jiangxi, China                       |
| 222 | Ji'an04          | SRR5507279                       | China                     | <i>Bos indicus</i>              | 99.83% | 11.95 | Male   | PRJNA379859 | Ji'an, Jiangxi, China                       |
| 223 | Jinjiang01       | SRR5507278                       | China                     | <i>Bos indicus</i>              | 99.80% | 11.27 | Male   | PRJNA379859 | Gaoan, Yichuan, Jiangxi, China              |
| 224 | Jinjiang03       | SRR5507275                       | China                     | <i>Bos indicus</i>              | 99.74% | 10.37 | Male   | PRJNA379859 | Gaoan, Yichuan, Jiangxi, China              |
| 225 | Jinjiang04       | SRR5507274                       | China                     | <i>Bos indicus</i>              | 99.80% | 12.05 | Male   | PRJNA379859 | Gaoan, Yichuan, Jiangxi, China              |
| 226 | Leiqiong01       | SRR5507190                       | China                     | <i>Bos indicus</i>              | 99.78% | 10.80 | Female | PRJNA379859 | Leizhou, Guangdong, China                   |
| 227 | Leiqiong02       | SRR5507189                       | China                     | <i>Bos indicus</i>              | 99.15% | 12.15 | Female | PRJNA379859 | Leizhou, Guangdong, China                   |
| 228 | Leiqiong03       | SRR5507188                       | China                     | <i>Bos indicus</i>              | 99.42% | 11.46 | Female | PRJNA379859 | Leizhou, Guangdong, China                   |
| 229 | Hariana          | SRR6936539                       | India                     | <i>Bos indicus</i>              | 99.53% | 36.85 | Female | PRJNA379859 | Gurgaon, Haryana, India                     |
| 230 | Sahiwal          | SRR6936540                       | Pakistan                  | <i>Bos indicus</i>              | 99.67% | 21.99 | Female | PRJNA379859 | Sahiwal, Punjab, Pakistan                   |
| 231 | Tharparkar       | SRR6936538                       | Pakistan                  | <i>Bos indicus</i>              | 99.29% | 17.26 | Female | PRJNA379859 | Tharparkar, Sindh, Pakistan                 |
| 232 | Brahman01        | SRR2016745                       | United States (via India) | <i>Bos indicus</i>              | 99.27% | 4.87  | Male   | PRJNA277147 | Brahman, West Bengal, India                 |
| 233 | Brahman02        | SRR2016748                       | United States (via India) | <i>Bos indicus</i>              | 99.71% | 8.46  | Male   | PRJNA277147 | Brahman, West Bengal, India                 |
| 234 | Brahman03        | SRR2016749                       | United States (via India) | <i>Bos indicus</i>              | 99.32% | 6.61  | Male   | PRJNA277147 | Brahman, West Bengal, India                 |
| 235 | Brahman04        | SRR2016795                       | United States (via India) | <i>Bos indicus</i>              | 99.69% | 6.70  | Male   | PRJNA277147 | Brahman, West Bengal, India                 |
| 236 | Brahman05        | SRR4002987-3008                  | United States (via India) | <i>Bos indicus</i>              | 98.87% | 14.08 | Male   | PRJNA324822 | Brahman, West Bengal, India                 |
| 237 | Brahman06        | SRR4002969-2986                  | United States (via India) | <i>Bos indicus</i>              | 99.04% | 16.62 | Male   | PRJNA324822 | Brahman, West Bengal, India                 |
| 238 | Brahman07        | SRR4002956-2968                  | United States (via India) | <i>Bos indicus</i>              | 98.97% | 15.38 | Male   | PRJNA324822 | Brahman, West Bengal, India                 |
| 239 | Brahman08        | SRR4002953-55, SRR4003443-       | United States (via India) | <i>Bos indicus</i>              | 98.35% | 18.60 | Male   | PRJNA324822 | Brahman, West Bengal, India                 |
| 240 | Brahman09        | SRR4003434-42                    | United States (via India) | <i>Bos indicus</i>              | 98.71% | 18.10 | Male   | PRJNA324822 | Brahman, West Bengal, India                 |
| 241 | Gir01            | SRR2016752                       | United States (via India) | <i>Bos indicus</i>              | 99.21% | 13.61 | Male   | PRJNA277147 | Brahman, West Bengal, India                 |
| 242 | Gir02            | SRR2016753                       | United States (via India) | <i>Bos indicus</i>              | 98.37% | 4.70  | Male   | PRJNA277147 | Amblash, Gujarat, India                     |
| 243 | Gir03            | SRR2016754                       | United States (via India) | <i>Bos indicus</i>              | 99.70% | 10.66 | Male   | PRJNA277147 | Amblash, Gujarat, India                     |
| 244 | Gir04            | SRR2016755                       | United States (via India) | <i>Bos indicus</i>              | 99.64% | 6.73  | Male   | PRJNA277147 | Amblash, Gujarat, India                     |
| 245 | Nelore01         | SRR2016756                       | Brazil (via India)        | <i>Bos indicus</i>              | 99.53% | 7.19  | Male   | PRJNA277147 | Amblash, Gujarat, India                     |
| 246 | Nelore02         | SRR2016757                       | Brazil (via India)        | <i>Bos indicus</i>              | 98.85% | 5.96  | Male   | PRJNA277147 | Nelore, Andhra, India                       |
| 247 | Nelore03         | SRR2016759                       | Brazil (via India)        | <i>Bos indicus</i>              | 99.69% | 8.27  | Male   | PRJNA277147 | Nelore, Andhra, India                       |
| 248 | Nelore04         | SRR2016762                       | Brazil (via India)        | <i>Bos indicus</i>              | 97.80% | 13.86 | Female | PRJNA277147 | Nelore, Andhra, India                       |
| 249 | Ankole01         | ERR320247                        | Uganda                    | <i>Bos taurus x Bos indicus</i> | 99.84% | 13.71 | Male   | PRJEB1829   | Masindi, Uganda (Closest city)              |
| 250 | Ankole02         | ERR320264                        | Uganda                    | <i>Bos taurus x Bos indicus</i> | 99.86% | 14.20 | Male   | PRJEB1829   | Hoima, Uganda (Closest city)                |
| 251 | Ankole03         | ERR320245                        | Uganda                    | <i>Bos taurus x Bos indicus</i> | 99.88% | 13.28 | Female | PRJEB1829   | Rukungiri, Uganda (Closest city)            |
| 252 | Ankole04         | ERR320251                        | Uganda                    | <i>Bos taurus x Bos indicus</i> | 99.68% | 13.35 | Female | PRJEB1829   | Kaberamaido, Uganda (Closest city)          |
| 253 | Ankole05         | ERR320255                        | Uganda                    | <i>Bos taurus x Bos indicus</i> | 99.85% | 13.59 | Female | PRJEB1829   | Mubende, Uganda (Closest city)              |
| 254 | Shorthorn Zebu01 | ERR320241                        | Uganda                    | <i>Bos taurus x Bos indicus</i> | 99.82% | 13.76 | Female | PRJEB1829   | Mubende, Uganda (Closest city)              |
| 255 | Shorthorn Zebu02 | ERR320244                        | Uganda                    | <i>Bos taurus x Bos indicus</i> | 99.82% | 14.04 | Female | PRJEB1829   | Kitgum, Uganda (Closest city)               |
| 256 | Shorthorn Zebu03 | ERR320246                        | Uganda                    | <i>Bos taurus x Bos indicus</i> | 99.83% | 13.53 | Female | PRJEB1829   | Adjumani, Uganda (Closest city)             |
| 257 | Shorthorn Zebu04 | ERR320249                        | Uganda                    | <i>Bos taurus x Bos indicus</i> | 99.82% | 14.33 | Female | PRJEB1829   | Kaberamaido, Uganda (Closest city)          |
| 258 | Shorthorn Zebu05 | ERR320252                        | Uganda                    | <i>Bos taurus x Bos indicus</i> | 99.80% | 14.52 | Female | PRJEB1829   | Kotido, Uganda (Closest city)               |
| 259 | Nganda           | ERR320263                        | Uganda                    | <i>Bos taurus x Bos indicus</i> | 99.83% | 13.30 | Female | PRJEB1829   | Masaka, Uganda (Closest city)               |
| 260 | Nsongora         | ERR320256                        | Uganda                    | <i>Bos taurus x Bos indicus</i> | 99.85% | 14.65 | Female | PRJEB1829   | Kasese, Uganda (Closest city)               |
| 261 | Banteng01        | SRR4035276-79                    | Indonesia                 | <i>Bos javanicus</i>            | 97.00% | 10.65 | Male   | PRJNA325061 | San Diego Zoo, L. Chemnick and O.           |
| 262 | Banteng02        | SRR4035280-83                    | Indonesia                 | <i>Bos javanicus</i>            | 99.25% | 13.93 | Female | PRJNA325061 | San Diego Zoo, L. Chemnick and O.           |
| 263 | Yak01            | SRR2058046                       | China                     | <i>Bos grunniens</i>            | 99.79% | 18.61 | Male   | PRJNA285834 | China                                       |
| 264 | Yak02            | SRR2059936                       | China                     | <i>Bos grunniens</i>            | 99.79% | 18.61 | Male   | PRJNA285834 | China                                       |
| 265 | Yak03            | SRR2059966                       | China                     | <i>Bos grunniens</i>            | 98.88% | 21.70 | Female | PRJNA285834 | China                                       |
| 266 | Yak04            | SRR2059950                       | China                     | <i>Bos grunniens</i>            | 99.68% | 4.92  | Male   | PRJNA285834 | China                                       |
| 267 | Yak05            | SRR2059951                       | China                     | <i>Bos grunniens</i>            | 99.81% | 5.64  | Male   | PRJNA285834 | China                                       |
| 268 | Yak06            | SRR2059952                       | China                     | <i>Bos grunniens</i>            | 99.73% | 7.40  | Male   | PRJNA285834 | China                                       |
| 269 | Yak07            | SRR2059962                       | China                     | <i>Bos grunniens</i>            | 99.78% | 8.66  | Male   | PRJNA285834 | China                                       |
| 270 | Yak08            | SRR2059963                       | China                     | <i>Bos grunniens</i>            | 99.73% | 7.43  | Male   | PRJNA285834 | China                                       |
| 271 | Yak09            | SRR2059964                       | China                     | <i>Bos grunniens</i>            | 99.71% | 6.48  | Male   | PRJNA285834 | China                                       |
| 272 | Yak10            | SRR2059969                       | China                     | <i>Bos grunniens</i>            | 81.17% | 18.70 | Male   | PRJNA285834 | China                                       |
| 273 | Yak11            | SRR2059968                       | China                     | <i>Bos grunniens</i>            | 65.66% | 6.20  | Male   | PRJNA285834 | China                                       |
| 274 | Yak12            | SRR2059965                       | China                     | <i>Bos grunniens</i>            | 99.64% | 7.63  | Male   | PRJNA285834 | China                                       |
| 275 | Yak13            | SRR2062306                       | China                     | <i>Bos grunniens</i>            | 99.56% | 21.37 | Female | PRJNA285834 | China                                       |
| 276 | Gayal            | SRR2182212                       | China                     | <i>Bos frontalis</i>            | 99.37% | 14.37 | Female | PRJNA293670 | China                                       |
| 277 | Buffalo01        | SRR4477891                       | India                     | <i>Bubalus bubalis</i>          | 98.61% | 11.61 | Male   | PRJNA350833 | India                                       |
| 278 | Buffalo02        | SRR4477892                       | India                     | <i>Bubalus bubalis</i>          | 98.12% | 10.96 | Male   | PRJNA350833 | India                                       |
| 279 | Wisent01         | SRR3178074                       | Poland                    | <i>Bison bonasus</i>            | 99.98% | 10.36 | Male   | PRJNA312492 | Poland                                      |
| 280 | Wisent02         | SRS1439150                       | Poland                    | <i>Bison bonasus</i>            | 98.78% | 37.34 | Male   | PRJNA321590 | Poland                                      |
| 281 | Wisent03         | Wisent                           | Poland                    | <i>Bison bonasus</i>            | 99.39% | 38.96 | Female | PRJNA321590 | Poland                                      |
| 282 | Gaurus01         | SRR4035250-7, SRR4035262, 73, 95 | India                     | <i>Bos gaurus</i>               | 98.58% | 4.12  | Female | PRJNA325061 | Henry Doorly Zoo, D. Armstrong and E. Louis |

|     |          |                                                     |         |                     |        |       |      |             |                                             |
|-----|----------|-----------------------------------------------------|---------|---------------------|--------|-------|------|-------------|---------------------------------------------|
| 283 | Gaurus02 | SRR4035258-1, SRR4035263-72, India<br>SRR4035274-75 |         | <i>Bos gaurus</i>   | 98.49% | 7.42  | Male | PRJNA325061 | Henry Doorly Zoo, D. Armstrong and E. Louis |
| 284 | Bision01 | SRR4035285-91                                       | America | <i>Bison bision</i> | 96.98% | 9.44  | Male | PRJNA325061 | Henry Doorly Zoo, D. Armstrong and E. Louis |
| 285 | Bision02 | SRS1437873                                          | America | <i>Bison bision</i> | 99.85% | 31.79 | Male | PRJNA321590 |                                             |

---

# Samples are shown in bold fonts sequenced in this study.

**Supplementary Table 2. Summary information of the 260 individuals from 49 cattle breeds and other 25 individuals of the tribe Bovini.**

| Figure legend | Breeds                 | Origin region                | Animal count | Study                                                  | Geographic regions   | Region definitions                                                                                                                                                                                                                                      |             |                                                                                                                                             |
|---------------|------------------------|------------------------------|--------------|--------------------------------------------------------|----------------------|---------------------------------------------------------------------------------------------------------------------------------------------------------------------------------------------------------------------------------------------------------|-------------|---------------------------------------------------------------------------------------------------------------------------------------------|
| 1             | Red Angus              | Great British                | 10           | Stothard <i>et al.</i> 2015                            | West Europe          | Cattle breeds from modern United Kingdom, Channel Islands and Netherlands.                                                                                                                                                                              |             |                                                                                                                                             |
| 2             | Angus                  | Great British                | 10           | Stothard <i>et al.</i> 2015                            |                      |                                                                                                                                                                                                                                                         |             |                                                                                                                                             |
| 3             | Devon                  | Great British                | 1            | Stothard <i>et al.</i> 2015                            |                      |                                                                                                                                                                                                                                                         |             |                                                                                                                                             |
| 4             | Hereford               | Great British                | 10           | Stothard <i>et al.</i> 2015                            |                      |                                                                                                                                                                                                                                                         |             |                                                                                                                                             |
| 5             | Holstein               | Netherlands                  | 10           | Stothard <i>et al.</i> 2015                            |                      |                                                                                                                                                                                                                                                         |             |                                                                                                                                             |
| 6             | Jersey                 | Channel Islands              | 3            | Heaton <i>et al.</i> 2016                              | Central-South Europe | Cattle breeds from modern Central and South Europe, including countries of France, Italy, Germany and Switzerland.                                                                                                                                      |             |                                                                                                                                             |
| 7             | Maine Anjou            | France, South Europe         | 6            | Stothard <i>et al.</i> 2015                            |                      |                                                                                                                                                                                                                                                         |             |                                                                                                                                             |
| 8             | Salers                 | France, South Europe         | 1            | Stothard <i>et al.</i> 2015                            |                      |                                                                                                                                                                                                                                                         |             |                                                                                                                                             |
| 9             | Charolais              | France, South Europe         | 6            | Stothard <i>et al.</i> 2015                            |                      |                                                                                                                                                                                                                                                         |             |                                                                                                                                             |
| 10            | Limousin               | France, South Europe         | 1            | Stothard <i>et al.</i> 2015                            |                      |                                                                                                                                                                                                                                                         |             |                                                                                                                                             |
| 11            | Piedmontese            | Italy, South Europe          | 5            | Stothard <i>et al.</i> 2015                            |                      |                                                                                                                                                                                                                                                         |             |                                                                                                                                             |
| 12            | Gelbvieh               | Germany, Central Europe      | 10           | Stothard <i>et al.</i> 2015                            |                      |                                                                                                                                                                                                                                                         |             |                                                                                                                                             |
| 13            | Simmental              | Switzerland, Central Europe  | 10           | Stothard <i>et al.</i> 2015                            |                      |                                                                                                                                                                                                                                                         |             |                                                                                                                                             |
| 14            | Rashoki                | Iran, Middle East            | 8            | NextGen project                                        | The Middle East      | Cattle from modern Iran.                                                                                                                                                                                                                                |             |                                                                                                                                             |
| 15            | Kazakh                 | Northwest China              | 9            | This study                                             | Northwest China      | Cattle breeds from modern northwest Chinese provinces of Xinjiang and Qinghai.                                                                                                                                                                          |             |                                                                                                                                             |
| 16            | Mongolian              | Northwest China              | 7            | This study                                             |                      |                                                                                                                                                                                                                                                         |             |                                                                                                                                             |
| 17            | Chaidamu               | Northwest China              | 5            | This study                                             |                      |                                                                                                                                                                                                                                                         |             |                                                                                                                                             |
| 18            | Tibetan                | Tibet, China                 | 9            | This study                                             | Tibet                | Cattle from Tibetan Plateau.                                                                                                                                                                                                                            |             |                                                                                                                                             |
| 19            | Mishima                | Japan, Northeast Asia        | 7            | Tsuda <i>et al.</i> 2013                               | Northeast Asia       | Cattle breeds from modern Korea, Japan and Northeast Chinese provinces of Jilin.                                                                                                                                                                        |             |                                                                                                                                             |
| 20            | Kuchinoshima           | Japan, Northeast Asia        | 1            | Kawahara-Miki <i>et al.</i> 2011                       |                      |                                                                                                                                                                                                                                                         |             |                                                                                                                                             |
| 21            | Hanwoo                 | Korea, Northeast Asia        | 18           | Shin <i>et al.</i> 2014                                |                      |                                                                                                                                                                                                                                                         |             |                                                                                                                                             |
| 22            | Yanbian                | Jilin, China, Northeast Asia | 1            | This study                                             |                      |                                                                                                                                                                                                                                                         |             |                                                                                                                                             |
| 23            | Luxi                   | North China                  | 5            | This study                                             | North-Central China  | Cattle breeds from modern Chinese provinces of Shandong, Henan, Shaanxi, Anhui, Hubei. And Weining breed of southwest Chinese province of Guizhou.                                                                                                      |             |                                                                                                                                             |
| 24            | Jiaxian Red            | North China                  | 5            | This study                                             |                      |                                                                                                                                                                                                                                                         |             |                                                                                                                                             |
| 25            | Bohai Black            | North China                  | 5            | This study                                             |                      |                                                                                                                                                                                                                                                         |             |                                                                                                                                             |
| 26            | Nanyang                | North China                  | 5            | This study                                             |                      |                                                                                                                                                                                                                                                         |             |                                                                                                                                             |
| 27            | Bashan                 | Central China                | 5            | This study                                             |                      |                                                                                                                                                                                                                                                         |             |                                                                                                                                             |
| 28            | Lingnan                | Central China                | 8            | This study                                             |                      |                                                                                                                                                                                                                                                         |             |                                                                                                                                             |
| 29            | Wandong                | Central China                | 2            | This study                                             |                      |                                                                                                                                                                                                                                                         |             |                                                                                                                                             |
| 30            | Zaobei                 | Central China                | 5            | This study                                             |                      |                                                                                                                                                                                                                                                         |             |                                                                                                                                             |
| 31            | Dabieshan              | Central China                | 2            | This study                                             |                      |                                                                                                                                                                                                                                                         |             |                                                                                                                                             |
| 32            | Weining                | Central China                | 5            | This study                                             |                      |                                                                                                                                                                                                                                                         |             |                                                                                                                                             |
| 33            | Jinjiang               | South China                  | 3            | This study                                             |                      |                                                                                                                                                                                                                                                         | South China | Cattle breeds from modern southeast Chinese provinces of Anhui, Jiangxi, Guangdong, Hainan and modern southwest Chinese province of Yunnan. |
| 34            | Wannan                 | South China                  | 5            | This study                                             |                      |                                                                                                                                                                                                                                                         |             |                                                                                                                                             |
| 35            | Guangfeng              | South China                  | 4            | This study                                             |                      |                                                                                                                                                                                                                                                         |             |                                                                                                                                             |
| 36            | Ji'an                  | South China                  | 4            | This study                                             |                      |                                                                                                                                                                                                                                                         |             |                                                                                                                                             |
| 37            | Leiqiong               | South China                  | 3            | This study                                             |                      |                                                                                                                                                                                                                                                         |             |                                                                                                                                             |
| 38            | Wenshan                | South China                  | 8            | This study                                             |                      |                                                                                                                                                                                                                                                         |             |                                                                                                                                             |
| 39            | Dianzhong              | South China                  | 6            | This study                                             |                      |                                                                                                                                                                                                                                                         |             |                                                                                                                                             |
| 40            | Hariana                | India                        | 1            | This study                                             | India-Pakistan       | Cattle breeds from India and Pakistan. Three indicine cattle breeds (Gir, Brahman, and Nelore) were imported from India to modern Brazil and USA. Please note that the American Brahman was the first beef cattle breed developed in the United States. |             |                                                                                                                                             |
| 41            | Gir                    | India                        | 4            | Bickhart <i>et al.</i> 2016                            |                      |                                                                                                                                                                                                                                                         |             |                                                                                                                                             |
| 42            | Sahiwal                | Pakistan                     | 1            | This study                                             |                      |                                                                                                                                                                                                                                                         |             |                                                                                                                                             |
| 43            | Nelore                 | India                        | 4            | Bickhart <i>et al.</i> 2016; Heaton <i>et al.</i> 2016 |                      |                                                                                                                                                                                                                                                         |             |                                                                                                                                             |
| 44            | Tharparkar             | Pakistan                     | 1            | This study                                             |                      |                                                                                                                                                                                                                                                         |             |                                                                                                                                             |
| 45            | Brahman                | India                        | 9            | Bickhart <i>et al.</i> 2016                            |                      |                                                                                                                                                                                                                                                         |             |                                                                                                                                             |
| 46            | Shorthorn Zebu         | Uganda, Africa               | 5            | NextGen project                                        | Africa               | Four breeds from African country of Uganda.                                                                                                                                                                                                             |             |                                                                                                                                             |
| 47            | Nsongora               | Uganda, Africa               | 1            | NextGen project                                        |                      |                                                                                                                                                                                                                                                         |             |                                                                                                                                             |
| 48            | Ankole                 | Uganda, Africa               | 5            | NextGen project                                        |                      |                                                                                                                                                                                                                                                         |             |                                                                                                                                             |
| 49            | Nganda                 | Uganda, Africa               | 1            | NextGen project                                        |                      |                                                                                                                                                                                                                                                         |             |                                                                                                                                             |
| Sub total     |                        |                              | 260          |                                                        |                      |                                                                                                                                                                                                                                                         |             |                                                                                                                                             |
| 50            | <i>Bos javanicus</i>   | Southeast Asian              | 2            | Heaton <i>et al.</i> 2016                              |                      |                                                                                                                                                                                                                                                         |             |                                                                                                                                             |
| 51            | <i>Bos grunniens</i>   | China                        | 13           | Qiu <i>et al.</i> 2015                                 |                      |                                                                                                                                                                                                                                                         |             |                                                                                                                                             |
| 52            | <i>Bos frontalis</i>   | China                        | 1            | Mei <i>et al.</i> 2016                                 |                      |                                                                                                                                                                                                                                                         |             |                                                                                                                                             |
| 53            | <i>Bubalus bubalis</i> | India                        | 2            | Whitacre <i>et al.</i> 2017                            |                      |                                                                                                                                                                                                                                                         |             |                                                                                                                                             |
| 54            | <i>Bison bonasus</i>   | Poland                       | 3            | Gautier <i>et al.</i> 2016; Wang <i>et al.</i> 2015    |                      |                                                                                                                                                                                                                                                         |             |                                                                                                                                             |
| 55            | <i>Bos gaurus</i>      | India                        | 2            | Heaton <i>et al.</i> 2016                              |                      |                                                                                                                                                                                                                                                         |             |                                                                                                                                             |
| 56            | <i>Bison bison</i>     | America                      | 2            | Heaton <i>et al.</i> 2016                              |                      |                                                                                                                                                                                                                                                         |             |                                                                                                                                             |
| Total         |                        |                              | 285          |                                                        |                      |                                                                                                                                                                                                                                                         |             |                                                                                                                                             |

**Supplementary Table 3. Distribution of SNPs within various genomic regions**

| Variant type   | SNP count  |
|----------------|------------|
| Total number   | 60,449,904 |
| Intergenic     | 36,108,854 |
| Intronic       | 22,505,972 |
| Downstream     | 455,885    |
| Upstream       | 403,373    |
| Exonic         | 611,221    |
| UTRs           | 362,689    |
| Synonymous     | 241,397    |
| Non-synonymous | 166,069    |
| Splicing       | 1,910      |
| Stop gain      | 1,984      |
| Stop loss      | 188        |
| Others         | 22,424     |



**Supplementary Table 4. Tracy-Widom (TW) statistics and *P*-values for the first 10 eigenvalues in the PCA of 260 individuals. The significant *P*-values are in bold fonts.**

| Number | Eigenvalues | TW      | <i>P</i>            |
|--------|-------------|---------|---------------------|
| 1      | 11.698184   | 198.147 | <b>0</b>            |
| 2      | 4.070315    | 112.424 | <b>0</b>            |
| 3      | 3.423612    | 96.689  | <b>2.41609e-277</b> |
| 4      | 2.578969    | 54.138  | <b>2.43152e-117</b> |
| 5      | 2.439277    | 49.685  | <b>2.11984e-103</b> |
| 6      | 1.928385    | 15.279  | <b>3.64978e-19</b>  |
| 7      | 1.714968    | 0.118   | 0.147729            |
| 8      | 1.700554    | -0.145  | 0.195776            |
| 9      | 1.648901    | -3.408  | 0.968426            |
| 10     | 1.639959    | -3.373  | 0.965987            |

**Supplementary Table 5. Tracy-Widom (TW) statistics and *P*-values for the first 10 eigenvalues in the PCA of taurine cattle. The significant *P*-values are in bold fonts.**

| Number | Eigenvalues | TW     | <i>P</i>          |
|--------|-------------|--------|-------------------|
| 1      | 3.959023    | 48.120 | <b>1.2077e-98</b> |
| 2      | 3.017990    | 31.273 | <b>1.3819e-52</b> |
| 3      | 2.561145    | 20.917 | <b>1.3214e-29</b> |
| 4      | 2.252381    | 12.531 | <b>1.0773e-14</b> |
| 5      | 2.075111    | 7.604  | <b>2.4727e-08</b> |
| 6      | 1.959948    | 4.475  | <b>7.7183e-05</b> |
| 7      | 1.904414    | 3.522  | <b>0.0006025</b>  |
| 8      | 1.835636    | 1.822  | 0.0139572         |
| 9      | 1.831692    | 2.902  | 0.0020588         |
| 10     | 1.785953    | 2.103  | 0.0087439         |

**Supplementary Table 6. Tracy-Widom (TW) statistics and *P*-values for the first 10 eigenvalues in the PCA of indicine cattle. The significant *P*-values are in bold fonts.**

| Number | Eigenvalues | TW     | <i>P</i>           |
|--------|-------------|--------|--------------------|
| 1      | 3.958       | 31.030 | <b>5.37075e-52</b> |
| 2      | 1.560       | 5.061  | <b>1.97862e-05</b> |
| 3      | 1.336       | -2.798 | 0.902362           |
| 4      | 1.239       | -6.460 | 1                  |
| 5      | 1.226       | -6.408 | 1                  |
| 6      | 1.200       | -6.979 | 1                  |
| 7      | 1.187       | -6.987 | 1                  |
| 8      | 1.182       | -6.587 | 1                  |
| 9      | 1.176       | -6.209 | 1                  |
| 10     | 1.168       | -5.914 | 1                  |

**Supplementary Table 7. Cross-validation (CV) errors for ADMIXTURE ancestry models with  $K$  ranging from 2 to 8.**

| $K$ value | CV error |
|-----------|----------|
| $K = 2$   | 0.23739  |
| $K = 3$   | 0.23251  |
| $K = 4$   | 0.23099  |
| $K = 5$   | 0.23149  |
| $K = 6$   | 0.22844  |
| $K = 7$   | 0.23110  |
| $K = 8$   | 0.23572  |

**Supplementary Table 8. Mapping results for 147 present-day cattle mitochondrial genomes and information of the 24 reference genomes.**

| Number | Sample ID <sup>#</sup> | Country of origin | Region of origin      | Genbank ID | Haplotype  | Coverage       |
|--------|------------------------|-------------------|-----------------------|------------|------------|----------------|
| 1      | Angus09                | United Kingdom    | West Europe           |            | T3         | 970.73         |
| 2      | Hereford01             | United Kingdom    | West Europe           |            | T3         | 1608.69        |
| 3      | Hereford02             | United Kingdom    | West Europe           |            | T3         | 298.39         |
| 4      | Hereford03             | United Kingdom    | West Europe           |            | T3         | 1127.81        |
| 5      | Hereford04             | United Kingdom    | West Europe           |            | T3         | 625.68         |
| 6      | Charolais02            | France            | Southern Europe       |            | T3         | 1050.89        |
| 7      | Gelbvieh02             | Germany           | Northern Europe       |            | T3         | 1463.44        |
| 8      | Gelbvieh03             | Germany           | Northern Europe       |            | T3         | 1440.98        |
| 9      | Holstein01             | Netherlands       | Northern Europe       |            | T3         | 768.23         |
| 10     | Holstein05             | Netherlands       | Northern Europe       |            | T3         | 1272.87        |
| 11     | Holstein06             | Netherlands       | Northern Europe       |            | T3         | 2147.33        |
| 12     | Rashoki01              | Iran              | Middle East           |            | T2         | 441.72         |
| 13     | Rashoki02              | Iran              | Middle East           |            | T2         | 281.06         |
| 14     | Rashoki03              | Iran              | Middle East           |            | T2         | 1047.21        |
| 15     | Rashoki04              | Iran              | Middle East           |            | T2         | 651.83         |
| 16     | Rashoki05              | Iran              | Middle East           |            | T2         | 329.96         |
| 17     | Rashoki06              | Iran              | Middle East           |            | T2         | 349.76         |
| 18     | Rashoki07              | Iran              | Middle East           |            | T2         | 324.09         |
| 19     | Hanwoo01               | Korea             | Northeast Asia        |            | T3         | 856.56         |
| 20     | Hanwoo02               | Korea             | Northeast Asia        |            | P          | 794.23         |
| 21     | Hanwoo03               | Korea             | Northeast Asia        |            | T3         | 866.89         |
| 22     | Hanwoo04               | Korea             | Northeast Asia        |            | T2         | 1023.72        |
| 23     | Hanwoo05               | Korea             | Northeast Asia        |            | T3         | 1021.93        |
| 24     | Hanwoo06               | Korea             | Northeast Asia        |            | T2         | 860.67         |
| 25     | <b>Yanbian</b>         | <b>China</b>      | <b>Northeast Asia</b> |            | <b>T3</b>  | <b>1161.68</b> |
| 26     | <b>Chaidamu01</b>      | <b>China</b>      | <b>Northern China</b> |            | <b>T3</b>  | <b>1277.16</b> |
| 27     | <b>Chaidamu02</b>      | <b>China</b>      | <b>Northern China</b> |            | <b>T3</b>  | <b>1343.93</b> |
| 28     | <b>Chaidamu03</b>      | <b>China</b>      | <b>Northern China</b> |            | <b>I1a</b> | <b>744.71</b>  |
| 29     | <b>Chaidamu04</b>      | <b>China</b>      | <b>Northern China</b> |            | <b>I1a</b> | <b>931.95</b>  |
| 30     | <b>Chaidamu05</b>      | <b>China</b>      | <b>Northern China</b> |            | <b>T3</b>  | <b>1017.65</b> |
| 31     | <b>Mongolian01</b>     | <b>China</b>      | <b>Northern China</b> |            | <b>T3</b>  | <b>2212.03</b> |
| 32     | <b>Mongolian02</b>     | <b>China</b>      | <b>Northern China</b> |            | <b>T3</b>  | <b>3147.08</b> |
| 33     | <b>Mongolian03</b>     | <b>China</b>      | <b>Northern China</b> |            | <b>T3</b>  | <b>2725.61</b> |
| 34     | <b>Mongolian04</b>     | <b>China</b>      | <b>Northern China</b> |            | <b>T3</b>  | <b>3414.17</b> |
| 35     | <b>Mongolian05</b>     | <b>China</b>      | <b>Northern China</b> |            | <b>I1</b>  | <b>2077.25</b> |
| 36     | <b>Mongolian06</b>     | <b>China</b>      | <b>Northern China</b> |            | <b>T2</b>  | <b>1970.53</b> |
| 37     | <b>Mongolian07</b>     | <b>China</b>      | <b>Northern China</b> |            | <b>T3</b>  | <b>1931.25</b> |
| 38     | <b>Kazakh01</b>        | <b>China</b>      | <b>Northern China</b> |            | <b>T2</b>  | <b>989.18</b>  |
| 39     | <b>Kazakh02</b>        | <b>China</b>      | <b>Northern China</b> |            | <b>T3</b>  | <b>2599.75</b> |
| 40     | <b>Kazakh03</b>        | <b>China</b>      | <b>Northern China</b> |            | <b>T2</b>  | <b>1788.21</b> |
| 41     | <b>Kazakh04</b>        | <b>China</b>      | <b>Northern China</b> |            | <b>T3</b>  | <b>1602.23</b> |
| 42     | <b>Kazakh05</b>        | <b>China</b>      | <b>Northern China</b> |            | <b>I1</b>  | <b>1267.30</b> |
| 43     | <b>Kazakh06</b>        | <b>China</b>      | <b>Northern China</b> |            | <b>T2</b>  | <b>1551.82</b> |
| 44     | <b>Kazakh07</b>        | <b>China</b>      | <b>Northern China</b> |            | <b>T3</b>  | <b>1057.20</b> |
| 45     | <b>Kazakh08</b>        | <b>China</b>      | <b>Northern China</b> |            | <b>I1</b>  | <b>1496.54</b> |
| 46     | <b>Kazakh09</b>        | <b>China</b>      | <b>Northern China</b> |            | <b>T3</b>  | <b>1047.36</b> |
| 47     | <b>Tibetan01</b>       | <b>China</b>      | <b>Northern China</b> |            | <b>T3</b>  | <b>2661.82</b> |
| 48     | <b>Tibetan02</b>       | <b>China</b>      | <b>Northern China</b> |            | <b>T3</b>  | <b>3074.78</b> |
| 49     | <b>Tibetan03</b>       | <b>China</b>      | <b>Northern China</b> |            | <b>T3</b>  | <b>3057.57</b> |
| 50     | <b>Tibetan04</b>       | <b>China</b>      | <b>Northern China</b> |            | <b>T4</b>  | <b>1736.17</b> |
| 51     | <b>Tibetan05</b>       | <b>China</b>      | <b>Northern China</b> |            | <b>T3</b>  | <b>1954.04</b> |
| 52     | <b>Tibetan06</b>       | <b>China</b>      | <b>Northern China</b> |            | <b>T3</b>  | <b>2886.23</b> |
| 53     | <b>Tibetan07</b>       | <b>China</b>      | <b>Northern China</b> |            | <b>T3</b>  | <b>1106.24</b> |
| 54     | <b>Tibetan08</b>       | <b>China</b>      | <b>Northern China</b> |            | <b>Yak</b> | <b>1522.38</b> |
| 55     | <b>Tibetan09</b>       | <b>China</b>      | <b>Northern China</b> |            | <b>Yak</b> | <b>1212.29</b> |
| 56     | <b>Luxi01</b>          | <b>China</b>      | <b>Northern China</b> |            | <b>I1a</b> | <b>721.29</b>  |
| 57     | <b>Luxi02</b>          | <b>China</b>      | <b>Northern China</b> |            | <b>I1a</b> | <b>702.18</b>  |
| 58     | <b>Luxi03</b>          | <b>China</b>      | <b>Northern China</b> |            | <b>I1a</b> | <b>735.41</b>  |
| 59     | <b>Luxi04</b>          | <b>China</b>      | <b>Northern China</b> |            | <b>I1a</b> | <b>651.77</b>  |
| 60     | <b>Luxi05</b>          | <b>China</b>      | <b>Northern China</b> |            | <b>I1a</b> | <b>826.60</b>  |
| 61     | <b>Nanyang01</b>       | <b>China</b>      | <b>Northern China</b> |            | <b>I1a</b> | <b>241.19</b>  |

|     |              |       |                |     |         |
|-----|--------------|-------|----------------|-----|---------|
| 62  | Nanyang02    | China | Northern China | I1a | 410.81  |
| 63  | Nanyang03    | China | Northern China | I1a | 1743.20 |
| 64  | Nanyang04    | China | Northern China | I1a | 1909.07 |
| 65  | Nanyang05    | China | Northern China | T2  | 186.42  |
| 66  | JiaxianRed01 | China | Northern China | I1a | 2080.59 |
| 67  | JiaxianRed02 | China | Northern China | I1  | 2122.92 |
| 68  | JiaxianRed03 | China | Northern China | I1a | 1410.28 |
| 69  | JiaxianRed04 | China | Northern China | T3  | 2125.63 |
| 70  | JiaxianRed05 | China | Northern China | T3  | 686.16  |
| 71  | BohaiBlack01 | China | Northern China | I1a | 572.26  |
| 72  | BohaiBlack02 | China | Northern China | T3  | 319.56  |
| 73  | BohaiBlack03 | China | Northern China | T3  | 619.68  |
| 74  | BohaiBlack04 | China | Northern China | I1a | 552.55  |
| 75  | BohaiBlack05 | China | Northern China | T3  | 608.07  |
| 76  | Lingnan01    | China | Southern China | I1a | 1063.34 |
| 77  | Lingnan02    | China | Southern China | T2  | 154.53  |
| 78  | Lingnan03    | China | Southern China | I1a | 234.64  |
| 79  | Lingnan04    | China | Southern China | I1a | 370.52  |
| 80  | Lingnan05    | China | Southern China | I1a | 852.47  |
| 81  | Lingnan06    | China | Southern China | I1a | 232.10  |
| 82  | Lingnan07    | China | Southern China | I1a | 788.15  |
| 83  | Lingnan08    | China | Southern China | I1a | 1955.32 |
| 84  | Zaobei01     | China | Southern China | I1a | 670.58  |
| 85  | Zaobei02     | China | Southern China | I1a | 574.63  |
| 86  | Zaobei03     | China | Southern China | T3  | 713.06  |
| 87  | Zaobei04     | China | Southern China | I1a | 539.93  |
| 88  | Zaobei05     | China | Southern China | I1a | 661.25  |
| 89  | Bashan01     | China | Southern China | T3  | 1674.55 |
| 90  | Bashan02     | China | Southern China | T3  | 1324.80 |
| 91  | Bashan03     | China | Southern China | I1a | 1384.07 |
| 92  | Bashan04     | China | Southern China | I1a | 1521.73 |
| 93  | Bashan05     | China | Southern China | T3  | 1371.25 |
| 94  | Weining01    | China | Southern China | T3  | 1327.53 |
| 95  | Weining02    | China | Southern China | I1a | 210.63  |
| 96  | Weining03    | China | Southern China | T3  | 1369.17 |
| 97  | Weining04    | China | Southern China | I1a | 1360.17 |
| 98  | Weining05    | China | Southern China | I1a | 2251.16 |
| 99  | Dianzhong01  | China | Southern China | T2  | 742.48  |
| 100 | Dianzhong02  | China | Southern China | I1a | 996.87  |
| 101 | Dianzhong03  | China | Southern China | I1a | 818.1   |
| 102 | Dianzhong04  | China | Southern China | I1a | 660.45  |
| 103 | Dianzhong05  | China | Southern China | T2  | 643.49  |
| 104 | Dianzhong06  | China | Southern China | I1a | 623.16  |
| 105 | Wenshan01    | China | Southern China | I1a | 138.77  |
| 106 | Wenshan05    | China | Southern China | I1a | 153.56  |
| 107 | Wenshan06    | China | Southern China | I1a | 196.12  |
| 108 | Wenshan07    | China | Southern China | I1a | 217.28  |
| 109 | Wannan01     | China | Southern China | T3  | 414.76  |
| 110 | Wannan02     | China | Southern China | T3  | 423.78  |
| 111 | Wannan03     | China | Southern China | I1a | 485.60  |
| 112 | Wannan04     | China | Southern China | I1a | 298.54  |
| 113 | Wannan05     | China | Southern China | I1a | 436.59  |
| 114 | Wandong01    | China | Southern China | I1a | 1664.90 |
| 115 | Wandong02    | China | Southern China | I1a | 3626.71 |
| 116 | Dabieshan01  | China | Southern China | I1a | 365.05  |
| 117 | Dabieshan02  | China | Southern China | I1a | 2059.40 |
| 118 | Guangfeng01  | China | Southern China | T3  | 1292.19 |
| 119 | Guangfeng02  | China | Southern China | I1a | 1500.51 |
| 120 | Guangfeng03  | China | Southern China | I1a | 1372.01 |
| 121 | Guangfeng04  | China | Southern China | I1a | 1679.77 |
| 122 | Ji'an01      | China | Southern China | T3  | 1389.03 |
| 123 | Ji'an02      | China | Southern China | I1a | 1382.27 |
| 124 | Ji'an03      | China | Southern China | I1a | 1274.81 |
| 125 | Ji'an04      | China | Southern China | I1a | 1730.81 |

|                  |                     |                    |                       |            |                |
|------------------|---------------------|--------------------|-----------------------|------------|----------------|
| 126              | <b>Jingjiang01</b>  | <b>China</b>       | <b>Southern China</b> | <b>I1a</b> | <b>1249.82</b> |
| 127              | <b>Jingjiang03</b>  | <b>China</b>       | <b>Southern China</b> | <b>I1a</b> | <b>1245.20</b> |
| 128              | <b>Jingjiang04</b>  | <b>China</b>       | <b>Southern China</b> | <b>I1a</b> | <b>1479.09</b> |
| 129              | <b>Leiqiong01</b>   | <b>China</b>       | <b>Southern China</b> | <b>I1a</b> | <b>1671.18</b> |
| 130              | <b>Leiqiong02</b>   | <b>China</b>       | <b>Southern China</b> | <b>I1a</b> | <b>2160.81</b> |
| 131              | <b>Leiqiong03</b>   | <b>China</b>       | <b>Southern China</b> | <b>I1a</b> | <b>475.16</b>  |
| 132              | <b>Sahiwal3b</b>    | <b>Pakistan</b>    | <b>India-Pakistan</b> | <b>I2</b>  | <b>1030.03</b> |
| 133              | <b>Hariana03</b>    | <b>India</b>       | <b>India-Pakistan</b> | <b>I1</b>  | <b>1658.57</b> |
| 134              | <b>Tharparkar01</b> | <b>Pakistan</b>    | <b>India-Pakistan</b> | <b>I1</b>  | <b>1658.00</b> |
| 135              | Nelore04            | Brazil (via India) | India-Pakistan        | I1         | 621.36         |
| 136              | Ankole01            | Uganda             | Africa                | T1         | 606.27         |
| 137              | Ankole02            | Uganda             | Africa                | T1         | 591.19         |
| 138              | Ankole03            | Uganda             | Africa                | T1         | 846.30         |
| 139              | Ankole04            | Uganda             | Africa                | T1         | 268.64         |
| 140              | Ankole05            | Uganda             | Africa                | T1         | 696.52         |
| 141              | Shorthorn Zebu01    | Uganda             | Africa                | T1         | 1123.18        |
| 142              | Shorthorn Zebu02    | Uganda             | Africa                | T1         | 837.56         |
| 143              | Shorthorn Zebu03    | Uganda             | Africa                | T1         | 707.47         |
| 144              | Shorthorn Zebu04    | Uganda             | Africa                | T1         | 410.18         |
| 145              | Shorthorn Zebu05    | Uganda             | Africa                | T1         | 730.13         |
| 146              | Nganda              | Uganda             | Africa                | T1         | 1703.51        |
| 147              | Nsongora            | Uganda             | Africa                | T1         | 971.09         |
| 148              | P_ GU985279         |                    |                       | GU985279   | P              |
| 149              | Q_ FJ971080         |                    |                       | FJ971080   | Q              |
| 150              | R_ FJ971084         |                    |                       | FJ971084   | R              |
| 151              | I1_NC005971         |                    |                       | NC_005971  | I1             |
| 152              | I1_ FJ971088        |                    |                       | FJ971088   | I1             |
| 153              | I1_ EU177868        |                    |                       | EU177868   | I1             |
| 154              | I2_ AF492350        |                    |                       | AF492350   | I2             |
| 155              | I2_ EU177870        |                    |                       | EU177870   | I2             |
| 156              | I2_ FJ971088        |                    |                       | FJ971088   | I2             |
| 157              | T1_ EU177842        |                    |                       | EU177842   | T1             |
| 158              | T1_ EU177841        |                    |                       | EU177841   | T1             |
| 159              | T2_ AY676856        |                    |                       | AY676856   | T2             |
| 160              | T2_ EU177859        |                    |                       | EU177859   | T2             |
| 161              | T3_ EU177839        |                    |                       | EU177839   | T3             |
| 162              | T3_ AF492351        |                    |                       | AF492351   | T3             |
| 163              | T3a_ DQ124418       |                    |                       | DQ124418   | T3a            |
| 164              | T4_ NC_006853       |                    |                       | NC_006853  | T4             |
| 165              | T4_ AB074964        |                    |                       | AB074964   | T4             |
| 166              | T4                  |                    |                       | UMD3.1     | T4             |
| 167              | BRS                 |                    |                       | V00654     | T3             |
| 168              | Bos_grunniens01     |                    |                       | KR011113   | Yak            |
| 169              | Bos_grunniens02     |                    |                       | AY684273   | Yak            |
| 170              | Bos_grunniens03     |                    |                       | KR052524   | Yak            |
| 171              | Bison_bison         |                    |                       | EU177871   | Bison          |
| Max coverage     |                     |                    |                       |            | 1152.04        |
| Min coverage     |                     |                    |                       |            | 3626.71        |
| Average coverage |                     |                    |                       |            | 138.77         |

# Sample names in bold fonts were sequenced in this study.

**Supplementary Table 9. Radio carbon dating details for the Shimao05 specimen.**

|                              |                            |
|------------------------------|----------------------------|
| Protein quality assessment1  |                            |
|                              | d13C = -9.5<br>d15N = +7.0 |
| Carbon dating results        |                            |
| Conventional radiocarbon age | 3590 ± 30 BP               |
| Age cal yr BP                |                            |
| (1σ, 95.4% prob.)            | 3975 - 3835 BP             |
| (2σ, 68.2% prob.)            | 3955 - 3950 BP             |

**Results are ISO/IEC-17025:2005 accredited. All work was performed at the Beta Analytic Radiocarbon Dating Laboratory using 4 in-house NEC accelerator mass spectrometers and 4 Thermo IRMSs. The "Conventional Radiocarbon Age" was calculated using the Libby half-life (5568 years) corrected for total isotopic fraction, and it was also used for calendar calibration where applicable. The age is rounded to the nearest 10 years and reported as radiocarbon years before present (BP), "present" = AD 1950. Results greater than the modern reference are reported as percent modern carbon (pMC). The modern reference standard was 95% of the <sup>14</sup>C signature of NIST SRM-4990C (oxalic acid). Calculated sigmas less than 30 BP on the Conventional Radiocarbon Age are conservatively rounded up to 30. d13C values are for the material itself (not the AMS d13C). d13C and d15N values are relative to VPDB-1.**



**Supplementary Table 10. Overview of ancient sample information and sequencing statistics.**

| Sample ID | Accession  | Raw total reads | Raw total bases | Clean total reads | Clean total bases | Mapping rate | Duplication | Mean depth (X) | 1X      | 2X      |
|-----------|------------|-----------------|-----------------|-------------------|-------------------|--------------|-------------|----------------|---------|---------|
| Shimao01  | SRR6942512 | 93,522,476      | 14,028,371,400  | 41,386,217        | 4,496,914,115     | 4.83 %       | 29.84 %     | 0.02           | 2.11 %  | 0.08 %  |
| Shimao02  | SRR6942513 | 81,996,370      | 12,299,455,500  | 37,207,468        | 3,843,193,609     | 12.44 %      | 36.22 %     | 0.07           | 6.11 %  | 0.44 %  |
| Shimao03  | SRR6942510 | 92,171,766      | 13,825,764,900  | 41,354,778        | 4,075,336,474     | 5.78 %       | 32.22 %     | 0.03           | 2.54 %  | 0.10 %  |
| Shimao04  | SRR6942511 | 81,546,778      | 12,232,016,700  | 36,549,466        | 3,147,474,616     | 47.79 %      | 38.48 %     | 0.25           | 19.33 % | 3.91 %  |
| Shimao05  | SRR6942508 | 1,783,427,012   | 267,514,051,800 | 828,686,274       | 67,487,144,053    | 75.45 %      | 83.75 %     | 2.64           | 78.05 % | 54.06 % |
| Shimao06  | SRR6942509 | 90,348,666      | 13,552,299,900  | 40,860,187        | 4,252,414,263     | 4.03 %       | 25.08 %     | 0.02           | 1.75 %  | 0.06 %  |
| Shimao07  | SRR6942506 | 90,309,282      | 13,546,392,300  | 41,978,683        | 3,592,715,359     | 17.78 %      | 38.64 %     | 0.10           | 8.74 %  | 0.85 %  |
| Shimao08  | SRR6942507 | 87,860,794      | 13,179,119,100  | 38,320,227        | 3,701,317,363     | 11.69 %      | 37.64 %     | 0.05           | 4.86 %  | 0.29 %  |

**Supplementary Table 11. Examples of the most significant  $f_3$  statistics for cattle breeds (Mongolian and Kazakh) of Northwest China. Only breeds with more than one sample were considered as test populations in the three-population tests.**

| Pop A<br>(Source population) | Pop B<br>(Source population) | Pop C<br>(Admixed population) | $f_3$ statistic | Standard<br>error | Z       |
|------------------------------|------------------------------|-------------------------------|-----------------|-------------------|---------|
| Holstein                     | Leiqiong                     | Mongolian                     | -0.0771         | 0.00159           | -47.157 |
| Angus                        | Leiqiong                     | Mongolian                     | -0.0763         | 0.00165           | -44.784 |
| Hereford                     | Leiqiong                     | Mongolian                     | -0.0763         | 0.00163           | -45.284 |
| Jersey                       | Leiqiong                     | Mongolian                     | -0.0760         | 0.00163           | -45.096 |
| Piedmontese                  | Leiqiong                     | Mongolian                     | -0.0736         | 0.00161           | -44.268 |
| Holstein                     | Nelore                       | Mongolian                     | -0.0751         | 0.00165           | -44.072 |
| Angus                        | Nelore                       | Mongolian                     | -0.0743         | 0.00173           | -41.555 |
| Jersey                       | Nelore                       | Mongolian                     | -0.0736         | 0.00169           | -42.029 |
| Hereford                     | Nelore                       | Mongolian                     | -0.0730         | 0.00169           | -41.582 |
| Simmental                    | Nelore                       | Mongolian                     | -0.070          | 0.00167           | -41.608 |
| Piedmontese                  | Nelore                       | Kazakh                        | -0.0460         | 0.00142           | -32.401 |
| Limousin                     | Nelore                       | Kazakh                        | -0.0486         | 0.00156           | -30.984 |
| Angus                        | Nelore                       | Kazakh                        | -0.0423         | 0.00138           | -30.61  |
| Holstein                     | Nelore                       | Kazakh                        | -0.0420         | 0.00138           | -30.308 |
| Hereford                     | Nelore                       | Kazakh                        | -0.0410         | 0.00138           | -29.709 |
| Simmental                    | Leiqiong                     | Kazakh                        | -0.0546         | 0.00141           | -38.74  |
| Piedmontese                  | Leiqiong                     | Kazakh                        | -0.0537         | 0.00147           | -36.41  |
| Limousin                     | Leiqiong                     | Kazakh                        | -0.0548         | 0.00162           | -33.649 |
| Hereford                     | Leiqiong                     | Kazakh                        | -0.0456         | 0.00142           | -32.053 |
| Simmental                    | Tibetan                      | Kazakh                        | -0.0040         | 0.00054           | -7.368  |
| Limousin                     | Tibetan                      | Kazakh                        | -0.0036         | 0.00078           | -4.569  |
| Jersey                       | Tibetan                      | Kazakh                        | -0.0022         | 0.00071           | -3.175  |
| Piedmontese                  | Tibetan                      | Kazakh                        | -0.0018         | 0.00053           | -3.516  |
| Gelbvieh                     | Tibetan                      | Kazakh                        | -0.0018         | 0.00058           | -3.217  |
| Simmental                    | Mishima                      | Kazakh                        | -0.0035         | 0.00078           | -4.481  |
| RedAngus                     | Mishima                      | Kazakh                        | -0.0025         | 0.00086           | -3.009  |
| Limousin                     | Mishima                      | Kazakh                        | -0.0006         | 0.00131           | -0.472  |
| Piedmontese                  | Mishima                      | Kazakh                        | -0.0003         | 0.00085           | -0.373  |

**Supplementary Table 12. Examples of the most significant  $f_3$  statistics for various breeds of African and European taurine cattle, with Indian indicine cattle as one of the source populations. Only breeds with more than one sample were considered as test populations in the three-population tests.**

| Pop A<br>(Source population) | Pop B<br>(Source population) | Pop C<br>(Admixed population) | $f_3$ statistics | Standard<br>error | Z-score |
|------------------------------|------------------------------|-------------------------------|------------------|-------------------|---------|
| Holstein                     | Nelore                       | Ankole                        | -0.07601         | 0.00184           | -41.256 |
| Limousin                     | Nelore                       | Ankole                        | -0.07543         | 0.00181           | -41.561 |
| MaineAnjou                   | Nelore                       | Ankole                        | -0.07531         | 0.00186           | -40.382 |
| Simmental                    | Nelore                       | Ankole                        | -0.07464         | 0.00179           | -41.512 |
| Angus                        | Nelore                       | Ankole                        | -0.07453         | 0.00183           | -40.618 |
| Simmental                    | Nelore                       | Shorthorn Zebu                | -0.06405         | 0.00177           | -36.1   |
| MaineAnjou                   | Nelore                       | Shorthorn Zebu                | -0.06376         | 0.00178           | -35.644 |
| Holstein                     | Nelore                       | Shorthorn Zebu                | -0.06364         | 0.00177           | -35.909 |
| Gelbvieh                     | Nelore                       | Shorthorn Zebu                | -0.06336         | 0.00178           | -35.552 |
| Piedmontese                  | Nelore                       | Shorthorn Zebu                | -0.06321         | 0.00177           | -35.581 |

**Supplementary Table 13. Examples of the most significant  $f_3$  statistics for various cattle breeds of North-Central China, with Chinese indicine cattle (Leiqiong) as one of the source populations. Only breeds with more than one sample were considered as test populations in the three-population tests.**

| Pop A (Source population) | Pop B (Source population) | Pop C (Admixed population) | $f_3$ statistics | Standard error | Z-score |
|---------------------------|---------------------------|----------------------------|------------------|----------------|---------|
| Hanwoo                    | Leiqiong                  | Bashan                     | -0.1074          | 0.001397       | -76.958 |
| Hereford                  | Leiqiong                  | Bashan                     | -0.1065          | 0.001404       | -75.866 |
| Holstein                  | Leiqiong                  | Bashan                     | -0.1064          | 0.001418       | -75.062 |
| Angus                     | Leiqiong                  | Bashan                     | -0.1062          | 0.001404       | -75.697 |
| Piedmontese               | Leiqiong                  | Bashan                     | -0.1059          | 0.001422       | -74.522 |
| Angus                     | Leiqiong                  | Bohai Black                | -0.1070          | 0.001698       | -63.036 |
| Hereford                  | Leiqiong                  | Bohai Black                | -0.1068          | 0.001677       | -63.719 |
| Holstein                  | Leiqiong                  | Bohai Black                | -0.1064          | 0.001693       | -62.882 |
| Jersey                    | Leiqiong                  | Bohai Black                | -0.1061          | 0.001724       | -61.568 |
| Simmental                 | Leiqiong                  | Bohai Black                | -0.1053          | 0.001698       | -62.075 |
| Hereford                  | Leiqiong                  | Dabieshan                  | -0.0517          | 0.002339       | -22.14  |
| Salers                    | Leiqiong                  | Dabieshan                  | -0.0514          | 0.002367       | -21.737 |
| Hanwoo                    | Leiqiong                  | Dabieshan                  | -0.0514          | 0.002336       | -22.018 |
| Holstein                  | Leiqiong                  | Dabieshan                  | -0.0514          | 0.002342       | -21.96  |
| Piedmontese               | Leiqiong                  | Dabieshan                  | -0.0513          | 0.002344       | -21.915 |
| Angus                     | Leiqiong                  | Jiaxian Red                | -0.1137          | 0.001492       | -76.236 |
| Hereford                  | Leiqiong                  | Jiaxian Red                | -0.1136          | 0.001493       | -76.142 |
| Holstein                  | Leiqiong                  | Jiaxian Red                | -0.1133          | 0.001519       | -74.62  |
| Limousin                  | Leiqiong                  | Jiaxian Red                | -0.1133          | 0.001553       | -72.96  |
| Jersey                    | Leiqiong                  | Jiaxian Red                | -0.1128          | 0.001535       | -73.492 |
| Hanwoo                    | Leiqiong                  | Lingnan                    | -0.1069          | 0.001339       | -79.832 |
| Hereford                  | Leiqiong                  | Lingnan                    | -0.1064          | 0.001344       | -79.17  |
| Holstein                  | Leiqiong                  | Lingnan                    | -0.1061          | 0.001348       | -78.703 |
| Red Angus                 | Leiqiong                  | Lingnan                    | -0.1060          | 0.001355       | -78.31  |
| Jersey                    | Leiqiong                  | Lingnan                    | -0.1058          | 0.001336       | -79.287 |
| Hereford                  | Leiqiong                  | Luxi                       | -0.0903          | 0.002112       | -42.786 |
| Simmental                 | Leiqiong                  | Luxi                       | -0.0903          | 0.002121       | -42.58  |
| Angus                     | Leiqiong                  | Luxi                       | -0.0900          | 0.002103       | -42.829 |
| Holstein                  | Leiqiong                  | Luxi                       | -0.0895          | 0.002111       | -42.448 |
| Piedmontese               | Leiqiong                  | Luxi                       | -0.0895          | 0.002109       | -42.468 |
| Hereford                  | Leiqiong                  | Nanyang                    | -0.1243          | 0.001424       | -87.309 |
| Gelbvieh                  | Leiqiong                  | Nanyang                    | -0.1240          | 0.001422       | -87.251 |
| Jersey                    | Leiqiong                  | Nanyang                    | -0.1239          | 0.001439       | -86.102 |
| Simmental                 | Leiqiong                  | Nanyang                    | -0.1239          | 0.00143        | -86.661 |

---

|             |          |         |         |          |         |
|-------------|----------|---------|---------|----------|---------|
| Angus       | Leiqiong | Nanyang | -0.1237 | 0.001416 | -87.354 |
| Holstein    | Leiqiong | Wandong | -0.1183 | 0.002007 | -58.974 |
| Angus       | Leiqiong | Wandong | -0.1174 | 0.001992 | -58.984 |
| RedAngus    | Leiqiong | Wandong | -0.1174 | 0.002012 | -58.355 |
| Hereford    | Leiqiong | Wandong | -0.1165 | 0.001985 | -58.717 |
| Piedmontese | Leiqiong | Wandong | -0.1160 | 0.002004 | -57.907 |
| Holstein    | Leiqiong | Weining | -0.1162 | 0.001599 | -72.693 |
| Hereford    | Leiqiong | Weining | -0.1150 | 0.001585 | -72.58  |
| Angus       | Leiqiong | Weining | -0.1149 | 0.001584 | -72.605 |
| Jersey      | Leiqiong | Weining | -0.1140 | 0.001578 | -72.267 |
| Piedmontese | Leiqiong | Weining | -0.1136 | 0.00159  | -71.522 |
| Simmental   | Leiqiong | Zaobei  | -0.0989 | 0.001834 | -53.944 |
| Hereford    | Leiqiong | Zaobei  | -0.0988 | 0.001839 | -53.738 |
| Angus       | Leiqiong | Zaobei  | -0.0985 | 0.001823 | -54.06  |
| Jersey      | Leiqiong | Zaobei  | -0.0983 | 0.00182  | -54.006 |
| Holstein    | Leiqiong | Zaobei  | -0.0982 | 0.001829 | -53.715 |

---

**Supplementary Table 14. Number of significant and non-significant three-population tests for each breed. A total of 741 tests were conducted for all possible combination of reference populations. A lack of significant tests from all possible combinations indicates isolated breed structure or high post-admixture drift, whereas an abundance of significant tests indicates that a breed (test population) is admixed or has a complex population history.**

| Breed          | Region               | No. of non-significant tests | No. of significant tests |
|----------------|----------------------|------------------------------|--------------------------|
| Hereford       | West Europe          | 741                          | 0                        |
| Holstein       | West Europe          | 741                          | 0                        |
| Angus          | West Europe          | 741                          | 0                        |
| Red Angus      | West Europe          | 741                          | 0                        |
| Jersey         | West Europe          | 741                          | 0                        |
| Maine Anjou    | Central-South Europe | 741                          | 0                        |
| Charolais      | Central-South Europe | 699                          | 42                       |
| Piedmontese    | Central-South Europe | 741                          | 0                        |
| Gelbvieh       | Central-South Europe | 741                          | 0                        |
| Simmental      | Central-South Europe | 741                          | 0                        |
| Kazakh         | Northwest China      | 510                          | 231                      |
| Mongolia       | Northwest China      | 484                          | 257                      |
| Chaidamu       | Northwest China      | 741                          | 0                        |
| Tibetan        | Tibet                | 741                          | 0                        |
| Mishima        | Northeast Asia       | 741                          | 0                        |
| Hanwoo         | Northeast Asia       | 720                          | 21                       |
| Luxi Cattle    | Central-North China  | 594                          | 147                      |
| Jiaxian Red    | Central-North China  | 406                          | 335                      |
| Bohai Black    | Central-North China  | 377                          | 364                      |
| Nanyang        | Central-North China  | 447                          | 294                      |
| Bashan         | Central-North China  | 442                          | 299                      |
| Lingnan        | Central-North China  | 533                          | 208                      |
| Wandong        | Central-North China  | 473                          | 268                      |
| Zaobei         | Central-North China  | 544                          | 197                      |
| Dabieshan      | Central-North China  | 630                          | 111                      |
| Weining        | Central-North China  | 487                          | 254                      |
| Dianzhong      | South China          | 611                          | 130                      |
| Wenshan        | South China          | 736                          | 5                        |
| Jinjiang       | South China          | 621                          | 120                      |
| Guangfeng      | South China          | 672                          | 69                       |
| Ji'an          | South China          | 713                          | 28                       |
| Wannan         | South China          | 741                          | 0                        |
| Leiqiong       | South China          | 741                          | 0                        |
| Gir            | India-Pakistan       | 741                          | 0                        |
| Nelore         | America              | 741                          | 0                        |
| Brahman        | America              | 683                          | 58                       |
| Shorthorn Zebu | Africa               | 595                          | 146                      |
| Ankole         | Africa               | 537                          | 204                      |

**Supplementary Table 15. Five “core” cattle groups of different ancestry composition.**

| Ancestry composition | Number | Individuals                                                                                                                                                                                                                                                                                                                  |
|----------------------|--------|------------------------------------------------------------------------------------------------------------------------------------------------------------------------------------------------------------------------------------------------------------------------------------------------------------------------------|
| European taurine     | 28     | Angus01, Angus02, Angus03, Angus04, Angus05, Angus06, Angus07, Angus08, Angus09, Red Angus01, Red Angus02, Red Angus03, Red Angus04, Red Angus05, Red Angus06, Red Angus07, Red Angus08, Red Angus09, Hereford01, Hereford02, Hereford03, Hereford04, Hereford05, Hereford06, Hereford07, Hereford08, Hereford09, Hereford10 |
| Eurasian taurine     | 21     | Jersey01, Jersey02, Jersey03, Limousin, Piedmontese01, Piedmontese02, Piedmontese03, Piedmontese04, Piedmontese05, Gelbvieh05, Gelbvieh06, Gelbvieh07, Gelbvieh08, Simmental01, Simmental03, Simmental05, Simmental06, Simmental07, Simmental08, Simmental09, Simmental10                                                    |
| East Asian taurine   | 24     | Hanwoo01, Hanwoo02, Hanwoo03, Hanwoo04, Hanwoo05, Hanwoo06, Hanwoo07, Hanwoo08, Hanwoo09, Hanwoo10, Hanwoo11, Hanwoo12, Hanwoo13, Hanwoo14, Hanwoo15, Yanbian, Tibetan03, Tibetan04, Tibetan05, Tibetan07, Mishima01, Mishima02, Mishima03, Mishima04                                                                        |
| Indian indicine      | 19     | Brahman01, Brahman02, Brahman03, Brahman04, Brahman05, Brahman06, Brahman07, Brahman08, Gir01, Gir02, Gir03, Gir04, Nelore01, Nelore02, Nelore03, Nelore04, Hariana, Sahiwal, Tharparkar                                                                                                                                     |
| Chinese indicine     | 17     | Wannan01, Wannan02, Wannan03, Wannan04, Wannan05, Guangfeng01, Guangfeng02, Guangfeng03, Guangfeng04, Ji'an01, Ji'an02, Ji'an03, Ji'an04, Jingjiang01, Leiqiong01, Leiqiong02, Leiqiong03                                                                                                                                    |

**Supplementary Table 16. Results of the *D* statistics tests performed to detect admixtures from ancient Chinese cattle (Y) to either W (Angus) or X. Negative *D* statistics indicate that gene flow has occurred from Y to X, and positive *D* statistics indicate that gene flow has occurred from Y to W. Significant Z-values are in bold fonts.**

| W     | X            | Y       | Z       | <i>D</i> statistic | Z-value        |
|-------|--------------|---------|---------|--------------------|----------------|
| Angus | Kuchinoshima | Ancient | Buffalo | -0.0566            | <b>-8.221</b>  |
| Angus | Mishima      | Ancient | Buffalo | -0.0503            | <b>-7.902</b>  |
| Angus | Hereford     | Ancient | Buffalo | -0.0384            | <b>-10.957</b> |
| Angus | Hanwoo       | Ancient | Buffalo | -0.0361            | <b>-8.475</b>  |
| Angus | Yanbian      | Ancient | Buffalo | -0.0207            | <b>-3.128</b>  |
| Angus | Jersey       | Ancient | Buffalo | -0.0074            | <b>-1.856</b>  |
| Angus | Piedmontese  | Ancient | Buffalo | -0.0063            | <b>-1.887</b>  |
| Angus | Holstein     | Ancient | Buffalo | 0.0122             | 3.809          |
| Angus | MaineAnjou   | Ancient | Buffalo | 0.0156             | 5.046          |
| Angus | Limousin     | Ancient | Buffalo | 0.0162             | 3.773          |
| Angus | Simmental    | Ancient | Buffalo | 0.0178             | 5.153          |
| Angus | Gelbvieh     | Ancient | Buffalo | 0.0199             | 6.433          |
| Angus | Charolais    | Ancient | Buffalo | 0.0461             | 10.082         |
| Angus | Tibetan      | Ancient | Buffalo | 0.09               | 12.890         |
| Angus | Kazakh       | Ancient | Buffalo | 0.103              | 25.809         |
| Angus | Chaidamu     | Ancient | Buffalo | 0.157              | 21.941         |
| Angus | Mongolian    | Ancient | Buffalo | 0.2107             | 40.342         |
| Angus | Bohai Black  | Ancient | Buffalo | 0.294              | 46.699         |
| Angus | Jiaxian Red  | Ancient | Buffalo | 0.4086             | 67.782         |
| Angus | Nanyang      | Ancient | Buffalo | 0.4845             | 100.000        |
| Angus | Ankole       | Ancient | Buffalo | 0.4861             | 87.970         |
| Angus | Luxi         | Ancient | Buffalo | 0.4895             | 81.984         |
| Angus | Wandong      | Ancient | Buffalo | 0.5217             | 74.588         |
| Angus | Weining      | Ancient | Buffalo | 0.5248             | 100.000        |
| Angus | Bashan       | Ancient | Buffalo | 0.5637             | 100.000        |
| Angus | Lingnan      | Ancient | Buffalo | 0.5803             | 100.000        |
| Angus | Zaobei       | Ancient | Buffalo | 0.6046             | 100.000        |
| Angus | Dabieshan    | Ancient | Buffalo | 0.7038             | 100.000        |
| Angus | Jingjiang    | Ancient | Buffalo | 0.7317             | 100.000        |
| Angus | Guangfeng    | Ancient | Buffalo | 0.7479             | 100.000        |
| Angus | Wannan       | Ancient | Buffalo | 0.7577             | 100.000        |
| Angus | Ji'an        | Ancient | Buffalo | 0.7681             | 100.000        |
| Angus | Leiqiong     | Ancient | Buffalo | 0.7845             | 100.000        |



**Supplementary Table 17. Chinese indicine-specific SNPs shared by different extant species in the tribe of Bovini. A total of 12,696,752 SNPs were specific to Chinese indicine cattle compared with the other four “core” cattle groups (Europe taurine, Eurasian taurine, East Asian taurine, and Indian indicine). *Total shared* represents the cumulative number of shared Chinese indicine specific SNPs in different species in the tribe of Bovini.**

| Species                | Shared SNPs |           |           |           |           |           |           |
|------------------------|-------------|-----------|-----------|-----------|-----------|-----------|-----------|
| <i>Bos javanicus</i>   | 4,669,638   | 4,669,638 | 4,669,638 | 4,669,638 | 4,669,638 | 4,669,638 | 4,669,638 |
| <i>Bos taurus</i>      |             | 3,661,861 | 3,661,861 | 3,661,861 | 3,661,861 | 3,661,861 | 3,661,861 |
| <i>Bos frontalis</i>   |             |           | 3,532,177 | 3,532,177 | 3,532,177 | 3,532,177 | 3,532,177 |
| <i>Bison bonasus</i>   |             |           |           | 2,241,654 | 2,241,654 | 2,241,654 | 2,241,654 |
| <i>Bison bison</i>     |             |           |           |           | 2,206,222 | 2,206,222 | 2,206,222 |
| <i>Bos grunniens</i>   |             |           |           |           |           | 2,379,053 | 2,379,053 |
| <i>Bubalus bubalis</i> |             |           |           |           |           |           | 2,100,288 |
| Total shared           | 4,669,638   | 6,197,006 | 6,814,297 | 6,978,772 | 7,015,018 | 7,126,744 | 7,309,508 |
| Unshared               | 8,027,114   | 6,499,746 | 5,882,455 | 5,717,980 | 5,681,734 | 5,570,008 | 53,87,244 |

**Supplementary Table 18. Most negative and significant  $f_3$  statistics for various of genus of *Bos* and *Bison*, with Chinese indicine cattle as the target population and *Bos javanicus* as one of the source population.**

| Source1                | Source2          | Target                  | $f_3$          | Standard error | Z-score       |
|------------------------|------------------|-------------------------|----------------|----------------|---------------|
| <b>Indian indicine</b> | <b>Banteng</b>   | <b>Chinese indicine</b> | <b>-0.0558</b> | <b>0.0020</b>  | <b>-26.97</b> |
| Indian indicine        | Gaur             | Chinese indicine        | -0.0291        | 0.0017         | -16.91        |
| Indian indicine        | Gayal            | Chinese indicine        | -0.0105        | 0.0021         | -5.02         |
| Indian indicine        | Wisent           | Chinese indicine        | -0.0088        | 0.0014         | -6.01         |
| Indian indicine        | Yak              | Chinese indicine        | -0.0079        | 0.0014         | -5.35         |
| Indian indicine        | Bison            | Chinese indicine        | -0.0051        | 0.0015         | -3.26         |
| Indian indicine        | European taurine | Chinese indicine        | 0.0833         | 0.0019         | 42.68         |

**Supplementary Table 19. The result of *D* statistic tests performed to detect admixture from species of the tribe of Bovini (Y) to either W or X. Negative *D* statistic values indicate that gene flow has occurred from Y to X, and positive *D* statistic values indicate that gene flow has occurred from Y to W.**

| W                      | X                       | Y              | Z              | <i>D</i> statistic | Z-value        |
|------------------------|-------------------------|----------------|----------------|--------------------|----------------|
| <b>Indian indicine</b> | <b>Chinese indicine</b> | <b>Banteng</b> | <b>Buffalo</b> | <b>-0.274</b>      | <b>-51.542</b> |
| Indian indicine        | Chinese indicine        | Gaur           | Buffalo        | -0.165             | -53.632        |
| Indian indicine        | Chinese indicine        | Wisent         | Buffalo        | -0.060             | -42.609        |
| Indian indicine        | Chinese indicine        | Yak            | Buffalo        | -0.060             | -35.352        |
| Indian indicine        | Chinese indicine        | Gayal          | Buffalo        | -0.055             | -7.798         |
| Indian indicine        | Chinese indicine        | Bison          | Buffalo        | -0.039             | -11.840        |
| European taurine       | Chinese indicine        | Banteng        | Buffalo        | -0.281             | -52.476        |

**Supplementary Table 20. Statistics on introgressed intervals for 17 Chinese indicine cattle. The following values are shown for each core Chinese indicine cattle: the number of introgressed intervals (Count); the minimal (Min), maximal (Max), mean (Mean) and sum (Sum) of introgressed interval lengths. The proportion of the cattle genome that is introgressed (proportion).**

| Number | Sample             | Count | Introgression Interval length |           |         |             | Proportion |
|--------|--------------------|-------|-------------------------------|-----------|---------|-------------|------------|
|        |                    |       | Min                           | Max       | Mean    | Sum         |            |
| 1      | Leiqiong01         | 422   | 2,780                         | 4,469,509 | 377,755 | 159,412,628 | 0.03160    |
| 2      | Leiqiong02         | 600   | 2,894                         | 2,408,128 | 262,561 | 157,537,079 | 0.02847    |
| 3      | Leiqiong03         | 505   | 2,974                         | 2,415,827 | 284,422 | 143,633,351 | 0.03123    |
| 4      | Guangfeng01        | 439   | 934                           | 4,000,863 | 273,358 | 120,004,243 | 0.02379    |
| 5      | Guangfeng02        | 427   | 2,802                         | 4,078,722 | 323,439 | 138,108,727 | 0.02738    |
| 6      | Guangfeng03        | 449   | 2,439                         | 2,422,378 | 270,036 | 121,246,368 | 0.02404    |
| 7      | Guangfeng04        | 495   | 2,439                         | 3,694,015 | 313,889 | 155,375,272 | 0.03080    |
| 8      | Ji'an01            | 534   | 3,104                         | 2,415,827 | 267,835 | 143,024,355 | 0.02835    |
| 9      | Ji'an02            | 440   | 4,269                         | 2,674,867 | 295,351 | 129,954,678 | 0.02576    |
| 10     | Ji'an03            | 420   | 3,259                         | 3,274,144 | 301,378 | 126,578,961 | 0.02509    |
| 11     | Ji'an04            | 468   | 1,349                         | 2,227,940 | 280,785 | 131,407,552 | 0.02605    |
| 12     | Jinjiang01         | 465   | 2,780                         | 2,400,236 | 264,900 | 123,178,922 | 0.02442    |
| 13     | Wannan01           | 519   | 2,439                         | 3,688,508 | 311,523 | 161,680,654 | 0.03205    |
| 14     | Wannan02           | 603   | 1,349                         | 3,683,034 | 318,472 | 192,038,687 | 0.03807    |
| 15     | Wannan03           | 465   | 3,135                         | 3,688,508 | 305,842 | 142,216,994 | 0.02819    |
| 16     | Wannan04           | 548   | 2,439                         | 4,050,313 | 310,260 | 170,022,558 | 0.03371    |
| 17     | Wannan05           | 607   | 2,439                         | 3,172,076 | 319,446 | 193,904,273 | 0.03844    |
|        | Max                | 607   | 4,269                         | 4,469,509 | 377,755 | 193,904,273 | 0.03844    |
|        | Min                | 420   | 934                           | 2,227,940 | 262,561 | 120,004,243 | 0.02379    |
|        | Mean               | 494   | 2,578                         | 3,221,464 | 298,897 | 147,607,371 | 0.02926    |
|        | Standard deviation | 64    | 795                           | 750,967   | 29,230  | 22,833,985  | 0.00453    |
|        | Standard error     | 15    | 192                           | 182,136   | 7,089   | 5,538,054   | 0.00109    |

**Supplementary Table 21. List of introgression intervals from *Bos javanicus* into Chinese indicine cattle detected by RFMix analyses and were shared by at least two haplotypes**

Chromosome (Btau\_5.0.1) start and end positions and number of introgressed haplotype (Hap(n)) and gene content of introgressed intervals.

| Chr | Start (bp) | End (bp)  | Length (bp) | Hap (n) | GeneID                                                                                                                                                                                                                                                        |
|-----|------------|-----------|-------------|---------|---------------------------------------------------------------------------------------------------------------------------------------------------------------------------------------------------------------------------------------------------------------|
| 1   | 3741155    | 4352533   | 611379      | 2       | <i>KRTAP11-1, KRTAP7-1, LOC101906247, LOC101906373, LOC101907866, LOC101907950, LOC525831, LOC782140, LOC785105</i>                                                                                                                                           |
| 1   | 6336595    | 10025102  | 3688508     | 3       | <i>ADAMTS1, ADAMTS5, APP, CCT8, CYR1, LOC100138661, LOC100337436, LOC100851369, LOC104970784, LOC104970786, LOC104970788, LOC104970790, LOC107131365, LOC107132174, LOC526789, LOC615183, LTN1, MAP3K7CL, N6AMT1, RWDD2B, TRNAR-CCU, USP16</i>                |
| 1   | 10025102   | 10327999  | 302898      | 4       | <i>ATP5J, GABPA, JAM2, MIR155, MRPL39, TRNAQ-UUG</i>                                                                                                                                                                                                          |
| 1   | 10327999   | 11072293  | 744295      | 2       | <i>LOC783459</i>                                                                                                                                                                                                                                              |
| 1   | 12457358   | 12488462  | 31105       | 4       | .                                                                                                                                                                                                                                                             |
| 1   | 12488462   | 12966974  | 478513      | 4       | .                                                                                                                                                                                                                                                             |
| 1   | 12966974   | 13604661  | 637688      | 2       | .                                                                                                                                                                                                                                                             |
| 1   | 13604661   | 13745095  | 140435      | 5       | .                                                                                                                                                                                                                                                             |
| 1   | 13745095   | 14586602  | 841508      | 4       | .                                                                                                                                                                                                                                                             |
| 1   | 14586602   | 14699627  | 113026      | 2       | .                                                                                                                                                                                                                                                             |
| 1   | 14699627   | 15107801  | 408175      | 2       | <i>NCAM2</i>                                                                                                                                                                                                                                                  |
| 1   | 16475220   | 16480530  | 5311        | 7       | .                                                                                                                                                                                                                                                             |
| 1   | 16480530   | 16606207  | 125678      | 8       | .                                                                                                                                                                                                                                                             |
| 1   | 26554467   | 28203209  | 1648743     | 10      | <i>LOC100848584, LOC101907726, ROBO1, TRNAC-ACA</i>                                                                                                                                                                                                           |
| 1   | 30979742   | 31242429  | 262688      | 5       | .                                                                                                                                                                                                                                                             |
| 1   | 31242429   | 31709360  | 466932      | 7       | .                                                                                                                                                                                                                                                             |
| 1   | 31709360   | 32032388  | 323029      | 4       | .                                                                                                                                                                                                                                                             |
| 1   | 35201160   | 38475303  | 3274144     | 2       | <i>ARL13B, C1H3orf38, CGGBP1, EPHA3, HTR1F, LOC100335242, LOC101904492, LOC104970809, LOC107132179, NSUN3, PROS1, STX19</i>                                                                                                                                   |
| 1   | 38475303   | 39823639  | 1348337     | 4       | <i>LOC617944</i>                                                                                                                                                                                                                                              |
| 1   | 41498072   | 42232848  | 734777      | 2       | <i>ARL6, CRYBG3, EPHA6, GABRR3, LOC100138923, LOC100140523, LOC100140741, LOC101905242, LOC101905413, LOC101905600, LOC101906449, LOC104970812, LOC104970813, LOC783514, LOC783578, LOC783655, LOC783812, LOC783843, LOC783884, MINA, OR5A2, OR5H6, OR5K3</i> |
| 1   | 42232848   | 42287871  | 55024       | 2       | <i>LOC100139155, LOC783917, LOC783950</i>                                                                                                                                                                                                                     |
| 1   | 42287871   | 42321999  | 34129       | 2       | <i>LOC100140204, LOC789957</i>                                                                                                                                                                                                                                |
| 1   | 43675905   | 44587960  | 912056      | 8       | <i>CMSS1, COL8A1, FILIP1L, LNP1, LOC107132180, LOC529036, NIT2, TBC1D23, TMEM30C, TOMM70A</i>                                                                                                                                                                 |
| 1   | 44587960   | 44645808  | 57849       | 6       | <i>LOC529036</i>                                                                                                                                                                                                                                              |
| 1   | 45852418   | 45972871  | 120454      | 4       | <i>ABI3BP, LOC104970828</i>                                                                                                                                                                                                                                   |
| 1   | 45972871   | 46323349  | 350479      | 3       | <i>IMP2, SENP7</i>                                                                                                                                                                                                                                            |
| 1   | 50275098   | 53969112  | 3694015     | 2       | <i>ALCAM, BBX, CBLB, CCDC54, CD47, DZIP3, HHLA2, IFT57, KIAA1524, LOC100296365, LOC100848469, LOC100848494, LOC101910021, LOC104970838, LOC104970840, LOC781370, LOC783477, LOC785980, MIR2286, MYH15, TMSB4</i>                                              |
| 1   | 53969112   | 54032710  | 63599       | 2       | <i>DZIP3</i>                                                                                                                                                                                                                                                  |
| 1   | 54032710   | 54631881  | 599172      | 5       | <i>GUCA1C, LOC100297006, LOC101903052, MORC1, TRAT1, TRNAC-GCA</i>                                                                                                                                                                                            |
| 1   | 54631881   | 55548551  | 916671      | 3       | <i>DPPA2, DPPA4, LOC100337136, LOC614129, LOC782629, LOC783844</i>                                                                                                                                                                                            |
| 1   | 58842657   | 59881348  | 1038692     | 2       | <i>ATP6V1A, CCDC191, DRD3, GRAMD1C, LOC100337152, LOC101908760, MIR568, NAA50, QTRTD1, SIDT1, TIGIT, USF3, ZBTB20, ZDHHC23</i>                                                                                                                                |
| 1   | 61594908   | 61900615  | 305708      | 2       | <i>LSAMP, TRNAK-UUU</i>                                                                                                                                                                                                                                       |
| 1   | 67072811   | 67682813  | 610003      | 7       | <i>CASR, CCDC58, CD86, CSTA, EAF2, FAM162A, ILDR1, IQCB1, LOC101908792, LOC104970874, LOC104970876, LOC104970885, LOC516421, SLC15A2, WDR5B</i>                                                                                                               |
| 1   | 67682813   | 67707380  | 24568       | 5       | <i>CCDC58</i>                                                                                                                                                                                                                                                 |
| 1   | 69169609   | 70158055  | 988447      | 5       | <i>CCDC14, ITGB5, KALRN, LOC101905265, ROPN1, UMPS</i>                                                                                                                                                                                                        |
| 1   | 70158055   | 70508133  | 350079      | 5       | <i>HEG1, ITGB5, MUC13, SLC12A8</i>                                                                                                                                                                                                                            |
| 1   | 74798762   | 76057452  | 1258691     | 5       | <i>ATP13A4, ATP13A5, FGF12, HRASLS, LOC104970906, MB21D2</i>                                                                                                                                                                                                  |
| 1   | 99785149   | 100365175 | 580027      | 2       | <i>LOC100139843, LOC107131228, MIR551B</i>                                                                                                                                                                                                                    |
| 1   | 110867173  | 112061776 | 1194604     | 2       | <i>CCNL1, LEKR1, PTX3, TRNAW-CCA, VEPH1</i>                                                                                                                                                                                                                   |
| 1   | 112061776  | 112545103 | 483328      | 4       | <i>KCNAB1, LEKR1, LOC101902535, SSR3, TIPARP, TRNAE-UUC, TRNAQ-CUG</i>                                                                                                                                                                                        |
| 1   | 119415091  | 119543574 | 128484      | 6       | <i>LOC101905340</i>                                                                                                                                                                                                                                           |
| 1   | 120917814  | 121561995 | 644182      | 2       | <i>LOC104968807, LOC781192</i>                                                                                                                                                                                                                                |
| 1   | 121561995  | 122951858 | 1389864     | 3       | <i>LOC100139345, LOC100295922, LOC101905819, LOC101906885, LOC786256, TRNAC-ACA, ZIC1, ZIC4</i>                                                                                                                                                               |
| 1   | 122951858  | 123537204 | 585347      | 2       | <i>LOC104971015, LOC107132207, LOC782279, PLSCR1, PLSCR5</i>                                                                                                                                                                                                  |
| 1   | 141137637  | 141745751 | 608115      | 3       | <i>BRWD1, HMG1, LCA5L, LOC534913, PSMG1, SH3BGR, WRB</i>                                                                                                                                                                                                      |
| 1   | 144643604  | 145122423 | 478820      | 3       | <i>LOC101905728, PDE9A, RSPH1, SLC37A1, TFF1, TFF2, TMPRSS3, UBASH3A</i>                                                                                                                                                                                      |
| 2   | 6762076    | 7067052   | 304977      | 2       | <i>LOC100848294, LOC101905730, LOC101906294, WDR75</i>                                                                                                                                                                                                        |
| 2   | 7067052    | 7985124   | 918073      | 5       | <i>COL3A1, COL5A2, GULP1, LOC100140504, LOC104971110, MIR2917</i>                                                                                                                                                                                             |
| 2   | 9607147    | 9679430   | 72284       | 3       | <i>FAM171B, ITGAV</i>                                                                                                                                                                                                                                         |
| 2   | 9679430    | 9938129   | 258700      | 7       | <i>ITGAV, LOC104971113, LOC107132235, MIR2351, TRNAG-UCC, ZC3H15</i>                                                                                                                                                                                          |
| 2   | 9938129    | 9977653   | 39525       | 6       | .                                                                                                                                                                                                                                                             |
| 2   | 9977653    | 10167704  | 190052      | 5       | .                                                                                                                                                                                                                                                             |
| 2   | 10167704   | 10187315  | 19612       | 5       | .                                                                                                                                                                                                                                                             |
| 2   | 10187315   | 10318606  | 131292      | 5       | .                                                                                                                                                                                                                                                             |
| 2   | 10318606   | 10768140  | 449535      | 3       | <i>FSIP2, LOC100139132</i>                                                                                                                                                                                                                                    |
| 2   | 10768140   | 11052136  | 283997      | 3       | .                                                                                                                                                                                                                                                             |
| 2   | 11052136   | 11244889  | 192754      | 3       | <i>LOC100138706</i>                                                                                                                                                                                                                                           |
| 2   | 12587933   | 12955788  | 367856      | 5       | <i>LOC101907972</i>                                                                                                                                                                                                                                           |
| 2   | 12955788   | 13139828  | 184041      | 5       | <i>LOC100848878, LOC787311</i>                                                                                                                                                                                                                                |
| 2   | 13139828   | 13159357  | 19530       | 5       | .                                                                                                                                                                                                                                                             |
| 2   | 13159357   | 14480109  | 1320753     | 8       | <i>DNAJC10, DUSP19, FRZB, LOC101905179, LOC107132237, NCKAP1, NUP35, PDE1A, TRNAC-GCA</i>                                                                                                                                                                     |
| 2   | 14480109   | 14497141  | 17033       | 4       | <i>PDE1A</i>                                                                                                                                                                                                                                                  |
| 2   | 14497141   | 14515364  | 18224       | 3       | <i>PDE1A</i>                                                                                                                                                                                                                                                  |
| 2   | 14515364   | 14985968  | 470605      | 3       | <i>LOC101907472, LOC104971118, PDE1A, PPP1R1C, SSFA2</i>                                                                                                                                                                                                      |
| 2   | 19563640   | 19578540  | 14901       | 2       | .                                                                                                                                                                                                                                                             |

|   |           |           |         |   |                                                                                                                                                                                                                                                                                                                                                                                                |
|---|-----------|-----------|---------|---|------------------------------------------------------------------------------------------------------------------------------------------------------------------------------------------------------------------------------------------------------------------------------------------------------------------------------------------------------------------------------------------------|
| 2 | 19578540  | 19654032  | 75493   | 4 | AGPS                                                                                                                                                                                                                                                                                                                                                                                           |
| 2 | 28742126  | 29511210  | 769085  | 2 | B3GALT1, MIR2285W, XIRP2                                                                                                                                                                                                                                                                                                                                                                       |
| 2 | 29619238  | 30921250  | 1302013 | 4 | CSRNP3, GALNT3, LOC100141080, LOC104971177, LOC104971179, LOC104971180, LOC107132249, LOC107132250, LOC780963, LOC787863, SCN1A, SCN7A, SCN9A, TTC21B                                                                                                                                                                                                                                          |
| 2 | 30921250  | 33343627  | 2422378 | 2 | COBLL1, FIGN, GRB14, LOC101904870, LOC104971181, LOC104971229, LOC107131350, LOC107132251, LOC534223, SCN2A, SLC38A11, TRNAC-GCA                                                                                                                                                                                                                                                               |
| 2 | 33343627  | 33966988  | 623362  | 2 | KCNH7                                                                                                                                                                                                                                                                                                                                                                                          |
| 2 | 35743324  | 36177070  | 433747  | 3 | LOC101906588, RBMS1                                                                                                                                                                                                                                                                                                                                                                            |
| 2 | 36177070  | 37728548  | 1551479 | 3 | BAZ2B, CD302, DAPL1, ITGB6, LOC101906513, LOC101906908, LOC107132253, LOC781943, LY75, MARCH7, PLA2R1, RBMS1, TANC1, WDSUB1                                                                                                                                                                                                                                                                    |
| 2 | 37728548  | 38516481  | 787934  | 5 | CCDC148, DAPL1, LOC107132254, PKP4, TRNAC-GCA, UPP2                                                                                                                                                                                                                                                                                                                                            |
| 2 | 38516481  | 40924608  | 2408128 | 2 | ACVR1, ACVR1C, CYTIP, ERMN, GALNT5, GPD2, LOC101907729, LOC101907802, NR4A2, TRNAA-CGC, TRNAC-ACA, TRNAC-GCA, TRNAG-GCC                                                                                                                                                                                                                                                                        |
| 2 | 54779176  | 54791168  | 11993   | 2 | LOC101908745                                                                                                                                                                                                                                                                                                                                                                                   |
| 2 | 54791168  | 54822604  | 31437   | 2 | LOC104971226, LOC107132257                                                                                                                                                                                                                                                                                                                                                                     |
| 2 | 54822604  | 56108710  | 1286107 | 3 | LOC101904447, LOC107132258, LOC107132259                                                                                                                                                                                                                                                                                                                                                       |
| 2 | 56108710  | 56688313  | 579604  | 3 | LOC101908548, TRNAC-GCA                                                                                                                                                                                                                                                                                                                                                                        |
| 2 | 56688313  | 57570924  | 882612  | 5 | LOC107131283, LOC782142, LRP1B                                                                                                                                                                                                                                                                                                                                                                 |
| 2 | 65232852  | 66493943  | 1261092 | 2 | ACTR3, GPR39, LOC100847374, LOC101903503, LYPD1, NCKAP5, SLC35F5                                                                                                                                                                                                                                                                                                                               |
| 2 | 66493943  | 67907416  | 1413474 | 2 | DPP10, LOC101904117, LOC101904159, LOC107132266, LOC781274, MIR2887-1, MIR2904-1                                                                                                                                                                                                                                                                                                               |
| 2 | 67907416  | 68227197  | 319782  | 8 | DPP10, LOC101904919                                                                                                                                                                                                                                                                                                                                                                            |
| 2 | 68227197  | 68549782  | 322586  | 9 | DPP10                                                                                                                                                                                                                                                                                                                                                                                          |
| 2 | 68549782  | 68641750  | 91969   | 7 | LOC101904311                                                                                                                                                                                                                                                                                                                                                                                   |
| 2 | 68641750  | 68689023  | 47274   | 7 | .                                                                                                                                                                                                                                                                                                                                                                                              |
| 2 | 68689023  | 69142467  | 453445  | 4 | .                                                                                                                                                                                                                                                                                                                                                                                              |
| 2 | 69142467  | 69669201  | 526735  | 4 | LOC100138369                                                                                                                                                                                                                                                                                                                                                                                   |
| 2 | 69669201  | 69915322  | 246122  | 7 | .                                                                                                                                                                                                                                                                                                                                                                                              |
| 2 | 69915322  | 70099281  | 183960  | 8 | LOC107131415                                                                                                                                                                                                                                                                                                                                                                                   |
| 2 | 70099281  | 70434413  | 335133  | 9 | CCDC93, DDX18, INSIG2, LOC101904652, LOC107131415, LOC107131416, LOC523484                                                                                                                                                                                                                                                                                                                     |
| 2 | 70434413  | 71966346  | 1531934 | 6 | C1QL2, C2H2orf76, DBI, EN1, LOC100138575, LOC100848049, LOC101907751, LOC104971253, LOC104971255, LOC107131426, LOC616930, MARCO, SCTR, STEAP3, TMEM37                                                                                                                                                                                                                                         |
| 2 | 71966346  | 72274962  | 308617  | 5 | CFAP221, PTPN4, TMEM177, TRNAC-GCA, TRNAE-UUC                                                                                                                                                                                                                                                                                                                                                  |
| 2 | 72274962  | 72659227  | 384266  | 8 | EPB41L5, LOC100139473, LOC101907871, LOC107131428, PTPN4, RALB, TMEM185B, TRNAG-CCC                                                                                                                                                                                                                                                                                                            |
| 2 | 72659227  | 74758659  | 2099433 | 2 | CLASP1, GLI2, INHBB, LOC100139262, LOC100295231, LOC100335292, LOC100848336, LOC104971258, LOC104971259, LOC107131430, LOC781979, NIFK, RALB, TFCP2L1, TRNAE-UUC, TRNAL-CAA, TSN                                                                                                                                                                                                               |
| 2 | 78541873  | 78832515  | 290643  | 2 | .                                                                                                                                                                                                                                                                                                                                                                                              |
| 2 | 82477565  | 82877505  | 399941  | 2 | .                                                                                                                                                                                                                                                                                                                                                                                              |
| 2 | 83494136  | 83500681  | 6546    | 2 | .                                                                                                                                                                                                                                                                                                                                                                                              |
| 2 | 83500681  | 83527672  | 26992   | 3 | .                                                                                                                                                                                                                                                                                                                                                                                              |
| 2 | 83527672  | 84360784  | 833113  | 2 | LOC100138726, LOC107131505                                                                                                                                                                                                                                                                                                                                                                     |
| 2 | 86989029  | 87816781  | 827753  | 3 | BOLL, PLCL1                                                                                                                                                                                                                                                                                                                                                                                    |
| 2 | 87816781  | 88707135  | 890355  | 2 | SATB2                                                                                                                                                                                                                                                                                                                                                                                          |
| 2 | 91915109  | 92392572  | 477464  | 3 | ABI2, CARF, CYP20A1, ICA1L, LOC783376, NBEAL1, RAPH1, WDR12                                                                                                                                                                                                                                                                                                                                    |
| 2 | 92392572  | 92729033  | 336462  | 2 | CD28, RAPH1                                                                                                                                                                                                                                                                                                                                                                                    |
| 2 | 92729033  | 93452842  | 723810  | 3 | CTLA4, ICOS, LOC101903301                                                                                                                                                                                                                                                                                                                                                                      |
| 2 | 99600902  | 99869785  | 268884  | 2 | LOC101906862                                                                                                                                                                                                                                                                                                                                                                                   |
| 2 | 100357429 | 100446226 | 88798   | 5 | ERBB4                                                                                                                                                                                                                                                                                                                                                                                          |
| 2 | 100446226 | 100516918 | 70693   | 5 | ERBB4                                                                                                                                                                                                                                                                                                                                                                                          |
| 2 | 110475223 | 111184193 | 708971  | 2 | EPHA4, LOC104971315                                                                                                                                                                                                                                                                                                                                                                            |
| 2 | 111184193 | 112193029 | 1008837 | 4 | ACSL3, FARSB, LOC104969778, LOC104971316, LOC107131711, LOC538702, MIR2284Y-5, MOGAT1, PAX3, SGPP2                                                                                                                                                                                                                                                                                             |
| 2 | 122369190 | 122572910 | 203721  | 3 | BSDC1, CCDC28B, DCDC2B, EIF3I, FAM167B, FAM229A, HDAC1, IQCC, LCK, LOC789869, MARCKSL1, MTMR9, TMEM234, TSSK3                                                                                                                                                                                                                                                                                  |
| 3 | 115       | 1047887   | 1047773 | 4 | ADCY10, DCAF6, GPR161, LOC100335782, LOC100336903, LOC101904335, LOC101907782, LOC104971400, LOC104971401, LOC104971402, LOC107131930, LOC107131946, LOC787328, LOC787668, LOC790004, MPC2, MPZL1, SFT2D2, TBX19, TIPRL                                                                                                                                                                        |
| 3 | 1047887   | 1862160   | 814274  | 4 | CD247, CREG1, DUSP27, GPA33, LOC101907188, LOC104971405, LOC104971407, LOC104971408, POU2F1, RCSI1, TRNAP-CGG                                                                                                                                                                                                                                                                                  |
| 3 | 1862160   | 2256913   | 394754  | 5 | ILDR2, LOC789898, MAEL, POGK, TADA1                                                                                                                                                                                                                                                                                                                                                            |
| 3 | 2256913   | 2359972   | 103060  | 3 | LOC789898                                                                                                                                                                                                                                                                                                                                                                                      |
| 3 | 2359972   | 2539716   | 179745  | 4 | LOC100140223                                                                                                                                                                                                                                                                                                                                                                                   |
| 3 | 3581552   | 3794829   | 213278  | 2 | LMX1A, RXRG                                                                                                                                                                                                                                                                                                                                                                                    |
| 3 | 8155356   | 8600060   | 444705  | 2 | ADAMTS4, APOA2, ARHGAP30, B4GALT3, CFAP126, DEDD, F11R, FCER1G, ITLN2, KLHDC9, LOC104971424, LOC107132053, LOC107132054, LOC107132055, LOC107132057, MPZ, NDUFS2, NIT1, NR1I3, PCP4L1, PFDN2, PPOX, PVRL4, SDHC, TOMM40L, TRNAD-GUC, TRNAE-CUC, TRNAG-GCC, TRNAG-UCC, TRNAL-CAG, TRNAV-CAC, TSTD1, UFC1, USF1, USP21                                                                           |
| 3 | 8600060   | 8675999   | 75940   | 5 | LOC100137986, LOC788783                                                                                                                                                                                                                                                                                                                                                                        |
| 3 | 8675999   | 8714093   | 38095   | 7 | LOC100336682, LOC786046                                                                                                                                                                                                                                                                                                                                                                        |
| 3 | 8714093   | 8733485   | 19393   | 8 | .                                                                                                                                                                                                                                                                                                                                                                                              |
| 3 | 8733485   | 8810383   | 76899   | 7 | ITLN2, LOC100138220, LOC613299, LOC790169                                                                                                                                                                                                                                                                                                                                                      |
| 3 | 8810383   | 10201579  | 1391197 | 7 | ATP1A2, ATP1A4, CASQ1, CD244, CD48, CD84, CFAP45, COPA, CRP, DCAF8, DUSP23, FCRL6, IGSF8, IGSF9, KCNJ10, KCNJ9, LOC100138271, LOC100139781, LOC101902818, LOC101902959, LOC101903058, LOC101903248, LOC104971425, LOC107132062, LOC613822, LOC787875, LOC788736, LOC790098, LY9, MIR1584, NCSTN, NHLH1, PEA15, PEX19, PIFO, PIGM, SLAMF1, SLAMF6, SLAMF7, SLAMF8, SLAMF9, TAGLN2, VANGL2, VSI8 |
| 3 | 10394411  | 11046761  | 652351  | 2 | ACKR1, AIM2, CADM3, FCER1A, IFI16, LOC100848774, LOC101903951, LOC538552, LOC616952, LOC790111, MPTX, OR10J1, OR10J3, TRNAC-ACA, TRNAR-UCU                                                                                                                                                                                                                                                     |

|   |           |           |         |   |                                                                                                                                                                                                                                                                                                                                                                                                                                                                                                                     |
|---|-----------|-----------|---------|---|---------------------------------------------------------------------------------------------------------------------------------------------------------------------------------------------------------------------------------------------------------------------------------------------------------------------------------------------------------------------------------------------------------------------------------------------------------------------------------------------------------------------|
| 3 | 13129321  | 13410275  | 280955  | 5 | LOC101904923, LOC101905561, LOC107132121, LOC107132273, LOC783963, LOC784007                                                                                                                                                                                                                                                                                                                                                                                                                                        |
| 3 | 13410275  | 13477335  | 67061   | 8 | .                                                                                                                                                                                                                                                                                                                                                                                                                                                                                                                   |
| 3 | 13477335  | 13514898  | 37564   | 8 | .                                                                                                                                                                                                                                                                                                                                                                                                                                                                                                                   |
| 3 | 13514898  | 13704429  | 189532  | 7 | LOC101906176, LOC101906408                                                                                                                                                                                                                                                                                                                                                                                                                                                                                          |
| 3 | 13704429  | 14053110  | 348682  | 4 | ETV3, ETV3L, LOC104971436, LOC107131245, LOC787257, TRNAS-GGA                                                                                                                                                                                                                                                                                                                                                                                                                                                       |
| 3 | 14053110  | 15536710  | 1483601 | 7 | APOA1BP, ARHGEF2, ASH1L, BCAN, BGLAP, CCT3, CRABP2, DAP3, FDPS, GLMP, GON4L, GPATCH4, HAPLN2, HDGF, INSR, IQGAP3, ISG20L2, KIAA0907, LAMTOR2, LMNA, LOC100848553, LOC100848574, LOC100848721, LOC101906206, LOC101906276, LOC104971464, LOC104971465, LOC511220, LOC784055, LOC784466, LOC786728, LRRC71, MEF2D, MEX3A, MIR6534, MRPL24, MSTO1, NES, NTRK1, PAQR6, PEAR1, PMF1, PRCC, RAB25, RHBG, RIT1, RRNAD1, RUSC1, RUSC1-AS1, RXFP4, SEMA4A, SH2D2A, SLC25A44, SMG5, SSR2, SYT11, TMEM79, TSACC, TTC24, UBQLN4 |
| 3 | 21113171  | 21271572  | 158402  | 3 | LOC101907327, MGC134040, TRNAA-CGC, TRNAE-UUC, TRNAG-CCC, TRNAH-GUG, TRNAN-GUU, TRNAQ-CUG, TRNAV-AAC, TRNAV-CAC, TRNAV-UAC                                                                                                                                                                                                                                                                                                                                                                                          |
| 3 | 21271572  | 21367397  | 95826   | 2 | LOC614643, TRNAE-UUC, TRNAG-CCC, TRNAH-GUG, TRNAN-GUU, TRNAQ-CUG, TRNAV-AAC, TRNAV-CAC, TRNAV-UAC                                                                                                                                                                                                                                                                                                                                                                                                                   |
| 3 | 21367397  | 21616259  | 248863  | 3 | LOC107132278, LOC107132279, LOC107132280, TRNAE-UUC, TRNAG-CCC, TRNAG-UCC, TRNAH-GUG, TRNAK-CUU, TRNAN-GUU, TRNAQ-CUG, TRNAV-AAC, TRNAV-CAC, TRNAV-UAC                                                                                                                                                                                                                                                                                                                                                              |
| 3 | 23095483  | 24935203  | 1839721 | 4 | HAO2, HMGC52, HSD3B1, LOC101903694, LOC104971535, LOC107132287, LOC508547, LOC531521, LOC789317, LOC789334, NOTCH2, PHGDH, REG4, SEC22B, TBX15, WARS2, ZNF697                                                                                                                                                                                                                                                                                                                                                       |
| 3 | 24935203  | 24990983  | 55781   | 5 | .                                                                                                                                                                                                                                                                                                                                                                                                                                                                                                                   |
| 3 | 24990983  | 25232148  | 241166  | 6 | LOC100141072, LOC100847756, LOC101903862                                                                                                                                                                                                                                                                                                                                                                                                                                                                            |
| 3 | 25232148  | 25419353  | 187206  | 5 | SPAG17                                                                                                                                                                                                                                                                                                                                                                                                                                                                                                              |
| 3 | 28396266  | 28480007  | 83742   | 3 | .                                                                                                                                                                                                                                                                                                                                                                                                                                                                                                                   |
| 3 | 28480007  | 28534786  | 54780   | 3 | .                                                                                                                                                                                                                                                                                                                                                                                                                                                                                                                   |
| 3 | 28534786  | 28687338  | 152553  | 2 | SYCP1, TSHB, TSPAN2                                                                                                                                                                                                                                                                                                                                                                                                                                                                                                 |
| 3 | 38027343  | 38607628  | 580286  | 2 | LOC104971607, LOC104971608                                                                                                                                                                                                                                                                                                                                                                                                                                                                                          |
| 3 | 47407060  | 47559336  | 152277  | 2 | LOC781902                                                                                                                                                                                                                                                                                                                                                                                                                                                                                                           |
| 3 | 54365913  | 54627815  | 261903  | 3 | GBP2, GBP5, GBP6, LOC107131333, LOC512486, LOC786389                                                                                                                                                                                                                                                                                                                                                                                                                                                                |
| 3 | 54627815  | 54737143  | 109329  | 3 | GBP2, LOC781596, LOC785445                                                                                                                                                                                                                                                                                                                                                                                                                                                                                          |
| 3 | 54737143  | 55017267  | 280125  | 7 | GBP4, GBP6, LOC104968497, LOC781675, LOC781710                                                                                                                                                                                                                                                                                                                                                                                                                                                                      |
| 3 | 55017267  | 55107873  | 90607   | 2 | LOC100336669, LOC510382                                                                                                                                                                                                                                                                                                                                                                                                                                                                                             |
| 3 | 56808531  | 57707009  | 898479  | 5 | HS2ST1, LMO4, LOC101903905, LOC101904240, LOC104969806, LOC104969808, LOC107132316, LOC784606, SEP15, SH3GLB1                                                                                                                                                                                                                                                                                                                                                                                                       |
| 3 | 60024749  | 61299768  | 1275020 | 2 | DNASE2B, GNG5, LOC100139065, LOC100300942, LOC104971676, PRKACB, RPF1, SAMD13, SPATA1, TLL7, UOX                                                                                                                                                                                                                                                                                                                                                                                                                    |
| 3 | 72663221  | 73328200  | 664980  | 2 | LOC785254                                                                                                                                                                                                                                                                                                                                                                                                                                                                                                           |
| 3 | 76688753  | 76949740  | 260988  | 3 | .                                                                                                                                                                                                                                                                                                                                                                                                                                                                                                                   |
| 3 | 76949740  | 77564498  | 614759  | 3 | LOC101907544, LOC107132322, LOC107132325, LOC527397, RPE65                                                                                                                                                                                                                                                                                                                                                                                                                                                          |
| 3 | 77564498  | 78430488  | 865991  | 2 | DIRAS3, GADD45A, GNG12, LOC101907753, LOC104971707, TRNAD-GUC, WLS                                                                                                                                                                                                                                                                                                                                                                                                                                                  |
| 3 | 85943842  | 87060147  | 1116306 | 2 | C3H1orf87, CYP2J2, HOOK1, LOC100139588, LOC104971726, LOC107132327, LOC508252, LOC511936, LOC521656, LOC530875, LOC530929                                                                                                                                                                                                                                                                                                                                                                                           |
| 3 | 94149880  | 97321955  | 3172076 | 4 | AGBL4, BTF3L4, C3H1orf185, CC2D1B, CDKN2C, DMRTA2, ECHDC2, ELAVL4, EPS15, FAF1, FAM159A, GPX7, KTI12, LOC101905708, LOC101906012, LOC101906178, LOC101906381, LOC101906433, LOC104971767, LOC104971768, LOC104971769, LOC107132335, LOC107132348, LOC520518, LOC786738, MIR761, NRDC, ORC1, OSBPL9, PRPF38A, RAB3B, RNF11, SCP2, TTC39A, TXNDC12, ZCCHC11, ZFYVE9, ZYG11A, ZYG11B                                                                                                                                   |
| 3 | 104221017 | 104966185 | 745169  | 2 | C3H1orf50, CCDC30, CLDN19, ERMAP, FOXJ3, LOC101906941, LOC101907688, LOC531467, LOC538699, LOC614376, LOC788834, P3H1, PPCS, PPIH, RIMKLA, SLC2A1, SVBP, YBX1, ZMYND12, ZNF691                                                                                                                                                                                                                                                                                                                                      |
| 3 | 104966185 | 105141892 | 175708  | 2 | FOXJ3, GUCA2A, GUCA2B, HIVEP3                                                                                                                                                                                                                                                                                                                                                                                                                                                                                       |
| 3 | 116852818 | 116963265 | 110448  | 5 | IQCA1, TRNAG-CCC                                                                                                                                                                                                                                                                                                                                                                                                                                                                                                    |
| 4 | 5784478   | 5806768   | 22291   | 3 | ZBPB                                                                                                                                                                                                                                                                                                                                                                                                                                                                                                                |
| 4 | 5806768   | 6429468   | 622701  | 4 | LOC101904266, VWC2, ZBPB                                                                                                                                                                                                                                                                                                                                                                                                                                                                                            |
| 4 | 6429468   | 7234678   | 805211  | 3 | ABCA13, LOC104970217, LOC107132367, LOC781773                                                                                                                                                                                                                                                                                                                                                                                                                                                                       |
| 4 | 7234678   | 8278950   | 1044273 | 5 | C4H7orf57, CDK14, CLDN12, LOC100847712, LOC101910184, LOC107131279, LOC107132370, LOC107132371, LOC107132372, LOC107132373, LOC107132374, LOC107132375, SUN3, UPP1                                                                                                                                                                                                                                                                                                                                                  |
| 4 | 8278950   | 8606252   | 327303  | 2 | CDK14, FZD1, LOC104971924                                                                                                                                                                                                                                                                                                                                                                                                                                                                                           |
| 4 | 14947273  | 15471274  | 524002  | 4 | ASNS, C1GALT1, LOC104971948, LOC107131229, TAC1                                                                                                                                                                                                                                                                                                                                                                                                                                                                     |
| 4 | 29097312  | 29937284  | 839973  | 2 | ABCB5, ITGB8, LOC100138363, LOC104971982, SP8                                                                                                                                                                                                                                                                                                                                                                                                                                                                       |
| 4 | 64264349  | 65194119  | 929771  | 2 | AVL9, BBS9, FKBP9, KBTBD2, LOC104972083, LOC107132408, LOC107132409, LOC782987, LOC785232, LOC786199, LSM5, NT5C3A, PDE1C, RP9                                                                                                                                                                                                                                                                                                                                                                                      |
| 4 | 65791977  | 66781544  | 989568  | 2 | ADCYAP1R1, AQP1, CRHR2, FAM188B, GARS, GGCT, GHRHR, INMT, LOC101904290, LOC104976909, LOC107132410, MIR2419, NOD1, ZNRF2                                                                                                                                                                                                                                                                                                                                                                                            |
| 4 | 68451810  | 68611162  | 159353  | 2 | LOC104972107                                                                                                                                                                                                                                                                                                                                                                                                                                                                                                        |
| 4 | 71826303  | 72190768  | 364466  | 2 | DFNA5, LOC107132418, MPP6                                                                                                                                                                                                                                                                                                                                                                                                                                                                                           |
| 4 | 83520047  | 83522826  | 2780    | 3 | .                                                                                                                                                                                                                                                                                                                                                                                                                                                                                                                   |
| 4 | 83522826  | 83552912  | 30087   | 6 | LOC107132425                                                                                                                                                                                                                                                                                                                                                                                                                                                                                                        |
| 4 | 83552912  | 83687255  | 134344  | 6 | LOC100295719, LOC100335205, LOC101907022, LOC101907237, LOC104976912, LOC104976913, LOC107132422                                                                                                                                                                                                                                                                                                                                                                                                                    |
| 4 | 83687255  | 83852992  | 165738  | 6 | LOC107132423, LSM8, TRGC3, TRGC4                                                                                                                                                                                                                                                                                                                                                                                                                                                                                    |
| 4 | 83852992  | 84031826  | 178835  | 4 | .                                                                                                                                                                                                                                                                                                                                                                                                                                                                                                                   |
| 4 | 84031826  | 84070396  | 38571   | 3 | .                                                                                                                                                                                                                                                                                                                                                                                                                                                                                                                   |
| 4 | 84070396  | 84411475  | 341080  | 6 | LOC107132427                                                                                                                                                                                                                                                                                                                                                                                                                                                                                                        |
| 4 | 84411475  | 84677865  | 266391  | 4 | .                                                                                                                                                                                                                                                                                                                                                                                                                                                                                                                   |
| 4 | 84677865  | 84847336  | 169472  | 2 | .                                                                                                                                                                                                                                                                                                                                                                                                                                                                                                                   |
| 4 | 84847336  | 84858487  | 11152   | 2 | .                                                                                                                                                                                                                                                                                                                                                                                                                                                                                                                   |
| 4 | 84858487  | 85178117  | 319631  | 2 | LOC100139485, LOC512673, LOC786533                                                                                                                                                                                                                                                                                                                                                                                                                                                                                  |

|   |           |           |         |   |                                                                                                                                                                                                                   |
|---|-----------|-----------|---------|---|-------------------------------------------------------------------------------------------------------------------------------------------------------------------------------------------------------------------|
| 4 | 87411115  | 89248836  | 1837722 | 2 | AASS, ASB15, CADPS2, FEZF1, IQUB, LMOD2, LOC100294792, LOC100847585, LOC104972175, LOC104972176, LOC518161, NDUFA5, PTRPZ1, RNF133, RNF148, SLC13A1, TAS2R16, WASL                                                |
| 4 | 89248836  | 89429384  | 180549  | 3 | LOC107132424, LOC107132426, LOC509761, LOC518161, LOC527125, SPAM1                                                                                                                                                |
| 4 | 89429384  | 89643758  | 214375  | 5 | LOC509761, LOC782002, TMEM229A                                                                                                                                                                                    |
| 4 | 90623361  | 90767040  | 143680  | 2 | .                                                                                                                                                                                                                 |
| 4 | 90767040  | 90947479  | 180440  | 2 | LOC782604                                                                                                                                                                                                         |
| 4 | 92806991  | 93209240  | 402250  | 3 | ARF5, FSCN3, GCC1, LOC107132428, PAX4, SND1                                                                                                                                                                       |
| 4 | 95429067  | 96066329  | 637263  | 2 | COPG2, KLF14, LOC100138131, LOC100848808, LOC100848846, LOC101904500, LOC104972200, LOC107131356, LOC107132430, LOC107132431, MIR29A, MIR29B-1, TSGA13                                                            |
| 4 | 96066329  | 96280199  | 213871  | 2 | LOC104972201, MKLN1, TRNAE-UUC                                                                                                                                                                                    |
| 4 | 99548941  | 99964093  | 415153  | 2 | AGBL3, BPGM, CALD1                                                                                                                                                                                                |
| 4 | 101309337 | 101497365 | 188029  | 3 | LOC786173                                                                                                                                                                                                         |
| 4 | 101497365 | 102081800 | 584436  | 2 | CHRM2, MIR490, PTN, TRNAC-GCA                                                                                                                                                                                     |
| 4 | 103222137 | 103301162 | 79026   | 2 | .                                                                                                                                                                                                                 |
| 4 | 105790687 | 106388431 | 597745  | 2 | AGK, KIAA1147, LOC104972259, LOC615237, LOC785954, LOC787707, OR9A4, PRSS37, SSBP1, TAS2R3, TAS2R4, TAS2R5, TMEM178B, TRNAE-CUC, WEE2                                                                             |
| 4 | 107799457 | 108367650 | 568194  | 2 | CASP2, CLCN1, EPHA1, FAM131B, GSKT1, LOC100299556, LOC101905088, LOC101905883, LOC506549, LOC524903, LOC532208, LOC613799, LOC785618, LOC787500, TAS2R40, TAS2R41, TAS2R60, TCAF1, TCAF2, TMEM139, TRNAC-ACA, ZYX |
| 4 | 108636755 | 108782393 | 145639  | 2 | LOC100141283, LOC507423, LOC508101, LOC511400, LOC514662, LOC519916, LOC787786                                                                                                                                    |
| 4 | 109841023 | 109914270 | 73248   | 2 | .                                                                                                                                                                                                                 |
| 4 | 109914270 | 110112590 | 198321  | 2 | .                                                                                                                                                                                                                 |
| 4 | 113569404 | 113782191 | 212788  | 2 | KRBA1, LOC104972285, TRNAC-GCA, ZNF746, ZNF777                                                                                                                                                                    |
| 4 | 115049944 | 116584543 | 1534600 | 5 | ACTR3B, CCT8L2, CRYGN, GALNT11, GALNTL5, KMT2C, LOC100847784, LOC104972293, LOC107132443, LOC504219, LOC789764, NUB1, RHEB, WDR86, XRCC2                                                                          |
| 4 | 116584543 | 116593066 | 8524    | 7 | .                                                                                                                                                                                                                 |
| 4 | 116593066 | 116882680 | 289615  | 7 | LOC509941, TRNAC-GCA, TRNAG-CCC                                                                                                                                                                                   |
| 4 | 116882680 | 116926358 | 43679   | 8 | .                                                                                                                                                                                                                 |
| 4 | 116926358 | 116978379 | 52022   | 7 | .                                                                                                                                                                                                                 |
| 4 | 116978379 | 117034233 | 55855   | 6 | .                                                                                                                                                                                                                 |
| 4 | 117034233 | 117288397 | 254165  | 3 | .                                                                                                                                                                                                                 |
| 5 | 439925    | 564943    | 125019  | 3 | LOC100300697, LOC107132450, LOC782348, MIR2284Y-6                                                                                                                                                                 |
| 5 | 564943    | 586883    | 21941   | 4 | .                                                                                                                                                                                                                 |
| 5 | 586883    | 597090    | 10208   | 5 | .                                                                                                                                                                                                                 |
| 5 | 597090    | 623898    | 26809   | 5 | .                                                                                                                                                                                                                 |
| 5 | 623898    | 634013    | 10116   | 3 | .                                                                                                                                                                                                                 |
| 5 | 634013    | 724185    | 90173   | 2 | .                                                                                                                                                                                                                 |
| 5 | 724185    | 893922    | 169738  | 2 | TRNAC-GCA, TSPAN8                                                                                                                                                                                                 |
| 5 | 893922    | 1028087   | 134166  | 3 | .                                                                                                                                                                                                                 |
| 5 | 1028087   | 1100189   | 72103   | 3 | LGR5                                                                                                                                                                                                              |
| 5 | 1100189   | 1777877   | 677689  | 4 | LGR5, LOC104972316, LOC104972318, LOC107131380, LOC107132451, RAB21, TBC1D15, THAP2, TMEM19, TPH2, ZFC3H1                                                                                                         |
| 5 | 1914509   | 2186305   | 271797  | 2 | TRHDE                                                                                                                                                                                                             |
| 5 | 2186305   | 2203081   | 16777   | 2 | TRHDE                                                                                                                                                                                                             |
| 5 | 2203081   | 2379233   | 176153  | 5 | TRHDE                                                                                                                                                                                                             |
| 5 | 2379233   | 2411220   | 31988   | 5 | .                                                                                                                                                                                                                 |
| 5 | 2411220   | 2423814   | 12595   | 4 | .                                                                                                                                                                                                                 |
| 5 | 2423814   | 2474456   | 50643   | 4 | .                                                                                                                                                                                                                 |
| 5 | 2474456   | 2483082   | 8627    | 3 | .                                                                                                                                                                                                                 |
| 5 | 2632324   | 2646959   | 14636   | 3 | .                                                                                                                                                                                                                 |
| 5 | 2646959   | 2692819   | 45861   | 4 | .                                                                                                                                                                                                                 |
| 5 | 2692819   | 2874861   | 182043  | 3 | .                                                                                                                                                                                                                 |
| 5 | 3620248   | 3856426   | 236179  | 2 | .                                                                                                                                                                                                                 |
| 5 | 3856426   | 3998534   | 142109  | 3 | .                                                                                                                                                                                                                 |
| 5 | 3998534   | 4008099   | 9566    | 2 | .                                                                                                                                                                                                                 |
| 5 | 4008099   | 4114435   | 106337  | 2 | ATXN7L3B                                                                                                                                                                                                          |
| 5 | 4114435   | 4165563   | 51129   | 4 | LOC523590                                                                                                                                                                                                         |
| 5 | 4165563   | 4239082   | 73520   | 5 | .                                                                                                                                                                                                                 |
| 5 | 4239082   | 4251199   | 12118   | 5 | .                                                                                                                                                                                                                 |
| 5 | 4251199   | 4310635   | 59437   | 4 | .                                                                                                                                                                                                                 |
| 5 | 4310635   | 4399763   | 89129   | 6 | .                                                                                                                                                                                                                 |
| 5 | 4399763   | 4527920   | 128158  | 3 | KCNC2, TRNAY-GUA                                                                                                                                                                                                  |
| 5 | 4527920   | 4611238   | 83319   | 3 | KCNC2                                                                                                                                                                                                             |
| 5 | 4611238   | 4701459   | 90222   | 7 | KCNC2                                                                                                                                                                                                             |
| 5 | 4701459   | 4805869   | 104411  | 7 | CAPS2                                                                                                                                                                                                             |
| 5 | 4805869   | 4825374   | 19506   | 7 | CAPS2, GLIPR1L1                                                                                                                                                                                                   |
| 5 | 4825374   | 4859596   | 34223   | 7 | GLIPR1L1                                                                                                                                                                                                          |
| 5 | 4859596   | 4891877   | 32282   | 6 | GLIPR1L1, GLIPR1L2                                                                                                                                                                                                |
| 5 | 4891877   | 4939903   | 48027   | 5 | GLIPR1L2                                                                                                                                                                                                          |
| 5 | 4939903   | 5137431   | 197529  | 4 | GLIPR1, KRR1, LOC107132452                                                                                                                                                                                        |
| 5 | 5137431   | 5229672   | 92242   | 6 | LOC104972322                                                                                                                                                                                                      |
| 5 | 5229672   | 5292853   | 63182   | 7 | .                                                                                                                                                                                                                 |
| 5 | 5292853   | 5411798   | 118946  | 4 | LOC785400                                                                                                                                                                                                         |
| 5 | 5411798   | 5630469   | 218672  | 2 | NAP1L1, PHLDA1                                                                                                                                                                                                    |
| 5 | 6311101   | 6330739   | 19639   | 2 | LOC104972329                                                                                                                                                                                                      |
| 5 | 6330739   | 6420487   | 89749   | 2 | LOC104972328, LOC104972329                                                                                                                                                                                        |
| 5 | 6693208   | 6904829   | 211622  | 2 | .                                                                                                                                                                                                                 |
| 5 | 6904829   | 7138623   | 233795  | 2 | .                                                                                                                                                                                                                 |
| 5 | 7196789   | 7242823   | 46035   | 2 | .                                                                                                                                                                                                                 |
| 5 | 7270196   | 7319421   | 49226   | 2 | NAV3                                                                                                                                                                                                              |
| 5 | 7319421   | 7512172   | 192752  | 3 | NAV3                                                                                                                                                                                                              |
| 5 | 7512172   | 7711444   | 199273  | 3 | NAV3                                                                                                                                                                                                              |



|   |          |          |        |    |                                                                                                                                                                                     |
|---|----------|----------|--------|----|-------------------------------------------------------------------------------------------------------------------------------------------------------------------------------------|
| 5 | 7711444  | 7838466  | 127023 | 2  | LOC104972331                                                                                                                                                                        |
| 5 | 7838466  | 7985794  | 147329 | 2  | .                                                                                                                                                                                   |
| 5 | 8012345  | 8017098  | 4754   | 2  | .                                                                                                                                                                                   |
| 5 | 8017098  | 8088122  | 71025  | 3  | .                                                                                                                                                                                   |
| 5 | 8088122  | 8349091  | 260970 | 9  | LOC104972332                                                                                                                                                                        |
| 5 | 8349091  | 8545718  | 196628 | 14 | LOC101907549, SYT1                                                                                                                                                                  |
| 5 | 8545718  | 8736391  | 190674 | 16 | SYT1                                                                                                                                                                                |
| 5 | 8736391  | 8826461  | 90071  | 22 | LOC104972336, SYT1                                                                                                                                                                  |
| 5 | 8826461  | 8894814  | 68354  | 17 | LOC104972336, LOC107131353, SYT1                                                                                                                                                    |
| 5 | 8894814  | 9100879  | 206066 | 12 | LOC104972334, LOC104972335, SYT1                                                                                                                                                    |
| 5 | 9100879  | 9290345  | 189467 | 12 | PAWR                                                                                                                                                                                |
| 5 | 9290345  | 9444803  | 154459 | 9  | LOC104972337, PPP1R12A                                                                                                                                                              |
| 5 | 9444803  | 9658212  | 213410 | 8  | PPP1R12A                                                                                                                                                                            |
| 5 | 9658212  | 9690965  | 32754  | 6  | .                                                                                                                                                                                   |
| 5 | 9690965  | 9982724  | 291760 | 2  | OTOGL                                                                                                                                                                               |
| 5 | 10010817 | 10132980 | 122164 | 2  | PTPRQ                                                                                                                                                                               |
| 5 | 10132980 | 10296641 | 163662 | 3  | PTPRQ                                                                                                                                                                               |
| 5 | 10296641 | 10409532 | 112892 | 4  | MYF5, MYF6, PTPRQ                                                                                                                                                                   |
| 5 | 10409532 | 10551759 | 142228 | 3  | LIN7A                                                                                                                                                                               |
| 5 | 10551759 | 10729620 | 177862 | 4  | LIN7A                                                                                                                                                                               |
| 5 | 13831494 | 13886098 | 54605  | 2  | .                                                                                                                                                                                   |
| 5 | 13886098 | 13947817 | 61720  | 2  | .                                                                                                                                                                                   |
| 5 | 13947817 | 14000549 | 52733  | 2  | .                                                                                                                                                                                   |
| 5 | 14000549 | 14177952 | 177404 | 2  | .                                                                                                                                                                                   |
| 5 | 15155020 | 15209144 | 54125  | 2  | .                                                                                                                                                                                   |
| 5 | 15209144 | 15522159 | 313016 | 3  | .                                                                                                                                                                                   |
| 5 | 15522159 | 15583971 | 61813  | 4  | RASSF9                                                                                                                                                                              |
| 5 | 15583971 | 15665847 | 81877  | 5  | LOC107132461, NTS, RASSF9                                                                                                                                                           |
| 5 | 15805773 | 15830618 | 24846  | 5  | MGAT4C                                                                                                                                                                              |
| 5 | 15830618 | 15916364 | 85747  | 5  | MGAT4C                                                                                                                                                                              |
| 5 | 15916364 | 15941849 | 25486  | 4  | .                                                                                                                                                                                   |
| 5 | 16279758 | 16528289 | 248532 | 5  | .                                                                                                                                                                                   |
| 5 | 16528289 | 16704527 | 176239 | 8  | .                                                                                                                                                                                   |
| 5 | 16704527 | 16801918 | 97392  | 7  | .                                                                                                                                                                                   |
| 5 | 16801918 | 16804356 | 2439   | 6  | .                                                                                                                                                                                   |
| 5 | 16804356 | 16870500 | 66145  | 7  | LOC781871                                                                                                                                                                           |
| 5 | 16870500 | 16905216 | 34717  | 6  | .                                                                                                                                                                                   |
| 5 | 16905216 | 16930517 | 25302  | 9  | .                                                                                                                                                                                   |
| 5 | 16930517 | 16952638 | 22122  | 8  | .                                                                                                                                                                                   |
| 5 | 16952638 | 17002132 | 49495  | 7  | .                                                                                                                                                                                   |
| 5 | 17002132 | 17065149 | 63018  | 7  | .                                                                                                                                                                                   |
| 5 | 17065149 | 17128261 | 63113  | 3  | .                                                                                                                                                                                   |
| 5 | 17618052 | 17808403 | 190352 | 2  | .                                                                                                                                                                                   |
| 5 | 17808403 | 17846180 | 37778  | 2  | .                                                                                                                                                                                   |
| 5 | 17846180 | 18173970 | 327791 | 2  | C5H12orf29, C5H12orf50, CEP290, TMTC3                                                                                                                                               |
| 5 | 18300447 | 18500724 | 200278 | 3  | KITLG                                                                                                                                                                               |
| 5 | 18500724 | 18653953 | 153230 | 3  | LOC107132455, TRNAG-CCC                                                                                                                                                             |
| 5 | 18653953 | 18666885 | 12933  | 4  | .                                                                                                                                                                                   |
| 5 | 18666885 | 18783346 | 116462 | 3  | LOC104972350                                                                                                                                                                        |
| 5 | 18783346 | 18927558 | 144213 | 3  | .                                                                                                                                                                                   |
| 5 | 18927558 | 19018920 | 91363  | 2  | LOC100138578, LOC104972370                                                                                                                                                          |
| 5 | 19123771 | 19571124 | 447354 | 2  | DUSP6, GALNT4, LOC101906850, LOC101906971, LOC104972351, LOC107131351, LOC107132457, LOC781851, POC1B, TRNAK-UUU                                                                    |
| 5 | 19571124 | 19717683 | 146560 | 3  | ATP2B1                                                                                                                                                                              |
| 5 | 19717683 | 19784656 | 66974  | 2  | .                                                                                                                                                                                   |
| 5 | 19784656 | 19882814 | 98159  | 3  | .                                                                                                                                                                                   |
| 5 | 19882814 | 20099437 | 216624 | 2  | .                                                                                                                                                                                   |
| 5 | 20099437 | 20213170 | 113734 | 3  | .                                                                                                                                                                                   |
| 5 | 20213170 | 20343409 | 130240 | 2  | .                                                                                                                                                                                   |
| 5 | 20571197 | 20611925 | 40729  | 2  | LOC100848024                                                                                                                                                                        |
| 5 | 20611925 | 20768416 | 156492 | 2  | .                                                                                                                                                                                   |
| 5 | 20768416 | 20890950 | 122535 | 6  | .                                                                                                                                                                                   |
| 5 | 20890950 | 21037819 | 146870 | 5  | CCER1, EPHYC                                                                                                                                                                        |
| 5 | 21037819 | 21196770 | 158952 | 2  | DCN, KERA, LUM, TRNAC-ACA                                                                                                                                                           |
| 5 | 22021953 | 22294610 | 272658 | 3  | BTG1, LOC104972363, LOC107132458, LOC107132459                                                                                                                                      |
| 5 | 22294610 | 22463653 | 169044 | 3  | LOC107132463                                                                                                                                                                        |
| 5 | 22463653 | 22642083 | 178431 | 2  | LOC107132460, LOC784883                                                                                                                                                             |
| 5 | 22642083 | 22674044 | 31962  | 2  | .                                                                                                                                                                                   |
| 5 | 22674044 | 22889738 | 215695 | 2  | EEA1, LOC104972371, LOC107132468, LOC519417                                                                                                                                         |
| 5 | 22889738 | 23348216 | 458479 | 2  | EEA1, LOC107132464, LOC107132465, LOC107132466, LOC107132467                                                                                                                        |
| 5 | 23348216 | 23631496 | 283281 | 6  | LOC101905513, LOC107132465, MRPL42, NUDT4, SOCS2, UBE2N                                                                                                                             |
| 5 | 23631496 | 24040418 | 408923 | 2  | CRADD, LOC101905585, LOC104972373, LOC104972374, LOC104972375                                                                                                                       |
| 5 | 25608175 | 26157128 | 548954 | 2  | CBX5, COPZ1, GLYCAM1, GPR84, GTSF1, HNRNPA1, ITGA5, LOC100847613, LOC101906546, LOC101907193, LOC534520, MIR148B, NCKAP1L, NFE2, PDE1B, PPP1R1A, SMUG1, ZNF385A                     |
| 5 | 26157128 | 26341839 | 184712 | 3  | HOXC10, HOXC11, HOXC12, HOXC13, HOXC4, HOXC5, HOXC6, HOXC8, HOXC9, LOC100847613, LOC101906996, LOC101907194, LOC101907241, LOC107132469, LOC107132470, LOC785891, MIR196A-2, MIR615 |
| 5 | 29840141 | 29914762 | 74622  | 2  | LIMA1                                                                                                                                                                               |
| 5 | 31082135 | 31405283 | 323149 | 2  | ADCY6, ARF3, CACNB3, CCDC65, CCNT1, DDX23, FKBP11, KANSL2, LOC100335701, LOC107132475, LOC783895, MIR1291, RND1                                                                     |
| 5 | 31405283 | 31435844 | 30562  | 5  | LALBA, LOC104972406                                                                                                                                                                 |
| 5 | 31435844 | 31465094 | 29251  | 4  | LOC617415                                                                                                                                                                           |
| 5 | 31465094 | 31484287 | 19194  | 4  | LOC526630                                                                                                                                                                           |
| 5 | 31484287 | 31528809 | 44523  | 3  | LOC614370                                                                                                                                                                           |
| 5 | 31528809 | 31582471 | 53663  | 2  | LOC515887                                                                                                                                                                           |
| 5 | 31742466 | 31812280 | 69815  | 2  | C5H12orf54, LOC781840                                                                                                                                                               |

|   |          |          |        |    |                                                                                                                                            |
|---|----------|----------|--------|----|--------------------------------------------------------------------------------------------------------------------------------------------|
| 5 | 31812280 | 31904284 | 92005  | 2  | LOC509817                                                                                                                                  |
| 5 | 31904284 | 32113679 | 209396 | 2  | LOC100300010, LOC518129, LOC523258, LOC617380, LOC617388, LOC781968                                                                        |
| 5 | 32113679 | 32186128 | 72450  | 3  | LOC100848234, ZNF641                                                                                                                       |
| 5 | 32186128 | 32199156 | 13029  | 3  | H1FNT, LOC784038                                                                                                                           |
| 5 | 32199156 | 32226441 | 27286  | 4  | .                                                                                                                                          |
| 5 | 32226441 | 32522177 | 295737 | 4  | ASB8, CCDC184, COL2A1, LOC100139168, LOC101902265, LOC101905376, LOC104972407, LOC513452, LOC619137, OR10AD1, PFKM, SENP1 COL2A1, TMEM106C |
| 5 | 32522177 | 32599220 | 77044  | 2  | .                                                                                                                                          |
| 5 | 33811792 | 33938204 | 126413 | 3  | .                                                                                                                                          |
| 5 | 33938204 | 34169187 | 230984 | 2  | LOC107132478, SLC38A2                                                                                                                      |
| 5 | 34169187 | 34239479 | 70293  | 2  | SLC38A1                                                                                                                                    |
| 5 | 34239479 | 34306959 | 67481  | 2  | SLC38A1                                                                                                                                    |
| 5 | 34462922 | 34562320 | 99399  | 3  | ARID2, SCAF11                                                                                                                              |
| 5 | 34562320 | 34610038 | 47719  | 4  | ARID2, TRNAC-ACA                                                                                                                           |
| 5 | 34610038 | 34617829 | 7792   | 4  | ARID2                                                                                                                                      |
| 5 | 34617829 | 34769744 | 151916 | 4  | ARID2                                                                                                                                      |
| 5 | 34769744 | 34888938 | 119195 | 5  | ARID2                                                                                                                                      |
| 5 | 34888938 | 35227840 | 338903 | 3  | ANO6                                                                                                                                       |
| 5 | 35978920 | 36197204 | 218285 | 2  | LOC107132476, NELL2                                                                                                                        |
| 5 | 36197204 | 36232019 | 34816  | 2  | LOC107132476                                                                                                                               |
| 5 | 36232019 | 36316484 | 84466  | 2  | TMEM117                                                                                                                                    |
| 5 | 36316484 | 36337947 | 21464  | 2  | TMEM117                                                                                                                                    |
| 5 | 36337947 | 36406600 | 68654  | 3  | TMEM117                                                                                                                                    |
| 5 | 36406600 | 36443954 | 37355  | 3  | .                                                                                                                                          |
| 5 | 36443954 | 36542742 | 98789  | 2  | LOC107131297                                                                                                                               |
| 5 | 37025559 | 37236600 | 211042 | 4  | ADAMTS20                                                                                                                                   |
| 5 | 37236600 | 37255967 | 19368  | 5  | ADAMTS20                                                                                                                                   |
| 5 | 37255967 | 37392896 | 136930 | 3  | ADAMTS20                                                                                                                                   |
| 5 | 37392896 | 37489647 | 96752  | 3  | ADAMTS20, LOC101904720, LOC534627                                                                                                          |
| 5 | 37489647 | 37538959 | 49313  | 3  | LOC786089                                                                                                                                  |
| 5 | 37538959 | 37777002 | 238044 | 3  | LOC786089                                                                                                                                  |
| 5 | 37777002 | 37945765 | 168764 | 4  | TRNAS-GGA                                                                                                                                  |
| 5 | 37945765 | 38114469 | 168705 | 3  | .                                                                                                                                          |
| 5 | 38314607 | 38614126 | 299520 | 3  | LOC100336326, PPHLN1, PRICKLE1                                                                                                             |
| 5 | 38614126 | 38864463 | 250338 | 4  | GXYLT1, PPHLN1, YAF2, ZCRB1                                                                                                                |
| 5 | 39528650 | 39659992 | 131343 | 2  | LOC107131267                                                                                                                               |
| 5 | 39659992 | 39731473 | 71482  | 2  | LOC101905399, LOC107131267, TRNAQ-CUG                                                                                                      |
| 5 | 39731473 | 39819256 | 87784  | 2  | LOC107131267                                                                                                                               |
| 5 | 39819256 | 40012213 | 192958 | 2  | LOC100139418, LOC107131267                                                                                                                 |
| 5 | 40012213 | 40027223 | 15011  | 2  | .                                                                                                                                          |
| 5 | 40027223 | 40333876 | 306654 | 2  | CNTN1                                                                                                                                      |
| 5 | 40523390 | 40545395 | 22006  | 7  | .                                                                                                                                          |
| 5 | 40545395 | 40593945 | 48551  | 6  | .                                                                                                                                          |
| 5 | 40593945 | 40673770 | 79826  | 7  | MUC19                                                                                                                                      |
| 5 | 40673770 | 40694473 | 20704  | 7  | MUC19                                                                                                                                      |
| 5 | 40694473 | 40729225 | 34753  | 5  | MUC19                                                                                                                                      |
| 5 | 40729225 | 40830261 | 101037 | 2  | LOC534391, LRRK2, MUC19                                                                                                                    |
| 5 | 40918915 | 41278624 | 359710 | 3  | LRRK2, SLC2A13                                                                                                                             |
| 5 | 41278624 | 41384642 | 106019 | 5  | SLC2A13                                                                                                                                    |
| 5 | 41384642 | 41611222 | 226581 | 2  | SLC2A13                                                                                                                                    |
| 5 | 41611222 | 41673692 | 62471  | 2  | SLC2A13                                                                                                                                    |
| 5 | 41673692 | 41851800 | 178109 | 3  | ABCD2, C5H12orf40                                                                                                                          |
| 5 | 41851800 | 42020746 | 168947 | 3  | LOC785955                                                                                                                                  |
| 5 | 42020746 | 42032185 | 11440  | 3  | LOC100847470                                                                                                                               |
| 5 | 42032185 | 42256395 | 224211 | 2  | KIF21A, MIR2428                                                                                                                            |
| 5 | 42457477 | 42571775 | 114299 | 5  | CPNE8, LOC101907676                                                                                                                        |
| 5 | 42571775 | 42767965 | 196191 | 11 | CPNE8                                                                                                                                      |
| 5 | 42767965 | 42792545 | 24581  | 13 | CPNE8                                                                                                                                      |
| 5 | 42792545 | 42820516 | 27972  | 12 | CPNE8                                                                                                                                      |
| 5 | 42820516 | 42861062 | 40547  | 12 | .                                                                                                                                          |
| 5 | 42861062 | 42997132 | 136071 | 8  | PTPRR                                                                                                                                      |
| 5 | 42997132 | 43013887 | 16756  | 10 | PTPRR                                                                                                                                      |
| 5 | 43013887 | 43051636 | 37750  | 10 | PTPRR                                                                                                                                      |
| 5 | 43051636 | 43066541 | 14906  | 10 | PTPRR                                                                                                                                      |
| 5 | 43066541 | 43305508 | 238968 | 7  | PTPRB, PTPRR                                                                                                                               |
| 5 | 43305508 | 43406678 | 101171 | 6  | KCNMB4, MIR2284Z-5, PTPRB, TRNAC-GCA                                                                                                       |
| 5 | 43406678 | 43453830 | 47153  | 9  | KCNMB4, LOC100138492                                                                                                                       |
| 5 | 43453830 | 43612144 | 158315 | 10 | CNOT2, KCNMB4, LOC107132479                                                                                                                |
| 5 | 43612144 | 43718585 | 106442 | 8  | LOC104972423, LOC107131684                                                                                                                 |
| 5 | 43718585 | 43825499 | 106915 | 6  | .                                                                                                                                          |
| 5 | 43825499 | 43971017 | 145519 | 3  | MYRFL                                                                                                                                      |
| 5 | 43971017 | 44051445 | 80429  | 3  | MYRFL, RAB3IP                                                                                                                              |
| 5 | 44051445 | 44165151 | 113707 | 4  | BEST3, LOC107132482, RAB3IP                                                                                                                |
| 5 | 44165151 | 44426004 | 260854 | 5  | BEST3, CCT2, FRP2, LOC100138933, LOC107132483, LRRC10, MIR2427                                                                             |
| 5 | 44840196 | 44884875 | 44680  | 4  | LYZ                                                                                                                                        |
| 5 | 44884875 | 44977579 | 92705  | 4  | CPSF6                                                                                                                                      |
| 5 | 44977579 | 45069213 | 91635  | 3  | LOC107132485                                                                                                                               |
| 5 | 45069213 | 45274321 | 205109 | 3  | CPM, LOC104969823                                                                                                                          |
| 5 | 45274321 | 45577631 | 303311 | 3  | CPM, LOC104972426, LOC104972427, LOC107132480, MDM2, NUP107, RAP1B, SLC35E3                                                                |
| 5 | 45594832 | 45608608 | 13777  | 2  | .                                                                                                                                          |
| 5 | 45608608 | 45718274 | 109667 | 3  | LOC104972428                                                                                                                               |
| 5 | 46328167 | 46361300 | 33134  | 2  | .                                                                                                                                          |
| 5 | 46361300 | 46506680 | 145381 | 3  | DYRK2                                                                                                                                      |
| 5 | 46702779 | 46763955 | 61177  | 2  | .                                                                                                                                          |
| 5 | 46784332 | 47368052 | 583721 | 2  | CAND1, LOC100337478, LOC100848339, LOC107132481, TRNAE-UUC                                                                                 |
| 5 | 47368052 | 47678820 | 310769 | 2  | LOC100337478, TRNAC-GCA                                                                                                                    |

|   |           |           |         |   |                                                                                                                                                                                                                              |
|---|-----------|-----------|---------|---|------------------------------------------------------------------------------------------------------------------------------------------------------------------------------------------------------------------------------|
| 5 | 47782922  | 48188745  | 405824  | 3 | HELX, IRAK3, LLPH, LOC107132486, LOC525592, LOC783726, TMBIM4, TRNAK-CUU                                                                                                                                                     |
| 5 | 48188745  | 48243170  | 54426   | 2 | HMG2, LOC100848387                                                                                                                                                                                                           |
| 5 | 48508578  | 48647839  | 139262  | 2 | LOC101905641, LOC101905683                                                                                                                                                                                                   |
| 5 | 48647839  | 48673623  | 25785   | 2 | .                                                                                                                                                                                                                            |
| 5 | 48673623  | 48916848  | 243226  | 9 | MSRB3                                                                                                                                                                                                                        |
| 5 | 48916848  | 49146564  | 229717  | 8 | LEMD3, MIR2429, WIF1                                                                                                                                                                                                         |
| 5 | 49146564  | 49311967  | 165404  | 8 | LOC107132487, WIF1                                                                                                                                                                                                           |
| 5 | 49311967  | 49517029  | 205063  | 5 | GNS, LOC101906182, TBC1D30                                                                                                                                                                                                   |
| 5 | 49517029  | 50067479  | 550451  | 2 | C5H12orf56, C5H12orf66, LOC101906522, LOC107132488, MIR2285F-1, RASSF3, SRGAP1, TBK1, TRNAF-AAA, XPOT                                                                                                                        |
| 5 | 50102686  | 50162577  | 59892   | 6 | SRGAP1                                                                                                                                                                                                                       |
| 5 | 50162577  | 50314159  | 151583  | 5 | LOC107132489, SRGAP1                                                                                                                                                                                                         |
| 5 | 50314159  | 50434366  | 120208  | 2 | TMEM5                                                                                                                                                                                                                        |
| 5 | 50561941  | 50635650  | 73710   | 3 | .                                                                                                                                                                                                                            |
| 5 | 50635650  | 50697994  | 62345   | 3 | .                                                                                                                                                                                                                            |
| 5 | 50697994  | 50725587  | 27594   | 3 | .                                                                                                                                                                                                                            |
| 5 | 50725587  | 50778363  | 52777   | 3 | AVPR1A                                                                                                                                                                                                                       |
| 5 | 50778363  | 50875417  | 97055   | 4 | .                                                                                                                                                                                                                            |
| 5 | 50875417  | 50949612  | 74196   | 5 | LOC100140195                                                                                                                                                                                                                 |
| 5 | 50949612  | 50957299  | 7688    | 6 | .                                                                                                                                                                                                                            |
| 5 | 50957299  | 51252430  | 295132  | 5 | PPM1H                                                                                                                                                                                                                        |
| 5 | 51252430  | 51519839  | 267410  | 6 | LOC104972443, LOC784406, MIRLET7I, MON2, PPM1H                                                                                                                                                                               |
| 5 | 51519839  | 51527022  | 7184    | 7 | .                                                                                                                                                                                                                            |
| 5 | 51527022  | 51729680  | 202659  | 8 | USP15                                                                                                                                                                                                                        |
| 5 | 51729680  | 51965933  | 236254  | 2 | FAM19A2                                                                                                                                                                                                                      |
| 5 | 51965933  | 52060683  | 94751   | 3 | FAM19A2                                                                                                                                                                                                                      |
| 5 | 52060683  | 52329927  | 269245  | 2 | FAM19A2, LOC101903699, LOC104972445                                                                                                                                                                                          |
| 5 | 52329927  | 52573428  | 243502  | 2 | FAM19A2                                                                                                                                                                                                                      |
| 5 | 52573428  | 52584781  | 11354   | 3 | .                                                                                                                                                                                                                            |
| 5 | 52584781  | 52750281  | 165501  | 4 | .                                                                                                                                                                                                                            |
| 5 | 52750281  | 52856899  | 106619  | 6 | .                                                                                                                                                                                                                            |
| 5 | 52856899  | 53022987  | 166089  | 8 | LOC617908                                                                                                                                                                                                                    |
| 5 | 53022987  | 53104152  | 81166   | 9 | LOC617908                                                                                                                                                                                                                    |
| 5 | 53104152  | 53114278  | 10127   | 9 | .                                                                                                                                                                                                                            |
| 5 | 53114278  | 53226677  | 112400  | 8 | .                                                                                                                                                                                                                            |
| 5 | 53226677  | 53238343  | 11667   | 9 | .                                                                                                                                                                                                                            |
| 5 | 53238343  | 53329666  | 91324   | 9 | .                                                                                                                                                                                                                            |
| 5 | 53329666  | 53410321  | 80656   | 8 | LOC788961                                                                                                                                                                                                                    |
| 5 | 53410321  | 53610267  | 199947  | 8 | .                                                                                                                                                                                                                            |
| 5 | 53610267  | 53652100  | 41834   | 8 | .                                                                                                                                                                                                                            |
| 5 | 53652100  | 53696353  | 44254   | 7 | .                                                                                                                                                                                                                            |
| 5 | 53696353  | 53835646  | 139294  | 7 | .                                                                                                                                                                                                                            |
| 5 | 53835646  | 53953297  | 117652  | 6 | .                                                                                                                                                                                                                            |
| 5 | 53953297  | 54236924  | 283628  | 6 | SLC16A7                                                                                                                                                                                                                      |
| 5 | 54236924  | 54261341  | 24418   | 6 | SLC16A7                                                                                                                                                                                                                      |
| 5 | 54261341  | 54638166  | 376826  | 6 | LOC101907520, LOC512953, SLC16A7                                                                                                                                                                                             |
| 5 | 54638166  | 54664486  | 26321   | 5 | .                                                                                                                                                                                                                            |
| 5 | 54664486  | 54717844  | 53359   | 4 | .                                                                                                                                                                                                                            |
| 5 | 54968693  | 55152212  | 183520  | 3 | LRIG3                                                                                                                                                                                                                        |
| 5 | 55152212  | 55179298  | 27087   | 3 | .                                                                                                                                                                                                                            |
| 5 | 69423137  | 69605239  | 182103  | 2 | .                                                                                                                                                                                                                            |
| 5 | 78796860  | 79351588  | 554729  | 6 | AMN1, DENND5B, ETFBKMT, FAM60A, LOC101902656, LOC107132510, LOC107132512                                                                                                                                                     |
| 5 | 79351588  | 79411652  | 60065   | 5 | LOC101903536, LOC107132512                                                                                                                                                                                                   |
| 5 | 87693343  | 88486577  | 793235  | 2 | C2CD5, ETNK1, LOC100139600, LOC100335949, TRNAG-CCC, TRNAK-UUU                                                                                                                                                               |
| 5 | 98719095  | 99679305  | 960211  | 3 | BOTA-T2R10B, ETV6, LOC100138383, LOC100140395, LOC100141277, LOC101903336, LOC104972542, LOC104976968, LOC616478, LOC782957, SMIM10L1, STYK1, T2R10C, T2R12, T2R65A, TAS2R10, TAS2R42, TAS2R46, TAS2R7, TAS2R8, TAS2R9, YBX3 |
| 5 | 99679305  | 99886865  | 207561  | 3 | KLRA1, LOC100140174, LOC101903003, LOC513869, LOC788694, MAGOHB, STYK1                                                                                                                                                       |
| 5 | 102930963 | 103110464 | 179502  | 3 | LOC100335428, WC1-12                                                                                                                                                                                                         |
| 5 | 121453798 | 121497102 | 43305   | 2 | MLC1, MOV10L1                                                                                                                                                                                                                |
| 6 | 24986     | 307217    | 282232  | 3 | APELA, LOC100299844, LOC100299892, LOC101905490                                                                                                                                                                              |
| 6 | 307217    | 446776    | 139560  | 3 | LOC513842                                                                                                                                                                                                                    |
| 6 | 446776    | 510323    | 63548   | 2 | .                                                                                                                                                                                                                            |
| 6 | 1342122   | 1528525   | 186404  | 2 | LOC101907838, LOC107132536                                                                                                                                                                                                   |
| 6 | 2079968   | 2358380   | 278413  | 2 | LOC107132537, MARCH1, TKTL2, TMA16                                                                                                                                                                                           |
| 6 | 2358380   | 2683253   | 324874  | 2 | LOC107132538, NAF1, NPY1R, NPY5R                                                                                                                                                                                             |
| 6 | 4377275   | 4830964   | 453690  | 2 | NDNF, PRDM5                                                                                                                                                                                                                  |
| 6 | 4830964   | 5004058   | 173095  | 3 | .                                                                                                                                                                                                                            |
| 6 | 17781495  | 18099168  | 317674  | 4 | COL25A1, ETNPPL, OSTC, RPL34                                                                                                                                                                                                 |
| 6 | 18099168  | 18413419  | 314252  | 4 | LOC104972676, LOC104972677, LOC104972678, LOC104972680                                                                                                                                                                       |
| 6 | 18413419  | 18886359  | 472941  | 2 | CYP2U1, HADH, LEF1, LOC107132549, SGMS2, TRNAC-GCA, TRNAG-CCC                                                                                                                                                                |
| 6 | 18886359  | 19199129  | 312771  | 3 | LOC104972682, PAPSS1                                                                                                                                                                                                         |
| 6 | 19199129  | 19323028  | 123900  | 3 | LOC104972682                                                                                                                                                                                                                 |
| 6 | 19323028  | 19347807  | 24780   | 4 | LOC104972682                                                                                                                                                                                                                 |
| 6 | 19347807  | 19670505  | 322699  | 5 | DKK2, LOC104972682                                                                                                                                                                                                           |
| 6 | 19670505  | 19813349  | 142845  | 7 | DKK2                                                                                                                                                                                                                         |
| 6 | 19813349  | 19996558  | 183210  | 4 | TRNAC-GCA                                                                                                                                                                                                                    |
| 6 | 19996558  | 20484214  | 487657  | 4 | AIMP1, GIMD1, LOC104972685, TBCK                                                                                                                                                                                             |
| 6 | 24646787  | 24849048  | 202262  | 6 | TRNAW-CCA                                                                                                                                                                                                                    |
| 6 | 24849048  | 26040868  | 1191821 | 3 | EMCN, LOC104972699, PPP3CA                                                                                                                                                                                                   |
| 6 | 28172336  | 28312561  | 140226  | 2 | LOC100301359, LOC104972708                                                                                                                                                                                                   |
| 6 | 28312561  | 28338758  | 26198   | 3 | LOC104972708                                                                                                                                                                                                                 |
| 6 | 28338758  | 28372077  | 33320   | 3 | LOC104972708                                                                                                                                                                                                                 |
| 6 | 28372077  | 28473009  | 100933  | 3 | LOC104972708                                                                                                                                                                                                                 |

|   |          |          |         |    |                                                                                                                                                                                 |
|---|----------|----------|---------|----|---------------------------------------------------------------------------------------------------------------------------------------------------------------------------------|
| 6 | 28473009 | 29194773 | 721765  | 2  | LOC104972708, LOC104972710, LOC104972713, LOC782904, LOC782977, TRNAC-GCA                                                                                                       |
| 6 | 29981797 | 30300325 | 318529  | 3  | LOC104972712, PDHA2                                                                                                                                                             |
| 6 | 30300325 | 31905934 | 1605610 | 3  | BMP1R1B, HPGDS, PDLIM5, TRNAK-CUU, UNC5C                                                                                                                                        |
| 6 | 31905934 | 32352232 | 446299  | 2  | ATOH1, HPGDS, LOC100140135, SMARCAD1                                                                                                                                            |
| 6 | 32352232 | 32378781 | 26550   | 3  | .                                                                                                                                                                               |
| 6 | 32378781 | 32830464 | 451684  | 3  | LOC107132560, LOC536367, TRNAE-UUC                                                                                                                                              |
| 6 | 33342585 | 33549452 | 206868  | 3  | LOC783261                                                                                                                                                                       |
| 6 | 35166605 | 35408630 | 242026  | 2  | CCSER1, LOC509118                                                                                                                                                               |
| 6 | 35408630 | 35556058 | 147429  | 7  | CCSER1                                                                                                                                                                          |
| 6 | 35556058 | 35697025 | 140968  | 7  | CCSER1                                                                                                                                                                          |
| 6 | 35697025 | 36219277 | 522253  | 6  | CCSER1                                                                                                                                                                          |
| 6 | 36219277 | 36662626 | 443350  | 4  | MMRN1, SNCA                                                                                                                                                                     |
| 6 | 36662626 | 36946706 | 284081  | 5  | .                                                                                                                                                                               |
| 6 | 41086945 | 41102846 | 15902   | 4  | .                                                                                                                                                                               |
| 6 | 41102846 | 41333703 | 230858  | 4  | .                                                                                                                                                                               |
| 6 | 41333703 | 42137451 | 803749  | 4  | KCNIP4, LOC100138737, MIR218-1, PACRGL, SLIT2                                                                                                                                   |
| 6 | 43139934 | 43168885 | 28952   | 3  | KCNIP4                                                                                                                                                                          |
| 6 | 43168885 | 43628920 | 460036  | 3  | KCNIP4, LOC104972732, LOC782172                                                                                                                                                 |
| 6 | 43628920 | 43927191 | 298272  | 2  | ADGRA3, LOC101904854                                                                                                                                                            |
| 6 | 43927191 | 44259004 | 331814  | 3  | GBA3                                                                                                                                                                            |
| 6 | 44259004 | 45006656 | 747653  | 2  | LOC104972733, LOC107132564                                                                                                                                                      |
| 6 | 45006656 | 45268654 | 261999  | 6  | PPARGC1A                                                                                                                                                                        |
| 6 | 45268654 | 45755125 | 486472  | 2  | .                                                                                                                                                                               |
| 6 | 46396270 | 46532050 | 135781  | 4  | SEPSECS                                                                                                                                                                         |
| 6 | 46532050 | 46804412 | 272363  | 6  | ANAPC4, LOC101905518, PI4K2B, ZCCHC4                                                                                                                                            |
| 6 | 46804412 | 46810205 | 5794    | 8  | .                                                                                                                                                                               |
| 6 | 46810205 | 46862906 | 52702   | 8  | LOC104970156                                                                                                                                                                    |
| 6 | 46862906 | 47259965 | 397060  | 3  | LOC104968857, SEL1L3, SLC34A2, SMIM20, TRNAA-UGC                                                                                                                                |
| 6 | 48649938 | 48724873 | 74936   | 2  | .                                                                                                                                                                               |
| 6 | 48724873 | 48738248 | 13376   | 2  | .                                                                                                                                                                               |
| 6 | 48738248 | 48838466 | 100219  | 3  | .                                                                                                                                                                               |
| 6 | 48838466 | 48956663 | 118198  | 3  | .                                                                                                                                                                               |
| 6 | 48956663 | 49229815 | 273153  | 4  | .                                                                                                                                                                               |
| 6 | 49229815 | 49405584 | 175770  | 3  | .                                                                                                                                                                               |
| 6 | 49405584 | 49663465 | 257882  | 2  | .                                                                                                                                                                               |
| 6 | 49663465 | 49832730 | 169266  | 2  | .                                                                                                                                                                               |
| 6 | 49832730 | 50120022 | 287293  | 4  | LOC107132565                                                                                                                                                                    |
| 6 | 50120022 | 50291734 | 171713  | 4  | .                                                                                                                                                                               |
| 6 | 50291734 | 50674431 | 382698  | 2  | LOC100298058, TRNAS-GGA                                                                                                                                                         |
| 6 | 50674431 | 50753830 | 79400   | 2  | .                                                                                                                                                                               |
| 6 | 50753830 | 50909774 | 155945  | 2  | .                                                                                                                                                                               |
| 6 | 50909774 | 50991725 | 81952   | 2  | .                                                                                                                                                                               |
| 6 | 52334765 | 52358451 | 23687   | 2  | .                                                                                                                                                                               |
| 6 | 52358451 | 52467416 | 108966  | 2  | LOC784827                                                                                                                                                                       |
| 6 | 52467416 | 52486573 | 19158   | 2  | .                                                                                                                                                                               |
| 6 | 52486573 | 52589394 | 102822  | 2  | .                                                                                                                                                                               |
| 6 | 53101390 | 53245790 | 144401  | 2  | .                                                                                                                                                                               |
| 6 | 53799194 | 54511182 | 711989  | 4  | .                                                                                                                                                                               |
| 6 | 54511182 | 54664692 | 153511  | 6  | TRNAC-GCA                                                                                                                                                                       |
| 6 | 54664692 | 54794332 | 129641  | 4  | .                                                                                                                                                                               |
| 6 | 54794332 | 55182575 | 388244  | 3  | .                                                                                                                                                                               |
| 6 | 56957766 | 57419866 | 462101  | 5  | ARAP2, LOC781670                                                                                                                                                                |
| 6 | 57419866 | 57759068 | 339203  | 8  | ARAP2, DTHD1                                                                                                                                                                    |
| 6 | 57759068 | 57803509 | 44442   | 11 | .                                                                                                                                                                               |
| 6 | 57803509 | 57844452 | 40944   | 10 | .                                                                                                                                                                               |
| 6 | 57844452 | 57913813 | 69362   | 9  | LOC104972734                                                                                                                                                                    |
| 6 | 57913813 | 57916916 | 3104    | 6  | LOC104972734                                                                                                                                                                    |
| 6 | 57916916 | 58294387 | 377472  | 7  | LOC104972734, LOC104972735                                                                                                                                                      |
| 6 | 63733355 | 64613770 | 880416  | 6  | LOC101906152, TRNAC-ACA                                                                                                                                                         |
| 6 | 64613770 | 65124356 | 510587  | 13 | KCTD8, LOC100848032                                                                                                                                                             |
| 6 | 65124356 | 65495708 | 371353  | 10 | GNPDA2, GUF1, LOC104968873, LOC104972745, TRNAC-ACA, YIPF7                                                                                                                      |
| 6 | 65495708 | 67161799 | 1666092 | 9  | GABRA2, GABRG1, LOC100139936, LOC100298320, LOC104972745, LOC104972749, LOC107131339, LOC784591, TRNAW-CCA                                                                      |
| 6 | 67161799 | 68180823 | 1019025 | 16 | ATP10D, COMMD8, COX7B2, GABRA4, GABRB1, LOC781223                                                                                                                               |
| 6 | 68180823 | 68336991 | 156169  | 17 | ATP10D, CORIN, LOC101906472, TRNAC-GCA                                                                                                                                          |
| 6 | 68336991 | 69743581 | 1406591 | 10 | CNGA1, CORIN, CWH43, DCUN1D4, FRYL, LOC101905687, LOC104968875, LOC104968876, NFXL1, NIPAL1, OCIAD1, OCIAD2, SLAIN2, SLC10A4, TEC, TRNASTOP-UCA, TXK, ZAR1                      |
| 6 | 69743581 | 69981769 | 238189  | 5  | LOC107132568, LRRC66, SGCB, SPATA18                                                                                                                                             |
| 6 | 69981769 | 72097370 | 2115602 | 14 | CHIC2, DANCR, FIP1L1, GSX2, KIT, LNX1, LOC100296505, LOC100296974, LOC100847183, LOC101905946, LOC101906021, LOC101906092, LOC104968884, MIR4449, PDGFRA, RASL11B, SCFD2, USP46 |
| 6 | 76176091 | 76432765 | 256675  | 5  | .                                                                                                                                                                               |
| 6 | 76432765 | 77451977 | 1019213 | 4  | LOC100141023                                                                                                                                                                    |
| 6 | 77895593 | 78296831 | 401239  | 3  | .                                                                                                                                                                               |
| 6 | 87965199 | 88038537 | 73339   | 2  | AMTN                                                                                                                                                                            |
| 6 | 88038537 | 88404577 | 366041  | 2  | AMBEN, ENAM, GRSF1, JCHAIN, LOC100848253, LOC101905786, MOB1B, RUFY3, UTP3                                                                                                      |
| 6 | 88404577 | 89568233 | 1163657 | 3  | ADAMTS3, DCK, GC, LOC782958, NPFFR2, SLC4A4                                                                                                                                     |
| 6 | 89568233 | 90111673 | 543441  | 2  | ADAMTS3, TRNAC-GCA                                                                                                                                                              |
| 6 | 90111673 | 91324655 | 1212983 | 2  | AFM, AFP, ALB, ANKRD17, COX18, CXCL2, CXCL3, CXCL5, CXCL8, GRO1, LOC100140503, LOC100847175, LOC101906736, LOC107132573, LOC107132574, LOC534181, MTHFD2L, PF4, PPBP, RASSF6    |
| 6 | 94209669 | 94457428 | 247760  | 2  | CXCL13, LOC100137799, LOC100139130                                                                                                                                              |
| 6 | 94457428 | 94519611 | 62184   | 4  | .                                                                                                                                                                               |
| 6 | 94519611 | 94818224 | 298614  | 2  | CNOT6L, LOC107131294, MRPL1                                                                                                                                                     |

|   |           |           |         |    |                                                                                                                                                                                                                                                                                                                                                                                                   |
|---|-----------|-----------|---------|----|---------------------------------------------------------------------------------------------------------------------------------------------------------------------------------------------------------------------------------------------------------------------------------------------------------------------------------------------------------------------------------------------------|
| 6 | 94818224  | 95400444  | 582221  | 3  | LOC101902382, LOC107131184                                                                                                                                                                                                                                                                                                                                                                        |
| 6 | 98750261  | 99047763  | 297503  | 5  | .                                                                                                                                                                                                                                                                                                                                                                                                 |
| 6 | 99047763  | 99106892  | 59130   | 3  | .                                                                                                                                                                                                                                                                                                                                                                                                 |
| 6 | 99106892  | 99250485  | 143594  | 2  | .                                                                                                                                                                                                                                                                                                                                                                                                 |
| 6 | 100969075 | 101015489 | 46415   | 2  | .                                                                                                                                                                                                                                                                                                                                                                                                 |
| 7 | 251220    | 679297    | 428078  | 2  | CNOT6, FLT4, LOC100125913, LOC101902704, LOC101902742                                                                                                                                                                                                                                                                                                                                             |
| 7 | 24802266  | 26174090  | 1371825 | 2  | ADAMTS19, CHSY3, KIAA1024L, LOC789648, TRNAQ-UUG                                                                                                                                                                                                                                                                                                                                                  |
| 7 | 26174090  | 26206792  | 32703   | 3  | .                                                                                                                                                                                                                                                                                                                                                                                                 |
| 7 | 26206792  | 26354985  | 148194  | 4  | ISOC1, SLC27A6                                                                                                                                                                                                                                                                                                                                                                                    |
| 7 | 26354985  | 27471924  | 1116940 | 5  | FBN2, LOC104969125, LOC107132618, SLC12A2, SLC27A6                                                                                                                                                                                                                                                                                                                                                |
| 7 | 27471924  | 27585887  | 113964  | 3  | LOC107132618                                                                                                                                                                                                                                                                                                                                                                                      |
| 7 | 27692130  | 27895171  | 203042  | 3  | LOC101904034, LOC107132618, PRRC1                                                                                                                                                                                                                                                                                                                                                                 |
| 7 | 27895171  | 28347916  | 452746  | 3  | C7H5orf63, LOC104969128, MEGF10                                                                                                                                                                                                                                                                                                                                                                   |
| 7 | 30151328  | 31066257  | 914930  | 3  | LOC104969139, LOC107132620, LOC789456, ZNF608                                                                                                                                                                                                                                                                                                                                                     |
| 7 | 35188358  | 35267381  | 79024   | 2  | .                                                                                                                                                                                                                                                                                                                                                                                                 |
| 7 | 36674555  | 37944481  | 1269927 | 4  | LOC100138116, LOC104969148                                                                                                                                                                                                                                                                                                                                                                        |
| 7 | 37944481  | 38268431  | 323951  | 3  | .                                                                                                                                                                                                                                                                                                                                                                                                 |
| 7 | 38268431  | 38275876  | 7446    | 3  | .                                                                                                                                                                                                                                                                                                                                                                                                 |
| 7 | 45014934  | 45725639  | 710706  | 2  | ABCA7, APC2, ARID3A, ATP5D, AZU1, C7H19orf24, C7H19orf25, CBARP, CFD, CIRBP, CNN2, DAZAP1, EFNA2, ELANE, FGF22, FSTL3, GAMT, GPX4, GRIN3B, HCN2, HMHA1, KISS1R, LOC104972838, LOC107131164, LOC107132632, MED16, MIDN, MISP, MUM1, NDUFS7, PALM, PCSK4, PLPPR3, POLR2E, POLRMT, PRSS57, PRTN3, PTBP1, R3HDM4, REEP6, RNF126, RPS15, SBNO2, STK11, TMEM259, TRNAE-UUC, TRNAF-GAA, TRNAN-GUU, WDR18 |
| 7 | 45725639  | 46602147  | 876509  | 2  | ABHD17A, ADAT3, AFF4, ATP8B3, BTBD2, CSNK1G2, GDF9, HSPA4, KLF16, LEAP2, LOC104969170, LOC107131164, LOC107132633, LOC107132634, LOC781086, LOC781691, MBD3, MEX3D, MIR6120, PLK5, REXO1, SCAMP4, SHROOM1, SOWAHA, TCF3, UQCR11, UQCRQ, ZCCHC10                                                                                                                                                   |
| 7 | 55035843  | 55250130  | 214288  | 2  | LOC100298854, LOC107132644, LOC527450, LOC783976, LOC784019, LOC784050, LOC784477, LOC784598, OR4A16                                                                                                                                                                                                                                                                                              |
| 7 | 64903971  | 65069679  | 165709  | 6  | BERV-K1, FAT2, SLC36A1                                                                                                                                                                                                                                                                                                                                                                            |
| 7 | 65069679  | 65405962  | 336284  | 11 | ATOX1, G3BP1, GLRA1, LOC104969220, SPARC                                                                                                                                                                                                                                                                                                                                                          |
| 7 | 65405962  | 68171229  | 2765268 | 2  | FAM114A2, GALNT10, GLRA1, GRIA1, HAND1, LOC100140426, LOC100296765, LOC101903312, LOC104969222, LOC104969225, LOC784755, MFAP3, NMUR2, SAP30L, SMIM15                                                                                                                                                                                                                                             |
| 7 | 68171229  | 68605158  | 433930  | 5  | CNOT8, FAXDC2, GEMIN5, LARP1, LOC100335564, LOC101903541, LOC104969230, MRPL22                                                                                                                                                                                                                                                                                                                    |
| 7 | 68605158  | 69326742  | 721585  | 2  | LOC104969230, LOC107132652                                                                                                                                                                                                                                                                                                                                                                        |
| 7 | 69326742  | 70063537  | 736796  | 2  | LOC104969236, SGCD                                                                                                                                                                                                                                                                                                                                                                                |
| 7 | 70334735  | 70665842  | 331108  | 3  | HAVCR1, LOC107132653, SGCD, TIMD4, TRNAG-UCC                                                                                                                                                                                                                                                                                                                                                      |
| 7 | 70665842  | 71014173  | 348332  | 2  | LOC100294726, LOC101904859, LOC101905139, LOC101905257, LOC101907226, LOC101907274, LOC104969231, TIMD4                                                                                                                                                                                                                                                                                           |
| 7 | 71903551  | 71984425  | 80875   | 2  | LOC785534                                                                                                                                                                                                                                                                                                                                                                                         |
| 7 | 79283005  | 79625587  | 342583  | 3  | .                                                                                                                                                                                                                                                                                                                                                                                                 |
| 7 | 86432350  | 87056253  | 623904  | 2  | EDIL3                                                                                                                                                                                                                                                                                                                                                                                             |
| 7 | 93269435  | 93571127  | 301693  | 3  | LOC104968987, LOC507513, LOC789955                                                                                                                                                                                                                                                                                                                                                                |
| 7 | 93571127  | 94360798  | 789672  | 4  | ARRDC3, LOC101905238, LOC104968990, LOC104972872, LOC107132662                                                                                                                                                                                                                                                                                                                                    |
| 7 | 94360798  | 95003279  | 642482  | 11 | .                                                                                                                                                                                                                                                                                                                                                                                                 |
| 7 | 99463028  | 99494204  | 31177   | 2  | .                                                                                                                                                                                                                                                                                                                                                                                                 |
| 7 | 99494204  | 99558061  | 63858   | 3  | .                                                                                                                                                                                                                                                                                                                                                                                                 |
| 7 | 99558061  | 99625815  | 67755   | 3  | .                                                                                                                                                                                                                                                                                                                                                                                                 |
| 7 | 99625815  | 99761008  | 135194  | 3  | .                                                                                                                                                                                                                                                                                                                                                                                                 |
| 7 | 103152585 | 103539377 | 386793  | 7  | LOC107132668                                                                                                                                                                                                                                                                                                                                                                                      |
| 7 | 103539377 | 103754516 | 215140  | 3  | LOC107132668                                                                                                                                                                                                                                                                                                                                                                                      |
| 7 | 103754516 | 103980266 | 225751  | 4  | .                                                                                                                                                                                                                                                                                                                                                                                                 |
| 7 | 103980266 | 104442596 | 462331  | 2  | LOC100847643, LOC104969005, LOC786268, SLCO4C1, SLCO6A1, TRNAE-UUC                                                                                                                                                                                                                                                                                                                                |
| 7 | 108291934 | 108966859 | 674926  | 5  | .                                                                                                                                                                                                                                                                                                                                                                                                 |
| 7 | 108966859 | 109072654 | 105796  | 4  | .                                                                                                                                                                                                                                                                                                                                                                                                 |
| 7 | 109072654 | 109164576 | 91923   | 3  | .                                                                                                                                                                                                                                                                                                                                                                                                 |
| 7 | 109164576 | 109182012 | 17437   | 3  | .                                                                                                                                                                                                                                                                                                                                                                                                 |
| 7 | 109182012 | 109200950 | 18939   | 3  | .                                                                                                                                                                                                                                                                                                                                                                                                 |
| 7 | 109200950 | 109517831 | 316882  | 3  | TRNAC-ACA                                                                                                                                                                                                                                                                                                                                                                                         |
| 7 | 110116023 | 110529365 | 413343  | 3  | LOC523504                                                                                                                                                                                                                                                                                                                                                                                         |
| 7 | 110529365 | 112131509 | 1602145 | 7  | FER, LOC100140403, LOC104969022, LOC104969024, LOC104969026, LOC107132674, LOC523504, MAN2A1, MIR2465, PJA2, RPL19                                                                                                                                                                                                                                                                                |
| 7 | 112131509 | 112235723 | 104215  | 2  | LOC104969027, LOC104969028                                                                                                                                                                                                                                                                                                                                                                        |
| 8 | 966610    | 1208763   | 242154  | 4  | CBR4, LOC101903041, MIR2467, SH3RF1                                                                                                                                                                                                                                                                                                                                                               |
| 8 | 1208763   | 2178035   | 969273  | 2  | AADAT, C8H4orf27, CLCN3, LOC100848912, LOC101904130, LOC101904351, LOC520638, LOC615521, MFAP3L, NEK1                                                                                                                                                                                                                                                                                             |
| 8 | 10468431  | 12031431  | 1563001 | 2  | ACO1, CCDC25, CLU, DDX58, ELP3, ESCO2, LOC100616098, LOC101907891, LOC104969266, LOC104969267, LOC104969268, MIR2469, NDUFB6, NUGGC, PBK, SCARA3, SCARA5, TMEM215, TOPORS, TRNAC-ACA                                                                                                                                                                                                              |
| 8 | 12031431  | 12177162  | 145732  | 3  | .                                                                                                                                                                                                                                                                                                                                                                                                 |
| 8 | 12177162  | 12531648  | 354487  | 4  | LOC100139644, TRNAC-ACA                                                                                                                                                                                                                                                                                                                                                                           |
| 8 | 12531648  | 13117071  | 585424  | 6  | LOC104969269, LOC104969270, LOC104969271                                                                                                                                                                                                                                                                                                                                                          |
| 8 | 13117071  | 13130716  | 13646   | 2  | LOC107132681                                                                                                                                                                                                                                                                                                                                                                                      |
| 8 | 13130716  | 13169166  | 38451   | 2  | MIR2285M-5                                                                                                                                                                                                                                                                                                                                                                                        |
| 8 | 14263406  | 14318457  | 55052   | 5  | .                                                                                                                                                                                                                                                                                                                                                                                                 |
| 8 | 14318457  | 14639811  | 321355  | 6  | .                                                                                                                                                                                                                                                                                                                                                                                                 |
| 8 | 14639811  | 14982948  | 343138  | 2  | .                                                                                                                                                                                                                                                                                                                                                                                                 |
| 8 | 14982948  | 15320997  | 338050  | 5  | LINGO2, MIR873, MIR876                                                                                                                                                                                                                                                                                                                                                                            |
| 8 | 15320997  | 15667796  | 346800  | 4  | LINGO2                                                                                                                                                                                                                                                                                                                                                                                            |
| 8 | 15667796  | 15716338  | 48543   | 6  | LINGO2                                                                                                                                                                                                                                                                                                                                                                                            |
| 8 | 15716338  | 15765399  | 49062   | 5  | LINGO2                                                                                                                                                                                                                                                                                                                                                                                            |
| 8 | 17184834  | 17568938  | 384105  | 2  | CAAP1, IFT74, LOC101904667, LRRC19, PLAA, TEK, TRNAC-GCA                                                                                                                                                                                                                                                                                                                                          |
| 8 | 19837985  | 20005984  | 168000  | 2  | LOC100296162, LOC104969286, LOC104969287                                                                                                                                                                                                                                                                                                                                                          |
| 8 | 20005984  | 20031875  | 25892   | 2  | .                                                                                                                                                                                                                                                                                                                                                                                                 |

|   |          |          |         |   |                                                                                                                                                                                                                                                                                                                                                                                                                                                                                                                                                                       |
|---|----------|----------|---------|---|-----------------------------------------------------------------------------------------------------------------------------------------------------------------------------------------------------------------------------------------------------------------------------------------------------------------------------------------------------------------------------------------------------------------------------------------------------------------------------------------------------------------------------------------------------------------------|
| 8 | 22692098 | 23269512 | 577415  | 4 | <i>IFN-TAU, IFN-tau-c1, IFNA16, IFNAC, IFNAD, IFNAG, IFNAH, IFNB3, IFNT2, IFNW1, INFAP, KLHL9, LOC100298530, LOC100298573, LOC100299481, LOC100335340, LOC100335490, LOC100337470, LOC100847720, LOC100847941, LOC104968438, LOC104969292, LOC104969295, LOC104969298, LOC104969299, LOC107132684, LOC107132685, LOC513706, LOC515485, LOC515953, LOC523244, LOC523509, LOC538620, LOC616463, LOC616977, LOC617112, LOC617135, LOC617556, LOC618801, LOC618859, LOC618943, LOC618947, LOC618985, LOC619113, LOC781778, LOC781815, LOC781853, LOC781948, LOC783912</i> |
| 8 | 23269512 | 23442890 | 173379  | 2 | <i>HACD4, IFNB1, IL6, LOC100848709, LOC101904152, LOC101904352, LOC107131314, LOC107132683, LOC107132686, LOC517108, LOC525550, LOC784525, LOC787343</i>                                                                                                                                                                                                                                                                                                                                                                                                              |
| 8 | 24973934 | 25500923 | 526990  | 4 | <i>DENND4C, HAUS6, LOC104969307, LOC107131197, LOC107132687, PLIN2, RPS6, RRAGA, SAXO1</i>                                                                                                                                                                                                                                                                                                                                                                                                                                                                            |
| 8 | 31318886 | 31506133 | 187248  | 2 | <i>MPDZ</i>                                                                                                                                                                                                                                                                                                                                                                                                                                                                                                                                                           |
| 8 | 35350784 | 35555906 | 205123  | 2 | <i>LOC101904827</i>                                                                                                                                                                                                                                                                                                                                                                                                                                                                                                                                                   |
| 8 | 41496231 | 42488158 | 991928  | 2 | <i>KCNV2, LOC100139044, LOC101905621, LOC101905770, LOC101905923, LOC101905994, LOC104969336, LOC104972899, LOC107131327, LOC107132691, PUM3, RFX3, VLDLR</i>                                                                                                                                                                                                                                                                                                                                                                                                         |
| 8 | 43739945 | 43752061 | 12117   | 2 | .                                                                                                                                                                                                                                                                                                                                                                                                                                                                                                                                                                     |
| 8 | 43752061 | 44388345 | 636285  | 4 | <i>DMRT1, DMRT2, DMRT3, KANK1, LOC101906315</i>                                                                                                                                                                                                                                                                                                                                                                                                                                                                                                                       |
| 8 | 44388345 | 44467119 | 78775   | 6 | <i>DOCK8, KANK1</i>                                                                                                                                                                                                                                                                                                                                                                                                                                                                                                                                                   |
| 8 | 44467119 | 44774042 | 306924  | 7 | <i>CBWD2, DOCK8, LOC101906398, LOC529657</i>                                                                                                                                                                                                                                                                                                                                                                                                                                                                                                                          |
| 8 | 45600092 | 46492323 | 892232  | 2 | <i>APBA1, C8H9orf135, FAM189A2, FXN, LOC101902390, LOC104969349, PTAR1, TJP2, TRNAY-GUA</i>                                                                                                                                                                                                                                                                                                                                                                                                                                                                           |
| 8 | 46492323 | 46658362 | 166040  | 2 | .                                                                                                                                                                                                                                                                                                                                                                                                                                                                                                                                                                     |
| 8 | 47906136 | 48157753 | 251618  | 2 | <i>LOC107132693</i>                                                                                                                                                                                                                                                                                                                                                                                                                                                                                                                                                   |
| 8 | 48157753 | 48314369 | 156617  | 3 | .                                                                                                                                                                                                                                                                                                                                                                                                                                                                                                                                                                     |
| 8 | 48314369 | 48361186 | 46818   | 4 | .                                                                                                                                                                                                                                                                                                                                                                                                                                                                                                                                                                     |
| 8 | 48361186 | 48550867 | 189682  | 3 | <i>LOC101904574, TMEM2</i>                                                                                                                                                                                                                                                                                                                                                                                                                                                                                                                                            |
| 8 | 53852427 | 54953273 | 1100847 | 2 | <i>CEP78, GNA14, GNAQ, LOC101907250, LOC104969366, LOC104972905, LOC107132694, PSAT1, VPS13A</i>                                                                                                                                                                                                                                                                                                                                                                                                                                                                      |
| 8 | 54953273 | 55341984 | 388712  | 4 | <i>LOC515468</i>                                                                                                                                                                                                                                                                                                                                                                                                                                                                                                                                                      |
| 8 | 55341984 | 55461686 | 119703  | 3 | .                                                                                                                                                                                                                                                                                                                                                                                                                                                                                                                                                                     |
| 8 | 61532015 | 62479739 | 947725  | 2 | <i>FBXO10, GRHPR, LOC100849747, LOC101904207, LOC101907860, LOC104972910, PAX5, POLR1E, TOMM5, TRNAC-GCA, ZBTB5, ZCCHC7</i>                                                                                                                                                                                                                                                                                                                                                                                                                                           |
| 8 | 62479739 | 62585496 | 105758  | 3 | <i>FRMPD1, LOC101909682</i>                                                                                                                                                                                                                                                                                                                                                                                                                                                                                                                                           |
| 8 | 62585496 | 63176337 | 590842  | 3 | <i>DCAF10, EXOSC3, FRMPD1, LOC101904753, LOC101905995, LOC104969378, LOC104969379, LOC514189, LOC782838, MIR2472, MIR2473, MIR2474, SHB, SLC25A51, TRMT10B</i>                                                                                                                                                                                                                                                                                                                                                                                                        |
| 8 | 65364422 | 65476773 | 112352  | 6 | <i>LOC101908166</i>                                                                                                                                                                                                                                                                                                                                                                                                                                                                                                                                                   |
| 8 | 65476773 | 66108488 | 631716  | 5 | <i>ERP44, INVS, LOC101908166, LOC107132702, NR4A3, STX17, TEX10</i>                                                                                                                                                                                                                                                                                                                                                                                                                                                                                                   |
| 8 | 66108488 | 66131519 | 23032   | 4 | .                                                                                                                                                                                                                                                                                                                                                                                                                                                                                                                                                                     |
| 8 | 66131519 | 66179554 | 48036   | 6 | <i>LOC527795</i>                                                                                                                                                                                                                                                                                                                                                                                                                                                                                                                                                      |
| 8 | 66179554 | 66266313 | 86760   | 5 | <i>LOC101902217, LOC527795</i>                                                                                                                                                                                                                                                                                                                                                                                                                                                                                                                                        |
| 8 | 66266313 | 66525208 | 258896  | 4 | <i>LOC100297540, LOC101902217, LOC107132703, LOC107132704, LOC784042, LOC784079, LOC784731</i>                                                                                                                                                                                                                                                                                                                                                                                                                                                                        |
| 8 | 67704620 | 68044247 | 339628  | 2 | <i>LOC100298923, LOC100848109, LOC784966, LPL</i>                                                                                                                                                                                                                                                                                                                                                                                                                                                                                                                     |
| 8 | 69722173 | 69910884 | 188712  | 3 | <i>GFRA2, TRNAC-GCA, TRNAG-UCC</i>                                                                                                                                                                                                                                                                                                                                                                                                                                                                                                                                    |
| 8 | 69910884 | 70504019 | 593136  | 3 | <i>BMP1, DMTN, DOK2, FAM160B2, GFRA2, HR, LIG3, LOC104969383, LOC104969384, MIR320A-1, NPM2, NUDT18, PHYHIP, PIWIL2, POLR3D, REEP4, SFTPC, TRNAG-CCC, XPO7</i>                                                                                                                                                                                                                                                                                                                                                                                                        |
| 8 | 70504019 | 71198441 | 694423  | 2 | <i>BIN3, C8H9orf58, CCAR2, EGR3, LOC104969396, LOC107132705, PDLIM2, PEBP4, PIWIL2, PPP3CC, RHOBTB2, SLC39A14, SORBS3</i>                                                                                                                                                                                                                                                                                                                                                                                                                                             |
| 8 | 71691617 | 71821814 | 130198  | 2 | <i>ENTPD4, LOC104972922, LOXL2</i>                                                                                                                                                                                                                                                                                                                                                                                                                                                                                                                                    |
| 8 | 71821814 | 72101145 | 279332  | 2 | <i>ENTPD4, LOC101904726, LOC107132707, NKX2-6, NKX3-1, SLC25A37</i>                                                                                                                                                                                                                                                                                                                                                                                                                                                                                                   |
| 8 | 73860300 | 74224793 | 364494  | 2 | <i>CDCA2, DOCK5, GNRH1, KCTD9, LOC107132709, MIR2285AE</i>                                                                                                                                                                                                                                                                                                                                                                                                                                                                                                            |
| 8 | 76297003 | 76792433 | 495431  | 5 | <i>APTX, BAGALT1, CHRNA2, DNAJA1, EPHX2, GULO, LOC100848199, LOC101902886, LOC107132710, LOC107132711, LOC781261, LOC781381, PTK2B, SMU1, SPINK4</i>                                                                                                                                                                                                                                                                                                                                                                                                                  |
| 8 | 76792433 | 77203530 | 411098  | 4 | <i>AQP3, AQP7, BAG1, CHMP5, LOC107131236, NFX1, NOL6, UBAP2, UBE2R2</i>                                                                                                                                                                                                                                                                                                                                                                                                                                                                                               |
| 8 | 77203530 | 77298073 | 94544   | 2 | <i>DCAF12, UBAP2</i>                                                                                                                                                                                                                                                                                                                                                                                                                                                                                                                                                  |
| 8 | 77298073 | 78042268 | 744196  | 2 | <i>ARID3C, C8H9orf24, CCL19, CCL21, CCL27, CNTFR, DCAF12, DCTN3, DNAI1, ENHO, FAM205A, FAM219A, GALT, IL11RA, KIF24, LOC104969408, LOC508933, LOC783070, NUDT2, RASEF, RPP25L, SIGMAR1, UBAP1</i>                                                                                                                                                                                                                                                                                                                                                                     |
| 8 | 80774245 | 80988795 | 214551  | 6 | <i>AGTPBP1, LOC784808</i>                                                                                                                                                                                                                                                                                                                                                                                                                                                                                                                                             |
| 8 | 80988795 | 81389376 | 400582  | 5 | <i>C8H9orf153, GOLM1, ISCA1, LOC101906316, NAA35, ZCCHC6</i>                                                                                                                                                                                                                                                                                                                                                                                                                                                                                                          |
| 8 | 89229645 | 89341375 | 111731  | 3 | .                                                                                                                                                                                                                                                                                                                                                                                                                                                                                                                                                                     |
| 8 | 89341375 | 89458582 | 117208  | 3 | <i>LOC101902908</i>                                                                                                                                                                                                                                                                                                                                                                                                                                                                                                                                                   |
| 8 | 89458582 | 89551775 | 93194   | 3 | <i>LOC101902908</i>                                                                                                                                                                                                                                                                                                                                                                                                                                                                                                                                                   |
| 8 | 89551775 | 89778476 | 226702  | 3 | <i>LOC100336643</i>                                                                                                                                                                                                                                                                                                                                                                                                                                                                                                                                                   |
| 8 | 89778476 | 89822039 | 43564   | 6 | .                                                                                                                                                                                                                                                                                                                                                                                                                                                                                                                                                                     |
| 8 | 89822039 | 89829752 | 7714    | 5 | .                                                                                                                                                                                                                                                                                                                                                                                                                                                                                                                                                                     |
| 8 | 89829752 | 89854996 | 25245   | 4 | .                                                                                                                                                                                                                                                                                                                                                                                                                                                                                                                                                                     |
| 8 | 89854996 | 89906249 | 51254   | 3 | .                                                                                                                                                                                                                                                                                                                                                                                                                                                                                                                                                                     |
| 8 | 89906249 | 89989985 | 83737   | 2 | .                                                                                                                                                                                                                                                                                                                                                                                                                                                                                                                                                                     |
| 8 | 89989985 | 90357779 | 367795  | 2 | .                                                                                                                                                                                                                                                                                                                                                                                                                                                                                                                                                                     |
| 8 | 91240353 | 91387494 | 147142  | 2 | .                                                                                                                                                                                                                                                                                                                                                                                                                                                                                                                                                                     |
| 8 | 91387494 | 91649076 | 261583  | 3 | <i>LOC100140258, NXNL2</i>                                                                                                                                                                                                                                                                                                                                                                                                                                                                                                                                            |
| 8 | 91649076 | 91991292 | 342217  | 3 | <i>LOC100298873, LOC101902554, LOC101902749, LOC104969476, SPIN1</i>                                                                                                                                                                                                                                                                                                                                                                                                                                                                                                  |
| 8 | 91991292 | 92276536 | 285245  | 2 | <i>CDK20, FBXW12, LOC101904508, LOC107132723, LOC617539</i>                                                                                                                                                                                                                                                                                                                                                                                                                                                                                                           |
| 8 | 92276536 | 92299561 | 23026   | 2 | .                                                                                                                                                                                                                                                                                                                                                                                                                                                                                                                                                                     |
| 8 | 92299561 | 92478137 | 178577  | 2 | <i>MURC, TMEFF1</i>                                                                                                                                                                                                                                                                                                                                                                                                                                                                                                                                                   |
| 8 | 92556259 | 92911505 | 355247  | 2 | <i>LOC104969481</i>                                                                                                                                                                                                                                                                                                                                                                                                                                                                                                                                                   |
| 8 | 92911505 | 93056211 | 144707  | 5 | <i>PLPPR1</i>                                                                                                                                                                                                                                                                                                                                                                                                                                                                                                                                                         |

|   |           |           |         |    |                                                                                                                                                                                                         |
|---|-----------|-----------|---------|----|---------------------------------------------------------------------------------------------------------------------------------------------------------------------------------------------------------|
| 8 | 93056211  | 93350931  | 294721  | 5  | ALDOB, LOC104969482, LOC530653, LOC786798, MRPL50, PLPPR1, TMEM246, ZNF189                                                                                                                              |
| 8 | 93350931  | 93393803  | 42873   | 5  | TMEM246                                                                                                                                                                                                 |
| 8 | 93393803  | 94093105  | 699303  | 8  | GRIN3A, LOC101906606, LOC101906688, LOC104969483, LOC107132724, PPP3R2, RNF20                                                                                                                           |
| 8 | 94093105  | 94846979  | 753875  | 8  | CYLC2, LOC104972935                                                                                                                                                                                     |
| 8 | 94846979  | 95256966  | 409988  | 6  | .                                                                                                                                                                                                       |
| 8 | 95256966  | 95265313  | 8348    | 9  | .                                                                                                                                                                                                       |
| 8 | 95265313  | 95324801  | 59489   | 9  | .                                                                                                                                                                                                       |
| 8 | 95324801  | 95647189  | 322389  | 9  | LOC104972936                                                                                                                                                                                            |
| 8 | 95647189  | 95731163  | 83975   | 4  | .                                                                                                                                                                                                       |
| 8 | 95731163  | 96328919  | 597757  | 3  | LOC100337180, LOC101906834, LOC101906978, LOC107132725, LOC107132728, LOC107132729, LOC107132730, LOC509830, OR13F1, SMC2                                                                               |
| 8 | 96328919  | 96765790  | 436872  | 2  | LOC100140461, LOC107132726, LOC107132727, LOC513099, LOC783328, LOC783367, LOC788390, LOC788401, LOC789766, LOC789787, LOC789802, LOC789810, LOC789812, LOC789815, LOC789817, LOC789943, OR13C3, OR13C8 |
| 8 | 96765790  | 96785852  | 20063   | 3  | .                                                                                                                                                                                                       |
| 8 | 96785852  | 97682095  | 896244  | 3  | ABCA1, FKTN, FSD1L, LOC101902998, LOC104969470, LOC785559, LOC785644, NIPSNAP3A, SLC44A1, TAL2                                                                                                          |
| 8 | 100295224 | 100325688 | 30465   | 2  | .                                                                                                                                                                                                       |
| 8 | 100325688 | 101682436 | 1356749 | 3  | ACTL7A, ACTL7B, CTNNAL1, EPB41L4B, FAM206A, FRRS1L, IKBKAP, LOC100847230, LOC104969439, LOC107132734, LOC783421, MIR32, PALM2, PTPN3, TMEM245, TRNAC-GCA, TRNAE-UUC                                     |
| 8 | 102581024 | 102780465 | 199442  | 6  | LOC101907488, LPAR1, TRNAC-GCA                                                                                                                                                                          |
| 8 | 102780465 | 102816330 | 35866   | 5  | MIR2285N-5                                                                                                                                                                                              |
| 8 | 102816330 | 103279305 | 462976  | 4  | KIAA0368, LOC539574, PTGR1, ZNF483                                                                                                                                                                      |
| 8 | 103279305 | 103613163 | 333859  | 7  | C8H9orf84, DNAJC25, GNG10, LOC104972945, MIR7863, TRNAC-ACA, UGCG                                                                                                                                       |
| 8 | 103613163 | 104269620 | 656458  | 2  | HSDL2, INIP, KIAA1958, LOC101905894, LOC534155, PTBP3, SUSD1                                                                                                                                            |
| 8 | 104269620 | 104566787 | 297168  | 2  | INIP, LOC101906267, LOC104969447, LOC104969451, LOC513329, LOC783399, SLC46A2, SNX30                                                                                                                    |
| 8 | 106244842 | 106853824 | 608983  | 2  | LOC101908167, LOC104969458, LOC107132740, TNC, TNFSF15, TNFSF8                                                                                                                                          |
| 8 | 106853824 | 106918003 | 64180   | 2  | .                                                                                                                                                                                                       |
| 8 | 108615037 | 109083273 | 468237  | 6  | ASTN2, TRNAS-AGA                                                                                                                                                                                        |
| 8 | 109083273 | 109352447 | 269175  | 4  | .                                                                                                                                                                                                       |
| 8 | 111031030 | 111315197 | 284168  | 5  | BRINP1                                                                                                                                                                                                  |
| 8 | 111315197 | 111643825 | 328629  | 4  | LOC101903765                                                                                                                                                                                            |
| 8 | 111643825 | 111657155 | 13331   | 3  | LOC100848999, LOC101903765, LOC104968520                                                                                                                                                                |
| 9 | 5788      | 157338    | 151551  | 3  | LOC100139593, LOC100336757                                                                                                                                                                              |
| 9 | 157338    | 321444    | 164107  | 4  | LOC784048, LOC786133, LOC788937, LOC788947, LOC789025, LOC789033                                                                                                                                        |
| 9 | 321444    | 1137141   | 815698  | 5  | LOC107132746, LOC616304, PHF3, PTP4A1                                                                                                                                                                   |
| 9 | 2974899   | 3467064   | 492166  | 2  | .                                                                                                                                                                                                       |
| 9 | 20961034  | 21039749  | 78716   | 5  | .                                                                                                                                                                                                       |
| 9 | 21039749  | 21192036  | 152288  | 4  | .                                                                                                                                                                                                       |
| 9 | 21192036  | 21723680  | 531645  | 6  | LOC104972971                                                                                                                                                                                            |
| 9 | 21723680  | 23133818  | 1410139 | 2  | FAM46A, IBTK, LOC100138784, LOC101906475, LOC104969506, LOC107132757, TPBG                                                                                                                              |
| 9 | 27337323  | 27664454  | 327132  | 2  | .                                                                                                                                                                                                       |
| 9 | 27664454  | 29613821  | 1949368 | 7  | CLVS2, FABP7, HSF2, LOC100848869, LOC101904186, LOC101905260, LOC101908885, LOC101909028, LOC107132761, LOC781754, MIR2478, PKIB, SERINC1, SMPDL3A, TRDN                                                |
| 9 | 29613821  | 31022040  | 1408220 | 4  | GJA1, LOC100295149, LOC101905771, LOC104969516, TBC1D32                                                                                                                                                 |
| 9 | 31022040  | 31044751  | 22712   | 6  | .                                                                                                                                                                                                       |
| 9 | 31044751  | 31198107  | 153357  | 8  | .                                                                                                                                                                                                       |
| 9 | 31198107  | 31218966  | 20860   | 9  | .                                                                                                                                                                                                       |
| 9 | 31218966  | 33634792  | 2415827 | 9  | ASF1A, CEP85L, FAM184A, LOC100848035, LOC101906051, LOC104969513, LOC614138, LOC782839, MAN1A1, MCM9, PLN, SLC35F1, TRNAK-UUU, TRNAV-CAC                                                                |
| 9 | 35417671  | 35987129  | 569459  | 3  | LOC100140173                                                                                                                                                                                            |
| 9 | 43486563  | 43977997  | 491435  | 4  | BEND3, C9H6orf203, CD24, LOC100137843, LOC104969546, LOC107132765, LOC614649, PDSS2, QRSL1                                                                                                              |
| 9 | 43977997  | 44173280  | 195284  | 5  | AIM1, QRSL1, RTN4IP1                                                                                                                                                                                    |
| 9 | 44173280  | 44192510  | 19231   | 6  | AIM1                                                                                                                                                                                                    |
| 9 | 44192510  | 45282530  | 1090021 | 5  | AIM1, ATG5, LOC100336714, LOC100847546, LOC104969548, LOC104972981, LOC107132766, LOC781322, LOC784251, PRDM1                                                                                           |
| 9 | 45282530  | 46382936  | 1100407 | 5  | BVES, HACE1, LOC100138772, LOC101902273, LOC104969553, POPDC3, PREP                                                                                                                                     |
| 9 | 46382936  | 46804617  | 421682  | 8  | LOC785087                                                                                                                                                                                               |
| 9 | 46804617  | 47195595  | 390979  | 10 | LOC101902933, TRNAC-ACA, TRNAM-CAU                                                                                                                                                                      |
| 9 | 47195595  | 47264584  | 68990   | 11 | .                                                                                                                                                                                                       |
| 9 | 47264584  | 49939450  | 2674867 | 10 | ASCC3, GRIK2, LOC104972983, LOC107132767, LOC528043, LOC783945                                                                                                                                          |
| 9 | 49939450  | 50065016  | 125567  | 4  | ASCC3                                                                                                                                                                                                   |
| 9 | 50065016  | 50231581  | 166566  | 5  | ASCC3, LOC518885                                                                                                                                                                                        |
| 9 | 50231581  | 50297434  | 65854   | 2  | ASCC3                                                                                                                                                                                                   |
| 9 | 50297434  | 52466829  | 2169396 | 3  | ASCC3, CCNC, COQ3, FAXC, FBXL4, LOC101904646, LOC101904783, LOC101904829, LOC104969561, LOC107132768, LOC107132769, LOC781964, LOC781989, MCHR2, PNISR, POU3F2, PRDM13, SIM1, TRNAC-GCA, TSTD3, USP45   |
| 9 | 52466829  | 53212056  | 745228  | 2  | LOC788043, TRNAS-GGA, TRNAY-GUA                                                                                                                                                                         |
| 9 | 53212056  | 53806563  | 594508  | 7  | KLHL32, LOC100848581, LOC104969563, MMS22L                                                                                                                                                              |
| 9 | 53806563  | 55006264  | 1199702 | 6  | FHL5, FUT9, GPR63, LOC100336742, LOC104969564, LOC107132770, LOC782007, NDUFAF4, TRNAC-GCA, TRNAG-UCC, UFL1                                                                                             |
| 9 | 55006264  | 55070966  | 64703   | 6  | .                                                                                                                                                                                                       |
| 9 | 55070966  | 56327104  | 1256139 | 6  | LOC783932, MANEA                                                                                                                                                                                        |

|    |           |           |         |    |                                                                                                                                                                                                                                                                                                                                                                      |
|----|-----------|-----------|---------|----|----------------------------------------------------------------------------------------------------------------------------------------------------------------------------------------------------------------------------------------------------------------------------------------------------------------------------------------------------------------------|
| 9  | 59994749  | 63677782  | 3683034 | 2  | AKIRIN2, ANKRD6, BACH2, CASP8AP2, CFAP206, CNR1, GABRR1, GABRR2, GJA10, LOC100140683, LOC100336843, LOC100847428, LOC101902479, LOC101903075, LOC104969735, LOC104970129, LOC107132771, LOC107132772, LOC107132773, LOC782675, LYRM2, MAP3K7, MDN1, MIR2903, MIR7862, ORC3, PM20D2, PNRC1, RARS2, RINGTT, RRAGD, SLC35A1, SPACA1, SRSF12, TRNAC-G, TRNAE-UUC, UBE2J1 |
| 9  | 63677782  | 63888234  | 210453  | 6  | C9H6orf163, GJB7, LOC104969583, LOC107132774, SMIM8, ZNF292                                                                                                                                                                                                                                                                                                          |
| 9  | 63888234  | 65176462  | 1288229 | 4  | CGA, HTR1E, LOC100174924, LOC509829, NT5E, SNX14, SYNCRIP, ZNF292                                                                                                                                                                                                                                                                                                    |
| 9  | 65176462  | 65285014  | 108553  | 3  | LOC100335322, LOC101906498, LOC104968426, LOC509791                                                                                                                                                                                                                                                                                                                  |
| 9  | 65285014  | 65312497  | 27484   | 2  | .                                                                                                                                                                                                                                                                                                                                                                    |
| 9  | 65312497  | 65692509  | 380013  | 4  | LOC101907349, LOC104970099                                                                                                                                                                                                                                                                                                                                           |
| 9  | 65692509  | 66291280  | 598772  | 4  | LOC101907627, LOC107132775, TBX18                                                                                                                                                                                                                                                                                                                                    |
| 9  | 72399930  | 73421315  | 1021386 | 2  | EYA4, LOC104969595, TCF21                                                                                                                                                                                                                                                                                                                                            |
| 9  | 84366153  | 84917546  | 551394  | 4  | EPM2A, FBXO30, GRM1, SHPRH                                                                                                                                                                                                                                                                                                                                           |
| 9  | 86227784  | 86352129  | 124346  | 2  | LOC100850276, SAMD5                                                                                                                                                                                                                                                                                                                                                  |
| 9  | 86352129  | 86711520  | 359392  | 3  | SAMD5                                                                                                                                                                                                                                                                                                                                                                |
| 9  | 86711520  | 88665014  | 1953495 | 8  | GINM1, KATNA1, LATS1, LOC100299874, LOC100336795, LOC101903261, LOC104969619, LOC104972992, LOC107131280, LOC107132784, LOC107132785, LOC107132786, LOC782566, LOC784274, LRP11, NUP43, PCMT1, PPL4, RAET1G, SASH1, TAB2, ULBP27, UST, ZC3H12D                                                                                                                       |
| 9  | 88665014  | 88819879  | 154866  | 6  | LOC104969628, LOC107132787, LOC513548, LOC786867, PPP1R14C, ULBP21                                                                                                                                                                                                                                                                                                   |
| 9  | 88819879  | 88999220  | 179342  | 3  | LOC100848282, PPP1R14C                                                                                                                                                                                                                                                                                                                                               |
| 9  | 88999220  | 89361599  | 362380  | 8  | IYD, LOC100848331, LOC104972994, LOC785982, PLEKHG1                                                                                                                                                                                                                                                                                                                  |
| 9  | 89361599  | 90914671  | 1553073 | 4  | AKAP12, ARMT1, CCDC170, ESR1, LOC100335416, LOC100848490, LOC101904510, LOC104969623, LOC104969627, LOC104972994, LOC104972995, LOC107131177, LOC107132788, LOC107132789, LOC107132790, MIR2285E-2, MTHFD1L, PLEKHG1, RMND1, SYNE1, ZBTB2                                                                                                                            |
| 9  | 90914671  | 91600639  | 685969  | 5  | FBXO5, LOC107131177, MTRF1L, MYCT1, RGS17, TRNAC-ACA, TRNAS-GGA, VIP                                                                                                                                                                                                                                                                                                 |
| 9  | 91600639  | 94000874  | 2400236 | 3  | CLDN20, CNKSR3, IPCEF1, LOC100298280, LOC100848475, LOC104970693, LOC104972996, LOC107132791, LOC616500, LOC616595, LOC617457, LOC783190, LOC788337, LOC789941, LOC789961, MIR2480, NOX3, OPRM1, OR4A15, OR4C6, SCAF8, TFB1M, TIAM2                                                                                                                                  |
| 9  | 94000874  | 94091133  | 90260   | 5  | .                                                                                                                                                                                                                                                                                                                                                                    |
| 9  | 94091133  | 94729591  | 638459  | 4  | LOC104969630                                                                                                                                                                                                                                                                                                                                                         |
| 9  | 104510643 | 104883534 | 372892  | 2  | DACT2, LOC101907159, LOC104969666, LOC107132802, LOC107132803, LOC788572, SMO2                                                                                                                                                                                                                                                                                       |
| 9  | 104883534 | 106206340 | 1322807 | 2  | C9H6orf120, DLL1, ERMARD, FAM120B, LOC101907681, LOC104969678, LOC107132805, LOC107132806, PDCD2, PHF10, PSMB1, TBP, TCTE3, THBS2, WDR27                                                                                                                                                                                                                             |
| 10 | 1184      | 99231     | 98048   | 14 | LOC104973003                                                                                                                                                                                                                                                                                                                                                         |
| 10 | 99231     | 897998    | 798768  | 4  | LOC101902502, LOC101902806, LOC101902859, LOC101909710, LOC104973003, LOC104973005, LOC783211, LOC783248, LOC787243, MCC                                                                                                                                                                                                                                             |
| 10 | 897998    | 1513285   | 615288  | 2  | APC, DCP2, EPB41L4A, LOC104973004, MCC, REEP5, SRP19                                                                                                                                                                                                                                                                                                                 |
| 10 | 1513285   | 1895590   | 382306  | 3  | EPB41L4A                                                                                                                                                                                                                                                                                                                                                             |
| 10 | 1895590   | 2056531   | 160942  | 3  | .                                                                                                                                                                                                                                                                                                                                                                    |
| 10 | 2056531   | 2509844   | 453314  | 6  | LOC101903138, LOC101903289, LOC104973030, LOC107132807, LOC785663, NREP, YTHDC2                                                                                                                                                                                                                                                                                      |
| 10 | 2509844   | 2657561   | 147718  | 7  | .                                                                                                                                                                                                                                                                                                                                                                    |
| 10 | 2657561   | 2678719   | 21159   | 4  | .                                                                                                                                                                                                                                                                                                                                                                    |
| 10 | 7794882   | 7805981   | 11100   | 2  | F2RL2, IQGAP2, LOC107132815                                                                                                                                                                                                                                                                                                                                          |
| 10 | 14032572  | 14657034  | 624463  | 2  | AAGAB, C10H15orf61, IQCH, LOC104973050, MAP2K5                                                                                                                                                                                                                                                                                                                       |
| 10 | 17498048  | 17886166  | 388119  | 2  | LARP6, LOC101903602, LOC104973065, LOC107132827, LRRC49, THAP10, UACA                                                                                                                                                                                                                                                                                                |
| 10 | 22054922  | 22453121  | 398200  | 3  | ABHD4, DAD1, LOC100336282, LOC100337215, LOC100337505, LOC101908015, LOC101908096, LOC104969841, LOC104973085, LOC785995, LOC786614                                                                                                                                                                                                                                  |
| 10 | 23333085  | 23469583  | 136499  | 2  | LOC100296102, LOC104968717, LOC104969863, LOC107131332, LOC107132829, LOC786594, LOC786608, LOC786717, LOC786802, LOC786881, TRNAW-CCA                                                                                                                                                                                                                               |
| 10 | 25647369  | 25702685  | 55317   | 2  | LOC522609, OR4E2                                                                                                                                                                                                                                                                                                                                                     |
| 10 | 31551834  | 32252502  | 700669  | 2  | TRNAC-GCA, TRNAS-AGA                                                                                                                                                                                                                                                                                                                                                 |
| 10 | 33975663  | 34620089  | 644427  | 2  | FAM98B, LOC104973119, LOC107132843, RASGRP1, SPRED1                                                                                                                                                                                                                                                                                                                  |
| 10 | 34620089  | 34714231  | 94143   | 3  | .                                                                                                                                                                                                                                                                                                                                                                    |
| 10 | 34714231  | 35136864  | 422634  | 2  | C10H15orf54, LOC104973121, LOC104973122, LOC107132846                                                                                                                                                                                                                                                                                                                |
| 10 | 35136864  | 35193883  | 57020   | 3  | LOC104973122                                                                                                                                                                                                                                                                                                                                                         |
| 10 | 35193883  | 35221127  | 27245   | 3  | .                                                                                                                                                                                                                                                                                                                                                                    |
| 10 | 45517223  | 46264103  | 746881  | 2  | CSNK1G1, DAPK2, FAM96A, KIAA0101, LOC100336855, LOC101905285, LOC101907658, LOC107132856, OAZ2, PPIB, RBPMS2, SNX1, SNX22, TRIP4, ZNF609                                                                                                                                                                                                                             |
| 10 | 55251483  | 55410939  | 159457  | 2  | LOC104973165, PIGB, RAB27A, RSL24D1                                                                                                                                                                                                                                                                                                                                  |
| 10 | 55410939  | 55584199  | 173261  | 2  | .                                                                                                                                                                                                                                                                                                                                                                    |
| 10 | 59586472  | 59709071  | 122600  | 2  | LOC104973172, TNFAIP8L3                                                                                                                                                                                                                                                                                                                                              |
| 10 | 59709071  | 60424977  | 715907  | 2  | AP4E1, GABPB1, HDC, LOC101906656, LOC101906715, LOC101906880, LOC101906954, LOC104973174, LOC107132871, LOC107132872, SPPL2A, TNFAIP8L3, TRPM7, USP50, USP8                                                                                                                                                                                                          |
| 10 | 60424977  | 60596181  | 171205  | 2  | ATP8B4, SLC27A2                                                                                                                                                                                                                                                                                                                                                      |
| 10 | 60596181  | 60688571  | 92391   | 5  | ATP8B4                                                                                                                                                                                                                                                                                                                                                               |
| 10 | 60688571  | 62824288  | 2135718 | 4  | ATP8B4, CEP152, COPS2, CTXN2, DTWD1, DUT, EID1, FAM227B, FBN1, FGF7, GALK2, LOC101907659, LOC104973175, LOC104973177, LOC107132866, LOC613512, MYEF2, SECISBP2L, SHC4, SLC12A1, SLC24A5                                                                                                                                                                              |
| 10 | 71608828  | 71705664  | 96837   | 2  | LOC104973193                                                                                                                                                                                                                                                                                                                                                         |
| 10 | 71862617  | 72049250  | 186634  | 2  | DAAM1                                                                                                                                                                                                                                                                                                                                                                |
| 10 | 72049250  | 72532880  | 483631  | 2  | CCDC175, DAAM1, GPR135, JKAMP, L3HYPDH, LOC104973196, LOC781059, RTN1                                                                                                                                                                                                                                                                                                |
| 10 | 72532880  | 72844509  | 311630  | 2  | LOC101902937, LOC537580, PCNX4, RTN1                                                                                                                                                                                                                                                                                                                                 |
| 10 | 72844509  | 73305474  | 460966  | 4  | C10H14orf39, DHRS7, PPM1A, SIX6, TRNAE-UUC, TRNAQ-UUG                                                                                                                                                                                                                                                                                                                |
| 10 | 75279800  | 75626927  | 347128  | 2  | KCNH5, LOC107132878                                                                                                                                                                                                                                                                                                                                                  |
| 10 | 77811225  | 78350723  | 539499  | 2  | FUT8, MAX, TRNAC-GCA                                                                                                                                                                                                                                                                                                                                                 |
| 10 | 78350723  | 78557862  | 207140  | 2  | FUT8, LOC104973214, LOC104973215                                                                                                                                                                                                                                                                                                                                     |
| 10 | 84474223  | 84599159  | 124937  | 2  | LOC104973236, RGS6, TRNAE-UUC                                                                                                                                                                                                                                                                                                                                        |



|    |           |           |         |    |                                                                                                                                                                                                                                                                                                                                                                                                                                         |
|----|-----------|-----------|---------|----|-----------------------------------------------------------------------------------------------------------------------------------------------------------------------------------------------------------------------------------------------------------------------------------------------------------------------------------------------------------------------------------------------------------------------------------------|
| 10 | 84994696  | 86057787  | 1063092 | 2  | ACOT2, ACOT4, ACOT6, BBOF1, C10H14orf169, COQ6, DCAF4, DNAL1, DPF3, ELMSAN1, ENTPD5, FAM161B, HEATR4, LOC100847232, LOC101903632, LOC101904062, LOC101905999, LOC504425, LOC512541, MIR7859, NUMB, PAPLN, PNMA1, PSEN1, PTGR2, RBM25, TRNAE-UUC, ZFYVE1, ZNF410                                                                                                                                                                         |
| 10 | 89582936  | 89711754  | 128819  | 3  | CIPC, LOC101904398, LOC101904443, ZDHHC22                                                                                                                                                                                                                                                                                                                                                                                               |
| 10 | 91214524  | 91478479  | 263956  | 5  | .                                                                                                                                                                                                                                                                                                                                                                                                                                       |
| 10 | 92766156  | 93033744  | 267589  | 2  | DIO2, LOC101905198, LOC104973262, TRNAC-GCA                                                                                                                                                                                                                                                                                                                                                                                             |
| 10 | 94614742  | 95133604  | 518863  | 2  | LOC104970660, LOC107132890, LOC785767                                                                                                                                                                                                                                                                                                                                                                                                   |
| 10 | 95133604  | 95208623  | 75020   | 2  | .                                                                                                                                                                                                                                                                                                                                                                                                                                       |
| 10 | 95208623  | 95324014  | 115392  | 2  | .                                                                                                                                                                                                                                                                                                                                                                                                                                       |
| 10 | 95324014  | 95406197  | 82184   | 2  | .                                                                                                                                                                                                                                                                                                                                                                                                                                       |
| 10 | 96423256  | 96627858  | 204603  | 2  | .                                                                                                                                                                                                                                                                                                                                                                                                                                       |
| 10 | 99167477  | 99877446  | 709970  | 2  | LOC511898, LOC616051, LOC785091, TRNAC-ACA                                                                                                                                                                                                                                                                                                                                                                                              |
| 10 | 100259170 | 100898371 | 639202  | 2  | LOC100295545                                                                                                                                                                                                                                                                                                                                                                                                                            |
| 10 | 103715935 | 104465097 | 749163  | 11 | CASC4, CTDSPL2, EIF3J, LOC101901960, LOC101902036, LOC101908218, LOC104973277, LOC107132892, PATL2, RPS6KA5, SPG11, TTC7B                                                                                                                                                                                                                                                                                                               |
| 10 | 104465097 | 104654089 | 188993  | 12 | B2M, C10H15orf43, LOC104973278, LOC508285, LOC783680, TRIM69                                                                                                                                                                                                                                                                                                                                                                            |
| 11 | 1141      | 75423     | 74283   | 4  | LOC786581, LOC786619, ZC3H6                                                                                                                                                                                                                                                                                                                                                                                                             |
| 11 | 75423     | 440285    | 364863  | 2  | FBLN7, MERTK, TMEM87B, ZC3H6, ZC3H8                                                                                                                                                                                                                                                                                                                                                                                                     |
| 11 | 8383146   | 8999583   | 616438  | 4  | LOC101903633, LOC101909815                                                                                                                                                                                                                                                                                                                                                                                                              |
| 11 | 8999583   | 9214697   | 215115  | 4  | LOC101909778, LOC101909815, LOC107132905, LOC107132906, MRPS9                                                                                                                                                                                                                                                                                                                                                                           |
| 11 | 10876798  | 11463279  | 586482  | 3  | ALMS1, CCT7, DUSP11, EGR4, FBXO41, LOC101902604, LOC101903026, LOC101903097, MIR2294, MIR2295, NOTO, PRADC1, RAB11FIP5, SFXN5, SMYD5, TPRKB                                                                                                                                                                                                                                                                                             |
| 11 | 13157358  | 13243265  | 85908   | 2  | DYSF, LOC101903215, ZNF638                                                                                                                                                                                                                                                                                                                                                                                                              |
| 11 | 13243265  | 13367286  | 124022  | 2  | ZNF638                                                                                                                                                                                                                                                                                                                                                                                                                                  |
| 11 | 14382588  | 14572571  | 189984  | 3  | LOC107132910, SRD5A2                                                                                                                                                                                                                                                                                                                                                                                                                    |
| 11 | 16562178  | 16756034  | 193857  | 4  | .                                                                                                                                                                                                                                                                                                                                                                                                                                       |
| 11 | 16756034  | 16761823  | 5790    | 3  | .                                                                                                                                                                                                                                                                                                                                                                                                                                       |
| 11 | 16761823  | 16842594  | 80772   | 5  | .                                                                                                                                                                                                                                                                                                                                                                                                                                       |
| 11 | 16842594  | 17466455  | 623862  | 5  | LOC107132909, LOC782032                                                                                                                                                                                                                                                                                                                                                                                                                 |
| 11 | 17466455  | 17878882  | 412428  | 4  | .                                                                                                                                                                                                                                                                                                                                                                                                                                       |
| 11 | 20780234  | 22242558  | 1462325 | 4  | ARHGEF33, ATL2, CDKL4, DHX57, GALM, GEMIN6, HNRNPLL, LOC100847282, LOC104973309, LOC104973310, LOC107132913, LOC107132914, LOC782437, LOC782845, LOC783737, MAP4K3, MIR2284Z-2, MORN2, SOS1, SRSF7, THUMP2D, TMEM178A                                                                                                                                                                                                                   |
| 11 | 26519082  | 26873588  | 354507  | 4  | CAMKMT, LOC101906743, PPM1B, PREPL, SLC3A1                                                                                                                                                                                                                                                                                                                                                                                              |
| 11 | 26873588  | 27456726  | 583139  | 2  | CAMKMT, LOC101906905, LOC104973324, LOC104973326, LOC107132919, SIX2, SIX3, TRNAE-UUC                                                                                                                                                                                                                                                                                                                                                   |
| 11 | 31859281  | 33134037  | 1274757 | 2  | NRXN1                                                                                                                                                                                                                                                                                                                                                                                                                                   |
| 11 | 34244293  | 36063575  | 1819283 | 2  | LOC101901933, LOC104973343                                                                                                                                                                                                                                                                                                                                                                                                              |
| 11 | 40086176  | 41325481  | 1239306 | 3  | FANCL, LOC107132926, TRNAC-ACA, TRNAC-GCA, VRK2                                                                                                                                                                                                                                                                                                                                                                                         |
| 11 | 43865434  | 44329286  | 463853  | 3  | EVA1A, GCFC2, KIAA1841, LOC100139010, LOC101904087, LOC104973365, LOC615002, MRPL19, SEPT10, SOWAHC                                                                                                                                                                                                                                                                                                                                     |
| 11 | 45205464  | 45357605  | 152142  | 3  | .                                                                                                                                                                                                                                                                                                                                                                                                                                       |
| 11 | 45357605  | 47265277  | 1907673 | 3  | C11H2orf40, CHCHD5, CKAP2L, IL1A, IL1B, IL1F10, IL1RN, IL36A, IL36B, IL36G, IL36RN, IL37, LOC100294952, LOC100335748, LOC100847269, LOC101903687, LOC101903923, LOC101904177, LOC104973371, LOC107132933, LOC107132936, LOC107132937, LOC532089, LOC614219, LOC786288, NCK2, NT5DC4, PAX8, POLR1B, PSD4, SLC20A1, ST6GAL2, TTL, UXS1                                                                                                    |
| 11 | 65532376  | 69582688  | 4050313 | 2  | AAK1, ANTXR1, ANXA4, APLF, ARHGAP25, ASPRV1, BMP10, C11H2orf42, C1D, CAPN13, CAPN14, CNRIP1, EHD3, ETAA1, FBXO48, GALNT14, GFPT1, GKN1, GKN2, GMCL1, LCLAT1, LOC100139826, LOC101904865, LOC101905499, LOC101905676, LOC104973409, LOC104973410, LOC104973411, LOC104973412, LOC107132938, LOC107132939, LOC509961, LOC786621, LOC787229, MXD1, NFU1, PCBP1, PCYOX1, PLEK, PNO1, PPP3R1, PROKR1, SNRNP27, SNRPG, TIA1, TRNAG-CCC, WDR92 |
| 11 | 69582688  | 69598132  | 15445   | 3  | LCLAT1                                                                                                                                                                                                                                                                                                                                                                                                                                  |
| 11 | 69598132  | 70386497  | 788366  | 2  | LBH, LCLAT1, LOC101905873, LOC104968430, YPEL5                                                                                                                                                                                                                                                                                                                                                                                          |
| 11 | 74496513  | 75047830  | 551318  | 2  | ADCY3, CENPO, DNAJC27, LOC107132952, NCOA1, PTRHD1                                                                                                                                                                                                                                                                                                                                                                                      |
| 11 | 76288153  | 76553347  | 265195  | 7  | LOC101908123, LOC107132946                                                                                                                                                                                                                                                                                                                                                                                                              |
| 11 | 79651365  | 80061687  | 410323  | 4  | OSR1                                                                                                                                                                                                                                                                                                                                                                                                                                    |
| 11 | 98013442  | 98401269  | 387828  | 3  | ANGPTL2, GARNL3, RALGPS1                                                                                                                                                                                                                                                                                                                                                                                                                |
| 11 | 99381647  | 99591279  | 209633  | 2  | C11H9orf114, ENDOG, LOC101908339, LOC104973489, PKN3, SET, SPTAN1, TBC1D13, WDR34, ZDHHC12, ZER1                                                                                                                                                                                                                                                                                                                                        |
| 11 | 99591279  | 99611209  | 19931   | 2  | C11H9orf114, CCBL1                                                                                                                                                                                                                                                                                                                                                                                                                      |
| 12 | 735504    | 907553    | 172050  | 3  | .                                                                                                                                                                                                                                                                                                                                                                                                                                       |
| 12 | 907553    | 941221    | 33669   | 2  | .                                                                                                                                                                                                                                                                                                                                                                                                                                       |
| 12 | 941221    | 1034660   | 93440   | 3  | .                                                                                                                                                                                                                                                                                                                                                                                                                                       |
| 12 | 1034660   | 1332026   | 297367  | 2  | LOC540096                                                                                                                                                                                                                                                                                                                                                                                                                               |
| 12 | 1332026   | 1556918   | 224893  | 5  | TDRD3                                                                                                                                                                                                                                                                                                                                                                                                                                   |
| 12 | 1556918   | 1839307   | 282390  | 14 | LOC104973528, TDRD3                                                                                                                                                                                                                                                                                                                                                                                                                     |
| 12 | 1839307   | 1877866   | 38560   | 12 | .                                                                                                                                                                                                                                                                                                                                                                                                                                       |
| 12 | 1877866   | 1903851   | 25986   | 11 | LOC100140262                                                                                                                                                                                                                                                                                                                                                                                                                            |
| 12 | 1903851   | 2887203   | 983353  | 7  | DIAPH3, LOC100140262, LOC104973529, LOC789865                                                                                                                                                                                                                                                                                                                                                                                           |
| 12 | 3856446   | 4304312   | 447867  | 4  | .                                                                                                                                                                                                                                                                                                                                                                                                                                       |
| 12 | 4304312   | 4321010   | 16699   | 6  | .                                                                                                                                                                                                                                                                                                                                                                                                                                       |
| 12 | 4321010   | 4566741   | 245732  | 6  | .                                                                                                                                                                                                                                                                                                                                                                                                                                       |
| 12 | 4566741   | 4782788   | 216048  | 6  | .                                                                                                                                                                                                                                                                                                                                                                                                                                       |
| 12 | 6183477   | 6390654   | 207178  | 5  | .                                                                                                                                                                                                                                                                                                                                                                                                                                       |
| 12 | 6390654   | 6621592   | 230939  | 2  | .                                                                                                                                                                                                                                                                                                                                                                                                                                       |
| 12 | 6621592   | 7891018   | 1269427 | 2  | LOC100141157                                                                                                                                                                                                                                                                                                                                                                                                                            |
| 12 | 7920825   | 8051329   | 130505  | 5  | .                                                                                                                                                                                                                                                                                                                                                                                                                                       |
| 12 | 8051329   | 8527084   | 475756  | 4  | .                                                                                                                                                                                                                                                                                                                                                                                                                                       |
| 12 | 8527084   | 8540293   | 13210   | 2  | .                                                                                                                                                                                                                                                                                                                                                                                                                                       |
| 12 | 17456211  | 18152802  | 696592  | 2  | LOC104973549, LOC107132977, LOC783657, MED4, NUDT15, SUCLA2                                                                                                                                                                                                                                                                                                                                                                             |

|    |          |          |         |    |                                                                                                                                                                                                                        |
|----|----------|----------|---------|----|------------------------------------------------------------------------------------------------------------------------------------------------------------------------------------------------------------------------|
| 12 | 18152802 | 18429320 | 276519  | 3  | ITM2B, LOC101903713, LOC506251, LPAR6, RB1, RCBTB2, TRNAE-UUC                                                                                                                                                          |
| 12 | 18429320 | 18738807 | 309488  | 2  | CYSLTR2, LOC101903925                                                                                                                                                                                                  |
| 12 | 23594944 | 23932617 | 337674  | 3  | UFM1                                                                                                                                                                                                                   |
| 12 | 37898367 | 37924877 | 26511   | 2  | .                                                                                                                                                                                                                      |
| 12 | 37924877 | 38461763 | 536887  | 2  | LOC100296100                                                                                                                                                                                                           |
| 12 | 40007229 | 40521012 | 513784  | 2  | PCDH9                                                                                                                                                                                                                  |
| 12 | 50144781 | 50291271 | 146491  | 2  | .                                                                                                                                                                                                                      |
| 12 | 50291271 | 50508384 | 217114  | 3  | .                                                                                                                                                                                                                      |
| 12 | 60696090 | 60980279 | 284190  | 2  | LOC104973615                                                                                                                                                                                                           |
| 12 | 60980279 | 61520260 | 539982  | 2  | SLITRK6, TRNAC-GCA                                                                                                                                                                                                     |
| 12 | 61520260 | 62400058 | 879799  | 2  | LOC100139019, LOC781157                                                                                                                                                                                                |
| 12 | 62400058 | 62903304 | 503247  | 10 | SLITRK5                                                                                                                                                                                                                |
| 12 | 62903304 | 63064239 | 160936  | 6  | .                                                                                                                                                                                                                      |
| 12 | 63064239 | 63420912 | 356674  | 8  | LOC107133002                                                                                                                                                                                                           |
| 12 | 63420912 | 63668217 | 247306  | 9  | .                                                                                                                                                                                                                      |
| 12 | 63668217 | 63770247 | 102031  | 7  | .                                                                                                                                                                                                                      |
| 12 | 63770247 | 64927326 | 1157080 | 2  | LOC107133003, LOC616944                                                                                                                                                                                                |
| 12 | 64927326 | 65090750 | 163425  | 6  | .                                                                                                                                                                                                                      |
| 12 | 65090750 | 65183055 | 92306   | 6  | .                                                                                                                                                                                                                      |
| 12 | 65183055 | 65383845 | 200791  | 4  | .                                                                                                                                                                                                                      |
| 12 | 65383845 | 65513040 | 129196  | 5  | LOC101907749                                                                                                                                                                                                           |
| 12 | 66991721 | 67739127 | 747407  | 7  | GPC5                                                                                                                                                                                                                   |
| 12 | 67739127 | 68297800 | 558674  | 2  | LOC101902424, LOC104970044, LOC104973623                                                                                                                                                                               |
| 12 | 70686914 | 71095315 | 408402  | 6  | LOC101903142, LOC101903219, LOC104973632, LOC107131272, LOC107133005, LOC784305                                                                                                                                        |
| 12 | 71095315 | 71271064 | 175750  | 3  | LOC100336232, LOC100848652, LOC101902253, LOC101903219, LOC510333                                                                                                                                                      |
| 12 | 71271064 | 71506447 | 235384  | 2  | LOC100336232, LOC100848700, LOC101902419, LOC107133006                                                                                                                                                                 |
| 12 | 72560494 | 72588022 | 27529   | 2  | LOC100337069                                                                                                                                                                                                           |
| 12 | 72588022 | 72700406 | 112385  | 2  | LOC100337069, LOC101902505                                                                                                                                                                                             |
| 12 | 77246683 | 77829502 | 582820  | 5  | DNAJC3, DZIP1, HS6ST3, LOC785064, UGGT2                                                                                                                                                                                |
| 12 | 77829502 | 78177583 | 348082  | 13 | HS6ST3, TRNAG-CCC                                                                                                                                                                                                      |
| 12 | 78177583 | 78301251 | 123669  | 7  | HS6ST3                                                                                                                                                                                                                 |
| 12 | 78301251 | 78452482 | 151232  | 9  | HS6ST3, LOC107133014, LOC782740                                                                                                                                                                                        |
| 12 | 78452482 | 78851744 | 399263  | 5  | LOC107133015, MBNL2, OXGR1, TRNAC-GCA                                                                                                                                                                                  |
| 12 | 78851744 | 79078553 | 226810  | 9  | LOC104973647, RAP2A                                                                                                                                                                                                    |
| 12 | 79078553 | 79333664 | 255112  | 8  | .                                                                                                                                                                                                                      |
| 12 | 80648029 | 80662845 | 14817   | 2  | .                                                                                                                                                                                                                      |
| 12 | 80662845 | 81576880 | 914036  | 5  | CLYBL, GGACT, LOC100140038, LOC101905905, LOC101906778, LOC104973656, LOC107133016, LOC787451, MIR2285N-1, PCCA, TM9SF2, TRNAG-ACC, TRNAG-CCC, ZIC2                                                                    |
| 12 | 81576880 | 81733302 | 156423  | 8  | LOC100848638, MIR2892, TMTC4                                                                                                                                                                                           |
| 12 | 83234978 | 83453920 | 218943  | 2  | BIVM, KDELC1, LOC101906350, LOC101906427, LOC104973658, METTL21C, TEX30, TPP2                                                                                                                                          |
| 13 | 71       | 167957   | 167887  | 11 | LOC101906171, LOC104968831, LOC107133020, LOC616519                                                                                                                                                                    |
| 13 | 167957   | 192608   | 24652   | 9  | LOC107133020, LOC788047                                                                                                                                                                                                |
| 13 | 192608   | 258305   | 65698   | 7  | LOC100298428, LOC788064                                                                                                                                                                                                |
| 13 | 258305   | 289652   | 31348   | 5  | LOC100298428, LOC101909256                                                                                                                                                                                             |
| 13 | 289652   | 352165   | 62514   | 6  | LOC100296695, LOC788089, LOC788106                                                                                                                                                                                     |
| 13 | 352165   | 506060   | 153896  | 9  | LOC788120                                                                                                                                                                                                              |
| 13 | 506060   | 728955   | 222896  | 3  | TMX4                                                                                                                                                                                                                   |
| 13 | 728955   | 869152   | 140198  | 4  | PLCB1                                                                                                                                                                                                                  |
| 13 | 869152   | 1039007  | 169856  | 4  | PLCB1                                                                                                                                                                                                                  |
| 13 | 1213727  | 1292999  | 79273   | 2  | PLCB1                                                                                                                                                                                                                  |
| 13 | 1292999  | 1511344  | 218346  | 3  | MIR2285M-1, PLCB1                                                                                                                                                                                                      |
| 13 | 1511344  | 2199763  | 688420  | 2  | LOC107133021, PLCB1                                                                                                                                                                                                    |
| 13 | 2199763  | 2415434  | 215672  | 4  | PLCB4                                                                                                                                                                                                                  |
| 13 | 2415434  | 2577850  | 162417  | 3  | LAMP5, MGC148692, PAK7, PLCB4                                                                                                                                                                                          |
| 13 | 3907070  | 4819405  | 912336  | 2  | LOC101901915, LOC104973695                                                                                                                                                                                             |
| 13 | 7243912  | 7495673  | 251762  | 5  | ESF1, TASP1                                                                                                                                                                                                            |
| 13 | 7495673  | 8239622  | 743950  | 4  | ESF1, FLRT3, LOC104973699, MACROD2, NDUFAF5, SEL1L2                                                                                                                                                                    |
| 13 | 8239622  | 8436068  | 196447  | 3  | MACROD2                                                                                                                                                                                                                |
| 13 | 13955780 | 14115557 | 159778  | 3  | .                                                                                                                                                                                                                      |
| 13 | 14115557 | 14304689 | 189133  | 4  | .                                                                                                                                                                                                                      |
| 13 | 14304689 | 14682257 | 377569  | 2  | .                                                                                                                                                                                                                      |
| 13 | 17033465 | 17766303 | 732839  | 2  | FBXO18, IL15RA, IL2RA, LOC101904563, LOC101904996, LOC104973718, LOC104973720, PFKFB3, PRKCQ, RBM17, TRNAF-GAA                                                                                                         |
| 13 | 17766303 | 17879515 | 113213  | 2  | LOC101909551, LOC513969, LOC615768, LOC619000                                                                                                                                                                          |
| 13 | 17879515 | 17942101 | 62587   | 2  | LOC101903895, LOC101904138, LOC104968423, LOC522845                                                                                                                                                                    |
| 13 | 17942101 | 18138448 | 196348  | 3  | ACBD5, ANKRD26, LOC101902607, LOC104973722, LOC782950, MASTL, YME1L1                                                                                                                                                   |
| 13 | 18138448 | 18154688 | 16241   | 2  | .                                                                                                                                                                                                                      |
| 13 | 18154688 | 18167166 | 12479   | 2  | .                                                                                                                                                                                                                      |
| 13 | 39611279 | 40351058 | 739780  | 3  | CFAP61, CRNKL1, LOC101905046, LOC101905154, LOC530211, MIR2305, NAA20, RIN2, SLC24A3                                                                                                                                   |
| 13 | 41586589 | 41981780 | 395192  | 3  | .                                                                                                                                                                                                                      |
| 13 | 44669372 | 44773729 | 104358  | 4  | .                                                                                                                                                                                                                      |
| 13 | 46695895 | 48280994 | 1585100 | 3  | ADARB2, CDS2, DIP2C, GTPBP4, IDI1, LARP4B, LOC101904942, LOC101905075, LOC101905155, LOC107133051, LOC107133053, LOC787679, LOC787698, MIR2285M-2, PCNA, PRND, PRNP, PROKR2, RASSF2, SLC23A2, TMMEM230, WDR37, ZMYND11 |
| 13 | 49991135 | 50171444 | 180310  | 2  | .                                                                                                                                                                                                                      |
| 13 | 52034362 | 52372503 | 338142  | 8  | ADAM33, AP5S1, ATRN, C13H20orf27, CDC25B, CENPB, GFRA4, HSPA12B, LOC104976448, LOC507743, SIGLEC1, SPEF1                                                                                                               |
| 13 | 52372503 | 53090397 | 717895  | 10 | ATRN, AVP, C13H20orf141, C13H20orf194, CPXM1, DDRGK1, FASTKD5, GNRH2, ITPA, LOC101903899, LOC104973820, MRPS26, OXT, PCED1A, PROSAP1P1, PTPRA, SLC4A11, TMMEM239, UBOX5, VPS16                                         |
| 13 | 53090397 | 53292643 | 202247  | 8  | EBF4, IDH3B, LOC101902712, LOC101904587, NOP56, TMC2                                                                                                                                                                   |

|    |          |          |         |    |                                                                                                                                                                                                                                                                                                                                                                                                                                                                                                                                                                                                                                                                                                                                                                                                                                                     |
|----|----------|----------|---------|----|-----------------------------------------------------------------------------------------------------------------------------------------------------------------------------------------------------------------------------------------------------------------------------------------------------------------------------------------------------------------------------------------------------------------------------------------------------------------------------------------------------------------------------------------------------------------------------------------------------------------------------------------------------------------------------------------------------------------------------------------------------------------------------------------------------------------------------------------------------|
| 13 | 53292643 | 55800220 | 2507578 | 4  | ABHD16B, ADRM1, ARFGAP1, ARFRP1, BHLHE23, BIRC7, C13H20orf195, CABLES2, CHRNA4, COL20A1, COL9A3, DIDO1, DNAJC5, EEF1A2, GATA5, GID8, GINS1, GMEB2, HRH3, KCNQ2, LAMA5, LIME1, LKAAEAR1, LOC100847256, LOC100848770, LOC101902869, LOC101904896, LOC101905484, LOC104973823, LOC104973824, LOC104973826, LOC104973827, LOC104973829, LOC104973830, LOC107131125, LOC107133055, LOC107133069, LOC107133070, LOC536097, LOC615706, LOC786039, LOC786845, LOC789034, LSM14B, MIR1-1, MIR124B, MIR133A-1, MIR133C, MIR138B, MIR2306, MRGBP, MTG2, MYT1, NPBWR2, NTSR1, OGFR, OPRL1, OSBPL2, PCMTD2, PDYN, PDPDF, PRPF6, PSMAT, PTK6, RBBP8NL, RGS19, RPS21, RTEL1, SAMD10, SIRPA, SIRPB1, SLC17A9, SLC2A4RG, SLC04A1, SNRPB, SOX18, SRMS, SS18L1, STK35, STMN3, TCEA2, TCFL5, TGM3, TGM6, TMC2, TNFRSF6B, TPD52L2, UCKL1, YTHDF1, ZBTB46, ZGPAT, ZNF512B |
| 13 | 55800220 | 55950654 | 150435  | 10 | CDH4, LOC101906818, TAF4, TRNAW-CCA                                                                                                                                                                                                                                                                                                                                                                                                                                                                                                                                                                                                                                                                                                                                                                                                                 |
| 13 | 56518267 | 56858000 | 339734  | 2  | .                                                                                                                                                                                                                                                                                                                                                                                                                                                                                                                                                                                                                                                                                                                                                                                                                                                   |
| 13 | 63271803 | 63309494 | 37692   | 6  | BPIFA2A                                                                                                                                                                                                                                                                                                                                                                                                                                                                                                                                                                                                                                                                                                                                                                                                                                             |
| 13 | 63309494 | 63741640 | 432147  | 8  | BPIFA1, BPIFA2B, BPIFA2C, BPIFA2D, BPIFA3, BPIFA4, BPIFB1, BPIFB5, CDK5RAP1, LOC100848568, LOC101906405, LOC101908058, LOC107133057, LOC107133078, SNTA1, TRNAG-CCC                                                                                                                                                                                                                                                                                                                                                                                                                                                                                                                                                                                                                                                                                 |
| 13 | 63741640 | 64078829 | 337190  | 23 | ACTL10, C13H20orf144, CBFA2T2, CHMP4B, E2F1, LOC101901940, LOC785968, NECAB3, PXMP4, SNTA1, TRNAC-GCA, ZNF341                                                                                                                                                                                                                                                                                                                                                                                                                                                                                                                                                                                                                                                                                                                                       |
| 13 | 64078829 | 64377115 | 298287  | 27 | CHMP4B, EIF2S2, RALY                                                                                                                                                                                                                                                                                                                                                                                                                                                                                                                                                                                                                                                                                                                                                                                                                                |
| 13 | 64377115 | 64401804 | 24690   | 29 | .                                                                                                                                                                                                                                                                                                                                                                                                                                                                                                                                                                                                                                                                                                                                                                                                                                                   |
| 13 | 64401804 | 64475104 | 73301   | 31 | .                                                                                                                                                                                                                                                                                                                                                                                                                                                                                                                                                                                                                                                                                                                                                                                                                                                   |
| 13 | 64475104 | 64640895 | 165792  | 26 | AHCY, ASIP, ITCH, LOC782136, TRNAG-CCC                                                                                                                                                                                                                                                                                                                                                                                                                                                                                                                                                                                                                                                                                                                                                                                                              |
| 13 | 64640895 | 66868834 | 2227940 | 9  | AAR2, ACS2, C13H20orf173, C13H20orf24, CEP250, CNBD2, CPNE1, DLGAP4, DYNLRB1, EDEM2, EIF6, EPB41L1, ERGIC3, FAM83C, GDF5, GGT7, GSS, ITCH, LOC100295994, LOC101903101, LOC101903639, LOC101905432, LOC104973867, LOC104973870, LOC526745, LOC533073, LOC786401, LOC788449, MAP1LC3A, MIR499, MMP24, MYH7B, MYL9, NCOA6, NDRG3, NFS1, PHF20, PIGU, PROCR, RBL1, RBM12, RBM39, ROMO1, SAMHD1, SCAND1, SLA2, SPAG4, TGIF2, TLDC2, TP53INP2, TRNAC-GCA, TRNAE-UUC, TRNAG-CCC, TRNAM-CAU, TRPC4AP, UQC                                                                                                                                                                                                                                                                                                                                                   |
| 13 | 66868834 | 67601611 | 732778  | 3  | BLCAP, CTNBL1, DSN1, GHRH, LOC100849067, LOC104973872, LOC104973873, LOC107133079, LOC107133080, LOC614284, MANBAL, MROH8, NNAT, RBL1, RPN2, SOGA1, SRC                                                                                                                                                                                                                                                                                                                                                                                                                                                                                                                                                                                                                                                                                             |
| 13 | 70311992 | 70422096 | 110105  | 3  | LOC101907117, MAFB                                                                                                                                                                                                                                                                                                                                                                                                                                                                                                                                                                                                                                                                                                                                                                                                                                  |
| 13 | 74260971 | 74933957 | 672987  | 3  | DBNDD2, ELP, KCNS1, LOC100196900, LOC100295842, LOC100850808, LOC101903403, LOC101903858, LOC104973891, LOC107133082, LOC404105, LOC407163, LOC512548, LOC512838, LOC783797, MATN4, PABPC1L, PI3, PIGT, RBPJL, SDC4, SLPI, STK4, SYS1, TOMM34, TP53TG5, WFDC15B, WFDC5, YWHAB                                                                                                                                                                                                                                                                                                                                                                                                                                                                                                                                                                       |
| 13 | 75241799 | 75278915 | 37117   | 3  | LOC104973892, LOC404061, LOC404103                                                                                                                                                                                                                                                                                                                                                                                                                                                                                                                                                                                                                                                                                                                                                                                                                  |
| 13 | 75278915 | 75308339 | 29425   | 2  | LOC104973892, LOC404061                                                                                                                                                                                                                                                                                                                                                                                                                                                                                                                                                                                                                                                                                                                                                                                                                             |
| 13 | 82576712 | 82637270 | 60559   | 2  | LOC104973930                                                                                                                                                                                                                                                                                                                                                                                                                                                                                                                                                                                                                                                                                                                                                                                                                                        |
| 13 | 82637270 | 82657685 | 20416   | 2  | .                                                                                                                                                                                                                                                                                                                                                                                                                                                                                                                                                                                                                                                                                                                                                                                                                                                   |
| 13 | 82657685 | 83072565 | 414881  | 2  | CYP24A1, DOK5, PFDN4, TRNAL-UAA                                                                                                                                                                                                                                                                                                                                                                                                                                                                                                                                                                                                                                                                                                                                                                                                                     |
| 13 | 83072565 | 83172837 | 100273  | 7  | DOK5                                                                                                                                                                                                                                                                                                                                                                                                                                                                                                                                                                                                                                                                                                                                                                                                                                                |
| 13 | 83172837 | 83416894 | 244058  | 8  | LOC101903665                                                                                                                                                                                                                                                                                                                                                                                                                                                                                                                                                                                                                                                                                                                                                                                                                                        |
| 13 | 83416894 | 83553734 | 136841  | 12 | .                                                                                                                                                                                                                                                                                                                                                                                                                                                                                                                                                                                                                                                                                                                                                                                                                                                   |
| 13 | 83553734 | 83682043 | 128310  | 11 | .                                                                                                                                                                                                                                                                                                                                                                                                                                                                                                                                                                                                                                                                                                                                                                                                                                                   |
| 13 | 83682043 | 83708467 | 26425   | 12 | .                                                                                                                                                                                                                                                                                                                                                                                                                                                                                                                                                                                                                                                                                                                                                                                                                                                   |
| 13 | 83708467 | 84589399 | 880933  | 12 | CBLN4, LOC100298309, LOC107133062, TRNAC-GCA, TRNAG-GCC                                                                                                                                                                                                                                                                                                                                                                                                                                                                                                                                                                                                                                                                                                                                                                                             |
| 14 | 6427039  | 7069301  | 642263  | 2  | .                                                                                                                                                                                                                                                                                                                                                                                                                                                                                                                                                                                                                                                                                                                                                                                                                                                   |
| 14 | 7069301  | 7253159  | 183859  | 3  | .                                                                                                                                                                                                                                                                                                                                                                                                                                                                                                                                                                                                                                                                                                                                                                                                                                                   |
| 14 | 19252740 | 19367880 | 115141  | 2  | .                                                                                                                                                                                                                                                                                                                                                                                                                                                                                                                                                                                                                                                                                                                                                                                                                                                   |
| 14 | 19367880 | 19455245 | 87366   | 3  | LOC100139328                                                                                                                                                                                                                                                                                                                                                                                                                                                                                                                                                                                                                                                                                                                                                                                                                                        |
| 14 | 19470387 | 19556574 | 86188   | 2  | LOC100139328                                                                                                                                                                                                                                                                                                                                                                                                                                                                                                                                                                                                                                                                                                                                                                                                                                        |
| 14 | 19556574 | 20078786 | 522213  | 3  | HAS2, LOC107133107, LOC515601, LOC522769                                                                                                                                                                                                                                                                                                                                                                                                                                                                                                                                                                                                                                                                                                                                                                                                            |
| 14 | 20078786 | 20230111 | 151326  | 6  | .                                                                                                                                                                                                                                                                                                                                                                                                                                                                                                                                                                                                                                                                                                                                                                                                                                                   |
| 14 | 20230111 | 20377777 | 147667  | 5  | TRNAM-CAU                                                                                                                                                                                                                                                                                                                                                                                                                                                                                                                                                                                                                                                                                                                                                                                                                                           |
| 14 | 20377777 | 20987889 | 610113  | 2  | CEBPD, LOC100297500, LOC100847223, LOC101902180, LOC529047, SPIDR                                                                                                                                                                                                                                                                                                                                                                                                                                                                                                                                                                                                                                                                                                                                                                                   |
| 14 | 20987889 | 21337809 | 349921  | 3  | H3F3C, LOC107133112, MCM4, PRKDC, SPIDR                                                                                                                                                                                                                                                                                                                                                                                                                                                                                                                                                                                                                                                                                                                                                                                                             |
| 14 | 21337809 | 21549635 | 211827  | 2  | LOC100139903, MCM4, UBE2V2                                                                                                                                                                                                                                                                                                                                                                                                                                                                                                                                                                                                                                                                                                                                                                                                                          |
| 14 | 22735944 | 23478178 | 742235  | 4  | FAM150A, LOC100141260, LOC101906226, LOC101906592, LOC104974017, LOC104974020, NPBWR1, PCMTD1, RB1CC1, ST18                                                                                                                                                                                                                                                                                                                                                                                                                                                                                                                                                                                                                                                                                                                                         |
| 14 | 23478178 | 23872616 | 394439  | 3  | ATP6V1H, LYPLA1, MRPL15, OPRK1, RGS20, TCEA1                                                                                                                                                                                                                                                                                                                                                                                                                                                                                                                                                                                                                                                                                                                                                                                                        |
| 14 | 25309184 | 25350724 | 41541   | 2  | SDR16C6                                                                                                                                                                                                                                                                                                                                                                                                                                                                                                                                                                                                                                                                                                                                                                                                                                             |
| 14 | 25350724 | 25413115 | 62392   | 2  | LOC101907667, PENK, SDR16C6                                                                                                                                                                                                                                                                                                                                                                                                                                                                                                                                                                                                                                                                                                                                                                                                                         |
| 14 | 25413115 | 25568995 | 155881  | 4  | LOC101907667                                                                                                                                                                                                                                                                                                                                                                                                                                                                                                                                                                                                                                                                                                                                                                                                                                        |
| 14 | 25568995 | 25755179 | 186185  | 3  | IMPAD1, LOC101907667                                                                                                                                                                                                                                                                                                                                                                                                                                                                                                                                                                                                                                                                                                                                                                                                                                |
| 14 | 25857221 | 25879266 | 22046   | 2  | .                                                                                                                                                                                                                                                                                                                                                                                                                                                                                                                                                                                                                                                                                                                                                                                                                                                   |
| 14 | 25879266 | 25978896 | 99631   | 2  | .                                                                                                                                                                                                                                                                                                                                                                                                                                                                                                                                                                                                                                                                                                                                                                                                                                                   |
| 14 | 32716034 | 33078652 | 362619  | 2  | ADHFE1, C14H8orf46, MYBL1, RRS1, ZSCAN5B                                                                                                                                                                                                                                                                                                                                                                                                                                                                                                                                                                                                                                                                                                                                                                                                            |
| 14 | 33078652 | 33359502 | 280851  | 2  | LOC100847363, LOC104974037, LOC784087, MCMDC2, MYBL1, SGK3, VCP1P1                                                                                                                                                                                                                                                                                                                                                                                                                                                                                                                                                                                                                                                                                                                                                                                  |
| 14 | 33359502 | 33674740 | 315239  | 4  | ARFGEF1, COPS5, CSPP1, PPP1R42, TCF24                                                                                                                                                                                                                                                                                                                                                                                                                                                                                                                                                                                                                                                                                                                                                                                                               |
| 14 | 33674740 | 33894668 | 219929  | 2  | ARFGEF1, CPA6, LOC101902584, TRNAC-GCA                                                                                                                                                                                                                                                                                                                                                                                                                                                                                                                                                                                                                                                                                                                                                                                                              |
| 14 | 45386678 | 45595383 | 208706  | 2  | LOC100847158, MRPS28                                                                                                                                                                                                                                                                                                                                                                                                                                                                                                                                                                                                                                                                                                                                                                                                                                |
| 14 | 54779793 | 55485770 | 705978  | 2  | .                                                                                                                                                                                                                                                                                                                                                                                                                                                                                                                                                                                                                                                                                                                                                                                                                                                   |
| 14 | 56000432 | 56479255 | 478824  | 5  | LOC104974084                                                                                                                                                                                                                                                                                                                                                                                                                                                                                                                                                                                                                                                                                                                                                                                                                                        |
| 14 | 56479255 | 56704593 | 225339  | 2  | .                                                                                                                                                                                                                                                                                                                                                                                                                                                                                                                                                                                                                                                                                                                                                                                                                                                   |
| 14 | 57413080 | 57714035 | 300956  | 2  | ENY2, NUDCD1, PKHD1L1                                                                                                                                                                                                                                                                                                                                                                                                                                                                                                                                                                                                                                                                                                                                                                                                                               |
| 14 | 57714035 | 57880030 | 165996  | 5  | LOC104974087, TRHR                                                                                                                                                                                                                                                                                                                                                                                                                                                                                                                                                                                                                                                                                                                                                                                                                                  |
| 14 | 57880030 | 57929158 | 49129   | 3  | LOC104974087                                                                                                                                                                                                                                                                                                                                                                                                                                                                                                                                                                                                                                                                                                                                                                                                                                        |
| 14 | 57929158 | 57939603 | 10446   | 2  | .                                                                                                                                                                                                                                                                                                                                                                                                                                                                                                                                                                                                                                                                                                                                                                                                                                                   |
| 14 | 57939603 | 58003049 | 63447   | 2  | .                                                                                                                                                                                                                                                                                                                                                                                                                                                                                                                                                                                                                                                                                                                                                                                                                                                   |
| 14 | 58003049 | 58636410 | 633362  | 6  | EMC2, LOC101905702, TMEM74                                                                                                                                                                                                                                                                                                                                                                                                                                                                                                                                                                                                                                                                                                                                                                                                                          |
| 14 | 58636410 | 59312867 | 676458  | 5  | EIF3E, LOC104974091, LOC511981, RSPO2                                                                                                                                                                                                                                                                                                                                                                                                                                                                                                                                                                                                                                                                                                                                                                                                               |

|    |          |          |         |    |                                                                                                                                                                                                         |
|----|----------|----------|---------|----|---------------------------------------------------------------------------------------------------------------------------------------------------------------------------------------------------------|
| 14 | 59312867 | 59330440 | 17574   | 4  | .                                                                                                                                                                                                       |
| 14 | 59330440 | 59658987 | 328548  | 4  | ANGPT1, LOC614209                                                                                                                                                                                       |
| 14 | 59658987 | 59722201 | 63215   | 4  | ANGPT1                                                                                                                                                                                                  |
| 14 | 59722201 | 60225049 | 502849  | 3  | ANGPT1, LOC104974093, LOC782496                                                                                                                                                                         |
| 14 | 60225049 | 60465778 | 240730  | 7  | ABRA, LOC100141107, LOC104974093, OXR1                                                                                                                                                                  |
| 14 | 60465778 | 60641238 | 175461  | 5  | OXR1                                                                                                                                                                                                    |
| 14 | 60641238 | 60848518 | 207281  | 5  | OXR1                                                                                                                                                                                                    |
| 14 | 60848518 | 61169916 | 321399  | 3  | OXR1                                                                                                                                                                                                    |
| 14 | 61169916 | 61197795 | 27880   | 4  | .                                                                                                                                                                                                       |
| 14 | 61197795 | 61290348 | 92554   | 5  | .                                                                                                                                                                                                       |
| 14 | 61290348 | 61304555 | 14208   | 6  | .                                                                                                                                                                                                       |
| 14 | 61304555 | 61364287 | 59733   | 5  | LOC107133124, ZFPM2                                                                                                                                                                                     |
| 14 | 61364287 | 61888437 | 524151  | 5  | LOC104974098, LOC107133124, ZFPM2                                                                                                                                                                       |
| 14 | 61888437 | 61970947 | 82511   | 5  | .                                                                                                                                                                                                       |
| 14 | 61970947 | 62247363 | 276417  | 2  | .                                                                                                                                                                                                       |
| 14 | 64133806 | 64900188 | 766383  | 2  | KLF10, LOC104974106, LOC104974107, LOC107133128, LOC107133129, ODF1, RRM2B, TRNAE-UUC, UBR5                                                                                                             |
| 14 | 65664946 | 65831750 | 166805  | 2  | ZNF706                                                                                                                                                                                                  |
| 14 | 65831750 | 66112562 | 280813  | 3  | LOC101905128, LOC101907120, YWHAZ                                                                                                                                                                       |
| 14 | 66112562 | 66439028 | 326467  | 3  | ANKRD46, LOC104974111, PABPC1, SNX31, TRNAC-GCA, TRNAY-AUA                                                                                                                                              |
| 14 | 66439028 | 66964190 | 525163  | 5  | FBXO43, LOC104972815, POLR2K, RGS22, RNF19A, SPAG1                                                                                                                                                      |
| 14 | 66964190 | 67123787 | 159598  | 7  | MGC148714, VPS13B                                                                                                                                                                                       |
| 14 | 67123787 | 67148445 | 24659   | 6  | VPS13B                                                                                                                                                                                                  |
| 14 | 67148445 | 67222961 | 74517   | 4  | VPS13B                                                                                                                                                                                                  |
| 14 | 67222961 | 68480690 | 1257730 | 2  | KCNS2, LOC100298420, LOC104974113, LOC104974115, LOC107133130, MIR599, MIR875, OSR2, STK3, TRNAG-UCC, VPS13B                                                                                            |
| 14 | 68480690 | 68493869 | 13180   | 3  | LOC100298420                                                                                                                                                                                            |
| 14 | 68493869 | 68883420 | 389552  | 4  | ERICH5, LOC100298420, MATN2, NIPAL2, POP1, RIDA, RPL30                                                                                                                                                  |
| 14 | 68883420 | 68959967 | 76548   | 3  | MATN2                                                                                                                                                                                                   |
| 14 | 68959967 | 69398336 | 438370  | 2  | LAPTM4B, LOC104974118, LOC782052, MATN2, MTDH                                                                                                                                                           |
| 14 | 69398336 | 69595652 | 197317  | 3  | TSPYL5                                                                                                                                                                                                  |
| 14 | 71322882 | 71714765 | 391884  | 2  | .                                                                                                                                                                                                       |
| 14 | 72905561 | 73185960 | 280400  | 5  | LOC104974129, PDP1, TMEM67                                                                                                                                                                              |
| 14 | 73185960 | 73417045 | 231086  | 6  | FAM92A1, LOC107133136, RBM12B                                                                                                                                                                           |
| 14 | 76643509 | 77788779 | 1145271 | 2  | LOC104974150, LOC107131287, LOC783798, LOC786994, MMP16                                                                                                                                                 |
| 14 | 77788779 | 77857468 | 68690   | 3  | .                                                                                                                                                                                                       |
| 14 | 77857468 | 77968489 | 111022  | 3  | .                                                                                                                                                                                                       |
| 14 | 78404054 | 78470889 | 66836   | 4  | CNBD1                                                                                                                                                                                                   |
| 14 | 78470889 | 78713978 | 243090  | 6  | CNBD1                                                                                                                                                                                                   |
| 14 | 78713978 | 78902767 | 188790  | 7  | CNGB3, CPNE3                                                                                                                                                                                            |
| 14 | 78902767 | 79047749 | 144983  | 14 | RMDN1, WWP1                                                                                                                                                                                             |
| 14 | 79047749 | 79106527 | 58779   | 12 | LOC104974135, WWP1                                                                                                                                                                                      |
| 14 | 79106527 | 80211641 | 1105115 | 5  | ATP6V0D2, C14Horf59, CA1, CA13, CA2, CA3, E2F5, LOC100138079, LOC100196897, LOC100847874, LOC101903860, LOC104974136, LOC104974137, LOC107133131, LOC784254, LRRCC1, MIR2311, PSKH2, SLC7A13, TRNAS-GGA |
| 14 | 80211641 | 80386978 | 175338  | 8  | LOC107133132, LOC506670, LOC518422, LOC787733, RALYL                                                                                                                                                    |
| 14 | 80386978 | 80643048 | 256071  | 8  | RALYL                                                                                                                                                                                                   |
| 14 | 80643048 | 80876286 | 233239  | 6  | RALYL                                                                                                                                                                                                   |
| 14 | 80876286 | 81384919 | 508634  | 5  | LOC616400, RALYL                                                                                                                                                                                        |
| 14 | 81384919 | 81498694 | 113776  | 3  | .                                                                                                                                                                                                       |
| 14 | 81498694 | 81523448 | 24755   | 2  | .                                                                                                                                                                                                       |
| 14 | 82008361 | 82037031 | 28671   | 3  | .                                                                                                                                                                                                       |
| 14 | 82037031 | 82209556 | 172526  | 4  | .                                                                                                                                                                                                       |
| 14 | 82450651 | 82700671 | 250021  | 2  | .                                                                                                                                                                                                       |
| 14 | 83058713 | 83075571 | 16859   | 4  | .                                                                                                                                                                                                       |
| 14 | 83075571 | 83125396 | 49826   | 8  | .                                                                                                                                                                                                       |
| 14 | 83125396 | 83255189 | 129794  | 10 | LOC107133137, LOC784458                                                                                                                                                                                 |
| 14 | 83255189 | 83280976 | 25788   | 11 | .                                                                                                                                                                                                       |
| 14 | 83280976 | 83389009 | 108034  | 12 | .                                                                                                                                                                                                       |
| 14 | 83389009 | 84030913 | 641905  | 10 | CHMP4C, DEPTOR, DSCC1, ENPP2, IMPA1, LOC100335514, LOC104974144, LOC107133138, LOC107133139, MIR2285N-6, SLC10A5, SNX16, TAF2, ZFAND1                                                                   |
| 14 | 84030913 | 84196275 | 165363  | 8  | DEPTOR                                                                                                                                                                                                  |
| 14 | 84196275 | 85007025 | 810751  | 2  | COL14A1, LOC104974149, LOC107133140, LOC107133141, MRPL13, MTBP, SNTB1                                                                                                                                  |
| 15 | 14636    | 163292   | 148657  | 8  | LOC104974152                                                                                                                                                                                            |
| 15 | 163292   | 189786   | 26495   | 7  | LOC104974153                                                                                                                                                                                            |
| 15 | 189786   | 233002   | 43217   | 7  | LOC101909994, LOC509895, LOC784899                                                                                                                                                                      |
| 15 | 233002   | 247904   | 14903   | 7  | LOC784899                                                                                                                                                                                               |
| 15 | 247904   | 290646   | 42743   | 6  | LOC100299084, LOC530292, LOC781133                                                                                                                                                                      |
| 15 | 290646   | 542306   | 251661  | 4  | LOC107133142, LOC518869, LOC526715, LOC781246, LOC781264, LOC781286, LOC781326, LOC781366, LOC781406, LOC781447, LOC781518, LOC781636                                                                   |
| 15 | 542306   | 700993   | 158688  | 2  | LOC781245, LOC781285, LOC781325, LOC790589, OR9G1                                                                                                                                                       |
| 15 | 700993   | 798516   | 97524   | 2  | LOC100139651, LOC781053, LOC781089, LOC781209                                                                                                                                                           |
| 15 | 798516   | 927750   | 129235  | 5  | LOC107133143, LOC517325, LOC531237, LOC618523, LOC788868, LOC788875, OR4C15                                                                                                                             |
| 15 | 927750   | 999765   | 72016   | 5  | LOC100139475, LOC530524, LOC532486                                                                                                                                                                      |
| 15 | 999765   | 1064091  | 64327   | 5  | LOC786395                                                                                                                                                                                               |
| 15 | 1064091  | 1128925  | 64835   | 4  | LOC515790, LOC786445, LOC786467                                                                                                                                                                         |
| 15 | 1128925  | 1219097  | 90173   | 4  | LOC508315, LOC786525, LOC787524, OR4C16                                                                                                                                                                 |
| 15 | 1219097  | 1287849  | 68753   | 2  | LOC787524                                                                                                                                                                                               |
| 15 | 1287849  | 1342835  | 54987   | 2  | LOC100300262, LOC100300302                                                                                                                                                                              |
| 15 | 1342835  | 1507825  | 164991  | 3  | .                                                                                                                                                                                                       |
| 15 | 1507825  | 1537140  | 29316   | 3  | IZUMO1R                                                                                                                                                                                                 |
| 15 | 1537140  | 1670784  | 133645  | 2  | GPR83, MRE11A                                                                                                                                                                                           |
| 15 | 2561559  | 2611609  | 50051   | 4  | GRIA4                                                                                                                                                                                                   |
| 15 | 2611609  | 2630928  | 19320   | 4  | GRIA4                                                                                                                                                                                                   |
| 15 | 2630928  | 2809624  | 178697  | 5  | GRIA4                                                                                                                                                                                                   |
| 15 | 2809624  | 2865901  | 56278   | 4  | .                                                                                                                                                                                                       |

|    |          |          |        |    |                                                                                |
|----|----------|----------|--------|----|--------------------------------------------------------------------------------|
| 15 | 2865901  | 2915278  | 49378  | 4  | .                                                                              |
| 15 | 2915278  | 3014146  | 98869  | 3  | .                                                                              |
| 15 | 3014146  | 3036600  | 22455  | 2  | .                                                                              |
| 15 | 3036600  | 3134225  | 97626  | 3  | .                                                                              |
| 15 | 3134225  | 3147569  | 13345  | 3  | .                                                                              |
| 15 | 3147569  | 3216393  | 68825  | 2  | .                                                                              |
| 15 | 4311001  | 4359127  | 48127  | 2  | .                                                                              |
| 15 | 4523355  | 4548650  | 25296  | 2  | LOC104974160, PDGFD                                                            |
| 15 | 4548650  | 4592761  | 44112  | 3  | PDGFD                                                                          |
| 15 | 4592761  | 4798875  | 206115 | 3  | DDI1, LOC104974158, PDGFD                                                      |
| 15 | 4798875  | 4896744  | 97870  | 4  | PDGFD                                                                          |
| 15 | 4896744  | 5030200  | 133457 | 4  | .                                                                              |
| 15 | 5030200  | 5078468  | 48269  | 3  | .                                                                              |
| 15 | 5078468  | 5106564  | 28097  | 6  | .                                                                              |
| 15 | 5106564  | 5413931  | 307368 | 4  | DYNC2H1                                                                        |
| 15 | 5413931  | 5502085  | 88155  | 2  | DYNC2H1                                                                        |
| 15 | 5502085  | 5594309  | 92225  | 2  | DYNC2H1, TRNAY-AUA                                                             |
| 15 | 5594309  | 5644722  | 50414  | 2  | DYNC2H1                                                                        |
| 15 | 5644722  | 5822012  | 177291 | 2  | DCUN1D5, DYNC2H1                                                               |
| 15 | 6622738  | 6679986  | 57249  | 2  | BIRC2                                                                          |
| 15 | 6694197  | 6803597  | 109401 | 4  | BIRC3, LOC100848148, LOC104974163, LOC104974165, LOC107133144, LOC783022, YAP1 |
| 15 | 6803597  | 6915737  | 112141 | 6  | YAP1                                                                           |
| 15 | 6915737  | 6937162  | 21426  | 7  | YAP1                                                                           |
| 15 | 6937162  | 6991992  | 54831  | 8  | C15H11orf70, LOC107133145, YAP1                                                |
| 15 | 6991992  | 7171690  | 179699 | 10 | C15H11orf70, CEP126, LOC101902649                                              |
| 15 | 7171690  | 7195534  | 23845  | 9  | CEP126                                                                         |
| 15 | 7195534  | 7251907  | 56374  | 8  | ANGPTL5                                                                        |
| 15 | 7251907  | 7275497  | 23591  | 8  | .                                                                              |
| 15 | 7275497  | 7391335  | 115839 | 8  | .                                                                              |
| 15 | 7391335  | 7402768  | 11434  | 10 | .                                                                              |
| 15 | 7402768  | 7447810  | 45043  | 8  | .                                                                              |
| 15 | 7447810  | 7460094  | 12285  | 5  | .                                                                              |
| 15 | 7460094  | 7468770  | 8677   | 3  | .                                                                              |
| 15 | 7468770  | 7537576  | 68807  | 4  | .                                                                              |
| 15 | 7537576  | 7597750  | 60175  | 5  | LOC787373                                                                      |
| 15 | 7597750  | 7651811  | 54062  | 6  | TRPC6                                                                          |
| 15 | 7651811  | 7750682  | 98872  | 6  | TRPC6                                                                          |
| 15 | 7750682  | 7856066  | 105385 | 3  | TRPC6                                                                          |
| 15 | 7856066  | 7875692  | 19627  | 4  | .                                                                              |
| 15 | 7875692  | 7956395  | 80704  | 3  | .                                                                              |
| 15 | 7956395  | 7997690  | 41296  | 4  | LOC787452                                                                      |
| 15 | 7997690  | 8041421  | 43732  | 5  | .                                                                              |
| 15 | 8217258  | 8282475  | 65218  | 2  | PGR                                                                            |
| 15 | 8300166  | 8313410  | 13245  | 3  | .                                                                              |
| 15 | 8313410  | 8379060  | 65651  | 4  | ARHGAP42                                                                       |
| 15 | 8379060  | 8559453  | 180394 | 3  | ARHGAP42, LOC107133147                                                         |
| 15 | 8559453  | 8724877  | 165425 | 2  | ARHGAP42                                                                       |
| 15 | 8724877  | 8783048  | 58172  | 5  | .                                                                              |
| 15 | 8783048  | 8948707  | 165660 | 5  | LOC101903693                                                                   |
| 15 | 8948707  | 8978430  | 29724  | 5  | .                                                                              |
| 15 | 8978430  | 9105346  | 126917 | 4  | LOC782668                                                                      |
| 15 | 9105346  | 9146354  | 41009  | 4  | .                                                                              |
| 15 | 9146354  | 9162502  | 16149  | 2  | .                                                                              |
| 15 | 9162502  | 9253461  | 90960  | 2  | .                                                                              |
| 15 | 9253461  | 9322157  | 68697  | 2  | .                                                                              |
| 15 | 9322157  | 9325130  | 2974   | 2  | .                                                                              |
| 15 | 9325130  | 9352143  | 27014  | 4  | .                                                                              |
| 15 | 9352143  | 9363622  | 11480  | 4  | .                                                                              |
| 15 | 9363622  | 9437747  | 74126  | 4  | .                                                                              |
| 15 | 9437747  | 9480106  | 42360  | 4  | .                                                                              |
| 15 | 9480106  | 9496428  | 16323  | 3  | .                                                                              |
| 15 | 9496428  | 9542150  | 45723  | 3  | CNTN5                                                                          |
| 15 | 9689095  | 9751449  | 62355  | 3  | CNTN5                                                                          |
| 15 | 9751449  | 9782462  | 31014  | 3  | CNTN5                                                                          |
| 15 | 9782462  | 9788664  | 6203   | 2  | CNTN5                                                                          |
| 15 | 9788664  | 9932903  | 144240 | 4  | CNTN5                                                                          |
| 15 | 9932903  | 9945498  | 12596  | 3  | CNTN5                                                                          |
| 15 | 9945498  | 9979898  | 34401  | 2  | CNTN5                                                                          |
| 15 | 10187137 | 10296843 | 109707 | 2  | .                                                                              |
| 15 | 10296843 | 10352428 | 55586  | 2  | .                                                                              |
| 15 | 10388445 | 10504667 | 116223 | 2  | .                                                                              |
| 15 | 10504667 | 10581564 | 76898  | 2  | .                                                                              |
| 15 | 10581564 | 10661811 | 80248  | 2  | .                                                                              |
| 15 | 10661811 | 10736157 | 74347  | 2  | .                                                                              |
| 15 | 10736157 | 10861560 | 125404 | 3  | .                                                                              |
| 15 | 10861560 | 10958768 | 97209  | 3  | LOC100138161                                                                   |
| 15 | 10958768 | 11028247 | 69480  | 2  | .                                                                              |
| 15 | 11452892 | 11475405 | 22514  | 2  | .                                                                              |
| 15 | 11475405 | 11644433 | 169029 | 2  | .                                                                              |
| 15 | 13456001 | 13576215 | 120215 | 2  | .                                                                              |
| 15 | 13576215 | 13612776 | 36562  | 2  | TRNAW-CCA                                                                      |
| 15 | 13612776 | 13681837 | 69062  | 3  | .                                                                              |
| 15 | 13681837 | 13725630 | 43794  | 3  | .                                                                              |
| 15 | 13725630 | 13885055 | 159426 | 3  | LOC100300167                                                                   |
| 15 | 13885055 | 13965740 | 80686  | 2  | .                                                                              |
| 15 | 13965740 | 13985195 | 19456  | 3  | .                                                                              |

|    |          |          |        |   |                                                                                                                                                                                      |
|----|----------|----------|--------|---|--------------------------------------------------------------------------------------------------------------------------------------------------------------------------------------|
| 15 | 13985195 | 14051835 | 66641  | 3 | .                                                                                                                                                                                    |
| 15 | 14051835 | 14117419 | 65585  | 3 | LOC783497                                                                                                                                                                            |
| 15 | 14117419 | 14210766 | 93348  | 2 | LOC101905762                                                                                                                                                                         |
| 15 | 14210766 | 14312414 | 101649 | 2 | CCDC82, JRKL, MAML2, MIR1260B                                                                                                                                                        |
| 15 | 14568802 | 15321300 | 752499 | 3 | CEP57, FAM76B, LOC101905912, MAML2, MTMR2                                                                                                                                            |
| 15 | 22694978 | 23094071 | 399094 | 2 | BCO2, C15H11orf1, C15H11orf52, C15H11orf57, CRYAB, DIXDC1, DLAT, HSPB2, IL18, LOC101903059, LOC101903125, LOC101906594, LOC104968480, LOC104974189, PIH1D2, PTS, SDHD, TEX12, TIMM8B |
| 15 | 23198666 | 23309471 | 110806 | 2 | LOC100847772                                                                                                                                                                         |
| 15 | 23309471 | 23501646 | 192176 | 2 | LOC100847772                                                                                                                                                                         |
| 15 | 23501646 | 23833546 | 331901 | 3 | LOC104974191, LOC107133153                                                                                                                                                           |
| 15 | 26967717 | 27099326 | 131610 | 4 | .                                                                                                                                                                                    |
| 15 | 30423392 | 30510276 | 86885  | 4 | ABCG4, CBL, CCDC153, NLRX1, PDZD3                                                                                                                                                    |
| 15 | 30510276 | 30869701 | 359426 | 5 | C1QTNF5, CBL, LOC101903835, MCAM, MFRP, RNF26, THY1, TRNAG-CCC, USP2                                                                                                                 |
| 15 | 30869701 | 31087909 | 218209 | 3 | MIR378B, PVRL1                                                                                                                                                                       |
| 15 | 34249521 | 34351275 | 101755 | 3 | BSX, C15H11orf63, LOC104974229, LOC107133161                                                                                                                                         |
| 15 | 34351275 | 34537981 | 186707 | 3 | CLMP, HSPA8, LOC107133162                                                                                                                                                            |
| 15 | 34537981 | 34696293 | 158313 | 3 | LOC107133163                                                                                                                                                                         |
| 15 | 37495307 | 37655305 | 159999 | 3 | LOC104974235, TRNAW-CCA                                                                                                                                                              |
| 15 | 37655305 | 38055456 | 400152 | 4 | LOC104974236, LOC104974237                                                                                                                                                           |
| 15 | 38055456 | 38087339 | 31884  | 4 | INSC                                                                                                                                                                                 |
| 15 | 38087339 | 38280952 | 193614 | 4 | CALCB, INSC                                                                                                                                                                          |
| 15 | 38280952 | 38282300 | 1349   | 3 | .                                                                                                                                                                                    |
| 15 | 38282300 | 38453064 | 170765 | 5 | CALCA, TRNAY-GUA                                                                                                                                                                     |
| 15 | 38453064 | 38478909 | 25846  | 4 | .                                                                                                                                                                                    |
| 15 | 38478909 | 38788999 | 310091 | 3 | CALCB, CYP2R1, LOC784945, PDE3B                                                                                                                                                      |
| 15 | 38788999 | 38819963 | 30965  | 3 | PDE3B, TRNAC-GCA                                                                                                                                                                     |
| 15 | 38819963 | 38972409 | 152447 | 4 | COPB1, LOC101905000, PDE3B, PSMA1                                                                                                                                                    |
| 15 | 38972409 | 39219097 | 246689 | 4 | COPB1, LOC104974239, LOC782705, RRAS2, SPON1                                                                                                                                         |
| 15 | 39219097 | 39240866 | 21770  | 3 | SPON1                                                                                                                                                                                |
| 15 | 39240866 | 39263524 | 22659  | 3 | SPON1                                                                                                                                                                                |
| 15 | 39263524 | 39386073 | 122550 | 3 | MIR2284T, SPON1                                                                                                                                                                      |
| 15 | 40010673 | 40021288 | 10616  | 2 | BTBD10                                                                                                                                                                               |
| 15 | 40021288 | 40220738 | 199451 | 2 | ARNTL, BTBD10                                                                                                                                                                        |
| 15 | 40220738 | 40235819 | 15082  | 2 | .                                                                                                                                                                                    |
| 15 | 40235819 | 40242932 | 7114   | 2 | .                                                                                                                                                                                    |
| 15 | 40242932 | 40534092 | 291161 | 2 | RASSF10, TEAD1                                                                                                                                                                       |
| 15 | 44995186 | 44998444 | 3259   | 2 | .                                                                                                                                                                                    |
| 15 | 44998444 | 45179949 | 181506 | 2 | LMO1, RIC3                                                                                                                                                                           |
| 15 | 45179949 | 45212167 | 32219  | 3 | RIC3                                                                                                                                                                                 |
| 15 | 45212167 | 45233004 | 20838  | 3 | LOC104974253, RIC3                                                                                                                                                                   |
| 15 | 45233004 | 45310156 | 77153  | 4 | LOC104974253, LOC107133167, TUB                                                                                                                                                      |
| 15 | 45310156 | 45449101 | 138946 | 4 | EIF3F, LOC107133167, LOC782660, LOC782731, LOC782910, LOC785565, NLRP10, OR10A3, OR10A6                                                                                              |
| 15 | 45449101 | 45562110 | 113010 | 2 | LOC529308, LOC539064, OR5P3, OVCH2                                                                                                                                                   |
| 15 | 45562110 | 45607287 | 45178  | 2 | LOC617062, LOC783210, OVCH2                                                                                                                                                          |
| 15 | 45607287 | 45628443 | 21157  | 2 | LOC538744, OVCH2                                                                                                                                                                     |
| 15 | 45628443 | 45668395 | 39953  | 2 | LOC782576, LOC783281, OVCH2                                                                                                                                                          |
| 15 | 46084774 | 46523739 | 438966 | 2 | NLRP14, RBMXL2, SYT9                                                                                                                                                                 |
| 15 | 49848538 | 49904509 | 55972  | 2 | LOC100137850, LOC782254, OR51F2, OR51S1                                                                                                                                              |
| 15 | 49904509 | 50002618 | 98110  | 3 | LOC100852273, LOC508595, LOC527918, LOC782373, LOC782428, LOC784379, LOC788815, OR51T1                                                                                               |
| 15 | 50002618 | 50066692 | 64075  | 3 | LOC100337195, LOC511823, LOC785207, LOC785238, LOC785407                                                                                                                             |
| 15 | 50066692 | 50136952 | 70261  | 2 | LOC100337265, LOC100847430, LOC100847455, LOC785049, OR52E2                                                                                                                          |
| 15 | 50136952 | 50181043 | 44092  | 2 | LOC617700, LOC785144                                                                                                                                                                 |
| 15 | 50517660 | 50605658 | 87999  | 2 | LOC782960, LOC783446, LOC783488, LOC783529, LOC783558                                                                                                                                |
| 15 | 50605658 | 50632792 | 27135  | 2 | LOC783401                                                                                                                                                                            |
| 15 | 50632792 | 50677785 | 44994  | 2 | LOC100848221, LOC530990, LOC783323, LOC783401                                                                                                                                        |
| 15 | 50677785 | 50693905 | 16121  | 2 | LOC107131374                                                                                                                                                                         |
| 15 | 50787692 | 50850242 | 62551  | 4 | LOC524658, LOC528515, LOC788674, LOC788692                                                                                                                                           |
| 15 | 50850242 | 50960440 | 110199 | 6 | LOC100848377, LOC100848398, LOC107133172, LOC788703, LOC788722, LOC788731, LOC788750, LOC788763                                                                                      |
| 15 | 50960440 | 51032155 | 71716  | 2 | LOC504551, LOC506897, LOC782623, LOC782658, LOC782692, OR51A7                                                                                                                        |
| 15 | 52642370 | 52760299 | 117930 | 2 | IL18BP, LRRC51, NUMA1, RNF121                                                                                                                                                        |
| 15 | 52760299 | 52813813 | 53515  | 3 | ANAPC15, LAMTOR1, LRRC51, TOMT                                                                                                                                                       |
| 15 | 52813813 | 52885415 | 71603  | 2 | FOLR1, FOLR2, FOLR3, INPPL1, PHOX2A, TRNAG-CCC                                                                                                                                       |
| 15 | 52885415 | 53227393 | 341979 | 2 | CLPB, LOC104974266, LOC104974267, MIR139, PDE2A                                                                                                                                      |
| 15 | 53269943 | 53543723 | 273781 | 5 | ARAP1, ATG16L2, FCHSD2, STARD10                                                                                                                                                      |
| 15 | 53543723 | 53689333 | 145611 | 6 | FCHSD2                                                                                                                                                                               |
| 15 | 53689333 | 53800683 | 111351 | 5 | LOC104974269, P2RY2                                                                                                                                                                  |
| 15 | 53800683 | 53838935 | 38253  | 4 | P2RY6                                                                                                                                                                                |
| 15 | 53838935 | 54009255 | 170321 | 5 | ARHGEF17, FAM168A, RELT                                                                                                                                                              |
| 15 | 54009255 | 54085744 | 76490  | 5 | .                                                                                                                                                                                    |
| 15 | 55604265 | 55880540 | 276276 | 2 | GDPD5, KLHL35, LOC101905131, MAP6, RPS3, SERPINH1                                                                                                                                    |
| 15 | 57501392 | 57529882 | 28491  | 6 | B3GN76                                                                                                                                                                               |
| 15 | 57529882 | 57712553 | 182672 | 6 | CAPN5, MYO7A                                                                                                                                                                         |
| 15 | 57712553 | 57895111 | 182559 | 6 | LOC786511, LOC786996                                                                                                                                                                 |
| 15 | 57895111 | 58137771 | 242661 | 4 | ANO3                                                                                                                                                                                 |
| 15 | 58137771 | 58486397 | 348627 | 4 | ANO3, MUC15, SLC5A12                                                                                                                                                                 |
| 15 | 58486397 | 58553800 | 67404  | 4 | .                                                                                                                                                                                    |
| 15 | 58553800 | 58625548 | 71749  | 2 | .                                                                                                                                                                                    |
| 15 | 58625548 | 58756742 | 131195 | 2 | .                                                                                                                                                                                    |
| 15 | 58756742 | 58945254 | 188513 | 2 | BBOX1, FIBIN, LOC104974280                                                                                                                                                           |
| 15 | 58945254 | 58986097 | 40844  | 2 | LOC104974279, LOC104974280                                                                                                                                                           |
| 15 | 59492081 | 60398586 | 906506 | 2 | KIF18A, METTL15, TRNAC-GCA                                                                                                                                                           |
| 15 | 60514152 | 60614145 | 99994  | 3 | .                                                                                                                                                                                    |
| 15 | 60614145 | 60649299 | 35155  | 4 | .                                                                                                                                                                                    |

|    |          |          |        |    |                                                                                                                                                                                                                 |
|----|----------|----------|--------|----|-----------------------------------------------------------------------------------------------------------------------------------------------------------------------------------------------------------------|
| 15 | 60649299 | 60765431 | 116133 | 5  | .                                                                                                                                                                                                               |
| 15 | 60765431 | 60772144 | 6714   | 3  | .                                                                                                                                                                                                               |
| 15 | 62905024 | 63031312 | 126289 | 2  | .                                                                                                                                                                                                               |
| 15 | 63096354 | 63285273 | 188920 | 2  | <i>DCDC1, DNAJC24</i>                                                                                                                                                                                           |
| 15 | 63285273 | 63428577 | 143305 | 4  | <i>DNAJC24, ELP4, IMMP1L</i>                                                                                                                                                                                    |
| 15 | 63428577 | 63468424 | 39848  | 2  | <i>ELP4</i>                                                                                                                                                                                                     |
| 15 | 65782970 | 65863754 | 80785  | 3  | <i>ABTB2, CAPRIN1, NAT10</i>                                                                                                                                                                                    |
| 15 | 65863754 | 66011612 | 147859 | 2  | <i>ABTB2</i>                                                                                                                                                                                                    |
| 15 | 66011612 | 66239371 | 227760 | 4  | <i>ABTB2, CAT, ELF5, LOC104974297</i>                                                                                                                                                                           |
| 15 | 66239371 | 66289548 | 50178  | 6  | .                                                                                                                                                                                                               |
| 15 | 66289548 | 66314351 | 24804  | 7  | .                                                                                                                                                                                                               |
| 15 | 66314351 | 66433469 | 119119 | 3  | <i>EHF, LOC100140140</i>                                                                                                                                                                                        |
| 15 | 66492589 | 66570667 | 78079  | 2  | <i>APIP, PDHX</i>                                                                                                                                                                                               |
| 15 | 67016664 | 67301731 | 285068 | 4  | <i>FJX1, PAMR1, SLC1A2</i>                                                                                                                                                                                      |
| 15 | 67301731 | 67360846 | 59116  | 4  | <i>TRIM44</i>                                                                                                                                                                                                   |
| 15 | 67360846 | 67459127 | 98282  | 5  | <i>TRIM44</i>                                                                                                                                                                                                   |
| 15 | 67459127 | 67469527 | 10401  | 4  | .                                                                                                                                                                                                               |
| 15 | 67469527 | 67575822 | 106296 | 3  | <i>LDLRAD3, LOC104974302, LOC104974303</i>                                                                                                                                                                      |
| 15 | 68296993 | 68333207 | 36215  | 2  | .                                                                                                                                                                                                               |
| 15 | 68333207 | 68416858 | 83652  | 3  | .                                                                                                                                                                                                               |
| 15 | 68416858 | 68672236 | 255379 | 3  | .                                                                                                                                                                                                               |
| 15 | 68672236 | 68719014 | 46779  | 2  | .                                                                                                                                                                                                               |
| 15 | 68719014 | 68721815 | 2802   | 2  | .                                                                                                                                                                                                               |
| 15 | 68721815 | 68970434 | 248620 | 3  | .                                                                                                                                                                                                               |
| 15 | 68970434 | 69007980 | 37547  | 2  | .                                                                                                                                                                                                               |
| 15 | 69050267 | 69155847 | 105581 | 3  | .                                                                                                                                                                                                               |
| 15 | 69155847 | 69211436 | 55590  | 2  | .                                                                                                                                                                                                               |
| 15 | 69211436 | 69357951 | 146516 | 4  | <i>LOC617085</i>                                                                                                                                                                                                |
| 15 | 69357951 | 69414086 | 56136  | 4  | .                                                                                                                                                                                                               |
| 15 | 69414086 | 69574994 | 160909 | 5  | .                                                                                                                                                                                                               |
| 15 | 69574994 | 69635298 | 60305  | 6  | .                                                                                                                                                                                                               |
| 15 | 69635298 | 69684992 | 49695  | 5  | .                                                                                                                                                                                                               |
| 15 | 70217332 | 70301067 | 83736  | 2  | .                                                                                                                                                                                                               |
| 15 | 70301067 | 70413442 | 112376 | 3  | .                                                                                                                                                                                                               |
| 15 | 70953910 | 71033477 | 79568  | 3  | .                                                                                                                                                                                                               |
| 15 | 71033477 | 71139300 | 105824 | 3  | .                                                                                                                                                                                                               |
| 15 | 71139300 | 71168246 | 28947  | 3  | .                                                                                                                                                                                                               |
| 15 | 71502793 | 71643861 | 141069 | 2  | <i>LRRC4C</i>                                                                                                                                                                                                   |
| 15 | 71643861 | 71648547 | 4687   | 2  | <i>LRRC4C</i>                                                                                                                                                                                                   |
| 15 | 71648547 | 71836206 | 187660 | 3  | <i>LOC104974309, LRRC4C</i>                                                                                                                                                                                     |
| 15 | 71836206 | 71968450 | 132245 | 4  | <i>LRRC4C</i>                                                                                                                                                                                                   |
| 15 | 71968450 | 72108708 | 140259 | 3  | <i>LRRC4C</i>                                                                                                                                                                                                   |
| 15 | 72108708 | 72185684 | 76977  | 9  | <i>LRRC4C</i>                                                                                                                                                                                                   |
| 15 | 72185684 | 72198480 | 12797  | 9  | <i>LRRC4C</i>                                                                                                                                                                                                   |
| 15 | 72198480 | 72250100 | 51621  | 10 | <i>LRRC4C</i>                                                                                                                                                                                                   |
| 15 | 72250100 | 72254368 | 4269   | 13 | <i>LRRC4C</i>                                                                                                                                                                                                   |
| 15 | 72254368 | 72303509 | 49142  | 15 | <i>LRRC4C</i>                                                                                                                                                                                                   |
| 15 | 72303509 | 72415617 | 112109 | 14 | <i>LRRC4C</i>                                                                                                                                                                                                   |
| 15 | 72415617 | 72812971 | 397355 | 10 | <i>LRRC4C</i>                                                                                                                                                                                                   |
| 15 | 72812971 | 72822012 | 9042   | 9  | <i>LRRC4C, MSANTD3</i>                                                                                                                                                                                          |
| 15 | 72822012 | 72877384 | 55373  | 4  | <i>LRRC4C, MSANTD3</i>                                                                                                                                                                                          |
| 15 | 72877384 | 72923858 | 46475  | 2  | <i>LRRC4C</i>                                                                                                                                                                                                   |
| 15 | 72923858 | 73157900 | 234043 | 4  | <i>LOC107133187, LRRC4C</i>                                                                                                                                                                                     |
| 15 | 73157900 | 73175015 | 17116  | 4  | .                                                                                                                                                                                                               |
| 15 | 73175015 | 73284840 | 109826 | 3  | <i>LOC107133188</i>                                                                                                                                                                                             |
| 15 | 73376693 | 73517398 | 140706 | 2  | .                                                                                                                                                                                                               |
| 15 | 73517398 | 73625299 | 107902 | 3  | .                                                                                                                                                                                                               |
| 15 | 73625299 | 73949859 | 324561 | 3  | .                                                                                                                                                                                                               |
| 15 | 73981098 | 74027572 | 46475  | 2  | .                                                                                                                                                                                                               |
| 15 | 74027572 | 74101940 | 74369  | 2  | .                                                                                                                                                                                                               |
| 15 | 78102753 | 78212796 | 110044 | 2  | <i>LOC100138331, LOC104970192, LOC107133184, LOC509025, LOC509617, LOC617614</i>                                                                                                                                |
| 15 | 78212796 | 78401816 | 189021 | 2  | <i>LOC100336492, LOC100848485, LOC104974327</i>                                                                                                                                                                 |
| 15 | 78867381 | 78966357 | 98977  | 4  | <i>CELF1, KBTBD4, NDUFS3, PTPMT1</i>                                                                                                                                                                            |
| 15 | 78966357 | 79014661 | 48305  | 5  | <i>C1QTNF4, FAM180B, MTCH2</i>                                                                                                                                                                                  |
| 15 | 79014661 | 79082648 | 67988  | 4  | <i>AGBL2, FNBP4</i>                                                                                                                                                                                             |
| 15 | 79082648 | 79252657 | 170010 | 3  | <i>FNBP4, LOC100848627, LOC104974328, LOC104974330, NUP160</i>                                                                                                                                                  |
| 15 | 79993193 | 80043709 | 50517  | 4  | <i>LOC521252, LOC789247, LOC789269</i>                                                                                                                                                                          |
| 15 | 80043709 | 80089785 | 46077  | 3  | <i>LOC100140748, LOC528722, LOC789269, OR5D13</i>                                                                                                                                                               |
| 15 | 80089785 | 80184812 | 95028  | 3  | <i>LOC100140283, LOC511865, LOC520162, LOC787563, LOC789288, LOC789293, LOC789300, OR5I1</i>                                                                                                                    |
| 15 | 83495928 | 83520040 | 24113  | 2  | <i>LOC515045</i>                                                                                                                                                                                                |
| 15 | 83520040 | 83580022 | 59983  | 3  | <i>LOC100301403, LOC101907482, LOC509710</i>                                                                                                                                                                    |
| 15 | 83580022 | 83648435 | 68414  | 3  | <i>LPXN, ZFP91</i>                                                                                                                                                                                              |
| 15 | 83648435 | 83764513 | 116079 | 3  | <i>CNTF, LOC518623, LOC787861, TRNAF-GAA, ZFP91</i>                                                                                                                                                             |
| 15 | 83764513 | 83777255 | 12743  | 2  | <i>LOC518623</i>                                                                                                                                                                                                |
| 15 | 83917047 | 83999005 | 81959  | 3  | <i>FAM111B, LOC100138922</i>                                                                                                                                                                                    |
| 15 | 84112781 | 84181593 | 68813  | 2  | <i>LOC107133206, LOC519282</i>                                                                                                                                                                                  |
| 15 | 84181593 | 84345360 | 163768 | 3  | <i>LOC100299686, LOC100848982, LOC107131345, LOC504200, LOC516439, LOC785818, LOC785899</i>                                                                                                                     |
| 15 | 84345360 | 84593201 | 247842 | 4  | <i>LOC101907407, LOC107133209, LOC505072, LOC512441, LOC514071, LOC514367, LOC530068, LOC616011, LOC788587, OR4D11, OR4D6, OR4D9, OR5A1, OSBP, PATL1, TRNAF-GAA, TRNAK-UUU, TRNAL-UAA, TRNAR-UCU, TRNAV-UAC</i> |
| 15 | 84593201 | 84642437 | 49237  | 4  | <i>LOC101907407, OR10V1</i>                                                                                                                                                                                     |
| 15 | 84642437 | 84701574 | 59138  | 4  | <i>LOC527077, STX3</i>                                                                                                                                                                                          |
| 15 | 84701574 | 84798461 | 96888  | 3  | <i>GIF, MRPL16, STX3, TCN1, TRNAG-CCC</i>                                                                                                                                                                       |
| 15 | 84798461 | 84856465 | 58005  | 4  | <i>LOC101903724, LOC104970391, OOSP1</i>                                                                                                                                                                        |

|    |          |          |         |    |                                                                                                                                                                                                                                                                                                                                                                                                                     |
|----|----------|----------|---------|----|---------------------------------------------------------------------------------------------------------------------------------------------------------------------------------------------------------------------------------------------------------------------------------------------------------------------------------------------------------------------------------------------------------------------|
| 15 | 84856465 | 85129664 | 273200  | 4  | LOC100849053, LOC101903724, LOC107133207, MIR6519, MS4A1, MS4A13, MS4A14, MS4A2, MS4A3, MS4A5, MS4A7                                                                                                                                                                                                                                                                                                                |
| 15 | 85452457 | 85561261 | 108805  | 2  | LOC100335879, LOC104969826, LOC107133208                                                                                                                                                                                                                                                                                                                                                                            |
| 16 | 1767     | 470502   | 468736  | 4  | LOC524282, LOC618608, LOC787541, LOC787560, LOC787592, LOC787605, LOC787620, LOC787642, LOC787667, LOC787745, LOC789376, OR5L1, TRNAR-UCU                                                                                                                                                                                                                                                                           |
| 16 | 470502   | 1258146  | 787645  | 6  | ADORA1, ATP2B4, BTG2, CHI3L1, CHIT1, FMOD, LOC100139016, LOC100140718, LOC100847554, LOC101906460, LOC101906704, LOC107133210, LOC107133212, LOC107133214, MYBPH, MYOG, OPTC, PPFIA4, PRELP, TMEM183A                                                                                                                                                                                                               |
| 16 | 1258146  | 1272655  | 14510   | 4  | ATP2B4                                                                                                                                                                                                                                                                                                                                                                                                              |
| 16 | 1272655  | 2013054  | 740400  | 4  | ATP2B4, ETNK2, GOLT1A, KISS1, LAX1, LOC101907689, LOC101907913, LOC104974354, LOC107133215, PIK3C2B, PLEKHA6, PPP1R15B, REN, SNRPE, SOX13, ZC3H11A                                                                                                                                                                                                                                                                  |
| 16 | 13671828 | 13749912 | 78085   | 3  | .                                                                                                                                                                                                                                                                                                                                                                                                                   |
| 16 | 13749912 | 13949666 | 199755  | 3  | LOC107133223, RGS18                                                                                                                                                                                                                                                                                                                                                                                                 |
| 16 | 21651315 | 21920738 | 269424  | 2  | GPATCH2, SPATA17                                                                                                                                                                                                                                                                                                                                                                                                    |
| 16 | 28610182 | 29173240 | 563059  | 4  | CNIH3, DNAH14, LOC107133226, LOC785251                                                                                                                                                                                                                                                                                                                                                                              |
| 16 | 35761270 | 35791594 | 30325   | 2  | LOC104974409, LOC104974410                                                                                                                                                                                                                                                                                                                                                                                          |
| 16 | 35791594 | 36076798 | 285205  | 2  | BECN2, CHML, EXO1, LOC101907876, MAP1LC3C, WDR64                                                                                                                                                                                                                                                                                                                                                                    |
| 16 | 36076798 | 36608105 | 531308  | 2  | FH, KMO, LOC100298153, LOC782999, RGS7                                                                                                                                                                                                                                                                                                                                                                              |
| 16 | 36608105 | 36628161 | 20057   | 2  | RGS7                                                                                                                                                                                                                                                                                                                                                                                                                |
| 16 | 36628161 | 36705878 | 77718   | 2  | RGS7                                                                                                                                                                                                                                                                                                                                                                                                                |
| 16 | 36705878 | 38273516 | 1567639 | 2  | ATP1B1, BLZF1, CCDC181, DPT, F5, LOC100848690, LOC101908227, LOC104974416, LOC104974419, LOC104974420, LOC107133232, LOC107133233, LOC783740, NME7, RGS7, SELP, SLC19A2, TRNAC-ACA, TRNAC-GCA, TRNAG-CCC, TRNAY-GUA, XCL1, XCL2                                                                                                                                                                                     |
| 16 | 54884776 | 54958733 | 73958   | 4  | KAZN                                                                                                                                                                                                                                                                                                                                                                                                                |
| 16 | 54958733 | 55011164 | 52432   | 4  | KAZN                                                                                                                                                                                                                                                                                                                                                                                                                |
| 16 | 55011164 | 55411802 | 400639  | 7  | KAZN, PRDM2                                                                                                                                                                                                                                                                                                                                                                                                         |
| 16 | 56115073 | 58259980 | 2144908 | 6  | AADACL3, ANKRD45, C16H1orf158, CACYBP, CENPL, DARS2, GPR52, KIAA0040, KLHL20, LOC100138041, LOC100299783, LOC100299866, LOC100336249, LOC100336653, LOC100848270, LOC100848315, LOC100848389, LOC101908155, LOC104974479, LOC104974493, LOC107131215, LOC107133244, LOC517884, LOC522065, LOC528132, LOC530538, LOC617709, LOC781733, LOC790218, MRPS14, PRDX6, RABGAP1L, RC3H1, SERPINC1, SLC9C2, TNN, TNR, ZBTB37 |
| 16 | 61953278 | 62607812 | 654535  | 9  | ABL2, AXDND1, FAM163A, FAM20B, LOC101903932, LOC107133254, NPHS2, SOAT1, TDRD5, TOR3A, TRNAS-GGA                                                                                                                                                                                                                                                                                                                    |
| 16 | 62607812 | 63371862 | 764051  | 4  | ACBD6, CEP350, FAM163A, LHX4, QSOX1, TOR1AIP1, TOR1AIP2                                                                                                                                                                                                                                                                                                                                                             |
| 16 | 70586673 | 70868851 | 282179  | 3  | CENPF, PTPN14                                                                                                                                                                                                                                                                                                                                                                                                       |
| 16 | 71378471 | 71986857 | 608387  | 2  | LOC100139281, LOC101909678, LOC104972797, LOC104972800, LOC104974513, PPP1R12B, PROX1, SMYD2, SYT2                                                                                                                                                                                                                                                                                                                  |
| 17 | 1395     | 587843   | 586449  | 4  | CPE, KLHL2, LOC100295562, LOC101902493, LOC104974555, LOC508314, LOC511436, LOC781637, LOC781676, LOC781712, MSMO1, TMEM192                                                                                                                                                                                                                                                                                         |
| 17 | 1805734  | 2131417  | 325684  | 3  | MAP9, NPY2R, TLL1                                                                                                                                                                                                                                                                                                                                                                                                   |
| 17 | 2131417  | 2247074  | 115658  | 2  | .                                                                                                                                                                                                                                                                                                                                                                                                                   |
| 17 | 2247074  | 2484578  | 237505  | 2  | .                                                                                                                                                                                                                                                                                                                                                                                                                   |
| 17 | 4893111  | 5408428  | 515318  | 2  | FBXW7, LOC104974562, LOC107133272, TIGD4, TMEM154, TRNAY-GUA                                                                                                                                                                                                                                                                                                                                                        |
| 17 | 5408428  | 5942670  | 534243  | 4  | LOC785575, TRNAW-CCA                                                                                                                                                                                                                                                                                                                                                                                                |
| 17 | 5942670  | 6560919  | 618250  | 3  | BRAP, FAM160A1, GATB, MIR2404-1, PRSS48, SH3D19                                                                                                                                                                                                                                                                                                                                                                     |
| 17 | 8342362  | 8662697  | 320336  | 6  | .                                                                                                                                                                                                                                                                                                                                                                                                                   |
| 17 | 8662697  | 8705526  | 42830   | 3  | TRNAC-GCA                                                                                                                                                                                                                                                                                                                                                                                                           |
| 17 | 8705526  | 8859112  | 153587  | 2  | .                                                                                                                                                                                                                                                                                                                                                                                                                   |
| 17 | 8859112  | 8870332  | 11221   | 7  | .                                                                                                                                                                                                                                                                                                                                                                                                                   |
| 17 | 8870332  | 8890825  | 20494   | 13 | .                                                                                                                                                                                                                                                                                                                                                                                                                   |
| 17 | 8890825  | 9017455  | 126631  | 15 | LOC100336978, LOC523431                                                                                                                                                                                                                                                                                                                                                                                             |
| 17 | 9017455  | 9426429  | 408975  | 2  | LOC101905833, LOC104974568                                                                                                                                                                                                                                                                                                                                                                                          |
| 17 | 9426429  | 9761623  | 335195  | 12 | LOC104974568, LOC104974569                                                                                                                                                                                                                                                                                                                                                                                          |
| 17 | 9761623  | 9804448  | 42826   | 10 | LOC104974569, NR3C2                                                                                                                                                                                                                                                                                                                                                                                                 |
| 17 | 9804448  | 10822405 | 1017958 | 2  | ARHGAP10, EDNRA, LOC100297399, LOC100847708, LOC101906279, LOC107133274, NR3C2, PRMT9, TMEM184C, TRNAC-ACA                                                                                                                                                                                                                                                                                                          |
| 17 | 10822405 | 10954800 | 132396  | 4  | EDNRA                                                                                                                                                                                                                                                                                                                                                                                                               |
| 17 | 11304404 | 11454829 | 150426  | 2  | LOC101906544                                                                                                                                                                                                                                                                                                                                                                                                        |
| 17 | 11454829 | 11606876 | 152048  | 2  | TTC29                                                                                                                                                                                                                                                                                                                                                                                                               |
| 17 | 11836924 | 11939871 | 102948  | 3  | POU4F2                                                                                                                                                                                                                                                                                                                                                                                                              |
| 17 | 11939871 | 12064974 | 125104  | 5  | SLC10A7                                                                                                                                                                                                                                                                                                                                                                                                             |
| 17 | 12064974 | 12197387 | 132414  | 4  | SLC10A7                                                                                                                                                                                                                                                                                                                                                                                                             |
| 17 | 12197387 | 12217654 | 20268   | 3  | .                                                                                                                                                                                                                                                                                                                                                                                                                   |
| 17 | 12217654 | 12341724 | 124071  | 2  | LOC101906679, LOC107133273                                                                                                                                                                                                                                                                                                                                                                                          |
| 17 | 13170454 | 13335712 | 165259  | 2  | LOC100847839, LOC101907935                                                                                                                                                                                                                                                                                                                                                                                          |
| 17 | 14667857 | 15140145 | 472289  | 2  | GAB1, LOC101906545, LOC107133279, TRNAK-UUU, USP38                                                                                                                                                                                                                                                                                                                                                                  |
| 17 | 16072619 | 16305262 | 232644  | 3  | INPP4B                                                                                                                                                                                                                                                                                                                                                                                                              |
| 17 | 16399789 | 16995936 | 596148  | 2  | IL15, ZNF330                                                                                                                                                                                                                                                                                                                                                                                                        |
| 17 | 17170033 | 17456583 | 286551  | 3  | RNF150, TBC1D9, TRNAR-CCU                                                                                                                                                                                                                                                                                                                                                                                           |
| 17 | 18549027 | 18744651 | 195625  | 4  | LOC100848703, LOC101907619, NAA15, RAB33B, SETD7                                                                                                                                                                                                                                                                                                                                                                    |
| 17 | 18744651 | 18832024 | 87374   | 4  | LOC101907758, LOC101907835, LOC107133275, MGARP, NAA15, NDUFC1, TRNAE-CUC                                                                                                                                                                                                                                                                                                                                           |
| 17 | 25102772 | 25990366 | 887595  | 8  | LOC100336402, LOC107131277, LOC786811, PCDH10, TRNAC-GCA                                                                                                                                                                                                                                                                                                                                                            |
| 17 | 25990366 | 26051601 | 61236   | 9  | .                                                                                                                                                                                                                                                                                                                                                                                                                   |
| 17 | 26051601 | 26338823 | 287223  | 6  | .                                                                                                                                                                                                                                                                                                                                                                                                                   |
| 17 | 26338823 | 27276113 | 937291  | 4  | .                                                                                                                                                                                                                                                                                                                                                                                                                   |
| 17 | 27276113 | 27531537 | 255425  | 5  | LOC104974594                                                                                                                                                                                                                                                                                                                                                                                                        |
| 17 | 27531537 | 27989253 | 457717  | 4  | LOC104974594                                                                                                                                                                                                                                                                                                                                                                                                        |
| 17 | 27989253 | 28490828 | 501576  | 8  | .                                                                                                                                                                                                                                                                                                                                                                                                                   |
| 17 | 28490828 | 28813313 | 322486  | 8  | LOC785705                                                                                                                                                                                                                                                                                                                                                                                                           |
| 17 | 28813313 | 29011304 | 197992  | 10 | LOC782706                                                                                                                                                                                                                                                                                                                                                                                                           |
| 17 | 29011304 | 29184303 | 173000  | 5  | .                                                                                                                                                                                                                                                                                                                                                                                                                   |



|    |          |          |         |    |                                                                                                                                                                                                                                                                                                                                                                                                                                                                    |
|----|----------|----------|---------|----|--------------------------------------------------------------------------------------------------------------------------------------------------------------------------------------------------------------------------------------------------------------------------------------------------------------------------------------------------------------------------------------------------------------------------------------------------------------------|
| 17 | 29184303 | 30592020 | 1407718 | 2  | ABHD18, C17H4orf33, HSPA4L, INTU, JADE1, LARP1B, LOC100138580, LOC100140839, LOC100336168, LOC101902922, LOC101903013, LOC101903064, LOC101904901, LOC1017133276, LOC1017133277, LOC1017133282, LOC1017133283, LOC781255, LOC781318, LOC781528, MFSD8, PGRMC2, PLK4, SCLT1, SLC25A31 LOC101903780                                                                                                                                                                  |
| 17 | 30592020 | 30811918 | 219899  | 4  |                                                                                                                                                                                                                                                                                                                                                                                                                                                                    |
| 17 | 30811918 | 30839331 | 27414   | 2  | .                                                                                                                                                                                                                                                                                                                                                                                                                                                                  |
| 17 | 30839331 | 30874321 | 34991   | 2  | .                                                                                                                                                                                                                                                                                                                                                                                                                                                                  |
| 17 | 31727457 | 32321406 | 593950  | 2  | LOC104974601, LOC104974602, LOC1017133286, LOC781055                                                                                                                                                                                                                                                                                                                                                                                                               |
| 17 | 32321406 | 32405749 | 84344   | 4  | LOC781055                                                                                                                                                                                                                                                                                                                                                                                                                                                          |
| 17 | 32405749 | 32655550 | 249802  | 5  | .                                                                                                                                                                                                                                                                                                                                                                                                                                                                  |
| 17 | 32655550 | 32672983 | 17434   | 6  | .                                                                                                                                                                                                                                                                                                                                                                                                                                                                  |
| 17 | 32672983 | 33234404 | 561422  | 6  | FAT4                                                                                                                                                                                                                                                                                                                                                                                                                                                               |
| 17 | 33234404 | 33433568 | 199165  | 2  | .                                                                                                                                                                                                                                                                                                                                                                                                                                                                  |
| 17 | 33433568 | 33478164 | 44597   | 2  | .                                                                                                                                                                                                                                                                                                                                                                                                                                                                  |
| 17 | 33478164 | 33795557 | 317394  | 2  | ANKRD50                                                                                                                                                                                                                                                                                                                                                                                                                                                            |
| 17 | 34201391 | 34318319 | 116929  | 2  | .                                                                                                                                                                                                                                                                                                                                                                                                                                                                  |
| 17 | 34318319 | 35528384 | 1210066 | 3  | BBS12, CETN4, FGF2, LOC104974605, LOC104974607, LOC104974608, LOC1017133284, NUDT6, SPATA5, SPRY1                                                                                                                                                                                                                                                                                                                                                                  |
| 17 | 35528384 | 35753987 | 225604  | 10 | IL2, IL21                                                                                                                                                                                                                                                                                                                                                                                                                                                          |
| 17 | 35753987 | 36393410 | 639424  | 9  | ADAD1, KIAA1109, LOC100300040, LOC100336709, LOC100336794, LOC1017131163, LOC1017133285, LOC781972, LOC789301, TRNAW-CCA                                                                                                                                                                                                                                                                                                                                           |
| 17 | 36393410 | 36450587 | 57178   | 6  | LOC1017131163                                                                                                                                                                                                                                                                                                                                                                                                                                                      |
| 17 | 36450587 | 36638846 | 188260  | 3  | LOC1017131163, LOC782754                                                                                                                                                                                                                                                                                                                                                                                                                                           |
| 17 | 36638846 | 37058800 | 419955  | 2  | LOC101909438, LOC101909472, TRPC3                                                                                                                                                                                                                                                                                                                                                                                                                                  |
| 17 | 37058800 | 37129898 | 71099   | 2  | .                                                                                                                                                                                                                                                                                                                                                                                                                                                                  |
| 17 | 39386465 | 39986037 | 599573  | 5  | LOC783124                                                                                                                                                                                                                                                                                                                                                                                                                                                          |
| 17 | 39986037 | 40116898 | 130862  | 2  | ULBP3                                                                                                                                                                                                                                                                                                                                                                                                                                                              |
| 17 | 40424224 | 41590744 | 1166521 | 3  | C17H4orf45, C17H4orf46, ETFDH, FNIP2, LOC101904878, LOC101904929, LOC1017133287, LOC1017133289, PPID, RAPGEF2, RXFP1, TNIP3                                                                                                                                                                                                                                                                                                                                        |
| 17 | 41630435 | 41943543 | 313109  | 7  | FAM198B, LOC1017133288, TMEM144                                                                                                                                                                                                                                                                                                                                                                                                                                    |
| 17 | 41943543 | 42350898 | 407356  | 4  | LOC101903911                                                                                                                                                                                                                                                                                                                                                                                                                                                       |
| 17 | 42407254 | 42738964 | 331711  | 4  | TRNAG-CCC                                                                                                                                                                                                                                                                                                                                                                                                                                                          |
| 17 | 42738964 | 43251347 | 512384  | 5  | GLRB, GRIA2, MIR2321, TRNAC-GCA                                                                                                                                                                                                                                                                                                                                                                                                                                    |
| 17 | 43251347 | 43635581 | 384235  | 5  | LOC104974614, LOC1017133291, PDGFC                                                                                                                                                                                                                                                                                                                                                                                                                                 |
| 17 | 43635581 | 43933300 | 297720  | 2  | LOC1017133291                                                                                                                                                                                                                                                                                                                                                                                                                                                      |
| 17 | 43933300 | 44231724 | 298425  | 5  | .                                                                                                                                                                                                                                                                                                                                                                                                                                                                  |
| 17 | 44231724 | 44396481 | 164758  | 5  | .                                                                                                                                                                                                                                                                                                                                                                                                                                                                  |
| 17 | 44396481 | 44563542 | 167062  | 4  | ASIC5, CTSO, TDO2                                                                                                                                                                                                                                                                                                                                                                                                                                                  |
| 17 | 44563542 | 44620523 | 56982   | 5  | ASIC5                                                                                                                                                                                                                                                                                                                                                                                                                                                              |
| 17 | 44620523 | 44645887 | 25365   | 6  | GUCY1B3                                                                                                                                                                                                                                                                                                                                                                                                                                                            |
| 17 | 44645887 | 44853002 | 207116  | 5  | GUCY1A3, GUCY1B3, LOC101904168                                                                                                                                                                                                                                                                                                                                                                                                                                     |
| 17 | 44853002 | 44966876 | 113875  | 4  | LOC101904168                                                                                                                                                                                                                                                                                                                                                                                                                                                       |
| 17 | 46717178 | 46743055 | 25878   | 2  | .                                                                                                                                                                                                                                                                                                                                                                                                                                                                  |
| 17 | 46743055 | 47206627 | 463573  | 4  | ADGRD1, LOC104974620                                                                                                                                                                                                                                                                                                                                                                                                                                               |
| 17 | 47206627 | 47417244 | 210618  | 3  | ADGRD1, RAN, TRNAW-CCA                                                                                                                                                                                                                                                                                                                                                                                                                                             |
| 17 | 49136770 | 49229676 | 92907   | 2  | TMEM132D                                                                                                                                                                                                                                                                                                                                                                                                                                                           |
| 17 | 49229676 | 49396026 | 166351  | 2  | GLT1D1, LOC101907645                                                                                                                                                                                                                                                                                                                                                                                                                                               |
| 17 | 62008520 | 62185923 | 177404  | 2  | TRNAG-CCC                                                                                                                                                                                                                                                                                                                                                                                                                                                          |
| 18 | 13832408 | 15288711 | 1456304 | 2  | ACSF3, ANKRD11, APRT, C18H16orf87, CBFA2T3, CDH15, CDK10, CDT1, CENPBD1, CHMP1A, CPNE7, CTU2, CYBA, DBNDD1, DEF8, DPEP1, FANCA, GALNS, GAS8, IL17C, LOC100296324, LOC101904595, LOC104974755, LOC104974758, LOC104974760, LOC104974835, LOC101713144, LOC517901, LOC532875, MC1R, MIR2327, MVD, MYLK3, ORC6, PABPN1L, PIEZO1, RNF166, RPL13, SHCBP1, SLC22A31, SNAI3, SPATA2L, SPATA33, SPG7, SPIRE2, TCF25, TRAPPC2L, TUBB3, VPS35, VPS9D1, ZC3H18, ZFPM1, ZNF276 |
| 18 | 15647931 | 15935247 | 287317  | 3  | ITFG1, NETO2                                                                                                                                                                                                                                                                                                                                                                                                                                                       |
| 18 | 16274612 | 18184433 | 1909822 | 2  | ABCC11, ABCC12, C18H16orf78, CBLN1, LOC104970029, LOC104974836, LOC522437, LOC533093, LONP2, N4BP1, SIAH1, ZNF423                                                                                                                                                                                                                                                                                                                                                  |
| 18 | 27272163 | 27369681 | 97519   | 2  | .                                                                                                                                                                                                                                                                                                                                                                                                                                                                  |
| 18 | 27369681 | 27864967 | 495287  | 2  | .                                                                                                                                                                                                                                                                                                                                                                                                                                                                  |
| 18 | 27864967 | 29389709 | 1524743 | 5  | LOC781392                                                                                                                                                                                                                                                                                                                                                                                                                                                          |
| 18 | 29639253 | 29660159 | 20907   | 2  | CDH8                                                                                                                                                                                                                                                                                                                                                                                                                                                               |
| 18 | 29660159 | 30072683 | 412525  | 2  | CDH8                                                                                                                                                                                                                                                                                                                                                                                                                                                               |
| 18 | 47287636 | 47658413 | 370778  | 4  | LOC100848226, LOC101907195, LOC101907883, LOC1017131425, LOC613546, ZFP14, ZFP82, ZNF382, ZNF461, ZNF566, ZNF585A, ZNF793, ZNF829                                                                                                                                                                                                                                                                                                                                  |
| 18 | 47658413 | 48152056 | 493644  | 3  | LOC101901900, LOC101908181, LOC1017131422, LOC509804, LOC519309, LOC524350, LOC787074, LOC787397, SIPA1L3, TRNAE-UUC, ZFP30, ZNF345, ZNF383, ZNF420, ZNF527, ZNF569, ZNF570                                                                                                                                                                                                                                                                                        |
| 18 | 48152056 | 48164032 | 11977   | 3  | SIPA1L3                                                                                                                                                                                                                                                                                                                                                                                                                                                            |
| 18 | 48164032 | 48429406 | 265375  | 3  | DPF1, LOC101902440, SIPA1L3                                                                                                                                                                                                                                                                                                                                                                                                                                        |
| 18 | 48429406 | 48530477 | 101072  | 2  | C18H19orf33, PPP1R14A, SPINT2, YIF1B                                                                                                                                                                                                                                                                                                                                                                                                                               |
| 18 | 52248566 | 52578498 | 329933  | 6  | CADM4, ETHE1, IRGQ, IRGQ, KCNN4, LOC100337113, LOC101909226, LOC104974883, LOC1017131429, LOC506634, LOC512005, LOC526915, LOC616722, LOC616860, LYPD5, PHLDB3, PLAUR, SMG9, SRRM5, XRCC1, ZNF428, ZNF575, ZNF576                                                                                                                                                                                                                                                  |
| 18 | 52578498 | 52604599 | 26102   | 4  | .                                                                                                                                                                                                                                                                                                                                                                                                                                                                  |
| 18 | 52604599 | 53080991 | 476393  | 5  | CEACAM20, IGSF23, LOC101903309, LOC104974888, LOC1017131431, LOC1017131433, LOC1017131442, LOC526865, LOC538686, ZNF180, ZNF226, ZNF227, ZNF233, ZNF235, ZNF283, ZNF285, ZNF404, ZNF45                                                                                                                                                                                                                                                                             |
| 18 | 57902581 | 57935903 | 33323   | 2  | LOC104974923, LOC1017131444                                                                                                                                                                                                                                                                                                                                                                                                                                        |
| 18 | 57935903 | 58245134 | 309232  | 9  | C18H19orf84, CLDND2, ETFB, IGLON5, LIM2, LOC100297056, LOC100300478, LOC104974925, LOC104974926, LOC1017131445, LOC1017131446, LOC1017133350, LOC506364, LOC512863, LOC614923, LOC618268, LOC786291, LOC789748, NKG7, SIGLEC10, TRNAG-CCC, VSIG10L, ZNF175                                                                                                                                                                                                         |

|    |          |          |        |    |                                                                                                                                                                                                                         |
|----|----------|----------|--------|----|-------------------------------------------------------------------------------------------------------------------------------------------------------------------------------------------------------------------------|
| 18 | 58245134 | 58479771 | 234638 | 5  | HAS1, LOC101907648, LOC101907942, LOC107131224, LOC107131449, LOC787309, LOC787554, MIR125A, MIR99B, MIRLET7E, ZNF350, ZNF432, ZNF613, ZNF614                                                                           |
| 18 | 58479771 | 58486961 | 7191   | 2  | LOC787309                                                                                                                                                                                                               |
| 18 | 59941353 | 60132763 | 191411 | 3  | LOC100299712, LOC100848077, LOC101907570, LOC101907718, LOC788019                                                                                                                                                       |
| 18 | 60372843 | 60519933 | 147091 | 2  | LOC100140226, LOC101903915, LOC107131455, LOC788150, LOC788599                                                                                                                                                          |
| 18 | 60519933 | 60810520 | 290588 | 4  | LOC100138666, LOC100139360, LOC101904879, LOC101905467, LOC101905616, LOC101909507, LOC104974934, LOC104974935, LOC104974936, LOC107131392, LOC107131456, LOC107131457, LOC531059, LOC788599, LOC788871, ZNF677, ZNF729 |
| 18 | 60810520 | 60943782 | 133263 | 20 | LOC104974937, LOC104974938, LOC104976942, LOC107131458, LOC616720, LOC618289, LOC782961, LOC785408, LOC786224                                                                                                           |
| 18 | 60943782 | 61024783 | 81002  | 23 | LOC101906283, LOC101906367, LOC101907390, LOC104968479, LOC788268, LOC788928                                                                                                                                            |
| 18 | 61024783 | 61093395 | 68613  | 21 | LOC101906367, LOC101907041, LOC101909040, LOC104970711, LOC107133353, LOC618456                                                                                                                                         |
| 18 | 61093395 | 61172232 | 78838  | 5  | LOC100336208, LOC100849068, LOC101902722, LOC104976972                                                                                                                                                                  |
| 18 | 61512254 | 61621892 | 109639 | 2  | LOC504704, LOC506868, LOC515600, LOC615600, LOC784517, MGC157082                                                                                                                                                        |
| 18 | 61621892 | 61720911 | 99020  | 8  | LOC101904080, LOC101904151, LOC511982, LOC513941, LOC527385, LOC784517, LOC785919, MGC157082                                                                                                                            |
| 18 | 61720911 | 61763855 | 42945  | 8  | LOC785919                                                                                                                                                                                                               |
| 18 | 61763855 | 61996635 | 232781 | 10 | LOC100337097, LOC101907900, LOC107131285, LOC510904, LOC517090, LOC528332, LOC528568, LOC617141, LOC618873, MGC138914                                                                                                   |
| 18 | 61996635 | 62223881 | 227247 | 5  | LOC100300449, LOC100300531, LOC100336759, LOC100848932, LOC510904, LOC514552, LOC518964, LOC525820, LOC618662                                                                                                           |
| 18 | 66159699 | 66344542 | 184844 | 10 | A1BG, CHMP2A, LOC100139764, LOC100847831, LOC100852286, LOC101903385, LOC101903649, LOC107133357, LOC107133358, MZF1, RPS5, SLC27A5, TRIM28, UBE2M, ZBTB45, ZNF132, ZNF324, ZNF446, ZNF584, ZSCAN22                     |
| 19 | 2147     | 234729   | 232583 | 7  | LOC107131482, LOC107131483, LOC524702, LOC531039, LOC788149, LOC789077                                                                                                                                                  |
| 19 | 234729   | 350370   | 115642 | 6  | LOC107131484, LOC107131485                                                                                                                                                                                              |
| 19 | 350370   | 977239   | 626870 | 6  | CA10, LOC101907572                                                                                                                                                                                                      |
| 19 | 977239   | 1006675  | 29437  | 5  | CA10                                                                                                                                                                                                                    |
| 19 | 1006675  | 1209662  | 202988 | 4  | CA10                                                                                                                                                                                                                    |
| 19 | 1209662  | 1215800  | 6139   | 6  | CA10                                                                                                                                                                                                                    |
| 19 | 1215800  | 1242159  | 26360  | 6  | CA10, TRNAS-GGA                                                                                                                                                                                                         |
| 19 | 1242159  | 1438254  | 196096 | 9  | CA10                                                                                                                                                                                                                    |
| 19 | 1438254  | 1605449  | 167196 | 6  | CA10                                                                                                                                                                                                                    |
| 19 | 1605449  | 1663957  | 58509  | 7  | .                                                                                                                                                                                                                       |
| 19 | 1663957  | 1860926  | 196970 | 8  | .                                                                                                                                                                                                                       |
| 19 | 1860926  | 1968160  | 107235 | 6  | LOC100138219                                                                                                                                                                                                            |
| 19 | 1968160  | 2067688  | 99529  | 4  | .                                                                                                                                                                                                                       |
| 19 | 2067688  | 2258739  | 191052 | 4  | .                                                                                                                                                                                                                       |
| 19 | 2258739  | 2295465  | 36727  | 5  | .                                                                                                                                                                                                                       |
| 19 | 2295465  | 2370243  | 74779  | 3  | .                                                                                                                                                                                                                       |
| 19 | 2370243  | 2617188  | 246946 | 5  | LOC785473                                                                                                                                                                                                               |
| 19 | 2617188  | 2678867  | 61680  | 3  | .                                                                                                                                                                                                                       |
| 19 | 2678867  | 2907092  | 228226 | 6  | .                                                                                                                                                                                                                       |
| 19 | 2907092  | 2935868  | 28777  | 6  | .                                                                                                                                                                                                                       |
| 19 | 2935868  | 2975907  | 40040  | 7  | .                                                                                                                                                                                                                       |
| 19 | 2975907  | 3200733  | 224827 | 6  | .                                                                                                                                                                                                                       |
| 19 | 3200733  | 3221986  | 21254  | 7  | .                                                                                                                                                                                                                       |
| 19 | 3221986  | 3487354  | 265369 | 5  | LOC100138652, LOC100141253, LOC100852304                                                                                                                                                                                |
| 19 | 3487354  | 3524717  | 37364  | 5  | .                                                                                                                                                                                                                       |
| 19 | 3524717  | 3695944  | 171228 | 2  | .                                                                                                                                                                                                                       |
| 19 | 3695944  | 3842129  | 146186 | 4  | .                                                                                                                                                                                                                       |
| 19 | 3842129  | 4335161  | 493033 | 4  | KIF2B                                                                                                                                                                                                                   |
| 19 | 4335161  | 4658226  | 323066 | 4  | LOC790351, LOC790354                                                                                                                                                                                                    |
| 19 | 5527395  | 5634182  | 106788 | 3  | STXBP4                                                                                                                                                                                                                  |
| 19 | 5634182  | 5783537  | 149356 | 2  | HLF, LOC781218                                                                                                                                                                                                          |
| 19 | 5941227  | 6043434  | 102208 | 2  | .                                                                                                                                                                                                                       |
| 19 | 6043434  | 6223690  | 180257 | 3  | LOC100139255                                                                                                                                                                                                            |
| 19 | 7707386  | 8199646  | 492261 | 2  | C19H17orf67, COIL, DGKE, LOC101904010, LOC107131487, LOC784678, NOG, SCPEP1, TRIM25                                                                                                                                     |
| 19 | 8942697  | 9405202  | 462506 | 3  | CUEDC1, DYNLL2, LOC101905090, LOC104974989, LOC107131488, LOC508468, LOC512973, LOC514828, LOC788693, LOC788704, MRPS23, OR4D2, SRSF1, VEZF1                                                                            |
| 19 | 9928248  | 10814694 | 886447 | 2  | GDPD1, LOC100847304, LOC101906048, LOC107131490, LOC539693, MGC137055, MIR301A, MIR454, PPM1E, PRR11, RAD51C, SKA2, SMG8, TEX14, TRIM37, TRNAE-UUC, YPEL2                                                               |
| 19 | 10814694 | 11578231 | 763538 | 2  | CLTC, DHX40, INTS2, LOC101907677, LOC104968960, LOC104968971, LOC107131490, LOC107131491, MED13, MIR21, PTRH2, RNFT1, RPS6KB1, TUBD1, VMP1                                                                              |
| 19 | 12683013 | 12953193 | 270181 | 3  | APPBP2, C19H17orf64, LOC100295130, LOC101905169, LOC107131501, PPM1D                                                                                                                                                    |
| 19 | 12953193 | 13495359 | 542167 | 3  | CA4, DHRS11, GGNBP2, LOC101903622, LOC101905618, LOC104970422, LOC107131496, LOC783641, MRM1, MYO19, PIGW, USP32, ZNHIT3                                                                                                |
| 19 | 17984796 | 18336722 | 351927 | 2  | C19H17orf75, CDK5R1, LOC101903704, MYO1D, PSMD11, RHBDL3, TRNAQ-UUG, ZNF207                                                                                                                                             |
| 19 | 18336722 | 18798317 | 461596 | 4  | ADAP2, ATAD5, COPRS, CRLF3, LOC101902800, LOC107131499, MIR2332, RHOT1, RNF135, SUZ12, TEFM, UTP6                                                                                                                       |
| 19 | 18798317 | 19059067 | 260751 | 4  | LOC107131500, MIR193A, MIR2333, MIR365-2, RAB11FIP4, TRNAT-CGU                                                                                                                                                          |
| 19 | 19059067 | 19255530 | 196464 | 3  | EV12A, EV12B, LOC101903070, NF1, OMG                                                                                                                                                                                    |
| 19 | 19639375 | 19941401 | 302027 | 5  | KSR1, LGALS9, LOC100848006, LOC101904699, LOC101904856, LOC104976580, LOC785307, NOS2, TRNAR-CCU                                                                                                                        |
| 19 | 19941401 | 19995708 | 54308  | 4  | LOC783508, LOC785589, RAET1L                                                                                                                                                                                            |

|    |          |          |         |    |                                                                                                                                                                                                                                                                                                                                                                                                                                                                    |
|----|----------|----------|---------|----|--------------------------------------------------------------------------------------------------------------------------------------------------------------------------------------------------------------------------------------------------------------------------------------------------------------------------------------------------------------------------------------------------------------------------------------------------------------------|
| 19 | 23623512 | 24897425 | 1273914 | 2  | CLUH, DPH1, HIC1, LOC100336161, LOC101901928, LOC101902679, LOC101906154, LOC101906737, LOC508307, LOC508980, LOC509525, LOC509526, LOC511509, LOC515540, LOC517569, LOC520835, LOC522582, LOC523547, LOC526294, LOC532238, LOC538966, LOC540082, LOC615901, LOC617122, LOC618112, LOC618124, LOC618593, LOC786951, LOC787076, METTL16, MIR132, MIR212, MIR2337, MNT, OR1D5, OR1E1, OR1G1, OR3A1, OVCA2, PAFAH1B1, RAP1GAP2, RPA1, RTN4RL1, SGSM2, SMG6, SRR, TSR1 |
| 19 | 45202558 | 45359898 | 157341  | 2  | ADAM11, CCDC43, DBF4B, GJC1, MEIOC                                                                                                                                                                                                                                                                                                                                                                                                                                 |
| 19 | 45359898 | 45373471 | 13574   | 2  | GJC1                                                                                                                                                                                                                                                                                                                                                                                                                                                               |
| 19 | 45373471 | 45797855 | 424385  | 2  | ACBD4, C1QL1, CCDC103, DCAKD, EFTUD2, FMNL1, GFAP, GJC1, HEXIM1, HEXIM2, HIGD1B, KIF18B, LOC101903790, LOC104975097, LOC104975099, LOC614821, MAP3K14, MIR2343, NMT1, PLCD3, SPATA32                                                                                                                                                                                                                                                                               |
| 19 | 52356802 | 53209634 | 852833  | 8  | AATK, BAIAP2, CHMP6, ENDOV, LOC101902772, LOC509283, LOC512869, MIR338, NPTX1, RPTOR, TRNAG-CCC                                                                                                                                                                                                                                                                                                                                                                    |
| 19 | 53209634 | 53920430 | 710797  | 4  | CARD14, CBX2, CBX4, CBX8, CCDC40, EIF4A3, ENPP7, GAA, LOC101907000, LOC101907247, LOC512869, RBFOX3, SGSH, SLC26A11, TBC1D16                                                                                                                                                                                                                                                                                                                                       |
| 19 | 60980442 | 61386245 | 405804  | 2  | LOC104975159                                                                                                                                                                                                                                                                                                                                                                                                                                                       |
| 19 | 61386245 | 61518606 | 132362  | 4  | KCNJ16, KCNJ2, LOC104975162                                                                                                                                                                                                                                                                                                                                                                                                                                        |
| 19 | 61518606 | 61664949 | 146344  | 2  | LOC100848333, LOC107131547                                                                                                                                                                                                                                                                                                                                                                                                                                         |
| 19 | 61664949 | 62170451 | 505503  | 2  | ABCA5, LOC104975164, MAP2K6                                                                                                                                                                                                                                                                                                                                                                                                                                        |
| 19 | 62170451 | 62268200 | 97750   | 12 | ABCA10, ABCA5, ABCA6, LOC100848794                                                                                                                                                                                                                                                                                                                                                                                                                                 |
| 19 | 62268200 | 62466977 | 198778  | 10 | ABCA6, ABCA9, LOC107131548, MGC134105                                                                                                                                                                                                                                                                                                                                                                                                                              |
| 20 | 1649     | 136642   | 134994  | 9  | LOC100300814, LOC100300861, LOC107133371, LOC614697, LOC618225, LOC784595                                                                                                                                                                                                                                                                                                                                                                                          |
| 20 | 136642   | 567257   | 430616  | 7  | LOC784724, MIR103-1, MIR218-2, PANK3, SLIT3, SPZ1                                                                                                                                                                                                                                                                                                                                                                                                                  |
| 20 | 5855837  | 6286905  | 431069  | 2  | LOC785458, MIR584-6                                                                                                                                                                                                                                                                                                                                                                                                                                                |
| 20 | 11055524 | 11300934 | 245411  | 2  | LOC101902212                                                                                                                                                                                                                                                                                                                                                                                                                                                       |
| 20 | 11300934 | 11608135 | 307202  | 2  | PIK3R1                                                                                                                                                                                                                                                                                                                                                                                                                                                             |
| 20 | 15112617 | 15287906 | 175290  | 2  | LOC107131560, RNF180                                                                                                                                                                                                                                                                                                                                                                                                                                               |
| 20 | 15287906 | 15536194 | 248289  | 2  | MIR320A-2, RNF180                                                                                                                                                                                                                                                                                                                                                                                                                                                  |
| 20 | 15536194 | 15570780 | 34587   | 3  | .                                                                                                                                                                                                                                                                                                                                                                                                                                                                  |
| 20 | 15570780 | 15741286 | 170507  | 3  | HTR1A                                                                                                                                                                                                                                                                                                                                                                                                                                                              |
| 20 | 15741286 | 15787696 | 46411   | 3  | .                                                                                                                                                                                                                                                                                                                                                                                                                                                                  |
| 20 | 15787696 | 15828064 | 40369   | 2  | .                                                                                                                                                                                                                                                                                                                                                                                                                                                                  |
| 20 | 15828064 | 16018176 | 190113  | 2  | LOC104975226                                                                                                                                                                                                                                                                                                                                                                                                                                                       |
| 20 | 17565117 | 17832309 | 267193  | 2  | LOC104975232, LOC107131561, LOC781741, TRNAG-CCC                                                                                                                                                                                                                                                                                                                                                                                                                   |
| 20 | 17832309 | 18367785 | 535477  | 3  | LOC100850100, LOC101907741, LOC104975230, LOC104975233, LOC107131409, MIR2889, NDUFAF2, ZSWIM6                                                                                                                                                                                                                                                                                                                                                                     |
| 20 | 18438071 | 19483000 | 1044930 | 2  | DEPDC1B, ELOVL7, ERCC8, LOC100848933, LOC101903569, LOC104975237, LOC107131563, LOC107131564, NDUFAF2, PDE4D                                                                                                                                                                                                                                                                                                                                                       |
| 20 | 27418100 | 27971314 | 553215  | 3  | ISL1                                                                                                                                                                                                                                                                                                                                                                                                                                                               |
| 20 | 28685366 | 29009151 | 323786  | 3  | EMB, LOC104975257, LOC104975258, LOC785429                                                                                                                                                                                                                                                                                                                                                                                                                         |
| 20 | 32031953 | 32204927 | 172975  | 2  | GHR                                                                                                                                                                                                                                                                                                                                                                                                                                                                |
| 20 | 32204927 | 32459668 | 254742  | 5  | LOC104975266, LOC104975269                                                                                                                                                                                                                                                                                                                                                                                                                                         |
| 20 | 32459668 | 32654935 | 195268  | 8  | .                                                                                                                                                                                                                                                                                                                                                                                                                                                                  |
| 20 | 32654935 | 32834649 | 179715  | 7  | FBXO4, OXCT1                                                                                                                                                                                                                                                                                                                                                                                                                                                       |
| 20 | 32834649 | 33238498 | 403850  | 3  | OXCT1, PLCXD3, TRNAY-GUA                                                                                                                                                                                                                                                                                                                                                                                                                                           |
| 20 | 41068096 | 41207419 | 139324  | 2  | LOC104975283, NPR3                                                                                                                                                                                                                                                                                                                                                                                                                                                 |
| 20 | 41207419 | 41244125 | 36707   | 2  | .                                                                                                                                                                                                                                                                                                                                                                                                                                                                  |
| 20 | 41244125 | 41600868 | 356744  | 2  | MTMR12, SUB1, TRNAG-CCC, ZFR                                                                                                                                                                                                                                                                                                                                                                                                                                       |
| 20 | 41600868 | 41886874 | 286007  | 2  | GOLPH3, LOC107131574, LOC614117, PDZD2, TRNAW-CCA                                                                                                                                                                                                                                                                                                                                                                                                                  |
| 20 | 46908310 | 47592275 | 683966  | 2  | CDH9                                                                                                                                                                                                                                                                                                                                                                                                                                                               |
| 20 | 47592275 | 48062009 | 469735  | 2  | LOC104975285, TRNAC-ACA, TRNAS-GGA                                                                                                                                                                                                                                                                                                                                                                                                                                 |
| 20 | 48410738 | 48725491 | 314754  | 2  | .                                                                                                                                                                                                                                                                                                                                                                                                                                                                  |
| 20 | 48725491 | 48990997 | 265507  | 2  | TRNAF-AAA                                                                                                                                                                                                                                                                                                                                                                                                                                                          |
| 20 | 48990997 | 49596686 | 605690  | 6  | CDH10, LOC100138662, LOC786112                                                                                                                                                                                                                                                                                                                                                                                                                                     |
| 20 | 49596686 | 49708820 | 112135  | 4  | LOC101904270                                                                                                                                                                                                                                                                                                                                                                                                                                                       |
| 20 | 49708820 | 49734301 | 25482   | 3  | LOC101904270                                                                                                                                                                                                                                                                                                                                                                                                                                                       |
| 20 | 49734301 | 49879328 | 145028  | 3  | .                                                                                                                                                                                                                                                                                                                                                                                                                                                                  |
| 20 | 49879328 | 49912827 | 33500   | 2  | .                                                                                                                                                                                                                                                                                                                                                                                                                                                                  |
| 20 | 50495201 | 51167558 | 672358  | 2  | LOC100137772, TRNAC-GCA                                                                                                                                                                                                                                                                                                                                                                                                                                            |
| 20 | 51844216 | 52189222 | 345007  | 5  | TRNAC-GCA                                                                                                                                                                                                                                                                                                                                                                                                                                                          |
| 20 | 52189222 | 52440810 | 251589  | 4  | .                                                                                                                                                                                                                                                                                                                                                                                                                                                                  |
| 20 | 52440810 | 52783961 | 343152  | 2  | .                                                                                                                                                                                                                                                                                                                                                                                                                                                                  |
| 20 | 52831099 | 52947521 | 116423  | 2  | TRNAC-GCA                                                                                                                                                                                                                                                                                                                                                                                                                                                          |
| 20 | 52947521 | 53226746 | 279226  | 2  | LOC781924                                                                                                                                                                                                                                                                                                                                                                                                                                                          |
| 20 | 53226746 | 53317918 | 91173   | 4  | .                                                                                                                                                                                                                                                                                                                                                                                                                                                                  |
| 20 | 53656285 | 53759278 | 102994  | 2  | CDH18                                                                                                                                                                                                                                                                                                                                                                                                                                                              |
| 20 | 53759278 | 53899669 | 140392  | 2  | CDH18                                                                                                                                                                                                                                                                                                                                                                                                                                                              |
| 20 | 53899669 | 54253902 | 354234  | 2  | CDH18                                                                                                                                                                                                                                                                                                                                                                                                                                                              |
| 20 | 54253902 | 54284742 | 30841   | 2  | .                                                                                                                                                                                                                                                                                                                                                                                                                                                                  |
| 20 | 54284742 | 54747417 | 462676  | 2  | .                                                                                                                                                                                                                                                                                                                                                                                                                                                                  |
| 20 | 54747417 | 54968067 | 220651  | 3  | LOC781508                                                                                                                                                                                                                                                                                                                                                                                                                                                          |
| 20 | 55084351 | 55407826 | 323476  | 2  | .                                                                                                                                                                                                                                                                                                                                                                                                                                                                  |
| 20 | 55407826 | 55694535 | 286710  | 3  | LOC101905359, LOC784462                                                                                                                                                                                                                                                                                                                                                                                                                                            |
| 20 | 55694535 | 55892478 | 197944  | 2  | LOC101905359, LOC516790                                                                                                                                                                                                                                                                                                                                                                                                                                            |
| 20 | 55964327 | 56159139 | 194813  | 2  | LOC100849014, LOC107131579                                                                                                                                                                                                                                                                                                                                                                                                                                         |
| 20 | 56159139 | 56705905 | 546767  | 7  | BASP1, LOC100849043, MYO10                                                                                                                                                                                                                                                                                                                                                                                                                                         |
| 20 | 56705905 | 56912867 | 206963  | 8  | MYO10                                                                                                                                                                                                                                                                                                                                                                                                                                                              |
| 20 | 56912867 | 57453246 | 540380  | 6  | FAM134B, MARCH11, TRNAC-ACA, ZNF622                                                                                                                                                                                                                                                                                                                                                                                                                                |
| 20 | 58368032 | 59487392 | 1119361 | 2  | ANKH, DNAH5, FAM105A, LOC104969091, LOC107131578, LOC107131580, LOC107131581, OTULIN, TRIO, TRNAC-ACA, TRNAG-CCC, TRNAG-UCC                                                                                                                                                                                                                                                                                                                                        |
| 20 | 59612259 | 59666404 | 54146   | 6  | DNAH5                                                                                                                                                                                                                                                                                                                                                                                                                                                              |
| 20 | 59666404 | 59980110 | 313707  | 4  | DNAH5                                                                                                                                                                                                                                                                                                                                                                                                                                                              |
| 20 | 59980110 | 60144977 | 164868  | 3  | .                                                                                                                                                                                                                                                                                                                                                                                                                                                                  |
| 20 | 60144977 | 60458957 | 313981  | 4  | .                                                                                                                                                                                                                                                                                                                                                                                                                                                                  |
| 20 | 60458957 | 60530815 | 71859   | 5  | LOC101902130                                                                                                                                                                                                                                                                                                                                                                                                                                                       |

|    |          |          |         |    |                                                                                                                                                                                                                                                                                                                                              |
|----|----------|----------|---------|----|----------------------------------------------------------------------------------------------------------------------------------------------------------------------------------------------------------------------------------------------------------------------------------------------------------------------------------------------|
| 20 | 60530815 | 60566284 | 35470   | 5  | .                                                                                                                                                                                                                                                                                                                                            |
| 20 | 60566284 | 60740238 | 173955  | 6  | .                                                                                                                                                                                                                                                                                                                                            |
| 20 | 60740238 | 60965332 | 225095  | 5  | .                                                                                                                                                                                                                                                                                                                                            |
| 20 | 60965332 | 61030254 | 64923   | 3  | .                                                                                                                                                                                                                                                                                                                                            |
| 20 | 61030254 | 61155431 | 125178  | 3  | LOC781723                                                                                                                                                                                                                                                                                                                                    |
| 20 | 64218498 | 64327876 | 109379  | 2  | SEMA5A                                                                                                                                                                                                                                                                                                                                       |
| 20 | 64327876 | 64439336 | 111461  | 5  | SEMA5A                                                                                                                                                                                                                                                                                                                                       |
| 20 | 64439336 | 64949906 | 510571  | 4  | LOC104975291, SEMA5A, TRNAC-GCA                                                                                                                                                                                                                                                                                                              |
| 20 | 64949906 | 65245654 | 295749  | 3  | .                                                                                                                                                                                                                                                                                                                                            |
| 20 | 65245654 | 65736415 | 490762  | 2  | C20H5orf49, FASTKD3, MTRR                                                                                                                                                                                                                                                                                                                    |
| 21 | 3715289  | 3923973  | 208685  | 2  | .                                                                                                                                                                                                                                                                                                                                            |
| 21 | 3923973  | 3951064  | 27092   | 2  | .                                                                                                                                                                                                                                                                                                                                            |
| 21 | 4133215  | 5427363  | 1294149 | 4  | GABRA5, GABRB3, GABRG3, LOC783909, LOC789997, VIMP                                                                                                                                                                                                                                                                                           |
| 21 | 19934161 | 20172946 | 238786  | 6  | AEN, DET1, ISG20, LOC101903487, LOC101903572, LOC107131588, LOC107131596, LOC522763, LOC616063, LOC781624, LOC781745, MIR1179, MIR7-1, MRPS11                                                                                                                                                                                                |
| 21 | 20345887 | 20412002 | 66116   | 4  | LOC100301248, LOC107133375                                                                                                                                                                                                                                                                                                                   |
| 21 | 20412002 | 20503861 | 91860   | 6  | LOC101906218, LOC107131597, LOC508153, LOC520626, LOC522540, LOC782682                                                                                                                                                                                                                                                                       |
| 21 | 20503861 | 20628594 | 124734  | 7  | LOC100298625, LOC100298937, LOC100336774, LOC100848921, LOC508153, LOC526148, LOC526149, LOC613992                                                                                                                                                                                                                                           |
| 21 | 20628594 | 20638709 | 10116   | 5  | LOC100298937, LOC100336807                                                                                                                                                                                                                                                                                                                   |
| 21 | 34781428 | 35665666 | 884239  | 2  | CCDC33, CYP11A1, GZMB, ISLR, ISLR2, LOC100139881, LOC101903457, LOC104969313, LOC104969321, LOC104969340, LOC104975377, LOC107131612, LOC505326, LOC505658, LOC508646, LOC508858, LOC509956, LOC540321, LOC617313, LOC618420, LOC786126, LOC788565, LOC788601, LOC788612, LOXL1, PML, STOML1, STRA6, STXBP6                                  |
| 21 | 54259170 | 54516492 | 257323  | 2  | LOC101905447                                                                                                                                                                                                                                                                                                                                 |
| 22 | 3322     | 74405    | 71084   | 13 | LOC528613, LOC787303, LOC787323, LOC787350, LOC787369, LOC787388                                                                                                                                                                                                                                                                             |
| 22 | 74405    | 268600   | 194196  | 12 | LOC100336401, MRPS24, URGCP                                                                                                                                                                                                                                                                                                                  |
| 22 | 268600   | 426619   | 158020  | 11 | DBNL, LOC107131641, LOC107131642, LOC107131643, PGAM2, UBE2D4                                                                                                                                                                                                                                                                                |
| 22 | 426619   | 652885   | 226267  | 13 | LOC107131640, VOPP1                                                                                                                                                                                                                                                                                                                          |
| 22 | 652885   | 768616   | 115732  | 9  | LANCL2, VOPP1                                                                                                                                                                                                                                                                                                                                |
| 22 | 768616   | 771967   | 3352    | 8  | .                                                                                                                                                                                                                                                                                                                                            |
| 22 | 771967   | 1252901  | 480935  | 7  | EGFR                                                                                                                                                                                                                                                                                                                                         |
| 22 | 2363503  | 2611085  | 247583  | 6  | .                                                                                                                                                                                                                                                                                                                                            |
| 22 | 2611085  | 2644499  | 33415   | 4  | .                                                                                                                                                                                                                                                                                                                                            |
| 22 | 2644499  | 2908080  | 263582  | 5  | AZ12, CMC1, ZCWPW2                                                                                                                                                                                                                                                                                                                           |
| 22 | 2908080  | 2953514  | 45435   | 3  | ZCWPW2                                                                                                                                                                                                                                                                                                                                       |
| 22 | 2953514  | 3042272  | 88759   | 2  | ZCWPW2                                                                                                                                                                                                                                                                                                                                       |
| 22 | 3042272  | 3237872  | 195601  | 2  | LOC100336827, LOC104975474                                                                                                                                                                                                                                                                                                                   |
| 22 | 7598600  | 7750191  | 151592  | 4  | CRTAP, FBXL2, SUSD5                                                                                                                                                                                                                                                                                                                          |
| 22 | 7750191  | 8265974  | 515784  | 2  | CLASP2, FBXL2, LOC101908214, LOC107131651, LOC785477, PDCD6IP, UBP1                                                                                                                                                                                                                                                                          |
| 22 | 9674277  | 9915148  | 240872  | 4  | ARPP21, MIR128-2                                                                                                                                                                                                                                                                                                                             |
| 22 | 9915148  | 10586146 | 670999  | 8  | LOC100848011, LOC104975489, LOC107131652, LRRFIP2, MLH1, STAC                                                                                                                                                                                                                                                                                |
| 22 | 10586146 | 12623547 | 2037402 | 2  | ACAA1, ACVR2B, C22H3orf35, CSRNP1, CTDSP1, DCLK3, DLEC1, EPM2AIP1, EXOG, GOLGA4, GORASP1, ITGA9, LOC101902747, LOC104975491, LOC104975492, LOC104976677, LOC107131653, LOC107131654, LOC107131655, MIR2367, MIR26A-1, MIR26C, MLH1, MYD88, OXSR1, PLCD1, SCN10A, SCN11A, SCN5A, SLC22A13, SLC22A14, TRANK1, TTC21A, VILL, WDR48, XIRP1, XYLB |
| 22 | 13738652 | 13804799 | 66148   | 2  | .                                                                                                                                                                                                                                                                                                                                            |
| 22 | 13804799 | 14058262 | 253464  | 4  | CTNNB1, LOC104975498, ULK4                                                                                                                                                                                                                                                                                                                   |
| 22 | 14058262 | 14136802 | 78541   | 3  | ULK4                                                                                                                                                                                                                                                                                                                                         |
| 22 | 14136802 | 14212799 | 75998   | 5  | ULK4                                                                                                                                                                                                                                                                                                                                         |
| 22 | 14212799 | 14218615 | 5817    | 4  | ULK4                                                                                                                                                                                                                                                                                                                                         |
| 22 | 14218615 | 14287814 | 69200   | 6  | ULK4                                                                                                                                                                                                                                                                                                                                         |
| 22 | 14287814 | 14300245 | 12432   | 5  | ULK4                                                                                                                                                                                                                                                                                                                                         |
| 22 | 14300245 | 14451203 | 150959  | 4  | ULK4                                                                                                                                                                                                                                                                                                                                         |
| 22 | 14451203 | 14463775 | 12573   | 6  | ULK4                                                                                                                                                                                                                                                                                                                                         |
| 22 | 14463775 | 15045625 | 581851  | 9  | ABHD5, LOC104975501, LOC107131657, LOC539893, LOC784464, MIR138-1, ULK4                                                                                                                                                                                                                                                                      |
| 22 | 15045625 | 15417962 | 372338  | 4  | CCK, LOC107131659, LYZL4, SEC22C, TRAK1, ULK4, VIPR1                                                                                                                                                                                                                                                                                         |
| 22 | 15417962 | 15484840 | 66879   | 4  | NKTR, SS18L2                                                                                                                                                                                                                                                                                                                                 |
| 22 | 15484840 | 15703484 | 218645  | 2  | ACKR2, CCDC13, CYP8B1, HHATL, HIGD1A, KLHL40, LOC101905008, LOC101905143, LOC107133382, NKTR, TRNAG-CCC, ZBTB47                                                                                                                                                                                                                              |
| 22 | 16224164 | 16462998 | 238835  | 4  | LOC101902415, LOC101902478, LOC101905720, LOC782599, TCAIM, TOPAZ1, ZNF445                                                                                                                                                                                                                                                                   |
| 22 | 16462998 | 16564727 | 101730  | 3  | LOC107131645, LOC107131660, ZKSCAN7, ZNF197, ZNF445, ZNF852                                                                                                                                                                                                                                                                                  |
| 22 | 16564727 | 17183754 | 619028  | 4  | ARPC4, BRK1, BRPF1, CAMK1, CIDEA, CPNE9, CRELD1, EMC3, FANCD2, FANCD2OS, IL17RC, IL17RE, IRAK2, JAGN1, KIAA1143, KIF15, LOC100139192, LOC101905925, LOC101906342, LOC101906632, LOC104975513, MTMR14, OGG1, PRRT3, RPU5D3, TADA3, TATDN2, TTLL3, VHL, ZNF197, ZNF35, ZNF501, ZNF502                                                          |
| 22 | 18233976 | 18523669 | 289694  | 2  | .                                                                                                                                                                                                                                                                                                                                            |
| 22 | 18523669 | 18661254 | 137586  | 2  | LOC104975517                                                                                                                                                                                                                                                                                                                                 |
| 22 | 18681583 | 18917893 | 236311  | 3  | GRM7, LOC100848430, LOC107131663, LOC107131664                                                                                                                                                                                                                                                                                               |
| 22 | 20649816 | 20769316 | 119501  | 2  | .                                                                                                                                                                                                                                                                                                                                            |
| 22 | 20769316 | 21017031 | 247716  | 2  | .                                                                                                                                                                                                                                                                                                                                            |
| 22 | 26073690 | 26137576 | 63887   | 2  | .                                                                                                                                                                                                                                                                                                                                            |
| 22 | 26659289 | 26827642 | 168354  | 5  | LOC107131673                                                                                                                                                                                                                                                                                                                                 |
| 22 | 26827642 | 26945594 | 117953  | 7  | .                                                                                                                                                                                                                                                                                                                                            |
| 22 | 26945594 | 27266733 | 321140  | 5  | .                                                                                                                                                                                                                                                                                                                                            |
| 22 | 27266733 | 27339509 | 72777   | 5  | .                                                                                                                                                                                                                                                                                                                                            |
| 22 | 27698000 | 28243684 | 545685  | 3  | .                                                                                                                                                                                                                                                                                                                                            |
| 22 | 28243684 | 28480278 | 236595  | 2  | LOC104975536, PDZRN3                                                                                                                                                                                                                                                                                                                         |
| 22 | 29736780 | 30087423 | 350644  | 3  | .                                                                                                                                                                                                                                                                                                                                            |
| 22 | 33408973 | 34131131 | 722159  | 2  | FAM19A1, LOC101904222, SUCLG2                                                                                                                                                                                                                                                                                                                |
| 22 | 34131131 | 34405118 | 273988  | 5  | SUCLG2                                                                                                                                                                                                                                                                                                                                       |
| 22 | 38164998 | 38453092 | 288095  | 3  | LOC107131683, SYNPR                                                                                                                                                                                                                                                                                                                          |
| 22 | 38453092 | 39281442 | 828351  | 2  | C22H3orf14, CADPS, FEZF2, LOC101907894                                                                                                                                                                                                                                                                                                       |

|    |          |          |         |    |                                                                                                                                                                                                                                                                                                                                                                                                                                                      |
|----|----------|----------|---------|----|------------------------------------------------------------------------------------------------------------------------------------------------------------------------------------------------------------------------------------------------------------------------------------------------------------------------------------------------------------------------------------------------------------------------------------------------------|
| 22 | 40426318 | 40486781 | 60464   | 6  | PTPRG                                                                                                                                                                                                                                                                                                                                                                                                                                                |
| 22 | 40486781 | 40592853 | 106073  | 5  | PTPRG                                                                                                                                                                                                                                                                                                                                                                                                                                                |
| 22 | 40592853 | 40596824 | 3972    | 4  | .                                                                                                                                                                                                                                                                                                                                                                                                                                                    |
| 22 | 40596824 | 40627043 | 30220   | 3  | .                                                                                                                                                                                                                                                                                                                                                                                                                                                    |
| 22 | 40627043 | 40758848 | 131806  | 2  | FHIT                                                                                                                                                                                                                                                                                                                                                                                                                                                 |
| 22 | 40758848 | 41122513 | 363666  | 4  | FHIT                                                                                                                                                                                                                                                                                                                                                                                                                                                 |
| 22 | 41122513 | 41219530 | 97018   | 4  | FHIT                                                                                                                                                                                                                                                                                                                                                                                                                                                 |
| 22 | 44798294 | 45660995 | 862702  | 2  | ARHGEF3, CCDC66, ERC2, FAM208A, LOC104975557, MIR2371, TRNAG-UCC                                                                                                                                                                                                                                                                                                                                                                                     |
| 22 | 52512338 | 52911635 | 399298  | 3  | CSPG5, DHX30, ELP6, MAP4, SCAP, SMARCC1                                                                                                                                                                                                                                                                                                                                                                                                              |
| 22 | 52911635 | 53013368 | 101734  | 3  | PTPN23, SCAP                                                                                                                                                                                                                                                                                                                                                                                                                                         |
| 22 | 53013368 | 53345164 | 331797  | 3  | CCDC12, KIF9, KLHL18, LOC101906318, NBEAL2, NGP, NRADD, PTPN23, SETD2                                                                                                                                                                                                                                                                                                                                                                                |
| 22 | 53345164 | 53374549 | 29386   | 2  | PTH1R                                                                                                                                                                                                                                                                                                                                                                                                                                                |
| 22 | 60781533 | 61050040 | 268508  | 2  | LOC101905309, MCM2, PODXL2, TPRA1                                                                                                                                                                                                                                                                                                                                                                                                                    |
| 22 | 61050040 | 61320381 | 270342  | 4  | CHCHD6, PLXNA1                                                                                                                                                                                                                                                                                                                                                                                                                                       |
| 22 | 61320381 | 61679250 | 358870  | 3  | ALDH1L1, C22H3orf22, CFAP100, CHST13, KLF15, LOC101905897, LOC104975617, LOC107131704, LOC107131705, LOC107131706, SLC41A3, TXNRD3, UROC1, ZXDC                                                                                                                                                                                                                                                                                                      |
| 23 | 807      | 117408   | 116602  | 2  | .                                                                                                                                                                                                                                                                                                                                                                                                                                                    |
| 23 | 117408   | 330195   | 212788  | 3  | KHDRBS2                                                                                                                                                                                                                                                                                                                                                                                                                                              |
| 23 | 330195   | 569693   | 239499  | 4  | KHDRBS2                                                                                                                                                                                                                                                                                                                                                                                                                                              |
| 23 | 569693   | 661238   | 91546   | 4  | KHDRBS2                                                                                                                                                                                                                                                                                                                                                                                                                                              |
| 23 | 661238   | 746752   | 85515   | 4  | KHDRBS2                                                                                                                                                                                                                                                                                                                                                                                                                                              |
| 23 | 746752   | 850285   | 103534  | 4  | KHDRBS2                                                                                                                                                                                                                                                                                                                                                                                                                                              |
| 23 | 850285   | 902787   | 52503   | 2  | KHDRBS2                                                                                                                                                                                                                                                                                                                                                                                                                                              |
| 23 | 2289786  | 2690660  | 400875  | 4  | LOC100138918, PRIM2, TRNAC-ACA                                                                                                                                                                                                                                                                                                                                                                                                                       |
| 23 | 2690660  | 2742116  | 51457   | 4  | PRIM2                                                                                                                                                                                                                                                                                                                                                                                                                                                |
| 23 | 2742116  | 2876809  | 134694  | 4  | PRIM2                                                                                                                                                                                                                                                                                                                                                                                                                                                |
| 23 | 9866316  | 11055108 | 1188793 | 2  | BRPF3, C23H6orf222, C23H6orf89, CDKN1A, CPNE5, FGD2, KCTD20, LOC101907363, LOC101907794, LOC104975639, LOC104975643, LOC107131716, LOC520334, LOC618881, LOC790266, MAPK13, MAPK14, MTCH1, PI16, PNPLA1, PPI1, PXT1, RAB44, RPS4Y1, SLC26A8, SRSF3, STK38, TRNAE-UUC, TRNAG-CCC                                                                                                                                                                      |
| 23 | 11055108 | 11404700 | 349593  | 3  | CCDC167, CMTR1, LOC522610, PIM1, RNF8, TBC1D22B, TMEM217                                                                                                                                                                                                                                                                                                                                                                                             |
| 23 | 12116301 | 12812940 | 696640  | 3  | BTBD9, DNAH8, GLO1, LOC101904084, LOC781915                                                                                                                                                                                                                                                                                                                                                                                                          |
| 23 | 12995423 | 13534721 | 539299  | 2  | KCNK16, KCNK17, KCN5, LOC100139627, LOC104968668, LOC107131717, MIR2377, SAYSD1                                                                                                                                                                                                                                                                                                                                                                      |
| 23 | 20312066 | 21147506 | 835441  | 3  | ADGRF2, ADGRF4, CD2AP, LOC100296156, LOC107131722, OPN5, PTCHD4, TNFRSF21                                                                                                                                                                                                                                                                                                                                                                            |
| 23 | 21147506 | 21245035 | 97530   | 12 | .                                                                                                                                                                                                                                                                                                                                                                                                                                                    |
| 23 | 21245035 | 21370784 | 125750  | 12 | .                                                                                                                                                                                                                                                                                                                                                                                                                                                    |
| 23 | 21370784 | 21489661 | 118878  | 9  | .                                                                                                                                                                                                                                                                                                                                                                                                                                                    |
| 23 | 21489661 | 22187500 | 697840  | 3  | C23H6orf141, CENPQ, CRISP2, GLYATL3, LOC785693, MUT, RHAG                                                                                                                                                                                                                                                                                                                                                                                            |
| 23 | 22886516 | 23099335 | 212820  | 4  | TFAP2D                                                                                                                                                                                                                                                                                                                                                                                                                                               |
| 23 | 23099335 | 23224007 | 124673  | 3  | TFAP2B                                                                                                                                                                                                                                                                                                                                                                                                                                               |
| 23 | 24039816 | 24107037 | 67222   | 3  | PKHD1                                                                                                                                                                                                                                                                                                                                                                                                                                                |
| 23 | 24107037 | 24124395 | 17359   | 2  | PKHD1                                                                                                                                                                                                                                                                                                                                                                                                                                                |
| 23 | 24124395 | 24403162 | 278768  | 2  | IL17A, MIR133B, MIR206, PKHD1, TRNAG-CCC                                                                                                                                                                                                                                                                                                                                                                                                             |
| 23 | 24418110 | 24916401 | 498292  | 3  | EFHC1, GSTA2, IL17F, LOC100138641, LOC101906535, LOC107131727, LOC107131728, MCM3, PAQR8, TMEM14A, TRAM2                                                                                                                                                                                                                                                                                                                                             |
| 23 | 26892752 | 27138894 | 246143  | 2  | AGER, AGPAT1, ATF6B, EGFL8, FKBPL, LOC100138858, LOC101903877, LOC107131209, LOC615223, LOC786065, NOTCH4, PBX2, PPT2, PRRT1, RNF5                                                                                                                                                                                                                                                                                                                   |
| 23 | 27138894 | 27193097 | 54204   | 2  | LOC107131127, LOC107131209, TNXB                                                                                                                                                                                                                                                                                                                                                                                                                     |
| 23 | 27193097 | 27212778 | 19682   | 2  | TNXB                                                                                                                                                                                                                                                                                                                                                                                                                                                 |
| 23 | 27212778 | 27246043 | 33266   | 4  | CYP21, LOC101904057, LOC101904187, LOC617696, LOC781663, TNXB                                                                                                                                                                                                                                                                                                                                                                                        |
| 23 | 27246043 | 27261793 | 15751   | 6  | LOC617696                                                                                                                                                                                                                                                                                                                                                                                                                                            |
| 23 | 27261793 | 27727673 | 465881  | 8  | ABHD16A, AIF1, APOM, ATP6V1G2, BAG6, BoLA, C2, C23H6orf25, C23H6orf47, CFB, CLIC1, CSNK2B, DDAH2, DDX39B, DXO, EHMT2, GPANK1, HSPA1A, HSPA1L, LOC100139548, LOC100847561, LOC104975663, LOC107131731, LOC107133388, LOC107133390, LOC617696, LOC781796, LOC783502, LSM2, LST1, LTA, LTB, LY6G5B, LY6G5C, LY6G6C, LY6G6D, LY6G6E, LY6G6F, MCCD1, MGC126945, MSH5, NCR3, NELFE, NEU1, NFKBIL1, PRRC2A, SAPCD1, SLC44A4, STK19, TNF, VARS, VWA7, ZBTB12 |
| 23 | 27727673 | 27835871 | 108199  | 2  | BOLA, LOC788634, MIC1                                                                                                                                                                                                                                                                                                                                                                                                                                |
| 23 | 27961821 | 28535849 | 574029  | 3  | ABCF1, ATAT1, BOLA-NC1, C23H6orf136, DDR1, DHX16, DPCR1, FLOT1, GNL1, GTF2H4, IER3, LOC100847761, LOC101905956, LOC101906024, LOC104975665, LOC104975666, LOC104975667, LOC107131733, LOC107131734, LOC107133389, LOC512672, LOC614091, LOC615278, LOC787188, MDC1, MIR2378, MIR877, MRPS18B, MUC21, NRM, PPP1R10, PPP1R18, PRR3, RPP21, SFTA2, TUBB, VARS2                                                                                          |
| 23 | 29226041 | 29280403 | 54363   | 3  | LOC512579, LOC514434, LOC618034, LOC785431, OR12D3, OR5V1                                                                                                                                                                                                                                                                                                                                                                                            |
| 23 | 29280403 | 29504617 | 224215  | 7  | LOC107131736, LOC509155, LOC510530, LOC515704, LOC516273, LOC516274, LOC618052, LOC618064, LOC618070, LOC782262, LOC782301, LOC782341, LOC782379, LOC784557, LOC784614, LOC785162, LOC785252, LOC785277, LOC785479, OR14J1                                                                                                                                                                                                                           |
| 23 | 29504617 | 29576679 | 72063   | 8  | LOC528343, LOC784652, LOC784681                                                                                                                                                                                                                                                                                                                                                                                                                      |
| 23 | 29576679 | 29613713 | 37035   | 7  | LOC784787, OR2J3                                                                                                                                                                                                                                                                                                                                                                                                                                     |
| 23 | 29613713 | 29699728 | 86016   | 9  | LOC511103, LOC616517, LOC784858, LOC785760, LOC789358, LOC789367                                                                                                                                                                                                                                                                                                                                                                                     |
| 23 | 29699728 | 29787545 | 87818   | 10 | LOC509280, LOC618140, LOC788663, LOC788675, OR2J2, OR2W1                                                                                                                                                                                                                                                                                                                                                                                             |
| 23 | 29787545 | 29851107 | 63563   | 9  | LOC104970719, LOC107133391, OR2W1                                                                                                                                                                                                                                                                                                                                                                                                                    |
| 23 | 29851107 | 29914101 | 62995   | 11 | LOC107131741, LOC782475, LOC782554                                                                                                                                                                                                                                                                                                                                                                                                                   |
| 23 | 29914101 | 29934831 | 20731   | 11 | LOC107131741                                                                                                                                                                                                                                                                                                                                                                                                                                         |
| 23 | 29934831 | 30076786 | 141956  | 10 | LOC100847345, LOC101909685, LOC107131411, LOC784131, TRIM27, TRNAA-AGC, TRNAA-CGC, TRNAA-UGC, TRNAE-CUC, TRNAF-GAA, TRNAK-UUU, TRNAL-AAG, TRNAL-CAA, TRNAM-CAU, TRNAQ-CUG, TRNAR-CCG, ZNF311                                                                                                                                                                                                                                                         |
| 23 | 30076786 | 30240924 | 164139  | 2  | TRNAA-AGC, TRNAA-CGC, TRNAA-UGC, TRNAF-GAA, TRNAK-UUU, TRNAL-AAG, TRNAQ-UUG, TRNAS-GCU, TRNAT-AGU, TRNAT-CGU, ZSCAN12, ZSCAN31                                                                                                                                                                                                                                                                                                                       |

|    |          |          |         |    |                                                                                                                                                                                                                                                                                                                                                                                                                                                                                                                                                                                                                                                 |
|----|----------|----------|---------|----|-------------------------------------------------------------------------------------------------------------------------------------------------------------------------------------------------------------------------------------------------------------------------------------------------------------------------------------------------------------------------------------------------------------------------------------------------------------------------------------------------------------------------------------------------------------------------------------------------------------------------------------------------|
| 23 | 30240924 | 30525904 | 284981  | 4  | LOC104975673, LOC528914, LOC529518, LOC532291, LOC617979, NKAPL, PGBD1, TRNAS-GCU, ZKSCAN4, ZKSCAN8, ZNF165, ZNF389, ZSCAN16, ZSCAN26, ZSCAN9                                                                                                                                                                                                                                                                                                                                                                                                                                                                                                   |
| 23 | 30525904 | 30710207 | 184304  | 3  | LOC100337366, LOC100849008, LOC101904987, LOC518468, LOC526989, LOC528373, LOC615902, LOC616650, LOC616658, LOC616700, LOC619021, LOC783203, LOC783311, OR2B6                                                                                                                                                                                                                                                                                                                                                                                                                                                                                   |
| 23 | 30710207 | 30966347 | 256141  | 5  | HIST1H1B, HIST1H2AG, HIST1H2AJ, HIST1H2BB, HIST1H2BI, HIST1H3C, LOC100295221, LOC100847609, LOC101906102, LOC104968446, LOC104975676, LOC522315, LOC527645, LOC528329, LOC529277, LOC614970, LOC616819, LOC616868, LOC783002, LOC783041, MIR2379, TRNAA-AGC, TRNAD-GUC, TRNAF-GAA, TRNAG-GCC, TRNAI-AAU, TRNAI-UAU, TRNAK-UUU, TRNAL-CAA, TRNAL-UAA, TRNAM-CAU, TRNAQ-CUG, TRNAQ-UUG, TRNAR-ACG, TRNAR-UCU, TRNAS-AGA, TRNAS-CGA, TRNAT-AGU, TRNAT-CGU, TRNAV-AAC                                                                                                                                                                               |
| 23 | 30966347 | 31006337 | 39991   | 3  | MIR7857, TRNAI-AAU, TRNAM-CAU, TRNAQ-CUG, TRNAR-ACG, TRNAS-AGA, TRNAS-GCU, TRNAS-UGA, TRNAV-CAC                                                                                                                                                                                                                                                                                                                                                                                                                                                                                                                                                 |
| 23 | 31006337 | 31091923 | 85587   | 2  | TRNAC-GCA, TRNAD-GUC, TRNAQ-CUG, TRNAS-AGA, TRNAS-GCU, TRNAS-UGA, TRNAV-UAC, ZNF184, ZNF391                                                                                                                                                                                                                                                                                                                                                                                                                                                                                                                                                     |
| 23 | 31429004 | 32375669 | 946666  | 4  | BTN1A1, BTN2A1, BTN3A3, H2B, H4, HFE, HIST1H1A, HIST1H1C, HIST1H1D, HIST1H1E, HIST1H2AA, HIST1H2AC, HIST1H2AM, HIST1H2BA, HIST1H2BB, HIST1H2BD, HIST1H2BM, HIST1H3G, HIST1H3I, LOC100848369, LOC104968456, LOC104968510, LOC104968768, LOC104975682, LOC104975683, LOC104975684, LOC104975686, LOC107131750, LOC107133392, LOC505183, LOC518961, LOC521580, LOC527388, LOC537017, LOC617875, LOC617905, LOC786706, LOC787237, LOC787269, LOC787465, LRRC16A, MIR6531, SCGN, SLC17A1, SLC17A2, SLC17A3, SLC17A4, TRIM38, TRNAG-GCC, TRNAI-AAU, TRNAL-AAG, TRNAM-CAU, TRNAQ-UUG, TRNAR-ACG, TRNAR-UCG, TRNAS-AGA, TRNAS-GCU, TRNAS-UGA, TRNAW-CCA |
| 23 | 33250104 | 33515885 | 265782  | 10 | DCDC2, LOC104975690, NRSN1                                                                                                                                                                                                                                                                                                                                                                                                                                                                                                                                                                                                                      |
| 23 | 33515885 | 34742999 | 1227115 | 2  | LOC100296918, LOC100298767, LOC100336278, LOC522180, LOC780995, LOC788801, PRP1, PRP2, PRP4, PRP6, PRP8                                                                                                                                                                                                                                                                                                                                                                                                                                                                                                                                         |
| 23 | 34742999 | 35401635 | 658637  | 5  | CSH2, LOC100336962, LOC615210, LOC787975, LOC787990, PRL, PRP-VII, PRP14, PRP3, PRP9                                                                                                                                                                                                                                                                                                                                                                                                                                                                                                                                                            |
| 23 | 35401635 | 35591864 | 190230  | 2  | HDGFL1, LOC104975692                                                                                                                                                                                                                                                                                                                                                                                                                                                                                                                                                                                                                            |
| 23 | 35591864 | 35695837 | 103974  | 3  | .                                                                                                                                                                                                                                                                                                                                                                                                                                                                                                                                                                                                                                               |
| 23 | 35695837 | 35973313 | 277477  | 2  | LOC100847951, LOC104975693, LOC788707, MIR2284C                                                                                                                                                                                                                                                                                                                                                                                                                                                                                                                                                                                                 |
| 23 | 35973313 | 36923152 | 949840  | 2  | CDKAL1, LOC100847951, LOC104968751, LOC104975694, LOC107131752, SOX4                                                                                                                                                                                                                                                                                                                                                                                                                                                                                                                                                                            |
| 23 | 44249893 | 44474396 | 224504  | 3  | HIVEP1, LOC107131758                                                                                                                                                                                                                                                                                                                                                                                                                                                                                                                                                                                                                            |
| 23 | 44474396 | 44578434 | 104039  | 3  | LOC104969821, LOC107131758                                                                                                                                                                                                                                                                                                                                                                                                                                                                                                                                                                                                                      |
| 23 | 47810101 | 48172325 | 362225  | 4  | CAGE1, DSP, LOC104969862, RIOK1, RREB1, SSR1, TRNAE-UUC                                                                                                                                                                                                                                                                                                                                                                                                                                                                                                                                                                                         |
| 23 | 48172325 | 48206866 | 34542   | 4  | .                                                                                                                                                                                                                                                                                                                                                                                                                                                                                                                                                                                                                                               |
| 23 | 48206866 | 48560728 | 353863  | 4  | LOC101902551, LOC101902683, LOC104969889, LY86                                                                                                                                                                                                                                                                                                                                                                                                                                                                                                                                                                                                  |
| 23 | 52505108 | 52683926 | 178819  | 2  | LOC100138976, LOC101909053, LOC101909723, LOC104970720, LOC104970721, LOC107133395, LOC532311, LOC613394, LOC781404, OR5M10                                                                                                                                                                                                                                                                                                                                                                                                                                                                                                                     |
| 24 | 328670   | 459908   | 131239  | 5  | LOC100298725, LOC100301465, LOC515622, LOC518218, LOC788429, LOC788445, LOC788455, LOC789923, LOC789929                                                                                                                                                                                                                                                                                                                                                                                                                                                                                                                                         |
| 24 | 459908   | 2216332  | 1756425 | 3  | ADNP2, ATP9B, CTDP1, HSBP1L1, KCNG2, LOC101902808, LOC101902953, LOC104975719, LOC107131769, LOC107131770, LOC515578, LOC529511, LOC788494, LOC789936, NFATC1, PARD6G, PQLC1, RBFA, SALL3, TRNAK-UUU, TXNL4A                                                                                                                                                                                                                                                                                                                                                                                                                                    |
| 24 | 2216332  | 2385938  | 169607  | 8  | LOC101903078                                                                                                                                                                                                                                                                                                                                                                                                                                                                                                                                                                                                                                    |
| 24 | 2385938  | 3647012  | 1261075 | 8  | GALR1, LOC100848212, LOC100848495, LOC101903290, LOC101904059, LOC104975721, MBP, ZNF236, ZNF516                                                                                                                                                                                                                                                                                                                                                                                                                                                                                                                                                |
| 24 | 6566552  | 7656498  | 1089947 | 2  | CD226, LOC101907394, LOC104975731, RTTN, SOCS6                                                                                                                                                                                                                                                                                                                                                                                                                                                                                                                                                                                                  |
| 24 | 7656498  | 8302723  | 646226  | 4  | CD226, DOK6, LOC101907606                                                                                                                                                                                                                                                                                                                                                                                                                                                                                                                                                                                                                       |
| 24 | 8302723  | 8323104  | 20382   | 5  | .                                                                                                                                                                                                                                                                                                                                                                                                                                                                                                                                                                                                                                               |
| 24 | 8323104  | 8478283  | 155180  | 5  | CCDC102B, LOC104975734                                                                                                                                                                                                                                                                                                                                                                                                                                                                                                                                                                                                                          |
| 24 | 8478283  | 8715370  | 237088  | 4  | CCDC102B                                                                                                                                                                                                                                                                                                                                                                                                                                                                                                                                                                                                                                        |
| 24 | 8715370  | 8954899  | 239530  | 2  | CCDC102B, LOC100337355, LOC107133396, TMX3                                                                                                                                                                                                                                                                                                                                                                                                                                                                                                                                                                                                      |
| 24 | 9982903  | 11016329 | 1033427 | 5  | CDH19                                                                                                                                                                                                                                                                                                                                                                                                                                                                                                                                                                                                                                           |
| 24 | 12870482 | 13110525 | 240044  | 3  | LOC100848171, LOC104976722, SYT4                                                                                                                                                                                                                                                                                                                                                                                                                                                                                                                                                                                                                |
| 24 | 13110525 | 13195539 | 85015   | 4  | LOC781724                                                                                                                                                                                                                                                                                                                                                                                                                                                                                                                                                                                                                                       |
| 24 | 13195539 | 13461018 | 265480  | 8  | .                                                                                                                                                                                                                                                                                                                                                                                                                                                                                                                                                                                                                                               |
| 24 | 13461018 | 14804731 | 1343714 | 10 | LOC781770, PIK3C3, TRNAC-ACA                                                                                                                                                                                                                                                                                                                                                                                                                                                                                                                                                                                                                    |
| 24 | 14804731 | 14986844 | 182114  | 8  | .                                                                                                                                                                                                                                                                                                                                                                                                                                                                                                                                                                                                                                               |
| 24 | 14986844 | 15251197 | 264354  | 5  | TRNAC-GCA                                                                                                                                                                                                                                                                                                                                                                                                                                                                                                                                                                                                                                       |
| 24 | 15251197 | 16436545 | 1185349 | 10 | LOC100140947, LOC783699                                                                                                                                                                                                                                                                                                                                                                                                                                                                                                                                                                                                                         |
| 24 | 16436545 | 16703323 | 266779  | 8  | .                                                                                                                                                                                                                                                                                                                                                                                                                                                                                                                                                                                                                                               |
| 24 | 16703323 | 17105354 | 402032  | 6  | LOC104975749                                                                                                                                                                                                                                                                                                                                                                                                                                                                                                                                                                                                                                    |
| 24 | 17105354 | 18808533 | 1703180 | 4  | LOC107131773, LOC505339, TRNAK-UUU, TRNAW-CCA                                                                                                                                                                                                                                                                                                                                                                                                                                                                                                                                                                                                   |
| 24 | 29404104 | 29509381 | 105278  | 6  | .                                                                                                                                                                                                                                                                                                                                                                                                                                                                                                                                                                                                                                               |
| 24 | 29509381 | 29869700 | 360320  | 7  | LOC782418                                                                                                                                                                                                                                                                                                                                                                                                                                                                                                                                                                                                                                       |
| 24 | 31899448 | 33256722 | 1357275 | 4  | CABYR, HRH4, IMPACT, LAMA3, LOC107131777, OSBPL1A, TRNAC-GCA, TTC39C, ZNF521                                                                                                                                                                                                                                                                                                                                                                                                                                                                                                                                                                    |
| 24 | 35045493 | 35561252 | 515760  | 2  | ABHD3, ESCO1, GREB1L, LOC100847265, LOC107133397, MGC133647, SNRPD1                                                                                                                                                                                                                                                                                                                                                                                                                                                                                                                                                                             |
| 24 | 49534282 | 49924926 | 390645  | 2  | C24H18orf32, DYM, LOC107131298, LOC509808, MIR2381, RPL17                                                                                                                                                                                                                                                                                                                                                                                                                                                                                                                                                                                       |
| 25 | 668      | 301100   | 300433  | 10 | FAM234A, HBA, HBA1, HBM, HBQ1, HBZ, IL9R, LOC100137913, LOC101906502, LOC789192, LUC7L, MPG, NPRL3, POLR3K, RGS11, RHBDF1, SNRNP25                                                                                                                                                                                                                                                                                                                                                                                                                                                                                                              |
| 25 | 301100   | 939905   | 638806  | 3  | ARHGDI3, AXIN1, C1QTNF8, C25H16orf13, CACNA1H, CAPN15, CCDC78, CHTF18, DECR2, FAM173A, FAM195A, FBXL16, GNG13, HAGHL, LMF1, LOC100139040, LOC104975822, LOC516108, LOC531296, METRN, MRPL28, MSLN, NARFL, NHLRC4, NME4, PDIA2, PIGQ, PRR35, RAB11FIP3, RAB40C, RHBDL1, RHOT2, RPUSD1, SOX8, SSTR5, STUB1, TEKT4, TMEM8A, TRNAG-CCC, WDR24, WDR90, WFIKK1                                                                                                                                                                                                                                                                                        |
| 25 | 8520122  | 8622964  | 102843  | 3  | GRIN2A, TRNAG-CCC                                                                                                                                                                                                                                                                                                                                                                                                                                                                                                                                                                                                                               |
| 25 | 18714140 | 18988244 | 274105  | 6  | ACSM3, DCUN1D3, ER12, LOC104975861, LOC107131813, LYRM1, MGC134577, MIR2384                                                                                                                                                                                                                                                                                                                                                                                                                                                                                                                                                                     |

|    |          |          |         |   |                                                                                                                                                                                                                                                                                                                                              |
|----|----------|----------|---------|---|----------------------------------------------------------------------------------------------------------------------------------------------------------------------------------------------------------------------------------------------------------------------------------------------------------------------------------------------|
| 25 | 18988244 | 19123369 | 135126  | 3 | LOC107131814, TRNAR-CCU                                                                                                                                                                                                                                                                                                                      |
| 25 | 21161644 | 21765543 | 603900  | 2 | COG7, DCTN5, EARS2, ERN2, NDUFAB1, PALB2, PLK1, SCNN1B, SCNN1G, UBFD1                                                                                                                                                                                                                                                                        |
| 25 | 23416757 | 23717648 | 300892  | 3 | LOC100296463                                                                                                                                                                                                                                                                                                                                 |
| 25 | 40648430 | 40894010 | 245581  | 6 | MIR2390, SDK1                                                                                                                                                                                                                                                                                                                                |
| 26 | 6554     | 613565   | 607012  | 4 | LOC100138850, LOC101903496, LOC104970047, LOC107131859, LOC107131861, LOC522322, LOC782168, LOC784314, LOC784380, LOC784465, LOC784714, LOC784751, OR5D18                                                                                                                                                                                    |
| 26 | 613565   | 868763   | 255199  | 2 | CISD1, IPMK, LOC107131860, UBE2D1                                                                                                                                                                                                                                                                                                            |
| 26 | 1582391  | 1812286  | 229896  | 2 | .                                                                                                                                                                                                                                                                                                                                            |
| 26 | 2805234  | 3281110  | 475877  | 3 | LOC785617, ZWINT                                                                                                                                                                                                                                                                                                                             |
| 26 | 3281110  | 3353881  | 72772   | 3 | .                                                                                                                                                                                                                                                                                                                                            |
| 26 | 6417140  | 6658589  | 241450  | 2 | LOC101907086, LOC615206                                                                                                                                                                                                                                                                                                                      |
| 26 | 6658589  | 7214659  | 556071  | 4 | DKK1, PRKG1                                                                                                                                                                                                                                                                                                                                  |
| 26 | 7214659  | 7301637  | 86979   | 4 | PRKG1                                                                                                                                                                                                                                                                                                                                        |
| 26 | 7301637  | 7524860  | 223224  | 2 | PRKG1, TRNAQ-CUG                                                                                                                                                                                                                                                                                                                             |
| 26 | 7524860  | 7611087  | 86228   | 2 | CSTF2T, PRKG1                                                                                                                                                                                                                                                                                                                                |
| 26 | 8765310  | 9181088  | 415779  | 2 | LOC104975938, SGMS1                                                                                                                                                                                                                                                                                                                          |
| 26 | 16329919 | 16442455 | 112537  | 2 | CYP2C19, LOC505468                                                                                                                                                                                                                                                                                                                           |
| 26 | 16762406 | 17622790 | 860385  | 2 | ALDH18A1, BLNK, C26H10orf131, CC2D2B, CCNJ, DNNT, ENTPD1, LOC100848660, LOC101903321, LOC101903400, LOC101903992, LOC104975956, LOC107131876, LOC525649, SORBS1, TCTN3, ZNF518A                                                                                                                                                              |
| 26 | 25315262 | 25819181 | 503920  | 5 | CFAP58, LOC104975980, LOC104975981, LOC104975982, MIR2393, SORCS3                                                                                                                                                                                                                                                                            |
| 26 | 31758403 | 32313440 | 555038  | 2 | ADRA2A, BBIP1, LOC100852061, LOC101906327, LOC107131889, MIR4680, MIR6524, PDCD4, RBM20, SHOC2                                                                                                                                                                                                                                               |
| 26 | 35714685 | 35972066 | 257382  | 4 | FAM160B1, TRUB1                                                                                                                                                                                                                                                                                                                              |
| 26 | 35972066 | 36309014 | 336949  | 3 | ATRN1                                                                                                                                                                                                                                                                                                                                        |
| 26 | 40430609 | 40672518 | 241910  | 3 | INPP5F, MCMBP, SEC23IP                                                                                                                                                                                                                                                                                                                       |
| 26 | 40672518 | 40801067 | 128550  | 4 | .                                                                                                                                                                                                                                                                                                                                            |
| 26 | 50798678 | 51172047 | 373370  | 2 | ADGRA1, LOC100850437, LOC101906136, LOC101908581, LOC104976015, LOC532031, LOC536342, LOC613726, LOC786314, TCERG1L                                                                                                                                                                                                                          |
| 26 | 51172047 | 51492542 | 320496  | 5 | INPP5A, LOC100848865, LOC101906198, LOC104968408, LOC104968412, LOC104976018, NKX6-2                                                                                                                                                                                                                                                         |
| 26 | 51492542 | 51887948 | 395407  | 6 | BNIP3, DPYSL4, JAKMIP3, LOC101902400, LOC104976020, LOC107131400, LRRC27, PWWP2B, STK32C                                                                                                                                                                                                                                                     |
| 27 | 26474312 | 27281408 | 807097  | 3 | LOC107133410, LOC107133411, WRN                                                                                                                                                                                                                                                                                                              |
| 27 | 29115228 | 30761774 | 1646547 | 2 | DUSP26, LOC104976098, LOC104976101, LOC104976102, LOC783570, RNF122, UNC5D                                                                                                                                                                                                                                                                   |
| 27 | 37857449 | 38442388 | 584940  | 2 | CSGALNACT1, SH2D4A                                                                                                                                                                                                                                                                                                                           |
| 27 | 38442388 | 38651622 | 209235  | 2 | LOC104970724, LOC107133412                                                                                                                                                                                                                                                                                                                   |
| 28 | 2900860  | 2978193  | 77334   | 5 | LOC100336396, LOC100847909                                                                                                                                                                                                                                                                                                                   |
| 28 | 15323668 | 15594721 | 271054  | 2 | MIR2403, SLC16A9                                                                                                                                                                                                                                                                                                                             |
| 28 | 15594721 | 15772990 | 178270  | 2 | CCDC6, MRLN                                                                                                                                                                                                                                                                                                                                  |
| 28 | 20759229 | 20862144 | 102916  | 2 | .                                                                                                                                                                                                                                                                                                                                            |
| 28 | 20862144 | 21441018 | 578875  | 2 | .                                                                                                                                                                                                                                                                                                                                            |
| 28 | 23455477 | 24122830 | 667354  | 3 | CTNNA3, LOC101902668, LRRTM3, TRNAW-CCA                                                                                                                                                                                                                                                                                                      |
| 28 | 24122830 | 24303173 | 180344  | 3 | CTNNA3                                                                                                                                                                                                                                                                                                                                       |
| 28 | 29269052 | 29889777 | 620726  | 2 | ANXA7, CFAP70, DNAJC9, ECD, FAM149B1, LOC101902840, LOC101904869, LOC101904940, LOC107131940, MRPS16, MSS51, MYOZ1, NUDT13, P4HA1, PPP3CB, USP54                                                                                                                                                                                             |
| 28 | 31173519 | 31594380 | 420862  | 2 | COMTD1, LOC101903749, LOC101907017, LOC104969722, LOC107131935, LOC107131943, LOC508976, SAMD8, VDACC2, ZNF503                                                                                                                                                                                                                               |
| 28 | 31594380 | 32104452 | 510073  | 2 | .                                                                                                                                                                                                                                                                                                                                            |
| 28 | 32104452 | 32133154 | 28703   | 2 | .                                                                                                                                                                                                                                                                                                                                            |
| 28 | 37370303 | 37926764 | 556462  | 3 | NRG3                                                                                                                                                                                                                                                                                                                                         |
| 28 | 38669808 | 39017338 | 347531  | 5 | .                                                                                                                                                                                                                                                                                                                                            |
| 28 | 39017338 | 39171949 | 154612  | 3 | .                                                                                                                                                                                                                                                                                                                                            |
| 28 | 39171949 | 39490317 | 318369  | 2 | LOC781868                                                                                                                                                                                                                                                                                                                                    |
| 28 | 40289853 | 41077888 | 788036  | 2 | GRID1, TRNAG-CCC                                                                                                                                                                                                                                                                                                                             |
| 28 | 41077888 | 42182436 | 1104549 | 2 | ADIRF, BMP1A, FAM25A, FAM35A, GLUD1, GRID1, LDB3, LOC104971065, MIR346, MMRN2, OPN4, SNCG, TRNAC-GCA, WAPL                                                                                                                                                                                                                                   |
| 28 | 42182436 | 42373688 | 191253  | 2 | FAM35A, GPRIN2, SYT15                                                                                                                                                                                                                                                                                                                        |
| 28 | 42373688 | 42730191 | 356504  | 2 | ANTXRL, ANXA8L1, LOC101907562, LOC104971095, LOC107131410, LOC615066, PPYR1                                                                                                                                                                                                                                                                  |
| 28 | 42730191 | 43192098 | 461908  | 2 | FRMPD2, GDF10, GDF2, LOC100294763, PTPN20, RBP3, ZNF488                                                                                                                                                                                                                                                                                      |
| 29 | 21878497 | 21961790 | 83294   | 4 | .                                                                                                                                                                                                                                                                                                                                            |
| 29 | 27116249 | 27258966 | 142718  | 6 | LOC100299320, LOC100299628, LOC100300434, LOC100301071, LOC100336852, LOC104968406, LOC107133419, LOC506981, LOC510293, LOC522385, OR10S1                                                                                                                                                                                                    |
| 29 | 27258966 | 27510423 | 251458  | 6 | LOC100301320, LOC504623, LOC517144, LOC523680, LOC616631, LOC781901, LOC782146, LOC782216, LOC782248, LOC782288, LOC782329, LOC782366, OR8G2, OR8G5, VWA5A                                                                                                                                                                                   |
| 29 | 27510423 | 27535814 | 25392   | 5 | LOC788328                                                                                                                                                                                                                                                                                                                                    |
| 29 | 27535814 | 27580808 | 44995   | 6 | LOC100301231, LOC107133420                                                                                                                                                                                                                                                                                                                   |
| 29 | 27580808 | 27865578 | 284771  | 5 | LOC100301231, LOC100336420, LOC100850308, LOC506960, LOC509323, LOC512722, LOC531816, LOC614419, LOC781277, LOC781319, LOC781359, LOC781398, LOC781509, LOC781589, LOC781627, LOC781666, LOC781706, LOC781746, LOC781797, LOC781828, LOC782155, TMEM225                                                                                      |
| 29 | 27865578 | 28229632 | 364055  | 5 | LOC100139052, LOC100140862, LOC100141288, LOC100301297, LOC510984, LOC513062, LOC514864, LOC516940, LOC526276, LOC531225, LOC616755, LOC781383, LOC781842, LOC782009, LOC782191, LOC782221, LOC782257, LOC782297, LOC782375, LOC787625, LOC787694, LOC788544, LOC788554, LOC788573, LOC788590, LOC788607, LOC788620, OR8D2, OR8G5, TRNAV-CAC |
| 29 | 28229632 | 28258424 | 28793   | 4 | LOC100139434, LOC785107                                                                                                                                                                                                                                                                                                                      |
| 29 | 35026127 | 35124885 | 98759   | 2 | OPCML                                                                                                                                                                                                                                                                                                                                        |

**Supplementary Table 22. Summary of the results from the enrichment analysis of genes introgressed from *Bos javanicus* into Chinese indicine cattle and from yak into Tibetan taurine cattle according to RFMix analyses.** The GO and KEGG analyses performed with DAVID 6.7 use lists of genes present in chromosomal regions detected as introgressed from *Bos javanicus* into Chinese indicine cattle and from yak into Tibetan taurine cattle according to RFMix analyses. *P* values are Bonferroni-corrected *P* values  $\leq 10^{-2}$ .

| Category                                                                                  | Database entry | Term                                                                                      | Number of genes | Bonferroni  | Enrichment |
|-------------------------------------------------------------------------------------------|----------------|-------------------------------------------------------------------------------------------|-----------------|-------------|------------|
| Enrichment analysis of genes introgressed from <i>Bos javanicus</i> into Chinese indicine |                |                                                                                           |                 |             |            |
| GOTERM_BP_DIRECT                                                                          | GO:0002323     | Natural killer cell activation involved in immune response                                | 30              | 1.31136E-10 | 4.2        |
| GOTERM_BP_DIRECT                                                                          | GO:0007186     | G-protein coupled receptor signaling pathway                                              | 224             | 6.5058E-10  | 1.6        |
| GOTERM_BP_DIRECT                                                                          | GO:0002286     | T cell activation involved in immune response                                             | 30              | 1.24248E-09 | 3.9        |
| GOTERM_BP_DIRECT                                                                          | GO:0033141     | Positive regulation of peptidyl-serine phosphorylation of STAT                            | 29              | 4.79439E-09 | 3.9        |
| GOTERM_BP_DIRECT                                                                          | GO:0042100     | B cell proliferation                                                                      | 31              | 1.81381E-07 | 3.4        |
| GOTERM_BP_DIRECT                                                                          | GO:0006959     | Humoral immune response                                                                   | 33              | 1.14066E-06 | 3.1        |
| GOTERM_BP_DIRECT                                                                          | GO:0043330     | Response to exogenous dsRNA                                                               | 31              | 1.55757E-06 | 3.2        |
| GOTERM_BP_DIRECT                                                                          | GO:0019221     | Cytokine-mediated signaling pathway                                                       | 51              | 4.22693E-06 | 2.4        |
| GOTERM_BP_DIRECT                                                                          | GO:0002250     | Adaptive immune response                                                                  | 37              | 1.27905E-05 | 2.7        |
| GOTERM_BP_DIRECT                                                                          | GO:0030183     | B cell differentiation                                                                    | 32              | 9.93E-04    | 2.6        |
| GOTERM_BP_DIRECT                                                                          | GO:0007608     | Sensory perception of smell                                                               | 69              | 1.13E-03    | 1.8        |
| KEGG_PATHWAY                                                                              | bta04740:      | Olfactory transduction                                                                    | 269             | 1.20782E-05 | 1.3        |
| KEGG_PATHWAY                                                                              | bta04742:      | Taste transduction                                                                        | 22              | 3.33E-04    | 3.0        |
| KEGG_PATHWAY                                                                              | bta05322:      | Systemic lupus erythematosus                                                              | 60              | 1.20E-03    | 1.8        |
| Enrichment analysis of genes introgressed from yak into Tibetan taurine cattle            |                |                                                                                           |                 |             |            |
| GOTERM_BP_DIRECT                                                                          | GO:0007608     | sensory perception of smell                                                               | 33              | 1.10927E-07 | 3.9        |
| GOTERM_BP_DIRECT                                                                          | GO:1903352     | L-ornithine transmembrane transport                                                       | 9               | 2.51448E-06 | 19.3       |
| GOTERM_BP_DIRECT                                                                          | GO:0002504     | antigen processing and presentation of peptide or polysaccharide antigen via MHC class II | 9               | 5.12E-04    | 11.8       |
| KEGG_PATHWAY                                                                              | bta05332:      | Graft-versus-host disease                                                                 | 16              | 2.18123E-08 | 8.8        |
| KEGG_PATHWAY                                                                              | bta04940:      | Type I diabetes mellitus                                                                  | 15              | 6.09463E-06 | 6.6        |
| KEGG_PATHWAY                                                                              | bta05323:      | Rheumatoid arthritis                                                                      | 18              | 1.28E-04    | 4.4        |
| KEGG_PATHWAY                                                                              | bta05330:      | Allograft rejection                                                                       | 13              | 1.91E-04    | 6.1        |
| KEGG_PATHWAY                                                                              | bta05416       | Viral myocarditis                                                                         | 14              | 1.58E-03    | 4.7        |
| KEGG_PATHWAY                                                                              | bta05321       | Inflammatory bowel disease (IBD)                                                          | 14              | 1.86E-03    | 4.6        |
| KEGG_PATHWAY                                                                              | bta05320       | Autoimmune thyroid disease                                                                | 13              | 2.25E-03    | 4.9        |



**Supplementary Table 23. Information of regions of banteng introgression into Chinese indicine cattle associated with heat stress**

| Chrom | Start (bp) | End (bp) | Size (bp) | Hap (n) | Gene content of the introgressed interval                                                                                                                                                                                                                                                                                                                                                                              | Biological process                                                                                                                                                                                                                                                                                                                                 |
|-------|------------|----------|-----------|---------|------------------------------------------------------------------------------------------------------------------------------------------------------------------------------------------------------------------------------------------------------------------------------------------------------------------------------------------------------------------------------------------------------------------------|----------------------------------------------------------------------------------------------------------------------------------------------------------------------------------------------------------------------------------------------------------------------------------------------------------------------------------------------------|
| 6     | 31905934   | 32352232 | 446299    | 2       | <b>ATOH1</b> HPGDS LOC100140135 SMARCAD1                                                                                                                                                                                                                                                                                                                                                                               | ATOH1 is involved in hair cell differentiation                                                                                                                                                                                                                                                                                                     |
| 7     | 45725639   | 46602147 | 876509    | 2       | ABHD17A ADAT3 AFF4 ATP8B3 BTBD2 CSNK1G2 GDF9 <b>HSPA4</b> KLF16 LEAP2<br>LOC104969170 LOC107131164 LOC107132633 LOC107132634 LOC781086 LOC781691<br>MBD3 MEX3D MIR6120 PLK5 REXO1 SCAMP4 SHROOM1 SOWAHA TCF3 UQCR11<br>UQCRQ ZCCHC10                                                                                                                                                                                   |                                                                                                                                                                                                                                                                                                                                                    |
| 8     | 53852427   | 54953273 | 1100847   | 2       | CEP78 GNA14 GNAQ LOC101907250 LOC104969366 LOC104972905 LOC107132694<br>PSAT1 <b>VPS13A</b>                                                                                                                                                                                                                                                                                                                            | Blood circulation                                                                                                                                                                                                                                                                                                                                  |
| 8     | 65476773   | 66108488 | 631716    | 5       | ERP44 <b>INVS</b> LOC101908166 LOC107132702 NR4A3 STX17 TEX10                                                                                                                                                                                                                                                                                                                                                          | Blood circulation                                                                                                                                                                                                                                                                                                                                  |
| 9     | 27664454   | 29613821 | 1949368   | 7       | CLVS2 FABP7 <b>HSF2</b> LOC100848869 LOC101904186 LOC101905260 LOC101908885<br>LOC101909028 LOC107132761 LOC781754 MIR2478 PKIB SERINC1 SMPDL3A TRDN                                                                                                                                                                                                                                                                   | The protein encoded by this gene belongs to the HSF family of transcription factors that bind specifically to the heat-shock promoter element and activate transcription. Heat shock transcription factors activate heat-shock response genes under conditions of heat or other stresses.                                                          |
| 15    | 34351275   | 34537981 | 186707    | 3       | CLMP <b>HSPA8</b> LOC107133162                                                                                                                                                                                                                                                                                                                                                                                         | Heat stress induces formation of cytoplasmic granules                                                                                                                                                                                                                                                                                              |
| 15    | 22694978   | 23094071 | 399094    | 2       | BCO2 C15H11orf1 C15H11orf52 C15H11orf57 CRYAB DIXDC1 DLAT <b>HSPB2</b> IL18<br>LOC101903059 LOC101903125 LOC101906594 LOC104968480 LOC104974189 PIH1D2<br>PTS SDHD TEX12 TIMM8B                                                                                                                                                                                                                                        |                                                                                                                                                                                                                                                                                                                                                    |
| 19    | 3842129    | 4335161  | 493033    | 4       | <b>KIF2B</b>                                                                                                                                                                                                                                                                                                                                                                                                           | Blood circulation                                                                                                                                                                                                                                                                                                                                  |
| 23    | 27261793   | 27727673 | 465881    | 8       | ABHD16A AIF1 APOM ATP6V1G2 BAG6 BoLA C2 C23H6orf25 C23H6orf47 CFB CLIC1<br>CSNK2B DDAH2 DDX39B DXO EHMT2 GPANK1 <b>HSPA1A HSPA1L</b> LOC100139548<br>LOC100847561 LOC104975663 LOC107131731 LOC107133388 LOC107133390<br>LOC617696 LOC781796 LOC783502 LSM2 LST1 LTA LTB LY6G5B LY6G5C LY6G6C<br>LY6G6D LY6G6E LY6G6F MCCD1 MGC126945 MSH5 NCR3 NELFE NEU1 NFKBIL1<br>PRRC2A SAPCD1 SLC44A4 STK19 TNF VARS VWA7 ZBTB12 | This intronless gene encodes a 70kDa heat shock protein which is a member of the heat shock protein 70 family. In conjunction with other heat shock proteins, this protein stabilizes existing proteins against aggregation and mediates the folding of newly translated proteins in the cytosol and in organelles. The HSPA1A are heat inducible. |

**Supplementary Table 24. Most negative and significant  $f_3$  statistics for various species of the tribe of Bovini, with Tibetan taurine cattle as the target population and Hanwoo or Mishima as one of the source populations.**

| Source1    | Source2        | Target         | $f_3$           | Standard error  | Z-score        |
|------------|----------------|----------------|-----------------|-----------------|----------------|
| <b>Yak</b> | <b>Hanwoo</b>  | <b>Tibetan</b> | <b>-0.05006</b> | <b>0.004209</b> | <b>-11.893</b> |
| Wisent     | Hanwoo         | Tibetan        | -0.02297        | 0.002637        | -8.708         |
| Bison      | Hanwoo         | Tibetan        | -0.01903        | 0.002587        | -7.356         |
| Gaur       | Hanwoo         | Tibetan        | -0.01573        | 0.002362        | -6.661         |
| Banteng    | Hanwoo         | Tibetan        | -0.01401        | 0.002252        | -6.221         |
| Buffalo    | Hanwoo         | Tibetan        | -0.01202        | 0.002171        | -5.535         |
| Gayal      | Hanwoo         | Tibetan        | -0.00995        | 0.002097        | -4.746         |
| <b>Yak</b> | <b>Mishima</b> | <b>Tibetan</b> | <b>-0.05583</b> | <b>0.004202</b> | <b>-13.287</b> |
| Wisent     | Mishima        | Tibetan        | -0.02943        | 0.002712        | -10.85         |
| Bison      | Mishima        | Tibetan        | -0.02596        | 0.002704        | -9.601         |
| Gaur       | Mishima        | Tibetan        | -0.02287        | 0.002492        | -9.176         |
| Banteng    | Mishima        | Tibetan        | -0.02115        | 0.002365        | -8.94          |
| Buffalo    | Mishima        | Tibetan        | -0.01851        | 0.002283        | -8.111         |
| Gayal      | Mishima        | Tibetan        | -0.01754        | 0.002363        | -7.42          |

**Supplementary Table 25. The result of *D* statistic tests performed to detect admixture from of the tribe of Bovini (Y) to either W or X. Negative *D* statistic values indicate that gene flow has occurred from Y to X, and positive *D* statistic values indicate that gene flow has occurred from Y to W.**

| W              | X              | Y       | Z              | <i>D</i> statistic | Z-value        |
|----------------|----------------|---------|----------------|--------------------|----------------|
| <b>Mishima</b> | <b>Tibetan</b> | Yak     | <b>Buffalo</b> | <b>-0.1492</b>     | <b>-11.731</b> |
| Mishima        | Tibetan        | Wisent  | Buffalo        | -0.0505            | -13.005        |
| Mishima        | Tibetan        | Bison   | Buffalo        | -0.0422            | -10.546        |
| Mishima        | Tibetan        | Banteng | Buffalo        | -0.0505            | -7.5572        |
| Mishima        | Tibetan        | Gayal   | Buffalo        | -0.0115            | -2.0212        |
| Mishima        | Tibetan        | Gaur    | Buffalo        | -0.0276            | -6.3492        |

**Supplementary Table 26. Statistics on introgressed intervals for nine Tibetan taurine cattle. The following values are shown for each Tibetan taurine cattle: the number of introgressed intervals (count); the minimal (min), maximal (max), mean (mean), and sum (sum) of introgressed interval lengths. The proportion of the cattle genome that is introgressed (proportion).**

| Number | Sample             | Count | Introgression interval length |           |         |             | Proportion |
|--------|--------------------|-------|-------------------------------|-----------|---------|-------------|------------|
|        |                    |       | Min                           | Max       | Mean    | Sum         |            |
| 1      | Tibetan01          | 696   | 1,423                         | 1,977,400 | 78,147  | 54,390,591  | 0.01075    |
| 2      | Tibetan02          | 701   | 1,292                         | 1,235,984 | 65,133  | 45,658,902  | 0.00903    |
| 3      | Tibetan03          | 846   | 1,425                         | 1,312,877 | 78,387  | 66,315,608  | 0.01311    |
| 4      | Tibetan04          | 1,132 | 1,448                         | 3,799,924 | 63,388  | 71,755,549  | 0.01419    |
| 5      | Tibetan05          | 574   | 1,495                         | 1,830,515 | 117,618 | 67,512,744  | 0.01335    |
| 6      | Tibetan06          | 626   | 1,454                         | 5,531,465 | 237,645 | 148,765,835 | 0.02941    |
| 7      | Tibetan07          | 981   | 1,442                         | 1,246,271 | 29,123  | 28,570,204  | 0.00565    |
| 8      | Tibetan08          | 891   | 1,423                         | 1,307,606 | 53,318  | 47,506,582  | 0.00939    |
| 9      | Tibetan09          | 332   | 1,448                         | 1,541,354 | 71,514  | 23,742,899  | 0.00469    |
|        | Max                | 1,132 | 1,495                         | 5,531,465 | 237,645 | 148,765,835 | 0.02941    |
|        | Min                | 332   | 1,292                         | 1,235,984 | 29,123  | 23,742,899  | 0.00469    |
|        | Mean               | 753   | 1,427                         | 2,198,155 | 88,252  | 61,579,879  | 0.01218    |
|        | Standard deviation | 238   | 55                            | 1,487,471 | 607,554 | 36,720,324  | 0.00726    |
|        | Standard error     | 58    | 13                            | 360,764   | 147,353 | 8,905,986   | 0.00176    |

**Supplementary Table 27. List of introgression intervals from yak into Tibetan taurine cattle detected by RFMix analyses and were shared by at least two haplotypes**

Chromosome (Btau\_5.0.1) start and end positions and number of introgressed haplotype and gene content of introgressed intervals.

| Chr | Start (bp) | End (bp)  | Length (bp) | Hap (n) | Gene ID                                                                                                                                                              |
|-----|------------|-----------|-------------|---------|----------------------------------------------------------------------------------------------------------------------------------------------------------------------|
| 1   | 113643307  | 114213616 | 570310      | 4       | LOC100847501 MME TRNAK-UUU                                                                                                                                           |
| 1   | 114213616  | 114277037 | 63422       | 4       | .                                                                                                                                                                    |
| 1   | 114277037  | 114768002 | 490966      | 5       | ARHGEF26 DHX36 GPR149 TRNAC-GCA                                                                                                                                      |
| 1   | 114768002  | 115005269 | 237268      | 5       | ARHGEF26                                                                                                                                                             |
| 1   | 115005269  | 115199245 | 193977      | 6       | LOC783160 LOC784259                                                                                                                                                  |
| 1   | 115199245  | 115553700 | 354456      | 6       | LOC784259                                                                                                                                                            |
| 1   | 115553700  | 115675721 | 122022      | 6       | .                                                                                                                                                                    |
| 1   | 115675721  | 115992033 | 316313      | 9       | LOC100299503 RAP2B TRNAG-CCC                                                                                                                                         |
| 1   | 115992033  | 116023617 | 31585       | 8       | LOC104970034                                                                                                                                                         |
| 1   | 116023617  | 116558953 | 535337      | 8       | LOC104969763 P2RY1                                                                                                                                                   |
| 1   | 116558953  | 117229917 | 670965      | 8       | LOC615622 MBNL1                                                                                                                                                      |
| 1   | 117229917  | 117861610 | 631694      | 7       | AADAC AADACL2 LOC100300210 LOC107132208 LOC523130 LOC613884 LOC782222<br>LOC782258 LOC782298 MIR1246 SUCNR1                                                          |
| 1   | 117861610  | 117979692 | 118083      | 8       | LOC104971000                                                                                                                                                         |
| 1   | 117979692  | 118068325 | 88634       | 8       | IGSF10 MED12L P2RY12                                                                                                                                                 |
| 1   | 118068325  | 118619420 | 551096      | 8       | CLRN1 GPR171 GPR87 LOC104971001 MED12L P2RY12 P2RY13 P2RY14                                                                                                          |
| 1   | 118619420  | 119420496 | 801077      | 6       | EIF2A ERICH6 LOC104971002 LOC104971004 LOC104971005 LOC104971006 SELT<br>SERP1 SIAH2 TRNAR-CCU TSC22D2                                                               |
| 1   | 119420496  | 119543658 | 123163      | 7       | LOC101905340                                                                                                                                                         |
| 1   | 119543658  | 119662047 | 118390      | 6       | PFN2 RNF13                                                                                                                                                           |
| 1   | 119662047  | 120450802 | 788756      | 7       | ANKUB1 COMMD2 CP HPS3 LOC100847676 LOC101905481 LOC104971009<br>LOC526230 RNF13 TM4SF1 TM4SF18 TM4SF4 TRNAG-CCC WWTR1                                                |
| 1   | 120450802  | 120625485 | 174684      | 7       | GYG1 HLF                                                                                                                                                             |
| 1   | 120625485  | 120792006 | 166522      | 8       | CPA3 CPB1                                                                                                                                                            |
| 1   | 120792006  | 120805239 | 13234       | 8       | .                                                                                                                                                                    |
| 1   | 120805239  | 120910944 | 105706      | 8       | AGTR1                                                                                                                                                                |
| 1   | 120910944  | 121561875 | 650932      | 6       | AGTR1 LOC104968807 LOC781192                                                                                                                                         |
| 1   | 121561875  | 122566404 | 1004530     | 7       | LOC100139345 LOC100295922 LOC101905819 LOC101906885 LOC786256 TRNAC-<br>ACA ZIC1 ZIC4                                                                                |
| 1   | 122566404  | 122960109 | 393706      | 6       | .                                                                                                                                                                    |
| 1   | 144615772  | 145122298 | 506527      | 2       | LOC101905728 PDE9A RSPH1 SLC37A1 TFF1 TFF2 TMPRSS3 UBASH3A                                                                                                           |
| 2   | 13155924   | 13784582  | 628659      | 3       | DUSP19 FRZB NCKAP1 NUP35 TRNAC-GCA                                                                                                                                   |
| 2   | 13784582   | 14475877  | 691296      | 3       | DNAJC10 FRZB LOC107132237 PDE1A                                                                                                                                      |
| 2   | 18361681   | 18637847  | 276167      | 2       | DFNB59 FKBP7 LOC785777 OSBPL6 PLEKHA3 PRKRA TTN                                                                                                                      |
| 2   | 18637847   | 19005589  | 367743      | 7       | CYCT OSBPL6 PDE11A RBM45                                                                                                                                             |
| 2   | 19005589   | 19542351  | 536763      | 9       | AGPS LOC781702 PDE11A TTC30A TTC30B                                                                                                                                  |
| 2   | 19542351   | 19578766  | 36416       | 7       | .                                                                                                                                                                    |
| 2   | 19578766   | 19648656  | 69891       | 7       | AGPS                                                                                                                                                                 |
| 2   | 19648656   | 20143878  | 495223      | 6       | HNRNPA3 LOC104971138 MIR4444 NFE2L2                                                                                                                                  |
| 2   | 20143878   | 20911198  | 767321      | 6       | HOXD1 HOXD10 HOXD3 HOXD4 HOXD8 HOXD9 LOC100140646 LOC100847387<br>LOC104971140 LOC104971141 LOC104971146 MIR10B MTX2                                                 |
| 2   | 20911198   | 20977966  | 66769       | 3       | HOXD11 HOXD12 HOXD13 LOC107132238                                                                                                                                    |
| 2   | 25940708   | 27771222  | 1830515     | 3       | ABCB11 BBS5 CCDC173 CERS6 DHRS9 FASTKD1 G6PC2 KLHL23 KLHL41<br>LOC101906273 LOC104971168 LRP2 METTL5 MIR2353 MYO3B NOSTRIN PHOSPHO2<br>PIIG SPC25 SSB TRNAR-UCU UBR3 |
| 2   | 27771222   | 27809053  | 37832       | 2       | .                                                                                                                                                                    |
| 2   | 27809053   | 27897825  | 88773       | 2       | .                                                                                                                                                                    |
| 2   | 27897825   | 28116851  | 219027      | 2       | LOC107132248 STK39                                                                                                                                                   |
| 3   | 53008466   | 53315742  | 307277      | 2       | .                                                                                                                                                                    |
| 3   | 64688481   | 65175398  | 486918      | 2       | .                                                                                                                                                                    |
| 3   | 81905816   | 82166303  | 260488      | 2       | ROR1 UBE2U                                                                                                                                                           |
| 3   | 82166303   | 82540034  | 373732      | 2       | ROR1                                                                                                                                                                 |
| 3   | 82540034   | 82737858  | 197825      | 2       | EFCAB7 ITGB3BP PGM1                                                                                                                                                  |
| 3   | 82737858   | 83160984  | 423127      | 3       | ALG6 FOXD3 ITGB3BP LOC101906485                                                                                                                                      |
| 4   | 1282343    | 2864382   | 1582040     | 2       | LOC107132368 LOC784126                                                                                                                                               |
| 4   | 2864382    | 2893888   | 29507       | 2       | .                                                                                                                                                                    |
| 4   | 2893888    | 3170182   | 276295      | 2       | .                                                                                                                                                                    |
| 4   | 3170182    | 3300026   | 129845      | 2       | .                                                                                                                                                                    |
| 4   | 3300026    | 3826707   | 526682      | 2       | LOC107132369                                                                                                                                                         |
| 4   | 3826707    | 4103887   | 277181      | 2       | LOC100139578                                                                                                                                                         |
| 4   | 4103887    | 4484206   | 380320      | 2       | .                                                                                                                                                                    |
| 4   | 4484206    | 5369594   | 885389      | 2       | COBL DDC GRB10 LOC107131141 TRNAT-UGU                                                                                                                                |
| 4   | 5369594    | 5784693   | 415100      | 2       | C4H7orf72 DDC FIGNL1 IKZF1 LOC101903668 ZPBP                                                                                                                         |
| 4   | 5784693    | 5818696   | 34004       | 2       | ZPBP                                                                                                                                                                 |
| 4   | 5818696    | 5856645   | 37950       | 2       | ZPBP                                                                                                                                                                 |
| 4   | 5856645    | 6436870   | 580226      | 2       | LOC101904266 VWC2 ZPBP                                                                                                                                               |
| 4   | 6436870    | 7771543   | 86421       | 2       | CLDN12                                                                                                                                                               |
| 4   | 7771543    | 7994889   | 223347      | 2       | CDK14 LOC100847712 LOC101910184                                                                                                                                      |
| 4   | 7994889    | 8032883   | 37995       | 2       | CDK14                                                                                                                                                                |
| 4   | 8032883    | 8150521   | 117639      | 3       | CDK14                                                                                                                                                                |
| 4   | 8150521    | 8245381   | 94861       | 3       | CDK14                                                                                                                                                                |
| 4   | 8245381    | 8612189   | 366809      | 3       | CDK14 FZD1 LOC104971924                                                                                                                                              |
| 4   | 8612189    | 8626304   | 14116       | 3       | .                                                                                                                                                                    |
| 4   | 8626304    | 8648253   | 21950       | 3       | LOC782091                                                                                                                                                            |
| 4   | 8648253    | 9009448   | 361196      | 3       | LOC100140224                                                                                                                                                         |
| 4   | 9009448    | 9107648   | 98201       | 3       | LOC101908673 LOC107132376                                                                                                                                            |
| 4   | 9107648    | 9132995   | 25348       | 3       | LOC101908673                                                                                                                                                         |
| 4   | 9132995    | 9182533   | 49539       | 3       | LOC101908673 MTERF1                                                                                                                                                  |
| 4   | 9182533    | 10134283  | 951751      | 2       | AKAP9 ANKIB1 CDK6 CYP51A1 FAM133B GATAD1 KRIT1 LOC101906914<br>LOC104971926 LOC107132377 LOC524650 LRRD1 MIR584-5 PEX1 RBM48 TMBIM1B<br>TRNAC-ACA TRNAG-CCC          |
| 4   | 31106122   | 31219675  | 113554      | 3       | RAPGEF5                                                                                                                                                              |
| 4   | 31219675   | 31268443  | 48769       | 4       | RAPGEF5                                                                                                                                                              |

|   |           |           |         |   |                                                                                                                                                                                                                                                                                                                                          |
|---|-----------|-----------|---------|---|------------------------------------------------------------------------------------------------------------------------------------------------------------------------------------------------------------------------------------------------------------------------------------------------------------------------------------------|
| 4 | 31268443  | 32028173  | 759731  | 4 | FAM126A IL6 LOC100138586 LOC100139677 LOC100848985 LOC101907914<br>LOC101907978 LOC107132385 LOC613401 RAPGEF5 TOMM7                                                                                                                                                                                                                     |
| 4 | 32028173  | 32404013  | 375841  | 4 | GPNMB IGF2BP3 KLHL7 LOC101902372 LOC107132386 MALSU1 NUPL2 TRA2A                                                                                                                                                                                                                                                                         |
| 4 | 32404013  | 33716889  | 1312877 | 4 | ABCB1 ABCB4 CCDC126 CROT DBF4 DMTF1 KIAA1324L LOC100296627<br>LOC101902435 LOC101902991 LOC107132387 LOC107132388 LOC107132389<br>LOC511386 LOC512293 LOC781303 LOC785370 RUNC3B SLC25A40 TMEM243<br>TRNAC-GCA                                                                                                                           |
| 4 | 33716889  | 34054750  | 337862  | 5 | GRM3 KIAA1324L LOC107132390                                                                                                                                                                                                                                                                                                              |
| 4 | 34054750  | 34690818  | 636069  | 5 | GRM3 LOC100337094 LOC101904927 LOC107132390 TRNAS-GGA                                                                                                                                                                                                                                                                                    |
| 4 | 34690818  | 34894334  | 203517  | 4 | LOC781830                                                                                                                                                                                                                                                                                                                                |
| 4 | 34894334  | 35380283  | 485950  | 4 | LOC104969864 TRNAC-GCA                                                                                                                                                                                                                                                                                                                   |
| 4 | 35380283  | 35437839  | 57557   | 5 | .                                                                                                                                                                                                                                                                                                                                        |
| 4 | 35437839  | 36119017  | 681179  | 5 | LOC104972008 SEMA3D                                                                                                                                                                                                                                                                                                                      |
| 4 | 36119017  | 36577232  | 458216  | 6 | .                                                                                                                                                                                                                                                                                                                                        |
| 4 | 36577232  | 37109665  | 532434  | 5 | LOC104972001 SEMA3A                                                                                                                                                                                                                                                                                                                      |
| 4 | 37109665  | 37912794  | 803130  | 5 | LOC104972003 PCLO SEMA3E                                                                                                                                                                                                                                                                                                                 |
| 4 | 37912794  | 38042750  | 129957  | 3 | PCLO                                                                                                                                                                                                                                                                                                                                     |
| 4 | 38042750  | 38049926  | 7177    | 2 | PCLO                                                                                                                                                                                                                                                                                                                                     |
| 4 | 61426832  | 63140519  | 1713688 | 3 | ANLN DPY19L1 DPY19L2 EEPD1 HERPUD2 KIAA0895 LOC101906333 LOC107132407<br>LOC780968 LOC782400 NPSR1 SEPT7 TBX20 TRNAG-GCC                                                                                                                                                                                                                 |
| 4 | 63140519  | 63575683  | 435165  | 5 | BMPER                                                                                                                                                                                                                                                                                                                                    |
| 4 | 63575683  | 63781722  | 206040  | 4 | MIR1814C                                                                                                                                                                                                                                                                                                                                 |
| 4 | 73912316  | 74181346  | 269031  | 2 | ZNF804B                                                                                                                                                                                                                                                                                                                                  |
| 4 | 74181346  | 74377877  | 196532  | 2 | .                                                                                                                                                                                                                                                                                                                                        |
| 5 | 40725879  | 40835036  | 109158  | 2 | LOC534391 LRRK2 MUC19                                                                                                                                                                                                                                                                                                                    |
| 5 | 40835036  | 40914259  | 79224   | 2 | LRRK2                                                                                                                                                                                                                                                                                                                                    |
| 5 | 41851904  | 42002693  | 150790  | 2 | LOC785955                                                                                                                                                                                                                                                                                                                                |
| 5 | 42002693  | 42012783  | 10091   | 2 | .                                                                                                                                                                                                                                                                                                                                        |
| 5 | 42012783  | 42032266  | 19484   | 2 | LOC100847470                                                                                                                                                                                                                                                                                                                             |
| 5 | 42032266  | 42391311  | 359046  | 2 | KIF21A LOC617654 MIR2428                                                                                                                                                                                                                                                                                                                 |
| 5 | 42391311  | 42650020  | 258710  | 2 | CPNE8 LOC101907676                                                                                                                                                                                                                                                                                                                       |
| 5 | 42650020  | 42795774  | 145755  | 2 | CPNE8                                                                                                                                                                                                                                                                                                                                    |
| 5 | 43468188  | 43676372  | 208185  | 2 | CNOT2 KCNMB4 LOC107131684 LOC107132479                                                                                                                                                                                                                                                                                                   |
| 5 | 43676372  | 44587511  | 911140  | 2 | BEST3 CCT2 FRS2 LOC100138933 LOC104972423 LOC107132482 LOC107132483<br>LOC781146 LOC785803 LRRC10 LYZ1 MIR2427 MYRFL RAB31P YEATS4                                                                                                                                                                                                       |
| 5 | 44587511  | 44659440  | 71930   | 2 | .                                                                                                                                                                                                                                                                                                                                        |
| 5 | 102669251 | 102876585 | 207335  | 3 | LOC101907335 LOC751788 WC-7                                                                                                                                                                                                                                                                                                              |
| 5 | 102876585 | 103143527 | 266943  | 2 | LOC100335428 LOC751788 LOC751789 WC1-12                                                                                                                                                                                                                                                                                                  |
| 5 | 103143527 | 103362683 | 219157  | 2 | LOC100336766 LOC107132521 LOC786796 WC1-10                                                                                                                                                                                                                                                                                               |
| 5 | 103362683 | 103455585 | 92903   | 3 | LOC100299671 WC1-10 WC1.3                                                                                                                                                                                                                                                                                                                |
| 5 | 103455585 | 103469955 | 14371   | 2 | WC1.3                                                                                                                                                                                                                                                                                                                                    |
| 5 | 103469955 | 103698356 | 228402  | 2 | LOC540180 LOC751804 WC1 WC1-8 WC1.3                                                                                                                                                                                                                                                                                                      |
| 5 | 106437129 | 107631887 | 1194759 | 2 | CCND2 CRACR2A FGF23 FGF6 LOC100847686 LOC101902968 LOC104972567<br>LOC104972568 LOC107132523 LOC107132524 PARP11 PRMT8 TEAD4 TIGAR<br>TSPAN11 TSPAN9                                                                                                                                                                                     |
| 5 | 114435850 | 114819029 | 383180  | 2 | ARFGAP3 LOC100298838 PACSIN2                                                                                                                                                                                                                                                                                                             |
| 6 | 22371695  | 22449947  | 78253   | 2 | .                                                                                                                                                                                                                                                                                                                                        |
| 6 | 22449947  | 22592758  | 142812  | 2 | .                                                                                                                                                                                                                                                                                                                                        |
| 6 | 28312754  | 28473100  | 160347  | 2 | LOC104972708                                                                                                                                                                                                                                                                                                                             |
| 6 | 28473100  | 29194796  | 721697  | 2 | LOC104972708 LOC104972710 LOC104972713 LOC782904 LOC782977 TRNAC-GCA                                                                                                                                                                                                                                                                     |
| 6 | 94322155  | 94324396  | 2242    | 2 | .                                                                                                                                                                                                                                                                                                                                        |
| 6 | 94324396  | 94447149  | 122754  | 2 | CXCL13 LOC100137799                                                                                                                                                                                                                                                                                                                      |
| 7 | 30141886  | 33941809  | 3799924 | 2 | CEP120 CSNK1G3 FTMT LOC100140613 LOC101906976 LOC101907246<br>LOC104969136 LOC104969139 LOC104969140 LOC104972827 LOC107132619<br>LOC107132620 LOC107132621 LOC107132622 LOC521901 LOC781423 LOC789456<br>LOX PPIC PRDM6 SNCAIP SNX2 SNX24 SRFBP1 ZNF608                                                                                 |
| 7 | 33941809  | 35188079  | 1246271 | 6 | FAM170A LOC100296599 LOC782989 LOC784563 PRR16                                                                                                                                                                                                                                                                                           |
| 7 | 35188079  | 35932756  | 744678  | 5 | HSD17B4 LOC100295797 LOC101907740 LOC104970228 LOC107132623 LOC540403                                                                                                                                                                                                                                                                    |
| 7 | 92743862  | 93116615  | 372754  | 2 | ADGRV1 LYSMD3 MBLAC2 POLR3G                                                                                                                                                                                                                                                                                                              |
| 8 | 18529969  | 19837574  | 1307606 | 2 | IZUMO3 LOC104969285 LOC104969286 LOC104969287 TUSC1                                                                                                                                                                                                                                                                                      |
| 9 | 64906054  | 65310701  | 404648  | 2 | LOC100174924 LOC100335322 LOC101906498 LOC104968426 LOC509791 NT5E<br>SNX14 SYNCRIP                                                                                                                                                                                                                                                      |
| 9 | 65310701  | 65692356  | 381656  | 2 | LOC101907349 LOC104970099                                                                                                                                                                                                                                                                                                                |
| 9 | 86236191  | 86711367  | 475177  | 2 | LOC100850276 SAMD5                                                                                                                                                                                                                                                                                                                       |
| 9 | 86711367  | 88829836  | 2118470 | 2 | GINM1 KATNA1 LATS1 LOC100299874 LOC100336795 LOC100848282 LOC101903261<br>LOC104969619 LOC104969628 LOC104972992 LOC107131280 LOC107132784<br>LOC107132785 LOC107132786 LOC107132787 LOC513548 LOC782566 LOC784274<br>LOC786867 LRP11 NUP43 PCMT1 PPIL4 PPP1R14C RAET1G SASH1 TAB2 ULBP21<br>ULBP27 UST ZC3H12D                          |
| 9 | 91600513  | 96158556  | 4558044 | 2 | ARID1B CLDN20 CNKSR3 IPCEF1 LDHAL6B LOC100298280 LOC100848475<br>LOC101902301 LOC101902393 LOC104969630 LOC104969633 LOC104970693<br>LOC104972996 LOC107132791 LOC514725 LOC616500 LOC616595 LOC617457<br>LOC783190 LOC788337 LOC789941 LOC789961 MIR2480 MIR2481 NOX3 OPRM1<br>OR4A15 OR4C6 SCAF8 TFB1M TIAM2 TMEM242 TRNAC-ACA ZDHHC14 |

|    |          |           |         |   |                                                                                                                                                                                                                                                                                                                                                                                                               |
|----|----------|-----------|---------|---|---------------------------------------------------------------------------------------------------------------------------------------------------------------------------------------------------------------------------------------------------------------------------------------------------------------------------------------------------------------------------------------------------------------|
| 9  | 96158556 | 100211145 | 4052590 | 2 | ACAT2 AGPAT4 AIRN DYNLT1 EZR FNDC1 GTF2H5 IGF2R LOC100847777<br>LOC101903438 LOC101904173 LOC101906344 LOC104969639 LOC104969640<br>LOC104969641 LOC104969644 LOC107132792 LOC107132793 LOC107132794<br>LOC107132795 LOC521027 LOC781966 LOC783891 MAP3K4 MAS1 MIR2482 MRPL18<br>PACRG PARK2 PLG PNLDC1 RSPH3 SERAC1 SLC22A1 SLC22A3 SNX9 SOD2 SYNJ2<br>SYTL3 TAGAP TCP1 TMEM181 TRNAG-UCC TULP4 WTAP ZDHHC14 |
| 10 | 2518634  | 2657018   | 138385  | 2 | .                                                                                                                                                                                                                                                                                                                                                                                                             |
| 10 | 10164286 | 10326715  | 162430  | 2 | BHMT JMY TRNAC-GCA                                                                                                                                                                                                                                                                                                                                                                                            |
| 10 | 10326715 | 10785480  | 458766  | 2 | CMYA5 HOMER1 JMY LOC104973035 LOC107132818 PAPD4                                                                                                                                                                                                                                                                                                                                                              |
| 10 | 96423289 | 96630703  | 207415  | 3 | .                                                                                                                                                                                                                                                                                                                                                                                                             |
| 10 | 96630703 | 97043276  | 412574  | 3 | .                                                                                                                                                                                                                                                                                                                                                                                                             |
| 10 | 97043276 | 97304221  | 260946  | 3 | .                                                                                                                                                                                                                                                                                                                                                                                                             |
| 10 | 97304221 | 97603679  | 299459  | 4 | .                                                                                                                                                                                                                                                                                                                                                                                                             |
| 10 | 97603679 | 97868957  | 265279  | 4 | MIR2293                                                                                                                                                                                                                                                                                                                                                                                                       |
| 11 | 45357627 | 45689572  | 331946  | 2 | ST6GAL2                                                                                                                                                                                                                                                                                                                                                                                                       |
| 11 | 45689572 | 45841028  | 151457  | 4 | LOC107132937 LOC532089 UXS1                                                                                                                                                                                                                                                                                                                                                                                   |
| 11 | 45841028 | 46240416  | 399389  | 5 | C11H2orf40 LOC101903923 LOC786288 NCK2                                                                                                                                                                                                                                                                                                                                                                        |
| 11 | 46240416 | 46248833  | 8418    | 6 | .                                                                                                                                                                                                                                                                                                                                                                                                             |
| 11 | 46248833 | 46348628  | 99796   | 6 | CHCHD5 POLR1B TTL                                                                                                                                                                                                                                                                                                                                                                                             |
| 11 | 46348628 | 47006375  | 657748  | 6 | CKAP2L IL1A IL1B IL1F10 IL1RN IL36A IL36B IL36G IL36RN IL37 LOC101903687<br>LOC101904177 LOC104973371 LOC107132933 LOC107132936 NT5DC4 PAX8 PSD4<br>SLC20A1                                                                                                                                                                                                                                                   |
| 11 | 47006375 | 47214431  | 208057  | 5 | LOC100335748 LOC100847269 PAX8                                                                                                                                                                                                                                                                                                                                                                                |
| 11 | 47214431 | 47259744  | 45314   | 3 | LOC100294952 LOC100335748 LOC100847269 LOC614219                                                                                                                                                                                                                                                                                                                                                              |
| 11 | 47259744 | 47280760  | 21017   | 3 | LOC100294952                                                                                                                                                                                                                                                                                                                                                                                                  |
| 11 | 47280760 | 47775386  | 494627  | 4 | EIF2AK3 FOXI3 LOC100294952 LOC784634 RPIA TEX37 TRNAC-ACA TRNAS-GGA                                                                                                                                                                                                                                                                                                                                           |
| 12 | 7538138  | 7538883   | 746     | 2 | .                                                                                                                                                                                                                                                                                                                                                                                                             |
| 12 | 7980108  | 8016320   | 36213   | 2 | .                                                                                                                                                                                                                                                                                                                                                                                                             |
| 12 | 8251330  | 8252089   | 760     | 2 | .                                                                                                                                                                                                                                                                                                                                                                                                             |
| 12 | 8475839  | 8477312   | 1474    | 2 | .                                                                                                                                                                                                                                                                                                                                                                                                             |
| 12 | 8610210  | 8610712   | 503     | 2 | .                                                                                                                                                                                                                                                                                                                                                                                                             |
| 12 | 8978864  | 8979483   | 620     | 2 | .                                                                                                                                                                                                                                                                                                                                                                                                             |
| 12 | 9024310  | 9030056   | 5747    | 2 | .                                                                                                                                                                                                                                                                                                                                                                                                             |
| 12 | 9030056  | 9071761   | 41706   | 2 | .                                                                                                                                                                                                                                                                                                                                                                                                             |
| 12 | 9071761  | 9098634   | 26874   | 3 | .                                                                                                                                                                                                                                                                                                                                                                                                             |
| 12 | 9098634  | 9111749   | 13116   | 3 | .                                                                                                                                                                                                                                                                                                                                                                                                             |
| 12 | 9111749  | 9133887   | 22139   | 3 | LOC101905933                                                                                                                                                                                                                                                                                                                                                                                                  |
| 12 | 9133887  | 9150883   | 16997   | 2 | .                                                                                                                                                                                                                                                                                                                                                                                                             |
| 12 | 9150883  | 9163103   | 12221   | 2 | .                                                                                                                                                                                                                                                                                                                                                                                                             |
| 12 | 9497165  | 9497829   | 665     | 2 | .                                                                                                                                                                                                                                                                                                                                                                                                             |
| 12 | 55214601 | 55217820  | 3220    | 2 | LOC104973609                                                                                                                                                                                                                                                                                                                                                                                                  |
| 12 | 55217820 | 55258686  | 40867   | 2 | LOC104973609                                                                                                                                                                                                                                                                                                                                                                                                  |
| 12 | 55258686 | 55289226  | 30541   | 2 | LOC104973609                                                                                                                                                                                                                                                                                                                                                                                                  |
| 12 | 55289226 | 55293758  | 4533    | 2 | LOC104973609                                                                                                                                                                                                                                                                                                                                                                                                  |
| 12 | 55293758 | 55293813  | 56      | 3 | LOC104973609                                                                                                                                                                                                                                                                                                                                                                                                  |
| 12 | 55293813 | 55294014  | 202     | 3 | LOC104973609                                                                                                                                                                                                                                                                                                                                                                                                  |
| 12 | 55294014 | 55298329  | 4316    | 3 | LOC101904423 LOC104973609                                                                                                                                                                                                                                                                                                                                                                                     |
| 12 | 55298329 | 55300769  | 2441    | 4 | LOC101904423 LOC104973609                                                                                                                                                                                                                                                                                                                                                                                     |
| 12 | 55300769 | 55349623  | 48855   | 3 | LOC101904423 LOC104973609                                                                                                                                                                                                                                                                                                                                                                                     |
| 12 | 55349623 | 55381927  | 32305   | 2 | LOC104973609                                                                                                                                                                                                                                                                                                                                                                                                  |
| 12 | 55381927 | 55402608  | 20682   | 2 | LOC104973609                                                                                                                                                                                                                                                                                                                                                                                                  |
| 12 | 55402608 | 55463374  | 60767   | 2 | LOC104973609                                                                                                                                                                                                                                                                                                                                                                                                  |
| 12 | 55463374 | 55472521  | 9148    | 2 | .                                                                                                                                                                                                                                                                                                                                                                                                             |
| 12 | 55472521 | 55477506  | 4986    | 2 | .                                                                                                                                                                                                                                                                                                                                                                                                             |
| 12 | 55477506 | 55508881  | 31376   | 2 | .                                                                                                                                                                                                                                                                                                                                                                                                             |
| 12 | 55508881 | 55509247  | 367     | 2 | .                                                                                                                                                                                                                                                                                                                                                                                                             |
| 12 | 55509247 | 55515543  | 6297    | 3 | .                                                                                                                                                                                                                                                                                                                                                                                                             |
| 12 | 55515543 | 55538706  | 23164   | 3 | .                                                                                                                                                                                                                                                                                                                                                                                                             |
| 12 | 55538706 | 55588322  | 49617   | 3 | .                                                                                                                                                                                                                                                                                                                                                                                                             |
| 12 | 55588322 | 55661418  | 73097   | 3 | TRNAW-CCA                                                                                                                                                                                                                                                                                                                                                                                                     |
| 12 | 55661418 | 55666219  | 4802    | 3 | .                                                                                                                                                                                                                                                                                                                                                                                                             |
| 12 | 55666219 | 55672035  | 5817    | 3 | .                                                                                                                                                                                                                                                                                                                                                                                                             |
| 12 | 55672035 | 55672210  | 176     | 3 | .                                                                                                                                                                                                                                                                                                                                                                                                             |
| 12 | 55672210 | 55754907  | 82698   | 3 | LOC614423                                                                                                                                                                                                                                                                                                                                                                                                     |
| 12 | 55754907 | 55856189  | 101283  | 3 | LOC107133001 SPRY2                                                                                                                                                                                                                                                                                                                                                                                            |
| 12 | 55856189 | 55877673  | 21485   | 3 | TRNAG-UCC                                                                                                                                                                                                                                                                                                                                                                                                     |
| 12 | 55877673 | 55922400  | 44728   | 3 | .                                                                                                                                                                                                                                                                                                                                                                                                             |
| 12 | 55922400 | 55939474  | 17075   | 2 | LOC104976344                                                                                                                                                                                                                                                                                                                                                                                                  |
| 12 | 55939474 | 55965662  | 26189   | 2 | LOC104976344                                                                                                                                                                                                                                                                                                                                                                                                  |
| 12 | 55965662 | 55967484  | 1823    | 2 | LOC104976344                                                                                                                                                                                                                                                                                                                                                                                                  |
| 12 | 55967484 | 55969726  | 2243    | 2 | LOC104976344                                                                                                                                                                                                                                                                                                                                                                                                  |
| 12 | 70372587 | 70372981  | 395     | 3 | LOC515333                                                                                                                                                                                                                                                                                                                                                                                                     |
| 12 | 70372981 | 70374360  | 1380    | 4 | LOC515333                                                                                                                                                                                                                                                                                                                                                                                                     |
| 12 | 70374360 | 70374899  | 540     | 4 | LOC515333                                                                                                                                                                                                                                                                                                                                                                                                     |
| 12 | 70374899 | 70375199  | 301     | 4 | LOC515333                                                                                                                                                                                                                                                                                                                                                                                                     |
| 12 | 70375199 | 70376645  | 1447    | 4 | LOC515333                                                                                                                                                                                                                                                                                                                                                                                                     |
| 12 | 70376645 | 70381901  | 5257    | 4 | LOC515333                                                                                                                                                                                                                                                                                                                                                                                                     |
| 12 | 70381901 | 70390764  | 8864    | 5 | LOC515333                                                                                                                                                                                                                                                                                                                                                                                                     |
| 12 | 70390764 | 70404034  | 13271   | 5 | LOC515333                                                                                                                                                                                                                                                                                                                                                                                                     |
| 12 | 70404034 | 70404416  | 383     | 5 | LOC515333                                                                                                                                                                                                                                                                                                                                                                                                     |
| 12 | 70404416 | 70405761  | 1346    | 5 | LOC515333                                                                                                                                                                                                                                                                                                                                                                                                     |
| 12 | 70405761 | 70414629  | 8869    | 4 | LOC515333                                                                                                                                                                                                                                                                                                                                                                                                     |
| 12 | 70414629 | 70423556  | 8928    | 4 | .                                                                                                                                                                                                                                                                                                                                                                                                             |
| 12 | 70423556 | 70440976  | 17421   | 5 | .                                                                                                                                                                                                                                                                                                                                                                                                             |
| 12 | 70440976 | 70444039  | 3064    | 6 | .                                                                                                                                                                                                                                                                                                                                                                                                             |
| 12 | 70444039 | 70454402  | 10364   | 5 | .                                                                                                                                                                                                                                                                                                                                                                                                             |
| 12 | 70454402 | 70488945  | 34544   | 4 | .                                                                                                                                                                                                                                                                                                                                                                                                             |
| 12 | 70488945 | 70497990  | 9046    | 4 | .                                                                                                                                                                                                                                                                                                                                                                                                             |

|    |          |          |         |    |                                                                                                                                                                                                                                                         |
|----|----------|----------|---------|----|---------------------------------------------------------------------------------------------------------------------------------------------------------------------------------------------------------------------------------------------------------|
| 12 | 70497990 | 70572258 | 74269   | 4  | LOC100336951                                                                                                                                                                                                                                            |
| 12 | 71248881 | 71506201 | 257321  | 2  | LOC100336232 LOC100848700 LOC101902419 LOC107133006                                                                                                                                                                                                     |
| 12 | 71506201 | 71671198 | 164998  | 2  | LOC100336999 LOC100848700                                                                                                                                                                                                                               |
| 12 | 71671198 | 71942344 | 271147  | 2  | LOC100298891 LOC100336999 LOC100337006                                                                                                                                                                                                                  |
| 12 | 72474848 | 72508883 | 34036   | 2  | LOC100337053 LOC100850004                                                                                                                                                                                                                               |
| 12 | 72590708 | 72598620 | 7913    | 2  | LOC100337069                                                                                                                                                                                                                                            |
| 12 | 72598620 | 72615021 | 16402   | 3  | LOC100337069                                                                                                                                                                                                                                            |
| 12 | 72615021 | 72626512 | 11492   | 4  | LOC100337069                                                                                                                                                                                                                                            |
| 12 | 72626512 | 72692021 | 65510   | 5  | LOC100337069 LOC101902505                                                                                                                                                                                                                               |
| 12 | 72692021 | 72739795 | 47775   | 7  | .                                                                                                                                                                                                                                                       |
| 12 | 72739795 | 72742095 | 2301    | 8  | .                                                                                                                                                                                                                                                       |
| 12 | 72742095 | 72742566 | 472     | 9  | .                                                                                                                                                                                                                                                       |
| 12 | 72742566 | 73124296 | 381731  | 8  | LOC100337076 LOC100337108 LOC100848914 LOC104969875 LOC530803 TRNAC-GCA                                                                                                                                                                                 |
| 12 | 73124296 | 74360279 | 1235984 | 10 | LOC100299180 LOC100337129 LOC101902555 LOC101902625 LOC101904517<br>LOC101908868 LOC104969875 LOC104970090 LOC104970255 LOC104970322<br>LOC104970696 LOC107131247 LOC107131259 LOC107131271 LOC107131276<br>LOC107131284 LOC107131396 LOC789637 MIR3141 |
| 12 | 74360279 | 74828299 | 468021  | 9  | LOC100847245 LOC101902687 LOC104970365 LOC104973638 LOC107131255<br>LOC107131271 LOC107133007 LOC107133008 LOC520016 LOC790322                                                                                                                          |
| 12 | 74828299 | 75318435 | 490137  | 9  | LOC100337244 LOC107133009 LOC107133010 LOC509854 LOC520016                                                                                                                                                                                              |
| 12 | 75318435 | 75667025 | 348591  | 8  | LOC100847383 LOC101902837 LOC101906170 LOC107131256 LOC107131273<br>LOC506823 LOC509854                                                                                                                                                                 |
| 12 | 75667025 | 75682157 | 15133   | 8  | .                                                                                                                                                                                                                                                       |
| 12 | 75682157 | 75744655 | 62499   | 8  | LOC100337292                                                                                                                                                                                                                                            |
| 12 | 75744655 | 75769234 | 24580   | 8  | LOC101906567                                                                                                                                                                                                                                            |
| 12 | 75769234 | 75957740 | 188507  | 9  | LOC100296113 LOC101906567 LOC101908758 LOC104973640 LOC107133011<br>LOC522174                                                                                                                                                                           |
| 12 | 75957740 | 76192411 | 234672  | 9  | LOC101906812 LOC104969731 LOC523126                                                                                                                                                                                                                     |
| 12 | 76192411 | 76239846 | 47436   | 9  | LOC523126                                                                                                                                                                                                                                               |
| 12 | 76239846 | 76316144 | 76299   | 9  | LOC100847548                                                                                                                                                                                                                                            |
| 12 | 76316144 | 76421981 | 105838  | 9  | LOC100847548 LOC101906931 LOC101907065 LOC104973641                                                                                                                                                                                                     |
| 12 | 76421981 | 76835626 | 413646  | 9  | LOC100335848 LOC100337390 LOC101902894 LOC101907065 LOC101907355<br>LOC101909319 LOC101909342 LOC104970697 LOC107133012 LOC107133013<br>LOC530437                                                                                                       |
| 12 | 76835626 | 76983325 | 147700  | 8  | LOC101907471 LOC616707                                                                                                                                                                                                                                  |
| 12 | 76983325 | 77084292 | 100968  | 8  | LOC100851360 LOC101903448 LOC104970698 LOC527057                                                                                                                                                                                                        |
| 12 | 77084292 | 77110586 | 26295   | 8  | LOC101903448                                                                                                                                                                                                                                            |
| 12 | 77110586 | 77138628 | 28043   | 7  | CLDN10 LOC101903448                                                                                                                                                                                                                                     |
| 12 | 77138628 | 77146359 | 7732    | 6  | CLDN10                                                                                                                                                                                                                                                  |
| 12 | 77146359 | 77151877 | 5519    | 5  | CLDN10                                                                                                                                                                                                                                                  |
| 12 | 77151877 | 77159609 | 7733    | 4  | CLDN10                                                                                                                                                                                                                                                  |
| 12 | 77159609 | 77164744 | 5136    | 4  | CLDN10 LOC104973643                                                                                                                                                                                                                                     |
| 12 | 77164744 | 77180349 | 15606   | 4  | CLDN10                                                                                                                                                                                                                                                  |
| 12 | 77180349 | 77208462 | 28114   | 4  | CLDN10                                                                                                                                                                                                                                                  |
| 12 | 77208462 | 77215792 | 7331    | 4  | CLDN10                                                                                                                                                                                                                                                  |
| 12 | 77215792 | 77222993 | 7202    | 4  | CLDN10                                                                                                                                                                                                                                                  |
| 12 | 77222993 | 77223831 | 839     | 4  | CLDN10                                                                                                                                                                                                                                                  |
| 12 | 77223831 | 77254667 | 30837   | 4  | CLDN10 DZIP1                                                                                                                                                                                                                                            |
| 12 | 77254667 | 77283755 | 29089   | 4  | DZIP1                                                                                                                                                                                                                                                   |
| 12 | 77283755 | 77286290 | 2536    | 4  | DZIP1                                                                                                                                                                                                                                                   |
| 12 | 77286290 | 77305962 | 19673   | 4  | DZIP1                                                                                                                                                                                                                                                   |
| 12 | 77305962 | 77311859 | 5898    | 4  | .                                                                                                                                                                                                                                                       |
| 12 | 77311859 | 77323832 | 11974   | 4  | LOC785064                                                                                                                                                                                                                                               |
| 12 | 77323832 | 77328079 | 4248    | 4  | .                                                                                                                                                                                                                                                       |
| 12 | 77328079 | 77328353 | 275     | 4  | .                                                                                                                                                                                                                                                       |
| 12 | 77328353 | 77331474 | 3122    | 4  | .                                                                                                                                                                                                                                                       |
| 12 | 77331474 | 77337002 | 5529    | 4  | DNAJC3                                                                                                                                                                                                                                                  |
| 12 | 77337002 | 77350199 | 13198   | 4  | DNAJC3                                                                                                                                                                                                                                                  |
| 12 | 77350199 | 77351876 | 1678    | 4  | DNAJC3                                                                                                                                                                                                                                                  |
| 12 | 77351876 | 77352964 | 1089    | 4  | DNAJC3                                                                                                                                                                                                                                                  |
| 12 | 77352964 | 77356055 | 3092    | 4  | DNAJC3                                                                                                                                                                                                                                                  |
| 12 | 77356055 | 77362214 | 6160    | 4  | DNAJC3                                                                                                                                                                                                                                                  |
| 12 | 77362214 | 77363175 | 962     | 5  | DNAJC3                                                                                                                                                                                                                                                  |
| 12 | 77363175 | 77363579 | 405     | 6  | DNAJC3                                                                                                                                                                                                                                                  |
| 12 | 77363579 | 77364041 | 463     | 5  | DNAJC3                                                                                                                                                                                                                                                  |
| 12 | 77364041 | 77402048 | 38008   | 4  | DNAJC3                                                                                                                                                                                                                                                  |
| 12 | 77402048 | 77406930 | 4883    | 4  | UGGT2                                                                                                                                                                                                                                                   |
| 12 | 77406930 | 77427307 | 20378   | 4  | UGGT2                                                                                                                                                                                                                                                   |
| 12 | 77427307 | 77427739 | 433     | 4  | UGGT2                                                                                                                                                                                                                                                   |
| 12 | 77427739 | 77437194 | 9456    | 4  | UGGT2                                                                                                                                                                                                                                                   |
| 12 | 77437194 | 77439412 | 2219    | 4  | UGGT2                                                                                                                                                                                                                                                   |
| 12 | 77439412 | 77462516 | 23105   | 4  | UGGT2                                                                                                                                                                                                                                                   |
| 12 | 77462516 | 77504916 | 42401   | 4  | UGGT2                                                                                                                                                                                                                                                   |
| 12 | 77504916 | 77519177 | 14262   | 4  | UGGT2                                                                                                                                                                                                                                                   |
| 12 | 77519177 | 77524301 | 5125    | 4  | UGGT2                                                                                                                                                                                                                                                   |
| 12 | 77524301 | 77532233 | 7933    | 4  | UGGT2                                                                                                                                                                                                                                                   |
| 12 | 77532233 | 77547001 | 14769   | 3  | UGGT2                                                                                                                                                                                                                                                   |
| 12 | 77547001 | 77557892 | 10892   | 3  | UGGT2                                                                                                                                                                                                                                                   |
| 12 | 77557892 | 77566741 | 8850    | 2  | .                                                                                                                                                                                                                                                       |
| 12 | 77566741 | 77577160 | 10420   | 2  | .                                                                                                                                                                                                                                                       |
| 12 | 77577160 | 77578469 | 1310    | 2  | .                                                                                                                                                                                                                                                       |
| 12 | 87440367 | 87440909 | 543     | 2  | .                                                                                                                                                                                                                                                       |
| 12 | 87889766 | 87939946 | 50181   | 2  | .                                                                                                                                                                                                                                                       |
| 12 | 87939946 | 87940714 | 769     | 2  | .                                                                                                                                                                                                                                                       |
| 12 | 87940714 | 87985678 | 44965   | 2  | .                                                                                                                                                                                                                                                       |
| 12 | 88104642 | 88118906 | 14265   | 2  | LOC107131142                                                                                                                                                                                                                                            |
| 12 | 88118906 | 88139033 | 20128   | 2  | .                                                                                                                                                                                                                                                       |



|    |          |          |        |   |                      |
|----|----------|----------|--------|---|----------------------|
| 12 | 88139033 | 88142755 | 3723   | 2 | .                    |
| 12 | 88142755 | 88145354 | 2600   | 2 | .                    |
| 12 | 88145354 | 88203388 | 58035  | 2 | .                    |
| 12 | 88203388 | 88204359 | 972    | 2 | .                    |
| 12 | 88303286 | 88312967 | 9682   | 2 | .                    |
| 12 | 88312967 | 88373387 | 60421  | 2 | MYO16                |
| 12 | 88470650 | 88480564 | 9915   | 2 | MYO16                |
| 12 | 88480564 | 88485972 | 5409   | 2 | MYO16                |
| 12 | 88485972 | 88578709 | 92738  | 2 | LOC104973670 MYO16   |
| 12 | 88578709 | 88594536 | 15828  | 3 | MYO16                |
| 12 | 88594536 | 88604196 | 9661   | 2 | MYO16                |
| 12 | 88604196 | 88609662 | 5467   | 2 | MYO16                |
| 12 | 88609662 | 88654866 | 45205  | 2 | MYO16                |
| 12 | 88654866 | 88655578 | 713    | 2 | MYO16                |
| 12 | 88655578 | 88750752 | 95175  | 2 | MYO16 TRNAY-AUA      |
| 12 | 88750752 | 88755266 | 4515   | 2 | .                    |
| 12 | 90144735 | 90147454 | 2720   | 2 | .                    |
| 12 | 90147454 | 90169116 | 21663  | 2 | .                    |
| 12 | 90169116 | 90177829 | 8714   | 2 | .                    |
| 12 | 90177829 | 90178871 | 1043   | 2 | .                    |
| 12 | 90178871 | 90196246 | 17376  | 2 | .                    |
| 12 | 90196246 | 90223606 | 27361  | 2 | .                    |
| 12 | 90223606 | 90227672 | 4067   | 2 | .                    |
| 12 | 90227672 | 90231301 | 3630   | 2 | .                    |
| 12 | 90231301 | 90239718 | 8418   | 2 | .                    |
| 12 | 90239718 | 90240042 | 325    | 2 | .                    |
| 12 | 90240042 | 90325214 | 85173  | 2 | .                    |
| 12 | 90325214 | 90335488 | 10275  | 2 | .                    |
| 12 | 90335488 | 90356932 | 21445  | 3 | .                    |
| 12 | 90356932 | 90393417 | 36486  | 3 | .                    |
| 12 | 90393417 | 90394235 | 819    | 3 | .                    |
| 12 | 90394235 | 90397636 | 3402   | 3 | .                    |
| 12 | 90397636 | 90398629 | 994    | 4 | .                    |
| 12 | 90398629 | 90398785 | 157    | 5 | .                    |
| 12 | 90398785 | 90399181 | 397    | 3 | .                    |
| 12 | 90399181 | 90412126 | 12946  | 3 | .                    |
| 12 | 90412126 | 90425843 | 13718  | 3 | .                    |
| 12 | 90425843 | 90459955 | 34113  | 3 | SOX1                 |
| 12 | 90459955 | 90478469 | 18515  | 3 | SOX1                 |
| 12 | 90478469 | 90483375 | 4907   | 3 | LOC100852089         |
| 12 | 90483375 | 90517367 | 33993  | 3 | LOC100852089         |
| 12 | 90517367 | 90517773 | 407    | 3 | .                    |
| 12 | 90517773 | 90518065 | 293    | 4 | .                    |
| 12 | 90518065 | 90526217 | 8153   | 3 | .                    |
| 12 | 90526217 | 90534690 | 8474   | 3 | .                    |
| 12 | 90534690 | 90535785 | 1096   | 4 | .                    |
| 12 | 90535785 | 90574783 | 38999  | 3 | .                    |
| 12 | 90574783 | 90588530 | 13748  | 3 | .                    |
| 12 | 90588530 | 90591615 | 3086   | 3 | .                    |
| 12 | 90591615 | 90597956 | 6342   | 3 | .                    |
| 12 | 90597956 | 90598123 | 168    | 4 | .                    |
| 12 | 90598123 | 90630377 | 32255  | 3 | SPACA7 TUBGCP3       |
| 12 | 90630377 | 90642641 | 12265  | 3 | TUBGCP3              |
| 12 | 90642641 | 90690404 | 47764  | 3 | LOC104973680 TUBGCP3 |
| 12 | 90690404 | 90691111 | 708    | 3 | LOC104973680         |
| 12 | 90691111 | 90703265 | 12155  | 3 | LOC104973680         |
| 12 | 90703265 | 90706538 | 3274   | 3 | .                    |
| 12 | 90706538 | 90712146 | 5609   | 3 | .                    |
| 12 | 90712146 | 90714860 | 2715   | 2 | .                    |
| 12 | 90714860 | 90722955 | 8096   | 2 | .                    |
| 13 | 1213601  | 1221686  | 8086   | 2 | PLCB1                |
| 13 | 1221686  | 1259118  | 37433  | 2 | PLCB1                |
| 13 | 1259118  | 1296348  | 37231  | 2 | PLCB1                |
| 13 | 1296348  | 1368940  | 72593  | 2 | PLCB1                |
| 13 | 1368940  | 1485557  | 116618 | 2 | MIR2285M-1 PLCB1     |
| 13 | 1485557  | 1489035  | 3479   | 3 | PLCB1                |
| 13 | 1489035  | 1511332  | 22298  | 3 | PLCB1                |
| 13 | 1511332  | 1582165  | 70834  | 5 | PLCB1                |
| 13 | 1582165  | 1608212  | 26048  | 5 | PLCB1                |
| 13 | 1608212  | 1624849  | 16638  | 5 | PLCB1                |
| 13 | 1624849  | 1630911  | 6063   | 5 | PLCB1                |
| 13 | 1630911  | 1648133  | 17223  | 4 | PLCB1                |
| 13 | 1648133  | 1683212  | 35080  | 3 | PLCB1                |
| 13 | 1683212  | 1683930  | 719    | 3 | PLCB1                |
| 13 | 1683930  | 1773122  | 89193  | 3 | PLCB1                |
| 13 | 1773122  | 1773355  | 234    | 4 | .                    |
| 13 | 1773355  | 1806641  | 33287  | 3 | .                    |
| 13 | 1806641  | 1848482  | 41842  | 3 | .                    |
| 13 | 1848482  | 1863072  | 14591  | 3 | .                    |
| 13 | 1863072  | 1915589  | 52518  | 3 | .                    |
| 13 | 1915589  | 1965025  | 49437  | 3 | .                    |
| 13 | 1965025  | 1966105  | 1081   | 3 | .                    |
| 13 | 1966105  | 1984515  | 18411  | 3 | .                    |
| 13 | 1984515  | 1993557  | 9043   | 3 | .                    |
| 13 | 1993557  | 2022227  | 28671  | 3 | .                    |
| 13 | 2022227  | 2022949  | 723    | 3 | .                    |
| 13 | 2022949  | 2036423  | 13475  | 3 | .                    |
| 13 | 2036423  | 2119832  | 83410  | 2 | .                    |
| 13 | 2119832  | 2123245  | 3414   | 2 | LOC107133021         |
| 13 | 2123245  | 2132048  | 8804   | 2 | LOC107133021         |
| 13 | 2132048  | 2152577  | 20530  | 2 | LOC107133021         |

|    |         |         |        |   |                          |
|----|---------|---------|--------|---|--------------------------|
| 13 | 2152577 | 2195316 | 42740  | 2 | .                        |
| 13 | 2195316 | 2221349 | 26034  | 2 | .                        |
| 13 | 2221349 | 2254340 | 32992  | 4 | PLCB4                    |
| 13 | 2254340 | 2293290 | 38951  | 4 | PLCB4                    |
| 13 | 2293290 | 2295790 | 2501   | 4 | PLCB4                    |
| 13 | 2295790 | 2344013 | 48224  | 4 | PLCB4                    |
| 13 | 2344013 | 2361424 | 17412  | 3 | PLCB4                    |
| 13 | 2361424 | 2363134 | 1711   | 3 | PLCB4                    |
| 13 | 2363134 | 2382502 | 19369  | 3 | PLCB4                    |
| 13 | 2382502 | 2383537 | 1036   | 4 | PLCB4                    |
| 13 | 2383537 | 2402674 | 19138  | 3 | PLCB4                    |
| 13 | 2402674 | 2412938 | 10265  | 3 | PLCB4                    |
| 13 | 2412938 | 2448431 | 35494  | 3 | PLCB4                    |
| 13 | 2448431 | 2485562 | 37132  | 3 | LAMP5                    |
| 13 | 2485562 | 2493843 | 8282   | 3 | PAK7                     |
| 13 | 2493843 | 2502720 | 8878   | 3 | PAK7                     |
| 13 | 2502720 | 2503465 | 746    | 5 | PAK7                     |
| 13 | 2503465 | 2503923 | 459    | 4 | PAK7                     |
| 13 | 2503923 | 2518726 | 14804  | 2 | PAK7                     |
| 13 | 2518726 | 2551367 | 32642  | 2 | PAK7                     |
| 13 | 2551367 | 2577880 | 26514  | 2 | MGC148692                |
| 13 | 2577880 | 2595791 | 17912  | 2 | .                        |
| 13 | 2595791 | 2658625 | 62835  | 3 | LOC104973690             |
| 13 | 2658625 | 2745880 | 87256  | 3 | LOC104973690             |
| 13 | 2745880 | 2816505 | 70626  | 3 | LOC104973690             |
| 13 | 2816505 | 2860725 | 44221  | 3 | LOC104973690             |
| 13 | 2860725 | 2896751 | 36027  | 4 | LOC104973690             |
| 13 | 2896751 | 2901799 | 5049   | 4 | LOC104973690             |
| 13 | 2901799 | 2967947 | 66149  | 4 | LOC104973690 LOC783610   |
| 13 | 2967947 | 2974611 | 6665   | 4 | .                        |
| 13 | 2974611 | 3042196 | 67586  | 4 | .                        |
| 13 | 3042196 | 3099897 | 57702  | 5 | LOC100848820             |
| 13 | 3099897 | 3145736 | 45840  | 5 | .                        |
| 13 | 3145736 | 3146885 | 1150   | 5 | .                        |
| 13 | 3146885 | 3265900 | 119016 | 5 | ANKEF1                   |
| 13 | 3265900 | 3268583 | 2684   | 5 | .                        |
| 13 | 3268583 | 3271834 | 3252   | 5 | .                        |
| 13 | 3271834 | 3274583 | 2750   | 4 | .                        |
| 13 | 3274583 | 3287390 | 12808  | 4 | .                        |
| 13 | 3287390 | 3315522 | 28133  | 4 | .                        |
| 13 | 3315522 | 3356491 | 40970  | 4 | .                        |
| 13 | 3356491 | 3375175 | 18685  | 4 | .                        |
| 13 | 3375175 | 3447059 | 71885  | 4 | SNAP25                   |
| 13 | 3447059 | 3450567 | 3509   | 3 | SNAP25                   |
| 13 | 3450567 | 3511948 | 61382  | 3 | SNAP25                   |
| 13 | 3511948 | 3526752 | 14805  | 3 | .                        |
| 13 | 3526752 | 3535203 | 8452   | 3 | .                        |
| 13 | 3535203 | 3535988 | 786    | 4 | .                        |
| 13 | 3535988 | 3536323 | 336    | 3 | .                        |
| 13 | 3536323 | 3549188 | 12866  | 3 | .                        |
| 13 | 3549188 | 3673770 | 124583 | 3 | MKKS SLX4IP              |
| 13 | 3673770 | 3674476 | 707    | 2 | SLX4IP                   |
| 13 | 3674476 | 3692788 | 18313  | 3 | SLX4IP                   |
| 13 | 3692788 | 3696158 | 3371   | 3 | SLX4IP                   |
| 13 | 3696158 | 3722113 | 25956  | 3 | SLX4IP                   |
| 13 | 3722113 | 3734628 | 12516  | 3 | SLX4IP                   |
| 13 | 3734628 | 3746919 | 12292  | 3 | SLX4IP                   |
| 13 | 3746919 | 3786349 | 39431  | 3 | SLX4IP                   |
| 13 | 3786349 | 3790198 | 3850   | 2 | SLX4IP                   |
| 13 | 3790198 | 3906900 | 116703 | 3 | JAG1 LOC107133024 SLX4IP |
| 13 | 3906900 | 3974951 | 68052  | 3 | .                        |
| 13 | 3974951 | 3997987 | 23037  | 4 | .                        |
| 13 | 3997987 | 4031425 | 33439  | 3 | .                        |
| 13 | 4031425 | 4034667 | 3243   | 3 | .                        |
| 13 | 4034667 | 4097575 | 62909  | 3 | LOC101901915             |
| 13 | 4097575 | 4099119 | 1545   | 3 | LOC101901915             |
| 13 | 4099119 | 4303176 | 204058 | 3 | LOC101901915             |
| 13 | 4303176 | 4305955 | 2780   | 3 | .                        |
| 13 | 4305955 | 4375705 | 69751  | 3 | LOC104973695             |
| 13 | 4375705 | 4438070 | 62366  | 5 | .                        |
| 13 | 4438070 | 4520341 | 82272  | 5 | .                        |
| 13 | 4520341 | 4535920 | 15580  | 5 | .                        |
| 13 | 4535920 | 4536849 | 930    | 6 | .                        |
| 13 | 4536849 | 4551670 | 14822  | 5 | .                        |
| 13 | 4551670 | 4582200 | 30531  | 6 | .                        |
| 13 | 4582200 | 4583755 | 1556   | 6 | .                        |
| 13 | 4583755 | 4584695 | 941    | 6 | .                        |
| 13 | 4584695 | 4593220 | 8526   | 5 | .                        |
| 13 | 4593220 | 4610411 | 17192  | 5 | .                        |
| 13 | 4610411 | 4627870 | 17460  | 4 | .                        |
| 13 | 4627870 | 4630692 | 2823   | 5 | .                        |
| 13 | 4630692 | 4631609 | 918    | 4 | .                        |
| 13 | 4631609 | 4667054 | 35446  | 4 | .                        |
| 13 | 4667054 | 4679888 | 12835  | 4 | .                        |
| 13 | 4679888 | 4695316 | 15429  | 4 | .                        |
| 13 | 4695316 | 4714244 | 18929  | 4 | .                        |
| 13 | 4714244 | 4721456 | 7213   | 4 | .                        |
| 13 | 4721456 | 4723810 | 2355   | 3 | .                        |
| 13 | 4723810 | 4734314 | 10505  | 3 | .                        |
| 13 | 4734314 | 4757557 | 23244  | 4 | .                        |
| 13 | 4757557 | 4920647 | 163091 | 4 | LOC101902229             |

|    |          |          |         |   |                                                                                           |
|----|----------|----------|---------|---|-------------------------------------------------------------------------------------------|
| 13 | 4920647  | 4923453  | 2807    | 4 | .                                                                                         |
| 13 | 4923453  | 4959703  | 36251   | 4 | .                                                                                         |
| 13 | 4959703  | 4968340  | 8638    | 4 | .                                                                                         |
| 13 | 4968340  | 4992364  | 24025   | 5 | .                                                                                         |
| 13 | 4992364  | 5021163  | 28800   | 5 | .                                                                                         |
| 13 | 5021163  | 5027195  | 6033    | 5 | .                                                                                         |
| 13 | 5027195  | 5053560  | 26366   | 5 | .                                                                                         |
| 13 | 5053560  | 5071077  | 17518   | 5 | .                                                                                         |
| 13 | 5071077  | 5084825  | 13749   | 5 | .                                                                                         |
| 13 | 5084825  | 5142618  | 57794   | 5 | .                                                                                         |
| 13 | 5142618  | 5151129  | 8512    | 5 | .                                                                                         |
| 13 | 5151129  | 5159424  | 8296    | 5 | .                                                                                         |
| 13 | 5159424  | 5224823  | 65400   | 4 | .                                                                                         |
| 13 | 5224823  | 5275685  | 50863   | 3 | .                                                                                         |
| 13 | 5275685  | 5277206  | 1522    | 3 | .                                                                                         |
| 13 | 5277206  | 5277383  | 178     | 3 | .                                                                                         |
| 13 | 5277383  | 5278615  | 1233    | 3 | .                                                                                         |
| 13 | 5278615  | 5361778  | 83164   | 3 | .                                                                                         |
| 13 | 5361778  | 5636886  | 275109  | 3 | BTBD3 SRY                                                                                 |
| 13 | 5636886  | 5674788  | 37903   | 2 | BTBD3                                                                                     |
| 13 | 5674788  | 5679287  | 4500    | 2 | .                                                                                         |
| 13 | 5679287  | 5828640  | 149354  | 2 | LOC104973698                                                                              |
| 13 | 5828640  | 5891502  | 62863   | 3 | .                                                                                         |
| 13 | 5891502  | 5923491  | 31990   | 4 | .                                                                                         |
| 13 | 5923491  | 5968879  | 45389   | 4 | LOC107133022                                                                              |
| 13 | 5968879  | 6002950  | 34072   | 4 | .                                                                                         |
| 13 | 6002950  | 6035591  | 32642   | 4 | .                                                                                         |
| 13 | 6035591  | 6053030  | 17440   | 4 | .                                                                                         |
| 13 | 6053030  | 6055122  | 2093    | 4 | .                                                                                         |
| 13 | 6055122  | 6097079  | 41958   | 4 | .                                                                                         |
| 13 | 6097079  | 6128968  | 31890   | 4 | .                                                                                         |
| 13 | 6128968  | 6152871  | 23904   | 4 | .                                                                                         |
| 13 | 6152871  | 6187497  | 34627   | 4 | .                                                                                         |
| 13 | 6187497  | 6194645  | 7149    | 4 | .                                                                                         |
| 13 | 6194645  | 6209996  | 15352   | 3 | .                                                                                         |
| 13 | 6209996  | 6223937  | 13942   | 3 | .                                                                                         |
| 13 | 6223937  | 6264085  | 40149   | 3 | .                                                                                         |
| 13 | 6264085  | 6293737  | 29653   | 3 | .                                                                                         |
| 13 | 6293737  | 6334452  | 40716   | 3 | .                                                                                         |
| 13 | 6334452  | 6433842  | 99391   | 3 | .                                                                                         |
| 13 | 6433842  | 6457291  | 23450   | 3 | .                                                                                         |
| 13 | 6457291  | 6496990  | 39700   | 3 | .                                                                                         |
| 13 | 6496990  | 6647755  | 150766  | 3 | LOC107133023                                                                              |
| 13 | 6647755  | 6690331  | 42577   | 3 | LOC107133023                                                                              |
| 13 | 6690331  | 6734185  | 43855   | 3 | .                                                                                         |
| 13 | 6734185  | 6745492  | 11308   | 3 | .                                                                                         |
| 13 | 6745492  | 6841374  | 95883   | 3 | LOC107133025 SPTLC3                                                                       |
| 13 | 6841374  | 6874944  | 33571   | 3 | SPTLC3                                                                                    |
| 13 | 6874944  | 6932785  | 57842   | 2 | SPTLC3                                                                                    |
| 13 | 6932785  | 6996843  | 64059   | 2 | ISM1 SPTLC3                                                                               |
| 13 | 6996843  | 7051927  | 55085   | 2 | ISM1                                                                                      |
| 13 | 7051927  | 7052707  | 781     | 2 | ISM1                                                                                      |
| 13 | 7052707  | 7098584  | 45878   | 2 | ISM1                                                                                      |
| 13 | 7098584  | 7100258  | 1675    | 2 | .                                                                                         |
| 13 | 7100258  | 7167553  | 67296   | 2 | TASP1                                                                                     |
| 14 | 33359502 | 33670520 | 311019  | 2 | ARFGEF1 COPS5 CSPP1 PPP1R42 TCF24                                                         |
| 14 | 33670520 | 33894951 | 224432  | 2 | ARFGEF1 CPA6 LOC101902584 TRNAC-GCA                                                       |
| 14 | 33894951 | 34063319 | 168369  | 2 | CPA6                                                                                      |
| 14 | 34063319 | 34425945 | 362627  | 2 | CPA6 PREX2                                                                                |
| 14 | 34425945 | 34545262 | 119318  | 3 | PREX2                                                                                     |
| 14 | 34545262 | 34581708 | 36447   | 2 | PREX2                                                                                     |
| 14 | 34581708 | 34630905 | 49198   | 2 | LOC100337031                                                                              |
| 14 | 56805392 | 57883901 | 1078510 | 3 | EBAG9 ENV2 KCN1 LOC104974087 LOC107133125 LOC521950 LOC785158 NUDCD1<br>PKHD1L1 SYBU TRHR |
| 14 | 57883901 | 57934078 | 50178   | 2 | LOC104974087                                                                              |
| 14 | 57934078 | 58007882 | 73805   | 2 | .                                                                                         |
| 14 | 62247363 | 62638376 | 391014  | 2 | LRP12                                                                                     |
| 14 | 62878562 | 63404244 | 525683  | 2 | RIMS2                                                                                     |
| 14 | 63404244 | 63593594 | 189351  | 2 | DCAF13 LOC104974100 LOC107133127 SLC25A32                                                 |
| 14 | 63593594 | 63747831 | 154238  | 3 | CTHRC1 FZD6 LOC104974101 LOC783954 SLC25A32                                               |
| 14 | 63747831 | 63858038 | 110208  | 2 | BAALC                                                                                     |
| 14 | 63858038 | 64133767 | 275730  | 2 | ATP6V1C1 AZIN1 BAALC LOC104974103 LOC107133126 TRNAS-GGA                                  |
| 14 | 64133767 | 64283925 | 150159  | 2 | LOC107133128 TRNAE-UUC                                                                    |
| 14 | 64283925 | 64724867 | 440943  | 3 | KLF10 LOC104974106 LOC104974107 LOC107133129 ODF1 RRM2B UBR5                              |
| 14 | 64724867 | 64896329 | 171463  | 3 | .                                                                                         |
| 14 | 64896329 | 65212623 | 316295  | 3 | NCALD                                                                                     |
| 14 | 78270424 | 78473275 | 202852  | 2 | CNBD1 LOC100137877 LOC783984                                                              |
| 14 | 78473275 | 78717249 | 243975  | 3 | CNBD1                                                                                     |
| 14 | 78717249 | 78902799 | 185551  | 3 | CNGB3 CPNE3                                                                               |
| 14 | 78902799 | 79039230 | 136432  | 3 | RMDN1 WWP1                                                                                |
| 14 | 79039230 | 79102153 | 62924   | 4 | LOC104974135 WWP1                                                                         |
| 14 | 79102153 | 79610042 | 507890  | 4 | ATP6V0D2 LOC100138079 LOC101903860 LOC104974136 MIR2311 PSKH2 SLC7A13<br>TRNAS-GGA        |
| 14 | 79610042 | 79953854 | 343813  | 3 | CA1 CA2 CA3 LOC100196897 LOC104974137 LOC107133131 LOC784254                              |
| 14 | 79953854 | 79982734 | 28881   | 2 | .                                                                                         |
| 14 | 79982734 | 80211584 | 228851  | 3 | C14H8orf59 CA13 E2F5 LOC100847874 LRRCC1                                                  |
| 14 | 80211584 | 80386909 | 175326  | 3 | LOC107133132 LOC506670 LOC518422 LOC787733 RALYL                                          |
| 14 | 80386909 | 80876099 | 489191  | 4 | RALYL                                                                                     |
| 14 | 81500845 | 81700029 | 199185  | 3 | TRNAS-GGA                                                                                 |
| 14 | 81700029 | 81751649 | 51621   | 4 | .                                                                                         |

|    |          |          |         |   |                                                                                                                                                                                                                                                       |
|----|----------|----------|---------|---|-------------------------------------------------------------------------------------------------------------------------------------------------------------------------------------------------------------------------------------------------------|
| 14 | 81751649 | 81827228 | 75580   | 4 | .                                                                                                                                                                                                                                                     |
| 14 | 81827228 | 81931836 | 104609  | 4 | LOC100138329                                                                                                                                                                                                                                          |
| 14 | 81931836 | 82008428 | 76593   | 4 | .                                                                                                                                                                                                                                                     |
| 14 | 82008428 | 82209714 | 201287  | 4 | .                                                                                                                                                                                                                                                     |
| 14 | 82209714 | 82459104 | 249391  | 3 | .                                                                                                                                                                                                                                                     |
| 14 | 82459104 | 82581008 | 121905  | 4 | .                                                                                                                                                                                                                                                     |
| 14 | 82581008 | 82697711 | 116704  | 3 | .                                                                                                                                                                                                                                                     |
| 14 | 82697711 | 82756524 | 58814   | 3 | .                                                                                                                                                                                                                                                     |
| 14 | 82756524 | 82881023 | 124500  | 3 | .                                                                                                                                                                                                                                                     |
| 14 | 82881023 | 83058730 | 177708  | 2 | .                                                                                                                                                                                                                                                     |
| 15 | 1888766  | 2607577  | 718812  | 2 | GRIA4 KBTBD3 LOC104974155 LOC104974161 MSANTD4                                                                                                                                                                                                        |
| 15 | 2607577  | 2925506  | 317930  | 2 | GRIA4                                                                                                                                                                                                                                                 |
| 15 | 2925506  | 3010968  | 85463   | 2 | .                                                                                                                                                                                                                                                     |
| 15 | 3010968  | 3748993  | 738026  | 2 | CASP1 CASP4 LOC100140955                                                                                                                                                                                                                              |
| 15 | 3748993  | 3781653  | 32661   | 2 | .                                                                                                                                                                                                                                                     |
| 15 | 3781653  | 3843784  | 62132   | 2 | .                                                                                                                                                                                                                                                     |
| 15 | 3843784  | 3927888  | 84105   | 2 | .                                                                                                                                                                                                                                                     |
| 15 | 3927888  | 4269990  | 342103  | 2 | .                                                                                                                                                                                                                                                     |
| 15 | 4269990  | 4359153  | 89164   | 2 | .                                                                                                                                                                                                                                                     |
| 15 | 4359153  | 4563203  | 204051  | 2 | LOC104974160 PDGFD                                                                                                                                                                                                                                    |
| 15 | 4563203  | 4586707  | 23505   | 2 | PDGFD                                                                                                                                                                                                                                                 |
| 15 | 4586707  | 5078465  | 491759  | 2 | DDI1 LOC104974158 PDGFD                                                                                                                                                                                                                               |
| 15 | 5078465  | 6174006  | 1095542 | 2 | DCUN1D5 DYNC2H1 LOC100138231 MMP1 MMP12 MMP13 MMP3 TRNAY-AUA                                                                                                                                                                                          |
| 15 | 6174006  | 6187106  | 13101   | 2 | LOC107131204 MMP1                                                                                                                                                                                                                                     |
| 15 | 7655244  | 7857693  | 202450  | 3 | TRPC6                                                                                                                                                                                                                                                 |
| 15 | 7857693  | 7997685  | 139993  | 4 | LOC787452                                                                                                                                                                                                                                             |
| 15 | 7997685  | 8062538  | 64854   | 4 | .                                                                                                                                                                                                                                                     |
| 15 | 8062538  | 8162827  | 100290  | 4 | .                                                                                                                                                                                                                                                     |
| 15 | 8162827  | 8228964  | 66138   | 4 | LOC107133146 PGR                                                                                                                                                                                                                                      |
| 15 | 8228964  | 8783088  | 554125  | 3 | ARHGAP42 LOC107133147 PGR                                                                                                                                                                                                                             |
| 15 | 8783088  | 8978532  | 195445  | 3 | LOC101903693                                                                                                                                                                                                                                          |
| 15 | 8978532  | 9162231  | 183700  | 3 | LOC782668                                                                                                                                                                                                                                             |
| 15 | 9162231  | 9249998  | 87768   | 3 | .                                                                                                                                                                                                                                                     |
| 15 | 9249998  | 9830178  | 580181  | 3 | CNTN5 LOC107133148                                                                                                                                                                                                                                    |
| 15 | 13447809 | 13996183 | 548375  | 2 | LOC100300167 TRNAW-CCA                                                                                                                                                                                                                                |
| 15 | 13996183 | 14316746 | 320564  | 2 | CCDC82 JRKL LOC101905762 LOC783497 MAML2 MIR1260B                                                                                                                                                                                                     |
| 15 | 14316746 | 15321327 | 1004582 | 2 | CEP57 FAM76B LOC101905912 MAML2 MTMR2                                                                                                                                                                                                                 |
| 15 | 15321327 | 16222714 | 901388  | 2 | AMOTL1 CWC15 ENDOD1 LOC100295831 LOC101906086 LOC104974176<br>LOC107133150 LOC524768 LOC617971 SESN3                                                                                                                                                  |
| 15 | 16222714 | 16322141 | 99428   | 2 | PIWIL4                                                                                                                                                                                                                                                |
| 15 | 16322141 | 16894242 | 572102  | 2 | C15H11orf97 CWF19L2 FUT4 GUCY1A2 LOC107133149                                                                                                                                                                                                         |
| 15 | 17386117 | 17819886 | 433770  | 2 | ALKBH8 ELMOD1 LOC107133151 SLC35F2 SLN                                                                                                                                                                                                                |
| 15 | 17819886 | 18101287 | 281402  | 2 | CUL5 LOC107133152 RAB39A SLC35F2                                                                                                                                                                                                                      |
| 15 | 18101287 | 18365033 | 263747  | 2 | ACAT1 ATM CUL5 NPAT                                                                                                                                                                                                                                   |
| 15 | 18365033 | 18477897 | 112865  | 2 | ATM C15H11orf65                                                                                                                                                                                                                                       |
| 15 | 18477897 | 18697606 | 219710  | 2 | C15H11orf65 EXPH5 KDELC2 LOC101902366                                                                                                                                                                                                                 |
| 15 | 18697606 | 18706947 | 9342    | 2 | EXPH5                                                                                                                                                                                                                                                 |
| 15 | 18706947 | 20055547 | 1348601 | 2 | C15H11orf87 DDX10 EXPH5 LOC786394                                                                                                                                                                                                                     |
| 15 | 20055547 | 20175016 | 119470  | 2 | .                                                                                                                                                                                                                                                     |
| 15 | 20175016 | 20723480 | 548465  | 2 | LOC104974178 LOC783106 LOC784944 TRNAR-CCU ZC3H12C                                                                                                                                                                                                    |
| 15 | 20723480 | 21161982 | 438503  | 2 | ARHGAP20 FDX1 LOC100847607 LOC782951 RDX                                                                                                                                                                                                              |
| 15 | 21161982 | 21625691 | 463710  | 2 | ARHGAP20 LOC783349                                                                                                                                                                                                                                    |
| 15 | 21625691 | 21693863 | 68173   | 2 | .                                                                                                                                                                                                                                                     |
| 15 | 21693863 | 21900494 | 206632  | 2 | .                                                                                                                                                                                                                                                     |
| 15 | 21900494 | 22192784 | 292291  | 2 | C15H11orf53 COLCA2 POU2AF1                                                                                                                                                                                                                            |
| 15 | 22192784 | 22695068 | 502285  | 2 | ALG9 BTG4 C15H11orf1 C15H11orf88 FDXACB1 LAYN LOC101906330 MIR34B MIR34C<br>PPP2R1B SIK2 TRNAE-CUC                                                                                                                                                    |
| 15 | 22695068 | 22988949 | 293882  | 2 | BCO2 C15H11orf1 C15H11orf52 C15H11orf57 CRYAB DIXDC1 DLAT HSPB2 IL18<br>LOC101903059 LOC101903125 LOC101906594 LOC104968480 LOC104974189 PIH1D2<br>SDHD TEX12 TIMM8B                                                                                  |
| 15 | 22988949 | 23101598 | 112650  | 2 | BCO2 PTS                                                                                                                                                                                                                                              |
| 15 | 23101598 | 25651730 | 2550133 | 2 | ANKK1 C15H11orf34 C15H11orf71 CLDN25 DRD2 FAM55A HTR3A HTR3B<br>LOC100847772 LOC101903190 LOC101907641 LOC104974191 LOC107133153<br>LOC511161 LOC781913 LOC782610 LOC787274 NCAM1 NXPE2 NXPE4 RBM7 REXO2<br>TMPRSS5 TRNAG-CCC TTC12 USP28 ZBTB16 ZW10 |
| 15 | 25651730 | 25711833 | 60104   | 2 | LOC510786 NXPE2                                                                                                                                                                                                                                       |
| 15 | 25711833 | 26775912 | 1064080 | 2 | CADM1 LOC101908225 LOC104974202                                                                                                                                                                                                                       |
| 15 | 26775912 | 26967631 | 191720  | 2 | LOC101901976 LOC101902024                                                                                                                                                                                                                             |
| 15 | 65782970 | 65865397 | 82428   | 2 | ABTB2 CAPRIN1 NAT10                                                                                                                                                                                                                                   |
| 15 | 65865397 | 66008423 | 143027  | 2 | ABTB2                                                                                                                                                                                                                                                 |
| 15 | 66008423 | 66275787 | 267365  | 2 | ABTB2 CAT ELF5 LOC104974297                                                                                                                                                                                                                           |
| 15 | 75442069 | 75957657 | 515589  | 2 | ALX4 CD82 EXT2 LOC100337430 LOC104974319                                                                                                                                                                                                              |
| 15 | 75957657 | 76216466 | 258810  | 2 | LOC107133185 TP53I11                                                                                                                                                                                                                                  |
| 16 | 66193221 | 66303668 | 110448  | 2 | NCF2 SMG7                                                                                                                                                                                                                                             |
| 16 | 79845738 | 79909739 | 64002   | 2 | LOC104974541 PTPRC                                                                                                                                                                                                                                    |
| 16 | 79909739 | 80542590 | 632852  | 2 | LOC104974542 LOC104974544 LOC104974545 LOC107133267 MIR181A-1 MIR181B-1                                                                                                                                                                               |
| 16 | 80542590 | 80685804 | 143215  | 2 | LOC101904123                                                                                                                                                                                                                                          |
| 16 | 80685804 | 80710541 | 24738   | 2 | .                                                                                                                                                                                                                                                     |
| 16 | 80710541 | 80810722 | 100182  | 3 | .                                                                                                                                                                                                                                                     |
| 16 | 80810722 | 81073948 | 263227  | 3 | NR5A2                                                                                                                                                                                                                                                 |
| 16 | 81073948 | 81195665 | 121718  | 3 | NR5A2                                                                                                                                                                                                                                                 |
| 16 | 81195665 | 81304555 | 108891  | 2 | ZNF281                                                                                                                                                                                                                                                |
| 17 | 4542981  | 4799440  | 256460  | 2 | ARFIP1 FHDC1 LOC104976512                                                                                                                                                                                                                             |
| 17 | 4799440  | 4820191  | 20752   | 2 | ARFIP1                                                                                                                                                                                                                                                |
| 17 | 4820191  | 4892814  | 72624   | 2 | ARFIP1 TIGD4                                                                                                                                                                                                                                          |
| 17 | 4892814  | 5012602  | 119789  | 2 | LOC104974562 LOC107133272 TIGD4 TMEM154                                                                                                                                                                                                               |
| 17 | 5012602  | 5091918  | 79317   | 3 | TMEM154                                                                                                                                                                                                                                               |

|    |          |          |         |   |                                                                                                                                                                                                                                                                                                                                                                                                                                                                                                                                                                                                                                                                                                                                                                                                                                                                                                                                                                                                                                                                                                                                                                                                                                                                                                                                                                                               |
|----|----------|----------|---------|---|-----------------------------------------------------------------------------------------------------------------------------------------------------------------------------------------------------------------------------------------------------------------------------------------------------------------------------------------------------------------------------------------------------------------------------------------------------------------------------------------------------------------------------------------------------------------------------------------------------------------------------------------------------------------------------------------------------------------------------------------------------------------------------------------------------------------------------------------------------------------------------------------------------------------------------------------------------------------------------------------------------------------------------------------------------------------------------------------------------------------------------------------------------------------------------------------------------------------------------------------------------------------------------------------------------------------------------------------------------------------------------------------------|
| 17 | 5091918  | 5127903  | 35986   | 3 | TRNAY-GUA                                                                                                                                                                                                                                                                                                                                                                                                                                                                                                                                                                                                                                                                                                                                                                                                                                                                                                                                                                                                                                                                                                                                                                                                                                                                                                                                                                                     |
| 17 | 5127903  | 5157927  | 30025   | 3 | FBXW7                                                                                                                                                                                                                                                                                                                                                                                                                                                                                                                                                                                                                                                                                                                                                                                                                                                                                                                                                                                                                                                                                                                                                                                                                                                                                                                                                                                         |
| 17 | 5157927  | 5276235  | 118309  | 3 | FBXW7                                                                                                                                                                                                                                                                                                                                                                                                                                                                                                                                                                                                                                                                                                                                                                                                                                                                                                                                                                                                                                                                                                                                                                                                                                                                                                                                                                                         |
| 17 | 5276235  | 5408319  | 132085  | 2 | FBXW7                                                                                                                                                                                                                                                                                                                                                                                                                                                                                                                                                                                                                                                                                                                                                                                                                                                                                                                                                                                                                                                                                                                                                                                                                                                                                                                                                                                         |
| 17 | 9202967  | 9357096  | 154130  | 4 | LOC104974568                                                                                                                                                                                                                                                                                                                                                                                                                                                                                                                                                                                                                                                                                                                                                                                                                                                                                                                                                                                                                                                                                                                                                                                                                                                                                                                                                                                  |
| 17 | 9357096  | 9423678  | 66583   | 4 | LOC104974568                                                                                                                                                                                                                                                                                                                                                                                                                                                                                                                                                                                                                                                                                                                                                                                                                                                                                                                                                                                                                                                                                                                                                                                                                                                                                                                                                                                  |
| 17 | 9423678  | 9512216  | 88539   | 4 | LOC104974568                                                                                                                                                                                                                                                                                                                                                                                                                                                                                                                                                                                                                                                                                                                                                                                                                                                                                                                                                                                                                                                                                                                                                                                                                                                                                                                                                                                  |
| 17 | 9512216  | 9525507  | 13292   | 4 | .                                                                                                                                                                                                                                                                                                                                                                                                                                                                                                                                                                                                                                                                                                                                                                                                                                                                                                                                                                                                                                                                                                                                                                                                                                                                                                                                                                                             |
| 17 | 9525507  | 9604580  | 79074   | 4 | .                                                                                                                                                                                                                                                                                                                                                                                                                                                                                                                                                                                                                                                                                                                                                                                                                                                                                                                                                                                                                                                                                                                                                                                                                                                                                                                                                                                             |
| 17 | 9604580  | 9622570  | 17991   | 2 | .                                                                                                                                                                                                                                                                                                                                                                                                                                                                                                                                                                                                                                                                                                                                                                                                                                                                                                                                                                                                                                                                                                                                                                                                                                                                                                                                                                                             |
| 17 | 71804664 | 71845465 | 40802   | 3 | LOC101906447 LOC619125 SEC14L4                                                                                                                                                                                                                                                                                                                                                                                                                                                                                                                                                                                                                                                                                                                                                                                                                                                                                                                                                                                                                                                                                                                                                                                                                                                                                                                                                                |
| 17 | 71845465 | 71879837 | 34373   | 3 | GAL3ST1 PES1 TRNAS-GGA                                                                                                                                                                                                                                                                                                                                                                                                                                                                                                                                                                                                                                                                                                                                                                                                                                                                                                                                                                                                                                                                                                                                                                                                                                                                                                                                                                        |
| 17 | 71879837 | 71994178 | 114342  | 4 | C17H5orf52 DUSP18 OSBP2 PES1 SLC35E4 TCN2                                                                                                                                                                                                                                                                                                                                                                                                                                                                                                                                                                                                                                                                                                                                                                                                                                                                                                                                                                                                                                                                                                                                                                                                                                                                                                                                                     |
| 17 | 71994178 | 72030759 | 36582   | 4 | OSBP2                                                                                                                                                                                                                                                                                                                                                                                                                                                                                                                                                                                                                                                                                                                                                                                                                                                                                                                                                                                                                                                                                                                                                                                                                                                                                                                                                                                         |
| 17 | 72030759 | 72154080 | 123322  | 4 | MORC2 OSBP2                                                                                                                                                                                                                                                                                                                                                                                                                                                                                                                                                                                                                                                                                                                                                                                                                                                                                                                                                                                                                                                                                                                                                                                                                                                                                                                                                                                   |
| 17 | 72154080 | 72248991 | 94912   | 4 | SMTN TUG1                                                                                                                                                                                                                                                                                                                                                                                                                                                                                                                                                                                                                                                                                                                                                                                                                                                                                                                                                                                                                                                                                                                                                                                                                                                                                                                                                                                     |
| 17 | 72248991 | 72469197 | 220207  | 4 | DRG1 INPP5J LIMK2 LOC101903756 PATZ1 PIK3IP1 PLA2G3 RNF185 SELM SMTN                                                                                                                                                                                                                                                                                                                                                                                                                                                                                                                                                                                                                                                                                                                                                                                                                                                                                                                                                                                                                                                                                                                                                                                                                                                                                                                          |
| 17 | 72469197 | 72710006 | 240810  | 4 | DEPDC5 DRG1 EIF4ENIF1 LOC104974705 PISD PRR14L SFI1                                                                                                                                                                                                                                                                                                                                                                                                                                                                                                                                                                                                                                                                                                                                                                                                                                                                                                                                                                                                                                                                                                                                                                                                                                                                                                                                           |
| 17 | 72716768 | 72813393 | 96626   | 4 | DEPDC5                                                                                                                                                                                                                                                                                                                                                                                                                                                                                                                                                                                                                                                                                                                                                                                                                                                                                                                                                                                                                                                                                                                                                                                                                                                                                                                                                                                        |
| 17 | 72813393 | 72888505 | 75113   | 4 | SLC5A1 YWHAH                                                                                                                                                                                                                                                                                                                                                                                                                                                                                                                                                                                                                                                                                                                                                                                                                                                                                                                                                                                                                                                                                                                                                                                                                                                                                                                                                                                  |
| 18 | 60943728 | 60973450 | 29723   | 4 | LOC101907390 LOC1049668479                                                                                                                                                                                                                                                                                                                                                                                                                                                                                                                                                                                                                                                                                                                                                                                                                                                                                                                                                                                                                                                                                                                                                                                                                                                                                                                                                                    |
| 18 | 60973450 | 61236243 | 262794  | 6 | LOC100336208 LOC100336431 LOC100336448 LOC100849068 LOC101902722<br>LOC101903016 LOC101906283 LOC101906367 LOC101907041 LOC101907390<br>LOC101909040 LOC104970711 LOC104976972 LOC107133353 LOC618456 LOC788268<br>LOC788405 LOC788928 ZNF679                                                                                                                                                                                                                                                                                                                                                                                                                                                                                                                                                                                                                                                                                                                                                                                                                                                                                                                                                                                                                                                                                                                                                 |
| 18 | 61236243 | 61351842 | 115600  | 6 | LOC100139104 LOC504861 ZNF331 ZNF679                                                                                                                                                                                                                                                                                                                                                                                                                                                                                                                                                                                                                                                                                                                                                                                                                                                                                                                                                                                                                                                                                                                                                                                                                                                                                                                                                          |
| 18 | 61351842 | 61369952 | 18111   | 6 | NLRP12                                                                                                                                                                                                                                                                                                                                                                                                                                                                                                                                                                                                                                                                                                                                                                                                                                                                                                                                                                                                                                                                                                                                                                                                                                                                                                                                                                                        |
| 18 | 61369952 | 61415205 | 45254   | 6 | LOC532048 NLRP12                                                                                                                                                                                                                                                                                                                                                                                                                                                                                                                                                                                                                                                                                                                                                                                                                                                                                                                                                                                                                                                                                                                                                                                                                                                                                                                                                                              |
| 18 | 61415205 | 61507521 | 92317   | 6 | LOC107131459 LOC789229 MGC139164 MIR371 NLRP12                                                                                                                                                                                                                                                                                                                                                                                                                                                                                                                                                                                                                                                                                                                                                                                                                                                                                                                                                                                                                                                                                                                                                                                                                                                                                                                                                |
| 18 | 61507521 | 61538180 | 30660   | 6 | LOC504704 LOC506868                                                                                                                                                                                                                                                                                                                                                                                                                                                                                                                                                                                                                                                                                                                                                                                                                                                                                                                                                                                                                                                                                                                                                                                                                                                                                                                                                                           |
| 18 | 61538180 | 61583660 | 45481   | 6 | LOC515600 LOC615600 MGC157082                                                                                                                                                                                                                                                                                                                                                                                                                                                                                                                                                                                                                                                                                                                                                                                                                                                                                                                                                                                                                                                                                                                                                                                                                                                                                                                                                                 |
| 18 | 61583660 | 61601509 | 17850   | 7 | LOC784517 MGC157082                                                                                                                                                                                                                                                                                                                                                                                                                                                                                                                                                                                                                                                                                                                                                                                                                                                                                                                                                                                                                                                                                                                                                                                                                                                                                                                                                                           |
| 18 | 61601509 | 61764023 | 162515  | 7 | LOC101904080 LOC101904151 LOC511982 LOC513941 LOC527385 LOC784517<br>LOC785919 MGC157082                                                                                                                                                                                                                                                                                                                                                                                                                                                                                                                                                                                                                                                                                                                                                                                                                                                                                                                                                                                                                                                                                                                                                                                                                                                                                                      |
| 18 | 61764023 | 61842496 | 78474   | 7 | LOC517090 LOC528568 LOC618873                                                                                                                                                                                                                                                                                                                                                                                                                                                                                                                                                                                                                                                                                                                                                                                                                                                                                                                                                                                                                                                                                                                                                                                                                                                                                                                                                                 |
| 18 | 61842496 | 61960159 | 117664  | 7 | LOC107131285 LOC510904 LOC528332 LOC617141 MGC138914                                                                                                                                                                                                                                                                                                                                                                                                                                                                                                                                                                                                                                                                                                                                                                                                                                                                                                                                                                                                                                                                                                                                                                                                                                                                                                                                          |
| 18 | 61960159 | 62170418 | 210260  | 7 | LOC100300449 LOC100300531 LOC100336759 LOC100337097 LOC101907900<br>LOC510904 LOC514552 LOC518964 LOC525820<br>CACNG7 LOC100848932 LOC101904722 LOC101904797 LOC101904855<br>LOC104974943 LOC538810 LOC618662 LOC788745 LOC789418 MYADM PRKCG                                                                                                                                                                                                                                                                                                                                                                                                                                                                                                                                                                                                                                                                                                                                                                                                                                                                                                                                                                                                                                                                                                                                                 |
| 20 | 32104262 | 32460457 | 356196  | 2 | GHR LOC104975266 LOC104975269                                                                                                                                                                                                                                                                                                                                                                                                                                                                                                                                                                                                                                                                                                                                                                                                                                                                                                                                                                                                                                                                                                                                                                                                                                                                                                                                                                 |
| 20 | 32460457 | 32663938 | 203482  | 2 | .                                                                                                                                                                                                                                                                                                                                                                                                                                                                                                                                                                                                                                                                                                                                                                                                                                                                                                                                                                                                                                                                                                                                                                                                                                                                                                                                                                                             |
| 20 | 32663938 | 32839701 | 175764  | 2 | FBXO4 OXCT1                                                                                                                                                                                                                                                                                                                                                                                                                                                                                                                                                                                                                                                                                                                                                                                                                                                                                                                                                                                                                                                                                                                                                                                                                                                                                                                                                                                   |
| 20 | 32839701 | 33238463 | 398763  | 2 | OXCT1 PLCXD3 TRNAY-GUA                                                                                                                                                                                                                                                                                                                                                                                                                                                                                                                                                                                                                                                                                                                                                                                                                                                                                                                                                                                                                                                                                                                                                                                                                                                                                                                                                                        |
| 22 | 27695490 | 27787199 | 91710   | 2 | .                                                                                                                                                                                                                                                                                                                                                                                                                                                                                                                                                                                                                                                                                                                                                                                                                                                                                                                                                                                                                                                                                                                                                                                                                                                                                                                                                                                             |
| 22 | 27787199 | 28243694 | 456496  | 3 | .                                                                                                                                                                                                                                                                                                                                                                                                                                                                                                                                                                                                                                                                                                                                                                                                                                                                                                                                                                                                                                                                                                                                                                                                                                                                                                                                                                                             |
| 22 | 28243694 | 28480244 | 236551  | 2 | LOC104975536 PDZRN3                                                                                                                                                                                                                                                                                                                                                                                                                                                                                                                                                                                                                                                                                                                                                                                                                                                                                                                                                                                                                                                                                                                                                                                                                                                                                                                                                                           |
| 22 | 28480244 | 28781676 | 301433  | 2 | PDZRN3                                                                                                                                                                                                                                                                                                                                                                                                                                                                                                                                                                                                                                                                                                                                                                                                                                                                                                                                                                                                                                                                                                                                                                                                                                                                                                                                                                                        |
| 23 | 25397164 | 25854966 | 457803  | 3 | BOLA-DQA1 BOLA-DQA2 BOLA-DQA5 BOLA-DQB BOLA-DRA BOLA-DRB2 BOLA-DRB3<br>BTNL2 LOC100848815 LOC100851058 LOC101902890 LOC101903077 LOC504295<br>LOC525599 LOC786695<br>BLA-DQB BTNL2 LOC101903077 LOC101903155 LOC101903211 LOC101908667<br>LOC104969893 LOC104975658 LOC783151                                                                                                                                                                                                                                                                                                                                                                                                                                                                                                                                                                                                                                                                                                                                                                                                                                                                                                                                                                                                                                                                                                                 |
| 23 | 25854966 | 26184884 | 329919  | 2 |                                                                                                                                                                                                                                                                                                                                                                                                                                                                                                                                                                                                                                                                                                                                                                                                                                                                                                                                                                                                                                                                                                                                                                                                                                                                                                                                                                                               |
| 23 | 27825007 | 29802406 | 1977400 | 2 | ABCF1 ATAT1 BOLA BOLA-NC1 C23H6orf136 C23H6orf136 CCHCR1 CDSN DDR1<br>DHX16 DPCR1 FLOT1 GABBR1 GNL1 GTF2H4 IER3 JSP.1 LOC100141101<br>LOC100295296 LOC100300439 LOC100847761 LOC101904511 LOC101905956<br>LOC101906024 LOC101906691 LOC101907137 LOC104975665 LOC104975666<br>LOC104975667 LOC104975670 LOC107131305 LOC107131733 LOC107131734<br>LOC107131735 LOC107131736 LOC107131737 LOC107131738 LOC107133389<br>LOC107133391 LOC504548 LOC506486 LOC509155 LOC509280 LOC510530<br>LOC511103 LOC512579 LOC512672 LOC514434 LOC515704 LOC516273 LOC516274<br>LOC523389 LOC523768 LOC523769 LOC526288 LOC528343 LOC614091 LOC615278<br>LOC616306 LOC616517 LOC616942 LOC618034 LOC618052 LOC618064 LOC618070<br>LOC618140 LOC619014 LOC782262 LOC782301 LOC782341 LOC782379 LOC784557<br>LOC784614 LOC784652 LOC784681 LOC784787 LOC784858 LOC785162 LOC785252<br>LOC785277 LOC785431 LOC785479 LOC785582 LOC785639 LOC785672 LOC785712<br>LOC785747 LOC785760 LOC785779 LOC785811 LOC785832 LOC785858 LOC785873<br>LOC785884 LOC785910 LOC786846 LOC786987 LOC787188 LOC788663 LOC788675<br>LOC789358 LOC789367 LOC789690 MDC1 MIR2378 MIR877 MOG MRPS18B MUC21<br>NRM OR10C1 OR12D2 OR12D3 OR14J1 OR2H1 OR2J2 OR2J3 OR2W1 OR5V1<br>POU5F1 PPP1R10 PPP1R11 PPP1R18 PRR3 PSORS1C2 RNF39 RPP21 SFTA2 TCF19<br>TRIM10 TRIM15 TRIM31 TRIM40 TRNAG-CCC TRNAS-CGA TUBB UBD VARS2 ZFP57<br>ZNRD1 |
| 23 | 29802406 | 30512304 | 709899  | 2 | LOC100847345 LOC101909685 LOC104970719 LOC104975673 LOC107131411<br>LOC107131741 LOC528914 LOC529518 LOC532291 LOC617979 LOC782475<br>LOC782554 LOC784131 NKAPL PGBD1 TRIM27 TRNAA-AGC TRNAA-CGC TRNAA-<br>UGC TRNAE-CUC TRNAF-GAA TRNAK-UUU TRNAL-AAG TRNAL-CAA TRNAM-CAU<br>TRNAQ-CUG TRNAQ-UUG TRNAR-CCG TRNAS-GCU TRNAT-AGU TRNAT-CGU<br>ZKSCAN4 ZKSCAN8 ZNF165 ZNF311 ZNF389 ZSCAN12 ZSCAN16 ZSCAN26 ZSCAN31<br>ZSCAN9                                                                                                                                                                                                                                                                                                                                                                                                                                                                                                                                                                                                                                                                                                                                                                                                                                                                                                                                                                   |

|    |          |          |         |   |                                                                                                                                                                                                                                                                                                                                                 |
|----|----------|----------|---------|---|-------------------------------------------------------------------------------------------------------------------------------------------------------------------------------------------------------------------------------------------------------------------------------------------------------------------------------------------------|
| 24 | 6698234  | 7285114  | 586881  | 2 | LOC101907394 LOC104975731                                                                                                                                                                                                                                                                                                                       |
| 24 | 7285114  | 7292705  | 7592    | 2 | .                                                                                                                                                                                                                                                                                                                                               |
| 24 | 47215620 | 47607020 | 391401  | 2 | HDHD2 IER3IP1 KATNAL2 LOC100847542 LOC104975783 LOC783504 LOC785129<br>PIAS2 SKOR2                                                                                                                                                                                                                                                              |
| 24 | 47607020 | 48007916 | 400897  | 2 | .                                                                                                                                                                                                                                                                                                                                               |
| 24 | 48007916 | 49525735 | 1517820 | 2 | CTIF DYM LOC101904605 LOC104969950 LOC107131402 LOC107133399 LOC786409<br>SMAD2 SMAD7 ZBTB7C                                                                                                                                                                                                                                                    |
| 24 | 49525735 | 49901454 | 375720  | 2 | C24H18orf32 DYM LOC107131298 LOC509808 MIR2381 RPL17                                                                                                                                                                                                                                                                                            |
| 24 | 49901454 | 49926879 | 25426   | 2 | .                                                                                                                                                                                                                                                                                                                                               |
| 24 | 49926879 | 50068182 | 141304  | 2 | .                                                                                                                                                                                                                                                                                                                                               |
| 24 | 50068182 | 55599646 | 5531465 | 2 | LOC107131789<br>ACAA2 C24H18orf54 CCDC68 CFAP53 CXXC1 DCC ELAC1 LOC100137989<br>LOC101904580 LOC104972848 LOC104975792 LOC104975794 LOC104975818<br>LOC107131794 LOC107131795 LOC789119 MAPK4 MBD1 MBD2 ME2 MEX3C MRO<br>MYO5B POLI RAB27B SKA1 SMAD4 STARD6 TCF4 TRNAC-GCA<br>LOC101906559 LOC101906657 LOC104975797 LOC104975798 LOC104975799 |
| 24 | 55599646 | 57079493 | 1479848 | 2 | LOC107131796 TXNL1 WDR7                                                                                                                                                                                                                                                                                                                         |
| 24 | 57079493 | 57938545 | 859053  | 2 | ATP8B1 FECH LOC107131797 NARS NEDD4L ONECUT2 ST8SIA3 TRNAE-CUC                                                                                                                                                                                                                                                                                  |
| 24 | 60032599 | 61613864 | 1581266 | 2 | CDH20 KIAA1468 LOC101902622 LOC101903157 LOC104975811 LOC107131802<br>LOC783926 PIGN RNF152 TNFRSF11A TRNAC-GCA ZCCHC2<br>LOC100337223 LOC107131200 LOC107131803 LOC519132 LOC786348 LOC786410                                                                                                                                                  |
| 24 | 62574040 | 62641660 | 67621   | 2 | .                                                                                                                                                                                                                                                                                                                                               |
| 25 | 8189597  | 8190031  | 435     | 2 | .                                                                                                                                                                                                                                                                                                                                               |
| 27 | 15857929 | 15860219 | 2291    | 2 | .                                                                                                                                                                                                                                                                                                                                               |
| 27 | 15936317 | 15936511 | 195     | 2 | .                                                                                                                                                                                                                                                                                                                                               |
| 27 | 15975850 | 15979401 | 3552    | 2 | .                                                                                                                                                                                                                                                                                                                                               |
| 27 | 16017303 | 16017952 | 650     | 2 | .                                                                                                                                                                                                                                                                                                                                               |
| 27 | 16187774 | 16188159 | 386     | 2 | LOC107131908                                                                                                                                                                                                                                                                                                                                    |
| 27 | 16288455 | 16289066 | 612     | 2 | LOC101905556                                                                                                                                                                                                                                                                                                                                    |
| 27 | 16289066 | 16289846 | 781     | 2 | LOC101905556                                                                                                                                                                                                                                                                                                                                    |
| 27 | 16289846 | 16290290 | 445     | 2 | LOC101905556                                                                                                                                                                                                                                                                                                                                    |
| 27 | 16487704 | 16497432 | 9729    | 2 | .                                                                                                                                                                                                                                                                                                                                               |
| 27 | 16497432 | 16505579 | 8148    | 2 | .                                                                                                                                                                                                                                                                                                                                               |
| 27 | 16505579 | 16507368 | 1790    | 2 | .                                                                                                                                                                                                                                                                                                                                               |
| 27 | 16507368 | 16513357 | 5990    | 2 | .                                                                                                                                                                                                                                                                                                                                               |
| 27 | 16739322 | 16739775 | 454     | 2 | ZFP42                                                                                                                                                                                                                                                                                                                                           |
| 27 | 16739775 | 16744892 | 5118    | 2 | .                                                                                                                                                                                                                                                                                                                                               |
| 27 | 16744892 | 16753615 | 8724    | 2 | TRNAG-UCC                                                                                                                                                                                                                                                                                                                                       |
| 27 | 16753615 | 16755172 | 1558    | 2 | .                                                                                                                                                                                                                                                                                                                                               |
| 27 | 16781395 | 16781599 | 205     | 2 | .                                                                                                                                                                                                                                                                                                                                               |
| 27 | 16831698 | 16832220 | 523     | 2 | .                                                                                                                                                                                                                                                                                                                                               |
| 27 | 16832220 | 16832828 | 609     | 2 | .                                                                                                                                                                                                                                                                                                                                               |
| 27 | 16854438 | 16854695 | 258     | 2 | .                                                                                                                                                                                                                                                                                                                                               |
| 27 | 17486656 | 17499388 | 12733   | 2 | .                                                                                                                                                                                                                                                                                                                                               |
| 27 | 17499388 | 17510848 | 11461   | 2 | .                                                                                                                                                                                                                                                                                                                                               |
| 27 | 17511069 | 17511839 | 771     | 2 | .                                                                                                                                                                                                                                                                                                                                               |
| 27 | 17511839 | 17528052 | 16214   | 2 | .                                                                                                                                                                                                                                                                                                                                               |
| 27 | 17528052 | 17529460 | 1409    | 3 | .                                                                                                                                                                                                                                                                                                                                               |
| 27 | 17529460 | 17543551 | 14092   | 2 | .                                                                                                                                                                                                                                                                                                                                               |
| 27 | 17543551 | 17543921 | 371     | 2 | .                                                                                                                                                                                                                                                                                                                                               |
| 27 | 17543921 | 17545038 | 1118    | 2 | .                                                                                                                                                                                                                                                                                                                                               |
| 27 | 19247072 | 19250159 | 3088    | 3 | ZDHHC2                                                                                                                                                                                                                                                                                                                                          |
| 27 | 19250159 | 19265034 | 14876   | 3 | ZDHHC2                                                                                                                                                                                                                                                                                                                                          |
| 27 | 19265034 | 19276157 | 11124   | 3 | ZDHHC2                                                                                                                                                                                                                                                                                                                                          |
| 27 | 19276157 | 19282867 | 6711    | 2 | .                                                                                                                                                                                                                                                                                                                                               |
| 27 | 19282867 | 19292339 | 9473    | 3 | .                                                                                                                                                                                                                                                                                                                                               |
| 27 | 19292339 | 19294203 | 1865    | 4 | .                                                                                                                                                                                                                                                                                                                                               |
| 27 | 19294203 | 19298215 | 4013    | 3 | MICU3                                                                                                                                                                                                                                                                                                                                           |
| 27 | 19298215 | 19309522 | 11308   | 3 | MICU3                                                                                                                                                                                                                                                                                                                                           |
| 27 | 19309522 | 19312361 | 2840    | 3 | MICU3                                                                                                                                                                                                                                                                                                                                           |
| 27 | 19312361 | 19314441 | 2081    | 3 | MICU3                                                                                                                                                                                                                                                                                                                                           |
| 27 | 19314441 | 19317131 | 2691    | 3 | MICU3                                                                                                                                                                                                                                                                                                                                           |
| 27 | 19317131 | 19317896 | 766     | 3 | MICU3                                                                                                                                                                                                                                                                                                                                           |
| 27 | 19317896 | 19331537 | 13642   | 3 | MICU3                                                                                                                                                                                                                                                                                                                                           |
| 27 | 19331537 | 19346031 | 14495   | 4 | MICU3                                                                                                                                                                                                                                                                                                                                           |
| 27 | 19346031 | 19349512 | 3482    | 3 | MICU3                                                                                                                                                                                                                                                                                                                                           |
| 27 | 19349512 | 19349875 | 364     | 3 | MICU3                                                                                                                                                                                                                                                                                                                                           |
| 27 | 19349875 | 19350814 | 940     | 3 | MICU3                                                                                                                                                                                                                                                                                                                                           |
| 27 | 19350814 | 19366289 | 15476   | 3 | MICU3                                                                                                                                                                                                                                                                                                                                           |
| 27 | 19366289 | 19370385 | 4097    | 3 | MICU3                                                                                                                                                                                                                                                                                                                                           |
| 27 | 19370385 | 19374221 | 3837    | 3 | .                                                                                                                                                                                                                                                                                                                                               |
| 27 | 19374221 | 19382214 | 7994    | 3 | .                                                                                                                                                                                                                                                                                                                                               |
| 27 | 19382214 | 19407739 | 25526   | 3 | FGF20                                                                                                                                                                                                                                                                                                                                           |
| 27 | 19407739 | 19426163 | 18425   | 3 | FGF20                                                                                                                                                                                                                                                                                                                                           |
| 27 | 19426163 | 19429020 | 2858    | 3 | .                                                                                                                                                                                                                                                                                                                                               |
| 27 | 19429020 | 19431732 | 2713    | 3 | .                                                                                                                                                                                                                                                                                                                                               |
| 27 | 19431732 | 19436240 | 4509    | 3 | .                                                                                                                                                                                                                                                                                                                                               |
| 27 | 19436240 | 19437619 | 1380    | 3 | .                                                                                                                                                                                                                                                                                                                                               |
| 27 | 19437619 | 19438902 | 1284    | 4 | .                                                                                                                                                                                                                                                                                                                                               |
| 27 | 19438902 | 19440182 | 1281    | 3 | .                                                                                                                                                                                                                                                                                                                                               |
| 27 | 19440182 | 19443250 | 3069    | 3 | .                                                                                                                                                                                                                                                                                                                                               |
| 27 | 19443250 | 19443487 | 238     | 3 | .                                                                                                                                                                                                                                                                                                                                               |
| 27 | 19443487 | 19448290 | 4804    | 3 | .                                                                                                                                                                                                                                                                                                                                               |
| 27 | 19448290 | 19450042 | 1753    | 4 | .                                                                                                                                                                                                                                                                                                                                               |
| 27 | 19450042 | 19465709 | 15668   | 3 | .                                                                                                                                                                                                                                                                                                                                               |
| 27 | 19465709 | 19469083 | 3375    | 3 | .                                                                                                                                                                                                                                                                                                                                               |
| 27 | 19469083 | 19469823 | 741     | 3 | .                                                                                                                                                                                                                                                                                                                                               |
| 27 | 19469823 | 19485723 | 15901   | 3 | .                                                                                                                                                                                                                                                                                                                                               |
| 27 | 19485723 | 19485970 | 248     | 4 | .                                                                                                                                                                                                                                                                                                                                               |
| 27 | 19485970 | 19492376 | 6407    | 3 | .                                                                                                                                                                                                                                                                                                                                               |
| 27 | 19492376 | 19495709 | 3334    | 3 | .                                                                                                                                                                                                                                                                                                                                               |
| 27 | 19495709 | 19498754 | 3046    | 3 | .                                                                                                                                                                                                                                                                                                                                               |

|    |          |          |       |   |   |
|----|----------|----------|-------|---|---|
| 27 | 19498754 | 19501106 | 2353  | 3 | . |
| 27 | 19501106 | 19511302 | 10197 | 3 | . |
| 27 | 19511302 | 19515767 | 4466  | 3 | . |
| 27 | 19515767 | 19522723 | 6957  | 3 | . |
| 27 | 19522723 | 19532708 | 9986  | 3 | . |
| 27 | 19532708 | 19540146 | 7439  | 4 | . |
| 27 | 19540146 | 19545383 | 5238  | 4 | . |
| 27 | 19545383 | 19548037 | 2655  | 2 | . |
| 27 | 19548037 | 19554939 | 6903  | 3 | . |
| 27 | 19554939 | 19563556 | 8618  | 4 | . |
| 27 | 19563556 | 19571607 | 8052  | 3 | . |
| 27 | 19571607 | 19581225 | 9619  | 3 | . |
| 27 | 19581225 | 19583013 | 1789  | 4 | . |
| 27 | 19583013 | 19583110 | 98    | 3 | . |
| 27 | 19583110 | 19589274 | 6165  | 3 | . |
| 27 | 19589274 | 19593031 | 3758  | 3 | . |
| 27 | 19593031 | 19593903 | 873   | 4 | . |
| 27 | 19593903 | 19595039 | 1137  | 3 | . |
| 27 | 19595039 | 19596380 | 1342  | 2 | . |
| 27 | 19596380 | 19596858 | 479   | 2 | . |
| 27 | 19596858 | 19597175 | 318   | 3 | . |
| 27 | 19597175 | 19600251 | 3077  | 3 | . |
| 27 | 19600251 | 19603191 | 2941  | 3 | . |
| 27 | 19603191 | 19604513 | 1323  | 2 | . |
| 27 | 19604513 | 19605560 | 1048  | 2 | . |
| 27 | 19605560 | 19607438 | 1879  | 3 | . |
| 27 | 19607438 | 19620419 | 12982 | 3 | . |
| 27 | 19620419 | 19623017 | 2599  | 2 | . |
| 27 | 19623017 | 19625843 | 2827  | 3 | . |
| 27 | 19625843 | 19627870 | 2028  | 3 | . |
| 27 | 19627870 | 19629236 | 1367  | 3 | . |
| 27 | 19629236 | 19641925 | 12690 | 3 | . |
| 27 | 19641925 | 19642190 | 266   | 3 | . |
| 27 | 19642190 | 19642900 | 711   | 3 | . |
| 27 | 19642900 | 19652044 | 9145  | 3 | . |
| 27 | 19652044 | 19653033 | 990   | 3 | . |
| 27 | 19653033 | 19656046 | 3014  | 3 | . |
| 27 | 19656046 | 19666279 | 10234 | 2 | . |
| 27 | 19671327 | 19672124 | 798   | 2 | . |
| 27 | 19672124 | 19675950 | 3827  | 3 | . |
| 27 | 19675950 | 19682238 | 6289  | 4 | . |
| 27 | 19682238 | 19682600 | 363   | 4 | . |
| 27 | 19682600 | 19685471 | 2872  | 4 | . |
| 27 | 19685471 | 19687677 | 2207  | 4 | . |
| 27 | 19687677 | 19690080 | 2404  | 3 | . |
| 27 | 19690080 | 19692250 | 2171  | 3 | . |
| 27 | 19692250 | 19695070 | 2821  | 3 | . |
| 27 | 19695070 | 19697202 | 2133  | 3 | . |
| 27 | 19697202 | 19702059 | 4858  | 3 | . |
| 27 | 19702059 | 19702912 | 854   | 4 | . |
| 27 | 19702912 | 19717340 | 14429 | 3 | . |
| 27 | 19717340 | 19720663 | 3324  | 3 | . |
| 27 | 19720663 | 19721712 | 1050  | 3 | . |
| 27 | 19721712 | 19726110 | 4399  | 3 | . |
| 27 | 19726110 | 19727064 | 955   | 3 | . |
| 27 | 19727064 | 19727460 | 397   | 3 | . |
| 27 | 19727460 | 19740024 | 12565 | 4 | . |
| 27 | 19740024 | 19744447 | 4424  | 4 | . |
| 27 | 19744447 | 19751180 | 6734  | 3 | . |
| 27 | 19751180 | 19752027 | 848   | 3 | . |
| 27 | 19752027 | 19754320 | 2294  | 3 | . |
| 27 | 19754320 | 19758312 | 3993  | 3 | . |
| 27 | 19758312 | 19759796 | 1485  | 3 | . |
| 27 | 19759796 | 19760800 | 1005  | 3 | . |
| 27 | 19760800 | 19761887 | 1088  | 3 | . |
| 27 | 19761887 | 19763311 | 1425  | 3 | . |
| 27 | 19763311 | 19767434 | 4124  | 3 | . |
| 27 | 19767434 | 19770351 | 2918  | 3 | . |
| 27 | 19770351 | 19777287 | 6937  | 3 | . |
| 27 | 19777287 | 19778149 | 863   | 3 | . |
| 27 | 19778149 | 19778451 | 303   | 3 | . |
| 27 | 19778451 | 19785623 | 7173  | 2 | . |
| 27 | 19785623 | 19794354 | 8732  | 2 | . |
| 27 | 19794354 | 19794684 | 331   | 2 | . |
| 27 | 19794684 | 19795310 | 627   | 2 | . |
| 27 | 19795310 | 19796467 | 1158  | 2 | . |
| 27 | 19796467 | 19798537 | 2071  | 2 | . |
| 27 | 19798724 | 19802894 | 4171  | 2 | . |
| 27 | 19802894 | 19803108 | 215   | 2 | . |
| 27 | 19803108 | 19803866 | 759   | 2 | . |
| 27 | 19803866 | 19804394 | 529   | 2 | . |
| 27 | 19804394 | 19805080 | 687   | 2 | . |
| 27 | 19805080 | 19805923 | 844   | 2 | . |
| 27 | 19805923 | 19811664 | 5742  | 2 | . |
| 27 | 19811664 | 19815404 | 3741  | 2 | . |
| 27 | 19815404 | 19815820 | 417   | 2 | . |
| 27 | 19815820 | 19816389 | 570   | 3 | . |
| 27 | 19816389 | 19817045 | 657   | 2 | . |
| 27 | 19817045 | 19824305 | 7261  | 2 | . |
| 27 | 19824305 | 19825088 | 784   | 2 | . |
| 27 | 19825088 | 19842445 | 17358 | 3 | . |

|    |          |          |       |   |                |
|----|----------|----------|-------|---|----------------|
| 27 | 19842445 | 19842880 | 436   | 3 | .              |
| 27 | 19842880 | 19845295 | 2416  | 3 | LOC104976064   |
| 27 | 19845295 | 19846870 | 1576  | 2 | LOC104976064   |
| 27 | 25295114 | 25295481 | 368   | 2 | .              |
| 27 | 25295481 | 25297362 | 1882  | 5 | .              |
| 27 | 25297362 | 25319494 | 22133 | 5 | .              |
| 27 | 25319494 | 25319863 | 370   | 5 | .              |
| 27 | 25319863 | 25321573 | 1711  | 4 | .              |
| 27 | 25321573 | 25324375 | 2803  | 5 | .              |
| 27 | 25324375 | 25326920 | 2546  | 5 | .              |
| 27 | 25326920 | 25327064 | 145   | 4 | .              |
| 27 | 25327064 | 25331706 | 4643  | 5 | .              |
| 27 | 25331706 | 25337592 | 5887  | 5 | .              |
| 27 | 25337592 | 25338580 | 989   | 5 | .              |
| 27 | 25338580 | 25338978 | 399   | 5 | .              |
| 27 | 25338978 | 25339727 | 750   | 5 | .              |
| 27 | 25339727 | 25351574 | 11848 | 5 | .              |
| 27 | 25351574 | 25379257 | 27684 | 5 | .              |
| 27 | 25379257 | 25380607 | 1351  | 5 | .              |
| 27 | 25380607 | 25380885 | 279   | 5 | .              |
| 27 | 25380885 | 25385023 | 4139  | 5 | .              |
| 27 | 25385023 | 25385805 | 783   | 6 | .              |
| 27 | 25385805 | 25388277 | 2473  | 6 | .              |
| 27 | 25388277 | 25391139 | 2863  | 6 | .              |
| 27 | 25391139 | 25393988 | 2850  | 6 | .              |
| 27 | 25393988 | 25399911 | 5924  | 6 | .              |
| 27 | 25399911 | 25401686 | 1776  | 6 | .              |
| 27 | 25401686 | 25405659 | 3974  | 5 | .              |
| 27 | 25405659 | 25407112 | 1454  | 5 | .              |
| 27 | 25407112 | 25408474 | 1363  | 5 | .              |
| 27 | 25408474 | 25409196 | 723   | 5 | .              |
| 27 | 25409196 | 25410735 | 1540  | 6 | .              |
| 27 | 25410735 | 25420742 | 10008 | 5 | .              |
| 27 | 25420742 | 25423748 | 3007  | 5 | .              |
| 27 | 25423748 | 25425313 | 1566  | 6 | .              |
| 27 | 25425313 | 25427534 | 2222  | 5 | .              |
| 27 | 25427534 | 25427862 | 329   | 5 | .              |
| 27 | 25427862 | 25436168 | 8307  | 5 | .              |
| 27 | 25436168 | 25444931 | 8764  | 5 | .              |
| 27 | 25444931 | 25453651 | 8721  | 5 | .              |
| 27 | 25453651 | 25455330 | 1680  | 5 | .              |
| 27 | 25455330 | 25455877 | 548   | 6 | .              |
| 27 | 25455877 | 25463194 | 7318  | 5 | .              |
| 27 | 25463194 | 25466008 | 2815  | 5 | .              |
| 27 | 25466008 | 25466608 | 601   | 5 | .              |
| 27 | 25466608 | 25467220 | 613   | 5 | .              |
| 27 | 25467220 | 25467531 | 312   | 4 | .              |
| 27 | 25467531 | 25469854 | 2324  | 4 | .              |
| 27 | 25469854 | 25470571 | 718   | 4 | .              |
| 27 | 25470571 | 25472791 | 2221  | 4 | .              |
| 27 | 25472791 | 25481916 | 9126  | 5 | .              |
| 27 | 25481916 | 25484006 | 2091  | 5 | .              |
| 27 | 25484006 | 25486578 | 2573  | 5 | .              |
| 27 | 25486578 | 25490630 | 4053  | 4 | .              |
| 27 | 25490630 | 25490803 | 174   | 4 | .              |
| 27 | 25490803 | 25492348 | 1546  | 4 | .              |
| 27 | 25492348 | 25495480 | 3133  | 4 | .              |
| 27 | 25495480 | 25495922 | 443   | 5 | .              |
| 27 | 25495922 | 25496067 | 146   | 6 | .              |
| 27 | 25496067 | 25503354 | 7288  | 5 | .              |
| 27 | 25503354 | 25503676 | 323   | 5 | .              |
| 27 | 25503676 | 25506161 | 2486  | 5 | .              |
| 27 | 25506161 | 25510257 | 4097  | 5 | .              |
| 27 | 25510257 | 25510861 | 605   | 6 | .              |
| 27 | 25510861 | 25511184 | 324   | 7 | .              |
| 27 | 25511184 | 25512887 | 1704  | 7 | .              |
| 27 | 25512887 | 25513989 | 1103  | 5 | .              |
| 27 | 25513989 | 25517232 | 3244  | 5 | .              |
| 27 | 25517232 | 25517451 | 220   | 5 | .              |
| 27 | 25517451 | 25519075 | 1625  | 5 | .              |
| 27 | 25519075 | 25524431 | 5357  | 5 | .              |
| 27 | 25524431 | 25524721 | 291   | 5 | .              |
| 27 | 25524721 | 25526214 | 1494  | 5 | .              |
| 27 | 25526214 | 25528142 | 1929  | 5 | .              |
| 27 | 25528142 | 25543983 | 15842 | 5 | SARAF          |
| 27 | 25543983 | 25544869 | 887   | 5 | SARAF          |
| 27 | 25544869 | 25551205 | 6337  | 6 | SARAF          |
| 27 | 25551205 | 25552776 | 1572  | 5 | SARAF          |
| 27 | 25552776 | 25553675 | 900   | 7 | SARAF          |
| 27 | 25553675 | 25554241 | 567   | 7 | SARAF          |
| 27 | 25554241 | 25555059 | 819   | 5 | SARAF          |
| 27 | 25555059 | 25555680 | 622   | 5 | SARAF          |
| 27 | 25555680 | 25560016 | 4337  | 5 | SARAF          |
| 27 | 25560016 | 25567970 | 7955  | 5 | LEPROTL1 SARAF |
| 27 | 25567970 | 25568454 | 485   | 5 | LEPROTL1       |
| 27 | 25568454 | 25568890 | 437   | 5 | LEPROTL1       |
| 27 | 25568890 | 25569391 | 502   | 6 | LEPROTL1       |
| 27 | 25569391 | 25569977 | 587   | 6 | LEPROTL1       |
| 27 | 25569977 | 25573784 | 3808  | 6 | LEPROTL1       |
| 27 | 25573784 | 25579330 | 5547  | 6 | LEPROTL1       |
| 27 | 25579330 | 25580413 | 1084  | 5 | .              |



|    |          |          |       |   |              |
|----|----------|----------|-------|---|--------------|
| 27 | 25580413 | 25595646 | 15234 | 5 | MBOAT4       |
| 27 | 25595646 | 25596218 | 573   | 5 | MBOAT4       |
| 27 | 25596218 | 25599023 | 2806  | 5 | MBOAT4       |
| 27 | 25599023 | 25600505 | 1483  | 4 | MBOAT4       |
| 27 | 25600505 | 25603219 | 2715  | 5 | MBOAT4       |
| 27 | 25603219 | 25604029 | 811   | 5 | .            |
| 27 | 25604029 | 25605056 | 1028  | 5 | .            |
| 27 | 25605056 | 25605399 | 344   | 5 | .            |
| 27 | 25605399 | 25606770 | 1372  | 4 | .            |
| 27 | 25606770 | 25612082 | 5313  | 5 | DCTN6        |
| 27 | 25612082 | 25612533 | 452   | 5 | DCTN6        |
| 27 | 25612533 | 25613815 | 1283  | 5 | DCTN6        |
| 27 | 25613815 | 25614037 | 223   | 6 | DCTN6        |
| 27 | 25614037 | 25614229 | 193   | 5 | DCTN6        |
| 27 | 25614229 | 25614653 | 425   | 5 | DCTN6        |
| 27 | 25614653 | 25619499 | 4847  | 5 | DCTN6        |
| 27 | 25619499 | 25619872 | 374   | 6 | DCTN6        |
| 27 | 25619872 | 25622814 | 2943  | 5 | DCTN6        |
| 27 | 25622814 | 25623366 | 553   | 4 | DCTN6        |
| 27 | 25623366 | 25638724 | 15359 | 5 | DCTN6        |
| 27 | 25638724 | 25638994 | 271   | 4 | .            |
| 27 | 25638994 | 25639177 | 184   | 5 | .            |
| 27 | 25639177 | 25641080 | 1904  | 5 | LOC104976086 |
| 27 | 25641080 | 25642192 | 1113  | 5 | LOC104976086 |
| 27 | 25642192 | 25642988 | 797   | 5 | LOC104976086 |
| 27 | 25642988 | 25649083 | 6096  | 5 | LOC104976086 |
| 27 | 25649083 | 25649657 | 575   | 5 | .            |
| 27 | 25649657 | 25651968 | 2312  | 5 | .            |
| 27 | 25651968 | 25653071 | 1104  | 5 | .            |
| 27 | 25653071 | 25661098 | 8028  | 5 | .            |
| 27 | 25661098 | 25662051 | 954   | 5 | .            |
| 27 | 25662051 | 25663433 | 1383  | 5 | .            |
| 27 | 25663433 | 25665415 | 1983  | 5 | .            |
| 27 | 25665415 | 25667187 | 1773  | 5 | .            |
| 27 | 25667187 | 25668443 | 1257  | 5 | .            |
| 27 | 25668443 | 25668964 | 522   | 5 | .            |
| 27 | 25668964 | 25678192 | 9229  | 5 | .            |
| 27 | 25678192 | 25679304 | 1113  | 5 | .            |
| 27 | 25679304 | 25688548 | 9245  | 5 | .            |
| 27 | 25688548 | 25689452 | 905   | 5 | .            |
| 27 | 25689452 | 25694948 | 5497  | 5 | .            |
| 27 | 25694948 | 25695196 | 249   | 5 | .            |
| 27 | 25695196 | 25698106 | 2911  | 5 | .            |
| 27 | 25698106 | 25698709 | 604   | 5 | .            |
| 27 | 25698709 | 25700739 | 2031  | 5 | LOC101906081 |
| 27 | 25700739 | 25703248 | 2510  | 6 | LOC101906081 |
| 27 | 25703248 | 25705900 | 2653  | 6 | LOC101906081 |
| 27 | 25705900 | 25706751 | 852   | 5 | LOC101906081 |
| 27 | 25706751 | 25710123 | 3373  | 5 | LOC101906081 |
| 27 | 25710123 | 25711436 | 1314  | 5 | LOC101906081 |
| 27 | 25711436 | 25713587 | 2152  | 5 | LOC101906081 |
| 27 | 25713587 | 25714391 | 805   | 6 | LOC101906081 |
| 27 | 25714391 | 25718458 | 4068  | 5 | LOC101906081 |
| 27 | 25718458 | 25721586 | 3129  | 5 | LOC101906081 |
| 27 | 25721586 | 25722473 | 888   | 5 | LOC101906081 |
| 27 | 25722473 | 25727292 | 4820  | 5 | LOC101906081 |
| 27 | 25727292 | 25729476 | 2185  | 6 | .            |
| 27 | 25729476 | 25730676 | 1201  | 5 | .            |
| 27 | 25730676 | 25732588 | 1913  | 5 | .            |
| 27 | 25732588 | 25738859 | 6272  | 5 | .            |
| 27 | 25738859 | 25739188 | 330   | 5 | .            |
| 27 | 25739188 | 25742718 | 3531  | 5 | .            |
| 27 | 25742718 | 25745220 | 2503  | 5 | .            |
| 27 | 25745220 | 25746192 | 973   | 5 | .            |
| 27 | 25746192 | 25748865 | 2674  | 5 | .            |
| 27 | 25748865 | 25753771 | 4907  | 5 | .            |
| 27 | 25753771 | 25755454 | 1684  | 5 | .            |
| 27 | 25755454 | 25758131 | 2678  | 5 | .            |
| 27 | 25758131 | 25759444 | 1314  | 5 | .            |
| 27 | 25759444 | 25760793 | 1350  | 5 | .            |
| 27 | 25760793 | 25766085 | 5293  | 5 | .            |
| 27 | 25766085 | 25766588 | 504   | 4 | .            |
| 27 | 25766588 | 25767491 | 904   | 4 | .            |
| 27 | 25767491 | 25771933 | 4443  | 6 | .            |
| 27 | 25771933 | 25777524 | 5592  | 5 | .            |
| 27 | 25777524 | 25781093 | 3570  | 5 | .            |
| 27 | 25781093 | 25782693 | 1601  | 5 | RBPMS        |
| 27 | 25782693 | 25784029 | 1337  | 5 | RBPMS        |
| 27 | 25784029 | 25786041 | 2013  | 5 | RBPMS        |
| 27 | 25786041 | 25787310 | 1270  | 5 | RBPMS        |
| 27 | 25787310 | 25789326 | 2017  | 5 | RBPMS        |
| 27 | 25789326 | 25789930 | 605   | 5 | RBPMS        |
| 27 | 25789930 | 25795920 | 5991  | 5 | RBPMS        |
| 27 | 25795920 | 25796400 | 481   | 5 | RBPMS        |
| 27 | 25796400 | 25798665 | 2266  | 5 | RBPMS        |
| 27 | 25798665 | 25802510 | 3846  | 5 | RBPMS        |
| 27 | 25802510 | 25806734 | 4225  | 5 | RBPMS        |
| 27 | 25806734 | 25807250 | 517   | 4 | RBPMS        |
| 27 | 25807250 | 25807432 | 183   | 5 | RBPMS        |
| 27 | 25807432 | 25809219 | 1788  | 5 | RBPMS        |
| 27 | 25809219 | 25809365 | 147   | 5 | RBPMS        |

|    |          |          |       |   |               |
|----|----------|----------|-------|---|---------------|
| 27 | 25809365 | 25810363 | 999   | 5 | RBPMS         |
| 27 | 25810363 | 25811061 | 699   | 5 | RBPMS         |
| 27 | 25811061 | 25813135 | 2075  | 5 | RBPMS         |
| 27 | 25813135 | 25816418 | 3284  | 5 | RBPMS         |
| 27 | 25816418 | 25819989 | 3572  | 5 | RBPMS         |
| 27 | 25819989 | 25820294 | 306   | 5 | RBPMS         |
| 27 | 25820294 | 25821452 | 1159  | 5 | RBPMS         |
| 27 | 25821452 | 25821722 | 271   | 5 | RBPMS         |
| 27 | 25821722 | 25823257 | 1536  | 5 | RBPMS         |
| 27 | 25823257 | 25828943 | 5687  | 5 | RBPMS         |
| 27 | 25828943 | 25829691 | 749   | 5 | RBPMS         |
| 27 | 25829691 | 25829886 | 196   | 5 | RBPMS         |
| 27 | 25829886 | 25830634 | 749   | 6 | RBPMS         |
| 27 | 25830634 | 25831948 | 1315  | 5 | RBPMS         |
| 27 | 25831948 | 25832470 | 523   | 5 | RBPMS         |
| 27 | 25832470 | 25838195 | 5726  | 5 | RBPMS         |
| 27 | 25838195 | 25845915 | 7721  | 5 | RBPMS         |
| 27 | 25845915 | 25847741 | 1827  | 5 | RBPMS         |
| 27 | 25847741 | 25849391 | 1651  | 6 | RBPMS         |
| 27 | 25849391 | 25860013 | 10623 | 5 | MIR2399 RBPMS |
| 27 | 25860013 | 25860809 | 797   | 4 | RBPMS         |
| 27 | 25860809 | 25865434 | 4626  | 5 | RBPMS         |
| 27 | 25865434 | 25871042 | 5609  | 5 | RBPMS         |
| 27 | 25871042 | 25871230 | 189   | 5 | RBPMS         |
| 27 | 25871230 | 25881884 | 10655 | 5 | RBPMS         |
| 27 | 25881884 | 25892465 | 10582 | 5 | RBPMS         |
| 27 | 25892465 | 25892979 | 515   | 5 | RBPMS         |
| 27 | 25892979 | 25894181 | 1203  | 4 | RBPMS         |
| 27 | 25894181 | 25903305 | 9125  | 5 | RBPMS         |
| 27 | 25903305 | 25904370 | 1066  | 5 | RBPMS         |
| 27 | 25904370 | 25904836 | 467   | 5 | RBPMS         |
| 27 | 25904836 | 25908154 | 3319  | 5 | RBPMS         |
| 27 | 25908154 | 25911250 | 3097  | 5 | RBPMS         |
| 27 | 25911250 | 25911362 | 113   | 5 | RBPMS         |
| 27 | 25911362 | 25913806 | 2445  | 5 | RBPMS         |
| 27 | 25913806 | 25918471 | 4666  | 5 | RBPMS         |
| 27 | 25918471 | 25919415 | 945   | 6 | RBPMS         |
| 27 | 25919415 | 25924288 | 4874  | 5 | RBPMS         |
| 27 | 25924288 | 25925086 | 799   | 6 | RBPMS         |
| 27 | 25925086 | 25925269 | 184   | 6 | RBPMS         |
| 27 | 25925269 | 25926519 | 1251  | 5 | RBPMS         |
| 27 | 25926519 | 25929942 | 3424  | 5 | RBPMS         |
| 27 | 25929942 | 25940216 | 10275 | 5 | RBPMS         |
| 27 | 25940216 | 25946787 | 6572  | 5 | RBPMS         |
| 27 | 25946787 | 25950472 | 3686  | 5 | RBPMS         |
| 27 | 25950472 | 25950797 | 326   | 6 | RBPMS         |
| 27 | 25950797 | 25955185 | 4389  | 5 | RBPMS         |
| 27 | 25955185 | 25956095 | 911   | 5 | RBPMS         |
| 27 | 25956095 | 25960913 | 4819  | 5 | RBPMS         |
| 27 | 25960913 | 25961066 | 154   | 5 | .             |
| 27 | 25961066 | 25963312 | 2247  | 6 | .             |
| 27 | 25963312 | 25970245 | 6934  | 5 | .             |
| 27 | 25970245 | 25971071 | 827   | 5 | .             |
| 27 | 25971071 | 25982769 | 11699 | 5 | .             |
| 27 | 25982769 | 25982837 | 69    | 5 | .             |
| 27 | 25982837 | 25983642 | 806   | 5 | .             |
| 27 | 25983642 | 25993976 | 10335 | 5 | GTF2E2        |
| 27 | 25993976 | 26000840 | 6865  | 5 | GTF2E2        |
| 27 | 26000840 | 26001044 | 205   | 6 | GTF2E2        |
| 27 | 26001044 | 26001384 | 341   | 7 | GTF2E2        |
| 27 | 26001384 | 26002046 | 663   | 6 | GTF2E2        |
| 27 | 26002046 | 26002446 | 401   | 6 | GTF2E2        |
| 27 | 26002446 | 26005736 | 3291  | 5 | GTF2E2        |
| 27 | 26005736 | 26007300 | 1565  | 5 | GTF2E2        |
| 27 | 26007300 | 26012401 | 5102  | 5 | GTF2E2        |
| 27 | 26012401 | 26012917 | 517   | 4 | GTF2E2        |
| 27 | 26012917 | 26014160 | 1244  | 5 | GTF2E2        |
| 27 | 26014160 | 26014744 | 585   | 5 | GTF2E2        |
| 27 | 26014744 | 26015892 | 1149  | 5 | GTF2E2        |
| 27 | 26015892 | 26016070 | 179   | 5 | GTF2E2        |
| 27 | 26016070 | 26030264 | 14195 | 5 | GTF2E2        |
| 27 | 26030264 | 26030990 | 727   | 5 | GTF2E2        |
| 27 | 26030990 | 26035090 | 4101  | 5 | GTF2E2        |
| 27 | 26035090 | 26035275 | 186   | 4 | GTF2E2        |
| 27 | 26035275 | 26040751 | 5477  | 5 | GTF2E2        |
| 27 | 26040751 | 26041412 | 662   | 5 | GTF2E2        |
| 27 | 26041412 | 26044782 | 3371  | 5 | GTF2E2        |
| 27 | 26044782 | 26050765 | 5984  | 6 | GTF2E2 SMIM18 |
| 27 | 26050765 | 26052382 | 1618  | 5 | GTF2E2 SMIM18 |
| 27 | 26052382 | 26052592 | 211   | 5 | GTF2E2 SMIM18 |
| 27 | 26052592 | 26052782 | 191   | 6 | GTF2E2 SMIM18 |
| 27 | 26052782 | 26053007 | 226   | 5 | GTF2E2 SMIM18 |
| 27 | 26053007 | 26056410 | 3404  | 6 | GTF2E2 SMIM18 |
| 27 | 26056410 | 26057610 | 1201  | 5 | GTF2E2        |
| 27 | 26057610 | 26059937 | 2328  | 5 | GTF2E2        |
| 27 | 26059937 | 26063309 | 3373  | 5 | GTF2E2        |
| 27 | 26063309 | 26066233 | 2925  | 6 | GTF2E2        |
| 27 | 26066233 | 26066612 | 380   | 5 | GTF2E2        |
| 27 | 26066612 | 26081369 | 14758 | 5 | GTF2E2        |
| 27 | 26081369 | 26081910 | 542   | 5 | .             |
| 27 | 26081910 | 26082070 | 161   | 4 | .             |

|    |          |          |       |   |              |
|----|----------|----------|-------|---|--------------|
| 27 | 26082070 | 26082978 | 909   | 6 | .            |
| 27 | 26082978 | 26092491 | 9514  | 6 | GSR          |
| 27 | 26092491 | 26093062 | 572   | 5 | GSR          |
| 27 | 26093062 | 26093424 | 363   | 5 | GSR          |
| 27 | 26093424 | 26094275 | 852   | 5 | GSR          |
| 27 | 26094275 | 26094516 | 242   | 5 | GSR          |
| 27 | 26094516 | 26094677 | 162   | 5 | GSR          |
| 27 | 26094677 | 26095871 | 1195  | 5 | GSR          |
| 27 | 26095871 | 26096363 | 493   | 5 | GSR          |
| 27 | 26096363 | 26101946 | 5584  | 5 | GSR          |
| 27 | 26101946 | 26102309 | 364   | 5 | GSR          |
| 27 | 26102309 | 26103251 | 943   | 5 | GSR          |
| 27 | 26103251 | 26109062 | 5812  | 5 | GSR          |
| 27 | 26109062 | 26111290 | 2229  | 5 | GSR          |
| 27 | 26111290 | 26113678 | 2389  | 5 | GSR          |
| 27 | 26113678 | 26115917 | 2240  | 5 | GSR          |
| 27 | 26115917 | 26116173 | 257   | 4 | GSR          |
| 27 | 26116173 | 26116349 | 177   | 3 | GSR          |
| 27 | 26116349 | 26116646 | 298   | 4 | GSR          |
| 27 | 26116646 | 26121530 | 4885  | 5 | GSR          |
| 27 | 26121530 | 26121735 | 206   | 5 | GSR          |
| 27 | 26121735 | 26122849 | 1115  | 4 | GSR          |
| 27 | 26122849 | 26126705 | 3857  | 4 | GSR          |
| 27 | 26126705 | 26132301 | 5597  | 4 | GSR          |
| 27 | 26132301 | 26132736 | 436   | 4 | GSR          |
| 27 | 26132736 | 26135351 | 2616  | 4 | GSR          |
| 27 | 26135351 | 26138456 | 3106  | 4 | LOC782955    |
| 27 | 26138456 | 26142409 | 3954  | 4 | LOC782955    |
| 27 | 26142409 | 26144728 | 2320  | 5 | .            |
| 27 | 26144728 | 26146139 | 1412  | 5 | .            |
| 27 | 26146139 | 26146538 | 400   | 5 | .            |
| 27 | 26146538 | 26154308 | 7771  | 5 | UBXN8        |
| 27 | 26154308 | 26156574 | 2267  | 5 | UBXN8        |
| 27 | 26156574 | 26160526 | 3953  | 5 | UBXN8        |
| 27 | 26160526 | 26164925 | 4400  | 4 | UBXN8        |
| 27 | 26164925 | 26171176 | 6252  | 4 | UBXN8        |
| 27 | 26171176 | 26172306 | 1131  | 4 | UBXN8        |
| 27 | 26172306 | 26173360 | 1055  | 4 | .            |
| 27 | 26173360 | 26180587 | 7228  | 4 | .            |
| 27 | 26180587 | 26181114 | 528   | 5 | .            |
| 27 | 26181114 | 26185250 | 4137  | 4 | .            |
| 27 | 26185250 | 26188664 | 3415  | 4 | PPP2CB       |
| 27 | 26188664 | 26191741 | 3078  | 4 | PPP2CB       |
| 27 | 26191741 | 26193730 | 1990  | 4 | PPP2CB       |
| 27 | 26193730 | 26195177 | 1448  | 5 | PPP2CB       |
| 27 | 26195177 | 26197362 | 2186  | 4 | PPP2CB       |
| 27 | 26197362 | 26204835 | 7474  | 4 | PPP2CB       |
| 27 | 26204835 | 26209799 | 4965  | 4 | PPP2CB       |
| 27 | 26209799 | 26211210 | 1412  | 4 | PPP2CB       |
| 27 | 26211210 | 26213486 | 2277  | 4 | .            |
| 27 | 26213486 | 26215051 | 1566  | 4 | .            |
| 27 | 26215051 | 26217015 | 1965  | 4 | .            |
| 27 | 26217015 | 26230960 | 13946 | 4 | TEX15        |
| 27 | 26230960 | 26231878 | 919   | 4 | TEX15        |
| 27 | 26231878 | 26236145 | 4268  | 4 | TEX15        |
| 27 | 26236145 | 26251936 | 15792 | 4 | TEX15        |
| 27 | 26251936 | 26262871 | 10936 | 4 | TEX15        |
| 27 | 26262871 | 26263249 | 379   | 5 | TEX15        |
| 27 | 26263249 | 26263518 | 270   | 6 | TEX15        |
| 27 | 26263518 | 26269290 | 5773  | 4 | TEX15        |
| 27 | 26269290 | 26270583 | 1294  | 4 | TEX15        |
| 27 | 26270583 | 26270980 | 398   | 4 | TEX15        |
| 27 | 26270980 | 26281163 | 10184 | 4 | TEX15        |
| 27 | 26281163 | 26285527 | 4365  | 5 | TEX15        |
| 27 | 26285527 | 26287247 | 1721  | 6 | TEX15        |
| 27 | 26287247 | 26287436 | 190   | 5 | TEX15        |
| 27 | 26287436 | 26289107 | 1672  | 6 | TEX15        |
| 27 | 26289107 | 26295262 | 6156  | 5 | TEX15        |
| 27 | 26295262 | 26298970 | 3709  | 4 | .            |
| 27 | 26298970 | 26300322 | 1353  | 4 | .            |
| 27 | 26300322 | 26302575 | 2254  | 4 | LOC107131911 |
| 27 | 26302575 | 26312013 | 9439  | 4 | LOC107131911 |
| 27 | 26312013 | 26314680 | 2668  | 4 | .            |
| 27 | 26314680 | 26324299 | 9620  | 4 | .            |
| 27 | 26324299 | 26325925 | 1627  | 5 | .            |
| 27 | 26325925 | 26328123 | 2199  | 4 | .            |
| 27 | 26328123 | 26333889 | 5767  | 4 | .            |
| 27 | 26333889 | 26334709 | 821   | 3 | .            |
| 27 | 26334709 | 26336952 | 2244  | 4 | .            |
| 27 | 26336952 | 26341526 | 4575  | 4 | .            |
| 27 | 26341526 | 26342123 | 598   | 4 | .            |
| 27 | 26342123 | 26342681 | 559   | 4 | .            |
| 27 | 26342681 | 26345283 | 2603  | 4 | LOC104976090 |
| 27 | 26345283 | 26346432 | 1150  | 4 | LOC104976090 |
| 27 | 26346432 | 26347700 | 1269  | 4 | LOC104976090 |
| 27 | 26347700 | 26348418 | 719   | 3 | LOC104976090 |
| 27 | 26348418 | 26348589 | 172   | 2 | LOC104976090 |
| 27 | 26348589 | 26348689 | 101   | 2 | LOC104976090 |
| 27 | 38360905 | 38361292 | 388   | 2 | .            |
| 27 | 38398324 | 38401369 | 3046  | 2 | .            |
| 27 | 38401369 | 38402179 | 811   | 2 | .            |

|    |          |          |       |   |        |
|----|----------|----------|-------|---|--------|
| 27 | 38402179 | 38403747 | 1569  | 2 | .      |
| 27 | 38403747 | 38404581 | 835   | 2 | .      |
| 27 | 38404581 | 38404690 | 110   | 2 | .      |
| 27 | 38404690 | 38405210 | 521   | 2 | .      |
| 27 | 38405210 | 38406204 | 995   | 2 | .      |
| 27 | 38406204 | 38408898 | 2695  | 2 | .      |
| 27 | 38408898 | 38409298 | 401   | 2 | .      |
| 27 | 38409298 | 38411169 | 1872  | 2 | .      |
| 27 | 38411169 | 38425877 | 14709 | 2 | .      |
| 27 | 38425877 | 38426189 | 313   | 2 | .      |
| 27 | 38426189 | 38427510 | 1322  | 2 | .      |
| 27 | 38427510 | 38427841 | 332   | 2 | .      |
| 27 | 38427841 | 38428673 | 833   | 2 | .      |
| 27 | 38428673 | 38429397 | 725   | 2 | .      |
| 27 | 38429397 | 38429982 | 586   | 2 | .      |
| 27 | 38429982 | 38441026 | 11045 | 2 | .      |
| 27 | 38441026 | 38441395 | 370   | 2 | .      |
| 27 | 38441395 | 38442830 | 1436  | 2 | .      |
| 27 | 38442830 | 38458420 | 15591 | 2 | .      |
| 27 | 38458420 | 38459936 | 1517  | 2 | .      |
| 27 | 38459936 | 38469125 | 9190  | 2 | .      |
| 27 | 38469125 | 38476609 | 7485  | 2 | .      |
| 27 | 38476609 | 38491560 | 14952 | 2 | .      |
| 27 | 38491560 | 38500791 | 9232  | 2 | .      |
| 27 | 38500791 | 38501597 | 807   | 2 | .      |
| 27 | 38501597 | 38509392 | 7796  | 2 | .      |
| 27 | 38509392 | 38509538 | 147   | 2 | .      |
| 27 | 38509538 | 38510724 | 1187  | 2 | .      |
| 27 | 38510724 | 38521911 | 11188 | 2 | .      |
| 27 | 38523092 | 38530512 | 7421  | 2 | .      |
| 27 | 38530512 | 38534818 | 4307  | 2 | .      |
| 27 | 38534818 | 38537296 | 2479  | 2 | .      |
| 27 | 38537296 | 38537973 | 678   | 2 | .      |
| 27 | 38537973 | 38538783 | 811   | 2 | .      |
| 27 | 38538783 | 38538912 | 130   | 2 | .      |
| 27 | 38538912 | 38539701 | 790   | 2 | .      |
| 27 | 38539701 | 38541123 | 1423  | 2 | .      |
| 27 | 38541123 | 38559781 | 18659 | 2 | .      |
| 27 | 38559781 | 38571874 | 12094 | 2 | .      |
| 27 | 38571874 | 38573654 | 1781  | 2 | .      |
| 27 | 38573654 | 38574873 | 1220  | 3 | .      |
| 27 | 38574873 | 38575207 | 335   | 3 | .      |
| 27 | 38575207 | 38575857 | 651   | 2 | .      |
| 27 | 38575857 | 38585326 | 9470  | 2 | .      |
| 27 | 38585326 | 38586720 | 1395  | 2 | .      |
| 27 | 38586720 | 38587904 | 1185  | 2 | .      |
| 27 | 38587904 | 38588641 | 738   | 2 | .      |
| 27 | 38588641 | 38588788 | 148   | 2 | .      |
| 27 | 38588788 | 38590409 | 1622  | 2 | .      |
| 27 | 38590409 | 38591278 | 870   | 2 | .      |
| 27 | 38591278 | 38594284 | 3007  | 2 | .      |
| 27 | 38594284 | 38597955 | 3672  | 2 | .      |
| 27 | 38597955 | 38600101 | 2147  | 2 | .      |
| 27 | 38600101 | 38603612 | 3512  | 2 | .      |
| 27 | 38603612 | 38604091 | 480   | 2 | .      |
| 27 | 38673881 | 38674849 | 969   | 2 | .      |
| 27 | 38674849 | 38675887 | 1039  | 2 | .      |
| 27 | 38675887 | 38679439 | 3553  | 2 | .      |
| 27 | 38679439 | 38689702 | 10264 | 2 | .      |
| 27 | 38689702 | 38691279 | 1578  | 2 | .      |
| 27 | 38691279 | 38701826 | 10548 | 2 | .      |
| 27 | 38702212 | 38702903 | 692   | 2 | .      |
| 27 | 38702903 | 38719043 | 16141 | 2 | .      |
| 27 | 38719043 | 38722021 | 2979  | 2 | .      |
| 27 | 38722021 | 38724414 | 2394  | 2 | .      |
| 27 | 38724414 | 38726171 | 1758  | 2 | .      |
| 27 | 38726171 | 38742663 | 16493 | 2 | PSD3   |
| 27 | 38857761 | 38859757 | 1997  | 2 | PSD3   |
| 27 | 39394600 | 39401315 | 6716  | 2 | LRRC3B |
| 27 | 39401315 | 39402951 | 1637  | 2 | LRRC3B |
| 27 | 39402951 | 39406429 | 3479  | 2 | LRRC3B |
| 27 | 39476968 | 39477355 | 388   | 2 | LRRC3B |
| 27 | 39529187 | 39529309 | 123   | 2 | .      |
| 27 | 39760649 | 39761558 | 910   | 2 | .      |
| 27 | 39785111 | 39785444 | 334   | 2 | .      |
| 27 | 39841340 | 39843522 | 2183  | 2 | .      |
| 27 | 39843522 | 39844175 | 654   | 2 | .      |
| 27 | 39960489 | 39960753 | 265   | 2 | .      |
| 27 | 39985140 | 39986278 | 1139  | 2 | .      |
| 27 | 39986278 | 39986906 | 629   | 2 | .      |
| 27 | 39986906 | 39987280 | 375   | 2 | .      |
| 27 | 39987280 | 39987536 | 257   | 2 | .      |
| 27 | 39987536 | 39991116 | 3581  | 2 | .      |
| 27 | 39991116 | 39994662 | 3547  | 2 | .      |
| 27 | 40033585 | 40034107 | 523   | 2 | .      |
| 27 | 40034107 | 40034176 | 70    | 2 | .      |
| 27 | 40034176 | 40034398 | 223   | 2 | .      |
| 27 | 40046559 | 40047761 | 1203  | 2 | .      |
| 28 | 45232    | 45747    | 516   | 2 | .      |
| 28 | 92191    | 104300   | 12110 | 2 | .      |
| 28 | 104300   | 108746   | 4447  | 2 | .      |

|    |        |        |       |   |                     |
|----|--------|--------|-------|---|---------------------|
| 28 | 146504 | 146678 | 175   | 2 | .                   |
| 28 | 264682 | 264877 | 196   | 2 | .                   |
| 28 | 297478 | 299311 | 1834  | 2 | CCSAP               |
| 28 | 299311 | 308614 | 9304  | 2 | CCSAP               |
| 28 | 308614 | 309218 | 605   | 2 | CCSAP               |
| 28 | 309218 | 312503 | 3286  | 2 | CCSAP LOC107131917  |
| 28 | 312503 | 329497 | 16995 | 2 | LOC107131917        |
| 28 | 329497 | 332609 | 3113  | 2 | LOC107131917        |
| 28 | 335315 | 338267 | 2953  | 2 | LOC107131917        |
| 28 | 338267 | 339167 | 901   | 2 | LOC107131917        |
| 28 | 339167 | 342070 | 2904  | 2 | LOC107131917        |
| 28 | 342070 | 343224 | 1155  | 2 | LOC107131917        |
| 28 | 343224 | 343688 | 465   | 2 | LOC107131917        |
| 28 | 343688 | 348770 | 5083  | 2 | .                   |
| 28 | 348770 | 369750 | 20981 | 2 | LOC100848254        |
| 28 | 369750 | 371582 | 1833  | 2 | .                   |
| 28 | 371582 | 372422 | 841   | 2 | .                   |
| 28 | 372422 | 382883 | 10462 | 2 | LOC789763           |
| 28 | 382883 | 397069 | 14187 | 2 | .                   |
| 28 | 397069 | 405723 | 8655  | 2 | .                   |
| 28 | 405723 | 421534 | 15812 | 2 | .                   |
| 28 | 421534 | 431362 | 9829  | 2 | .                   |
| 28 | 431362 | 434607 | 3246  | 2 | ACTA1               |
| 28 | 434607 | 435611 | 1005  | 2 | .                   |
| 28 | 435611 | 436190 | 580   | 2 | .                   |
| 28 | 436190 | 442350 | 6161  | 2 | NUP133              |
| 28 | 442350 | 443507 | 1158  | 3 | NUP133              |
| 28 | 443507 | 452557 | 9051  | 2 | NUP133              |
| 28 | 452557 | 466570 | 14014 | 2 | NUP133              |
| 28 | 466570 | 467836 | 1267  | 2 | NUP133              |
| 28 | 467836 | 469226 | 1391  | 2 | NUP133              |
| 28 | 469226 | 477194 | 7969  | 2 | NUP133              |
| 28 | 477194 | 478043 | 850   | 2 | NUP133              |
| 28 | 478043 | 478366 | 324   | 3 | NUP133              |
| 28 | 478366 | 480983 | 2618  | 2 | NUP133              |
| 28 | 480983 | 487027 | 6045  | 2 | NUP133              |
| 28 | 487027 | 489569 | 2543  | 2 | NUP133              |
| 28 | 489569 | 494506 | 4938  | 2 | LOC100140514 NUP133 |
| 28 | 494506 | 495628 | 1123  | 2 | NUP133              |
| 28 | 495628 | 499425 | 3798  | 2 | NUP133              |
| 28 | 499425 | 507781 | 8357  | 2 | ABCB10              |
| 28 | 507781 | 531978 | 24198 | 2 | ABCB10              |
| 28 | 531978 | 532403 | 426   | 3 | ABCB10              |
| 28 | 532403 | 548101 | 15699 | 2 | ABCB10              |
| 28 | 548101 | 558763 | 10663 | 2 | .                   |
| 28 | 558763 | 559136 | 374   | 2 | .                   |
| 28 | 559136 | 560259 | 1124  | 2 | .                   |
| 28 | 560259 | 561549 | 1291  | 2 | .                   |
| 28 | 561549 | 609396 | 47848 | 2 | TAF5L URB2          |
| 28 | 609396 | 624008 | 14613 | 2 | URB2                |
| 28 | 624008 | 627840 | 3833  | 2 | URB2                |
| 28 | 627840 | 635283 | 7444  | 2 | URB2                |
| 28 | 635283 | 637011 | 1729  | 3 | URB2                |
| 28 | 637011 | 642959 | 5949  | 2 | .                   |
| 28 | 642959 | 649178 | 6220  | 2 | .                   |
| 28 | 649178 | 676276 | 27099 | 2 | .                   |
| 28 | 676276 | 687965 | 11690 | 2 | .                   |
| 28 | 687965 | 688303 | 339   | 2 | .                   |
| 28 | 688303 | 689690 | 1388  | 2 | .                   |
| 28 | 689690 | 690086 | 397   | 2 | .                   |
| 28 | 690086 | 690576 | 491   | 2 | .                   |
| 28 | 690576 | 692397 | 1822  | 2 | .                   |
| 28 | 692397 | 693262 | 866   | 3 | .                   |
| 28 | 693262 | 694050 | 789   | 3 | .                   |
| 28 | 694050 | 703668 | 9619  | 2 | .                   |
| 28 | 703668 | 719237 | 15570 | 2 | .                   |
| 28 | 719237 | 721561 | 2325  | 2 | .                   |
| 28 | 721561 | 735583 | 14023 | 2 | .                   |
| 28 | 735583 | 752622 | 17040 | 2 | .                   |
| 28 | 752622 | 756172 | 3551  | 2 | .                   |
| 28 | 756172 | 777385 | 21214 | 2 | .                   |
| 28 | 777385 | 779853 | 2469  | 2 | .                   |
| 28 | 779853 | 785921 | 6069  | 2 | .                   |
| 28 | 785921 | 787302 | 1382  | 2 | .                   |
| 28 | 787302 | 799827 | 12526 | 2 | LOC783687           |
| 28 | 799827 | 805530 | 5704  | 3 | .                   |
| 28 | 805530 | 812715 | 7186  | 3 | .                   |
| 28 | 812715 | 814038 | 1324  | 3 | .                   |
| 28 | 814038 | 824117 | 10080 | 3 | .                   |
| 28 | 824117 | 826786 | 2670  | 3 | .                   |
| 28 | 826786 | 829492 | 2707  | 2 | .                   |
| 28 | 829492 | 834016 | 4525  | 2 | .                   |
| 28 | 834016 | 845461 | 11446 | 2 | .                   |
| 28 | 845461 | 846037 | 577   | 2 | .                   |
| 28 | 846037 | 863230 | 17194 | 2 | .                   |
| 28 | 863230 | 868942 | 5713  | 2 | .                   |
| 28 | 868942 | 870144 | 1203  | 2 | .                   |
| 28 | 870144 | 870839 | 696   | 2 | .                   |
| 28 | 870839 | 874529 | 3691  | 2 | .                   |
| 28 | 874529 | 896793 | 22265 | 2 | .                   |
| 28 | 896793 | 898812 | 2020  | 2 | .                   |

|    |         |         |       |   |                    |
|----|---------|---------|-------|---|--------------------|
| 28 | 898812  | 904007  | 5196  | 2 | .                  |
| 28 | 904007  | 904605  | 599   | 2 | .                  |
| 28 | 904605  | 913122  | 8518  | 2 | .                  |
| 28 | 913122  | 913994  | 873   | 2 | .                  |
| 28 | 913994  | 915607  | 1614  | 3 | .                  |
| 28 | 915607  | 916477  | 871   | 3 | .                  |
| 28 | 916477  | 918384  | 1908  | 2 | .                  |
| 28 | 918384  | 928005  | 9622  | 2 | .                  |
| 28 | 928005  | 950401  | 22397 | 2 | .                  |
| 28 | 950401  | 950528  | 128   | 2 | .                  |
| 28 | 950528  | 953069  | 2542  | 3 | .                  |
| 28 | 953069  | 964120  | 11052 | 3 | .                  |
| 28 | 964120  | 968894  | 4775  | 3 | .                  |
| 28 | 968894  | 1002610 | 33717 | 2 | .                  |
| 28 | 1004505 | 1013898 | 9394  | 2 | .                  |
| 28 | 1013898 | 1014152 | 255   | 2 | .                  |
| 28 | 1014152 | 1014220 | 69    | 2 | .                  |
| 28 | 1014220 | 1014945 | 726   | 2 | .                  |
| 28 | 1014945 | 1016828 | 1884  | 2 | .                  |
| 28 | 1016828 | 1020223 | 3396  | 2 | .                  |
| 28 | 1020223 | 1024605 | 4383  | 2 | .                  |
| 28 | 1024605 | 1025431 | 827   | 2 | .                  |
| 28 | 1025431 | 1028094 | 2664  | 2 | .                  |
| 28 | 1028094 | 1028787 | 694   | 2 | .                  |
| 28 | 1028787 | 1038665 | 9879  | 2 | .                  |
| 28 | 1038665 | 1039502 | 838   | 2 | .                  |
| 28 | 1039502 | 1055293 | 15792 | 2 | .                  |
| 28 | 1055293 | 1055833 | 541   | 3 | .                  |
| 28 | 1055833 | 1061066 | 5234  | 2 | .                  |
| 28 | 1061066 | 1062699 | 1634  | 2 | .                  |
| 28 | 1062699 | 1070553 | 7855  | 2 | .                  |
| 28 | 1070553 | 1070892 | 340   | 2 | .                  |
| 28 | 1070892 | 1075576 | 4685  | 2 | .                  |
| 28 | 1075576 | 1090881 | 15306 | 2 | .                  |
| 28 | 1090881 | 1102456 | 11576 | 2 | .                  |
| 28 | 1102456 | 1106619 | 4164  | 3 | .                  |
| 28 | 1106619 | 1135758 | 29140 | 2 | .                  |
| 28 | 1135758 | 1139178 | 3421  | 2 | .                  |
| 28 | 1139178 | 1187089 | 47912 | 2 | GALNT2             |
| 28 | 1187089 | 1189778 | 2690  | 2 | GALNT2             |
| 28 | 1189778 | 1218206 | 28429 | 2 | GALNT2             |
| 28 | 1218206 | 1222776 | 4571  | 2 | GALNT2             |
| 28 | 1222776 | 1222861 | 86    | 2 | GALNT2             |
| 28 | 1222861 | 1244154 | 21294 | 2 | GALNT2             |
| 28 | 1244154 | 1254058 | 9905  | 2 | GALNT2             |
| 28 | 1254058 | 1264239 | 10182 | 2 | GALNT2             |
| 28 | 1264239 | 1276872 | 12634 | 2 | GALNT2             |
| 28 | 1276872 | 1290588 | 13717 | 2 | GALNT2             |
| 28 | 1291072 | 1297324 | 6253  | 2 | GALNT2             |
| 28 | 1297324 | 1313769 | 16446 | 2 | GALNT2             |
| 28 | 1336807 | 1356648 | 19842 | 2 | .                  |
| 28 | 1356648 | 1357520 | 873   | 2 | .                  |
| 28 | 1357520 | 1360454 | 2935  | 3 | .                  |
| 28 | 1360454 | 1361679 | 1226  | 3 | .                  |
| 28 | 1361679 | 1373400 | 11722 | 3 | PGBD5              |
| 28 | 1373400 | 1386643 | 13244 | 3 | PGBD5              |
| 28 | 1386643 | 1387484 | 842   | 3 | PGBD5              |
| 28 | 1387484 | 1392079 | 4596  | 3 | PGBD5              |
| 28 | 1392079 | 1405164 | 13086 | 3 | PGBD5              |
| 28 | 1405164 | 1414575 | 9412  | 3 | PGBD5              |
| 28 | 1414575 | 1421620 | 7046  | 3 | PGBD5              |
| 28 | 1421620 | 1421887 | 268   | 3 | PGBD5              |
| 28 | 1421887 | 1423295 | 1409  | 3 | PGBD5              |
| 28 | 1423295 | 1423502 | 208   | 3 | PGBD5              |
| 28 | 1423502 | 1425058 | 1557  | 3 | PGBD5              |
| 28 | 1425058 | 1426023 | 966   | 3 | PGBD5              |
| 28 | 1426023 | 1433613 | 7591  | 3 | PGBD5              |
| 28 | 1433613 | 1433793 | 181   | 3 | PGBD5              |
| 28 | 1433793 | 1438663 | 4871  | 3 | PGBD5              |
| 28 | 1438663 | 1438984 | 322   | 2 | PGBD5              |
| 28 | 1438984 | 1442722 | 3739  | 3 | PGBD5              |
| 28 | 1442722 | 1444261 | 1540  | 3 | PGBD5              |
| 28 | 1444261 | 1448968 | 4708  | 3 | PGBD5              |
| 28 | 1448968 | 1454106 | 5139  | 3 | PGBD5              |
| 28 | 1454106 | 1455559 | 1454  | 4 | PGBD5              |
| 28 | 1455559 | 1469877 | 14319 | 3 | LOC107133413 PGBD5 |
| 28 | 1469877 | 1477834 | 7958  | 3 | LOC107133413       |
| 28 | 1477834 | 1488227 | 10394 | 3 | LOC107133413       |
| 28 | 1488227 | 1489127 | 901   | 3 | LOC107133413       |
| 28 | 1489127 | 1489979 | 853   | 3 | LOC107133413       |
| 28 | 1489979 | 1491738 | 1760  | 3 | LOC107133413       |
| 28 | 1491738 | 1492052 | 315   | 4 | LOC107133413       |
| 28 | 1492052 | 1502363 | 10312 | 3 | LOC107133413       |
| 28 | 1502363 | 1503374 | 1012  | 2 | LOC107133413       |
| 28 | 1503374 | 1504344 | 971   | 2 | LOC107133413       |
| 28 | 1504344 | 1507418 | 3075  | 2 | LOC107133413       |
| 28 | 1507418 | 1514543 | 7126  | 3 | LOC107133413       |
| 28 | 1514543 | 1540512 | 25970 | 3 | LOC107133413       |
| 28 | 1540512 | 1543087 | 2576  | 3 | .                  |
| 28 | 1543087 | 1548452 | 5366  | 3 | .                  |
| 28 | 1548452 | 1548793 | 342   | 3 | .                  |



|    |                |                |              |          |                        |
|----|----------------|----------------|--------------|----------|------------------------|
| 28 | 2959274        | 2962600        | 3327         | 2        | LOC100336396           |
| 28 | 2962600        | 2982774        | 20175        | 2        | LOC100336396           |
| 28 | 2982774        | 2983978        | 1205         | 2        | LOC100336396           |
| 28 | 2983978        | 2990836        | 6859         | 2        | LOC100336396           |
| 28 | 2990836        | 2992912        | 2077         | 2        | LOC100336396           |
| 28 | 2992912        | 2994982        | 2071         | 2        | LOC100336396           |
| 28 | 2994982        | 2996933        | 1952         | 2        | LOC100336396           |
| 28 | 2996933        | 2998645        | 1713         | 2        | .                      |
| 28 | 2998645        | 3024400        | 25756        | 2        | .                      |
| 28 | 3024400        | 3032096        | 7697         | 2        | .                      |
| 28 | 3032096        | 3033782        | 1687         | 2        | .                      |
| 28 | 3033782        | 3036602        | 2821         | 2        | .                      |
| 28 | 3036602        | 3046018        | 9417         | 2        | .                      |
| 28 | 3046018        | 3047152        | 1135         | 2        | .                      |
| 28 | 3047152        | 3059303        | 12152        | 2        | .                      |
| 28 | 3059303        | 3059844        | 542          | 2        | .                      |
| 28 | 3059844        | 3061976        | 2133         | 2        | .                      |
| 28 | 3061976        | 3068829        | 6854         | 2        | .                      |
| 28 | 3068829        | 3069664        | 836          | 2        | .                      |
| 28 | 3069664        | 3072454        | 2791         | 2        | .                      |
| 28 | 3072454        | 3074095        | 1642         | 3        | TSNAX                  |
| 28 | 3074095        | 3085037        | 10943        | 2        | TSNAX                  |
| 28 | 3085037        | 3089423        | 4387         | 2        | TSNAX                  |
| 28 | 3089423        | 3107411        | 17989        | 2        | TSNAX                  |
| 28 | 3107895        | 3113554        | 5660         | 2        | TSNAX                  |
| 28 | 3113554        | 3116630        | 3077         | 2        | .                      |
| 28 | 3116630        | 3118159        | 1530         | 2        | .                      |
| 28 | 3118159        | 3118500        | 342          | 2        | .                      |
| 28 | 3118500        | 3123732        | 5233         | 2        | .                      |
| 28 | 3123732        | 3125958        | 2227         | 2        | .                      |
| 28 | 3125958        | 3130152        | 4195         | 2        | .                      |
| 28 | 3130152        | 3131175        | 1024         | 3        | .                      |
| 28 | 3131175        | 3135239        | 4065         | 2        | .                      |
| 28 | 3135445        | 3137255        | 1811         | 2        | .                      |
| 28 | 3137255        | 3139022        | 1768         | 2        | .                      |
| 28 | 3139022        | 3145192        | 6171         | 2        | .                      |
| 28 | 3145192        | 3146314        | 1123         | 2        | .                      |
| 28 | 3146314        | 3146883        | 570          | 2        | .                      |
| 28 | 3146883        | 3149004        | 2122         | 2        | .                      |
| 28 | 3149004        | 3155973        | 6970         | 2        | .                      |
| 28 | 3155973        | 3156377        | 405          | 3        | .                      |
| 28 | 3156377        | 3167005        | 10629        | 2        | .                      |
| 28 | 3167005        | 3167867        | 863          | 2        | .                      |
| 28 | 3167867        | 3183763        | 15897        | 2        | LOC107131921           |
| 28 | 3183763        | 3207827        | 24065        | 2        | LOC107131921 LOC533307 |
| 28 | 3207827        | 3210667        | 2841         | 2        | .                      |
| 28 | 3210667        | 3235891        | 25225        | 2        | LOC784492              |
| 28 | 3235891        | 3236642        | 752          | 2        | .                      |
| 28 | 3236642        | 3239684        | 3043         | 2        | .                      |
| 28 | 3239684        | 3240742        | 1059         | 2        | .                      |
| 28 | 3240742        | 3250265        | 9524         | 2        | .                      |
| 28 | 3250265        | 3267421        | 17157        | 3        | .                      |
| 28 | 3267421        | 3272244        | 4824         | 3        | .                      |
| 28 | 3272244        | 3273826        | 1583         | 4        | .                      |
| 28 | 3273826        | 3277196        | 3371         | 3        | .                      |
| 28 | 3277196        | 3297645        | 20450        | 2        | .                      |
| 28 | <b>3297645</b> | <b>3318884</b> | <b>21240</b> | <b>2</b> | <b>EGLN1</b>           |
| 28 | 3318884        | 3341051        | 22168        | 3        | .                      |
| 28 | 3341051        | 3351556        | 10506        | 3        | .                      |
| 28 | 3351556        | 3354386        | 2831         | 3        | .                      |
| 28 | 3354386        | 3356258        | 1873         | 4        | LOC107131274           |
| 28 | 3356258        | 3356657        | 400          | 4        | LOC107131274           |
| 28 | 3356657        | 3357374        | 718          | 4        | LOC107131274           |
| 28 | 3357374        | 3368991        | 11618        | 4        | LOC107131274           |
| 28 | 3368991        | 3369469        | 479          | 5        | .                      |
| 28 | 3369469        | 3369654        | 186          | 4        | .                      |
| 28 | 3369654        | 3405166        | 35513        | 4        | EXOC8 SPRTN            |
| 28 | 3405166        | 3406176        | 1011         | 3        | .                      |
| 28 | 3406176        | 3407061        | 886          | 4        | .                      |
| 28 | 3407061        | 3440753        | 33693        | 3        | GNPAT                  |
| 28 | 3440753        | 3445445        | 4693         | 3        | GNPAT                  |
| 28 | 3445445        | 3447690        | 2246         | 4        | GNPAT                  |
| 28 | 3447690        | 3449561        | 1872         | 3        | GNPAT                  |
| 28 | 3449561        | 3451366        | 1806         | 3        | C28H1orf131 GNPAT      |
| 28 | 3451366        | 3451750        | 385          | 3        | C28H1orf131            |
| 28 | 3451750        | 3452098        | 349          | 3        | C28H1orf131            |
| 28 | 3452098        | 3452716        | 619          | 3        | C28H1orf131            |
| 28 | 3452716        | 3454427        | 1712         | 3        | C28H1orf131            |
| 28 | 3454427        | 3456444        | 2018         | 3        | C28H1orf131            |
| 28 | 3456444        | 3471329        | 14886        | 3        | C28H1orf131            |
| 28 | 3471329        | 3472538        | 1210         | 3        | C28H1orf131            |
| 28 | 3472538        | 3475045        | 2508         | 3        | C28H1orf131            |
| 28 | 3475045        | 3483251        | 8207         | 3        | C28H1orf131            |
| 28 | 3483251        | 3483410        | 160          | 4        | .                      |
| 28 | 3483410        | 3488073        | 4664         | 3        | .                      |
| 28 | 3488073        | 3506774        | 18702        | 3        | TRIM67                 |
| 28 | 3506774        | 3507445        | 672          | 3        | TRIM67                 |
| 28 | 3507445        | 3507795        | 351          | 3        | TRIM67                 |
| 28 | 3507795        | 3513137        | 5343         | 3        | TRIM67                 |
| 28 | 3513137        | 3517090        | 3954         | 3        | TRIM67                 |
| 28 | 3517090        | 3522091        | 5002         | 3        | TRIM67                 |



|    |         |         |       |   |                         |
|----|---------|---------|-------|---|-------------------------|
| 28 | 3522091 | 3540964 | 18874 | 3 | TRIM67                  |
| 28 | 3540964 | 3541072 | 109   | 3 | TRIM67                  |
| 28 | 3541072 | 3542026 | 955   | 2 | TRIM67                  |
| 28 | 3542026 | 3542957 | 932   | 3 | TRIM67                  |
| 28 | 3542957 | 3564328 | 21372 | 3 | TRIM67                  |
| 28 | 3564328 | 3568864 | 4537  | 3 | .                       |
| 28 | 3568864 | 3569003 | 140   | 3 | .                       |
| 28 | 3569003 | 3571874 | 2872  | 3 | .                       |
| 28 | 3571874 | 3572233 | 360   | 3 | .                       |
| 28 | 3572233 | 3575788 | 3556  | 3 | .                       |
| 28 | 3575788 | 3576756 | 969   | 3 | .                       |
| 28 | 3576756 | 3578039 | 1284  | 3 | .                       |
| 28 | 3578039 | 3605534 | 27496 | 3 | .                       |
| 28 | 3605534 | 3617403 | 11870 | 3 | .                       |
| 28 | 3617403 | 3617500 | 98    | 3 | .                       |
| 28 | 3617500 | 3617975 | 476   | 3 | .                       |
| 28 | 3617975 | 3618348 | 374   | 4 | .                       |
| 28 | 3618348 | 3622374 | 4027  | 3 | .                       |
| 28 | 3622374 | 3631663 | 9290  | 3 | .                       |
| 28 | 3631663 | 3633196 | 1534  | 3 | .                       |
| 28 | 3633196 | 3645331 | 12136 | 3 | .                       |
| 28 | 3645331 | 3645480 | 150   | 3 | .                       |
| 28 | 3645480 | 3646717 | 1238  | 4 | .                       |
| 28 | 3646717 | 3648936 | 2220  | 3 | .                       |
| 28 | 3648936 | 3650581 | 1646  | 3 | .                       |
| 28 | 3650581 | 3669239 | 18659 | 3 | .                       |
| 28 | 3669239 | 3680191 | 10953 | 3 | .                       |
| 28 | 3680191 | 3689917 | 9727  | 3 | FAM89A                  |
| 28 | 3689917 | 3690075 | 159   | 3 | FAM89A                  |
| 28 | 3690075 | 3698760 | 8686  | 3 | FAM89A                  |
| 28 | 3698760 | 3705386 | 6627  | 3 | FAM89A                  |
| 28 | 3705386 | 3707911 | 2526  | 3 | FAM89A                  |
| 28 | 3707911 | 3708314 | 404   | 4 | .                       |
| 28 | 3708314 | 3708669 | 356   | 4 | LOC107131922            |
| 28 | 3708669 | 3709339 | 671   | 3 | LOC107131922            |
| 28 | 3709339 | 3709743 | 405   | 4 | LOC107131922            |
| 28 | 3709743 | 3746252 | 36510 | 3 | ARV1 LOC107131922 TTC13 |
| 28 | 3746252 | 3750644 | 4393  | 3 | TTC13                   |
| 28 | 3750644 | 3754836 | 4193  | 2 | TTC13                   |
| 28 | 3754836 | 3757019 | 2184  | 3 | TTC13                   |
| 28 | 3757019 | 3764244 | 7226  | 2 | TTC13                   |
| 28 | 3764244 | 3765933 | 1690  | 2 | TTC13                   |
| 28 | 3765933 | 3769178 | 3246  | 3 | TTC13                   |
| 28 | 3769178 | 3784859 | 15682 | 3 | TTC13                   |
| 28 | 3784859 | 3790507 | 5649  | 4 | TTC13                   |
| 28 | 3790507 | 3802623 | 12117 | 4 | TTC13                   |
| 28 | 3802623 | 3804299 | 1677  | 4 | TTC13                   |
| 28 | 3804299 | 3812973 | 8675  | 4 | TTC13                   |
| 28 | 3812973 | 3814240 | 1268  | 4 | TTC13                   |
| 28 | 3814240 | 3814667 | 428   | 4 | TTC13                   |
| 28 | 3814667 | 3814822 | 156   | 4 | TTC13                   |
| 28 | 3814822 | 3816819 | 1998  | 4 | TTC13                   |
| 28 | 3816819 | 3817223 | 405   | 3 | TTC13                   |
| 28 | 3817223 | 3817705 | 483   | 2 | TTC13                   |
| 28 | 3817705 | 3822506 | 4802  | 2 | TTC13                   |
| 28 | 3822506 | 3827442 | 4937  | 2 | TTC13                   |
| 28 | 3827442 | 3843491 | 16050 | 2 | .                       |
| 28 | 3843491 | 3854598 | 11108 | 2 | .                       |
| 28 | 3854598 | 3857184 | 2587  | 2 | .                       |
| 28 | 3857184 | 3858811 | 1628  | 2 | .                       |
| 28 | 3858811 | 3862542 | 3732  | 2 | .                       |
| 28 | 3862542 | 3884959 | 22418 | 2 | C28H1orf198             |
| 28 | 3884959 | 3889005 | 4047  | 2 | C28H1orf198             |
| 28 | 3889005 | 3891045 | 2041  | 2 | C28H1orf198             |
| 28 | 3891045 | 3891270 | 226   | 2 | C28H1orf198             |
| 28 | 3891270 | 3901794 | 10525 | 2 | C28H1orf198             |
| 28 | 3901794 | 3910090 | 8297  | 2 | .                       |
| 28 | 3910090 | 3913663 | 3574  | 3 | .                       |
| 28 | 3913663 | 3920337 | 6675  | 2 | .                       |
| 28 | 3920337 | 3922853 | 2517  | 2 | .                       |
| 28 | 3922853 | 3928864 | 6012  | 2 | .                       |
| 28 | 3928864 | 3950307 | 21444 | 2 | .                       |
| 28 | 3950307 | 3950994 | 688   | 2 | .                       |
| 28 | 3950994 | 3975866 | 24873 | 2 | .                       |
| 28 | 3975866 | 3976406 | 541   | 3 | .                       |
| 28 | 3976406 | 3985726 | 9321  | 2 | .                       |
| 28 | 3985726 | 4005747 | 20022 | 3 | .                       |
| 28 | 4005747 | 4006322 | 576   | 3 | .                       |
| 28 | 4006322 | 4007595 | 1274  | 3 | .                       |
| 28 | 4007595 | 4022028 | 14434 | 3 | .                       |
| 28 | 4022028 | 4023219 | 1192  | 4 | .                       |
| 28 | 4023219 | 4029351 | 6133  | 3 | .                       |
| 28 | 4029351 | 4041472 | 12122 | 3 | .                       |
| 28 | 4041472 | 4041859 | 388   | 3 | .                       |
| 28 | 4041859 | 4052936 | 11078 | 3 | .                       |
| 28 | 4052936 | 4054964 | 2029  | 3 | .                       |
| 28 | 4054964 | 4060783 | 5820  | 3 | .                       |
| 28 | 4060783 | 4061273 | 491   | 3 | .                       |
| 28 | 4061273 | 4088179 | 26907 | 3 | .                       |
| 28 | 4088179 | 4090663 | 2485  | 3 | .                       |
| 28 | 4090663 | 4096674 | 6012  | 3 | .                       |

|    |         |         |       |   |              |
|----|---------|---------|-------|---|--------------|
| 28 | 4096674 | 4116434 | 19761 | 3 | .            |
| 28 | 4116434 | 4126042 | 9609  | 3 | .            |
| 28 | 4126042 | 4128720 | 2679  | 3 | .            |
| 28 | 4128720 | 4151700 | 22981 | 4 | .            |
| 28 | 4151700 | 4151926 | 227   | 4 | .            |
| 28 | 4151926 | 4152670 | 745   | 4 | .            |
| 28 | 4152670 | 4156312 | 3643  | 3 | .            |
| 28 | 4156312 | 4157904 | 1593  | 3 | FMN2         |
| 28 | 4157904 | 4169893 | 11990 | 3 | FMN2         |
| 28 | 4169893 | 4170760 | 868   | 3 | FMN2         |
| 28 | 4170760 | 4172753 | 1994  | 3 | FMN2         |
| 28 | 4172753 | 4173014 | 262   | 2 | FMN2         |
| 28 | 4173014 | 4173463 | 450   | 2 | FMN2         |
| 28 | 4173463 | 4194229 | 20767 | 2 | FMN2         |
| 28 | 4194229 | 4203784 | 9556  | 2 | FMN2         |
| 28 | 4203784 | 4241223 | 37440 | 2 | FMN2         |
| 28 | 4241223 | 4241594 | 372   | 3 | FMN2         |
| 28 | 4241594 | 4244208 | 2615  | 3 | FMN2         |
| 28 | 4244208 | 4255498 | 11291 | 2 | FMN2         |
| 28 | 4255498 | 4258047 | 2550  | 2 | FMN2         |
| 28 | 4258047 | 4268219 | 10173 | 2 | FMN2         |
| 28 | 4268219 | 4270099 | 1881  | 2 | FMN2         |
| 28 | 4270296 | 4285856 | 15561 | 2 | FMN2         |
| 28 | 4285856 | 4287256 | 1401  | 2 | FMN2         |
| 28 | 4287256 | 4296180 | 8925  | 2 | FMN2         |
| 28 | 4296180 | 4296605 | 426   | 2 | FMN2         |
| 28 | 4296605 | 4299326 | 2722  | 2 | FMN2         |
| 28 | 4301334 | 4306659 | 5326  | 2 | FMN2         |
| 28 | 4306659 | 4307607 | 949   | 2 | FMN2         |
| 28 | 4307607 | 4311565 | 3959  | 3 | FMN2         |
| 28 | 4311565 | 4324935 | 13371 | 3 | FMN2         |
| 28 | 4324935 | 4339152 | 14218 | 3 | FMN2         |
| 28 | 4339152 | 4351342 | 12191 | 3 | FMN2         |
| 28 | 4351342 | 4352017 | 676   | 4 | FMN2         |
| 28 | 4352017 | 4357503 | 5487  | 3 | FMN2         |
| 28 | 4357503 | 4358539 | 1037  | 3 | FMN2         |
| 28 | 4358539 | 4365204 | 6666  | 3 | FMN2         |
| 28 | 4365204 | 4365821 | 618   | 4 | FMN2         |
| 28 | 4365821 | 4386356 | 20536 | 3 | FMN2         |
| 28 | 4386356 | 4401263 | 14908 | 3 | FMN2         |
| 28 | 4401263 | 4408757 | 7495  | 3 | FMN2         |
| 28 | 4408757 | 4412999 | 4243  | 3 | FMN2         |
| 28 | 4412999 | 4419658 | 6660  | 3 | FMN2         |
| 28 | 4419658 | 4420476 | 819   | 3 | FMN2         |
| 28 | 4420476 | 4420857 | 382   | 3 | FMN2         |
| 28 | 4420857 | 4421202 | 346   | 4 | FMN2         |
| 28 | 4421202 | 4423815 | 2614  | 3 | FMN2         |
| 28 | 4423815 | 4424094 | 280   | 3 | FMN2         |
| 28 | 4424094 | 4426079 | 1986  | 3 | FMN2         |
| 28 | 4426079 | 4427204 | 1126  | 4 | FMN2         |
| 28 | 4427204 | 4433899 | 6696  | 3 | FMN2         |
| 28 | 4433899 | 4433976 | 78    | 4 | FMN2         |
| 28 | 4433976 | 4439190 | 5215  | 3 | FMN2         |
| 28 | 4439190 | 4454614 | 15425 | 3 | FMN2         |
| 28 | 4454614 | 4456505 | 1892  | 3 | FMN2         |
| 28 | 4456505 | 4457002 | 498   | 5 | FMN2         |
| 28 | 4457002 | 4466284 | 9283  | 4 | FMN2         |
| 28 | 4466284 | 4469840 | 3557  | 4 | FMN2         |
| 28 | 4469840 | 4470369 | 530   | 4 | FMN2         |
| 28 | 4470369 | 4474396 | 4028  | 4 | FMN2         |
| 28 | 4474396 | 4476571 | 2176  | 4 | FMN2         |
| 28 | 4476571 | 4487736 | 11166 | 4 | FMN2         |
| 28 | 4487736 | 4494525 | 6790  | 3 | FMN2         |
| 28 | 4494525 | 4494771 | 247   | 2 | FMN2         |
| 28 | 4494771 | 4509976 | 15206 | 3 | FMN2         |
| 28 | 4509976 | 4512831 | 2856  | 3 | FMN2         |
| 28 | 4512831 | 4516088 | 3258  | 3 | FMN2         |
| 28 | 4516088 | 4536045 | 19958 | 3 | FMN2         |
| 28 | 4536045 | 4563816 | 27772 | 3 | .            |
| 28 | 4563816 | 4574331 | 10516 | 3 | .            |
| 28 | 4574331 | 4580269 | 5939  | 3 | .            |
| 28 | 4580269 | 4616972 | 36704 | 3 | LOC100337323 |
| 28 | 4616972 | 4626800 | 9829  | 2 | DISC1        |
| 28 | 4626800 | 4648998 | 22199 | 2 | DISC1        |
| 28 | 4648998 | 4649297 | 300   | 2 | DISC1        |
| 28 | 4649297 | 4651006 | 1710  | 2 | DISC1        |
| 28 | 4651006 | 4660523 | 9518  | 2 | DISC1        |
| 28 | 4660523 | 4663972 | 3450  | 2 | DISC1        |
| 28 | 4663972 | 4667098 | 3127  | 2 | DISC1        |
| 28 | 4667098 | 4668531 | 1434  | 2 | DISC1        |
| 28 | 4668531 | 4675762 | 7232  | 2 | DISC1        |
| 28 | 4675762 | 4676351 | 590   | 2 | DISC1        |
| 28 | 4676351 | 4677476 | 1126  | 2 | DISC1        |
| 28 | 4677476 | 4681658 | 4183  | 2 | DISC1        |
| 28 | 4681658 | 4683552 | 1895  | 2 | DISC1        |
| 28 | 4683552 | 4689248 | 5697  | 2 | DISC1        |
| 28 | 4689248 | 4691552 | 2305  | 2 | DISC1        |
| 28 | 4691552 | 4703355 | 11804 | 2 | DISC1        |
| 28 | 4704552 | 4738167 | 33616 | 2 | DISC1        |
| 28 | 4738167 | 4738458 | 292   | 3 | DISC1        |
| 28 | 4738458 | 4740775 | 2318  | 2 | DISC1        |

|    |         |         |       |   |                       |
|----|---------|---------|-------|---|-----------------------|
| 28 | 4740775 | 4741261 | 487   | 2 | DISC1                 |
| 28 | 4741261 | 4748996 | 7736  | 2 | DISC1                 |
| 28 | 4748996 | 4749440 | 445   | 2 | DISC1                 |
| 28 | 4749440 | 4754665 | 5226  | 2 | DISC1                 |
| 28 | 4754665 | 4768667 | 14003 | 2 | DISC1                 |
| 28 | 4768667 | 4772139 | 3473  | 2 | DISC1                 |
| 28 | 4772139 | 4774677 | 2539  | 2 | DISC1                 |
| 28 | 5480087 | 5482115 | 2029  | 2 | .                     |
| 28 | 5482115 | 5482327 | 213   | 2 | .                     |
| 28 | 5482327 | 5497325 | 14999 | 2 | .                     |
| 28 | 5497325 | 5524794 | 27470 | 2 | .                     |
| 28 | 5524794 | 5531204 | 6411  | 2 | .                     |
| 28 | 5531204 | 5532055 | 852   | 2 | .                     |
| 28 | 5532055 | 5532652 | 598   | 3 | .                     |
| 28 | 5532652 | 5533886 | 1235  | 2 | .                     |
| 28 | 5533886 | 5540798 | 6913  | 2 | .                     |
| 28 | 5540798 | 5564691 | 23894 | 2 | .                     |
| 28 | 5564691 | 5576562 | 11872 | 2 | .                     |
| 28 | 5576562 | 5593636 | 17075 | 2 | .                     |
| 28 | 5593636 | 5594737 | 1102  | 2 | .                     |
| 28 | 5594737 | 5620008 | 25272 | 2 | .                     |
| 28 | 5620008 | 5623545 | 3538  | 2 | .                     |
| 28 | 5623545 | 5623801 | 257   | 2 | .                     |
| 28 | 5623801 | 5624986 | 1186  | 2 | .                     |
| 28 | 5624986 | 5629935 | 4950  | 2 | .                     |
| 28 | 5629935 | 5657815 | 27881 | 2 | .                     |
| 28 | 5657815 | 5667995 | 10181 | 2 | .                     |
| 28 | 5667995 | 5672029 | 4035  | 2 | .                     |
| 28 | 5672029 | 5678419 | 6391  | 2 | .                     |
| 28 | 5678419 | 5683574 | 5156  | 2 | .                     |
| 28 | 5683574 | 5685604 | 2031  | 2 | .                     |
| 28 | 5687766 | 5699304 | 11539 | 2 | .                     |
| 28 | 5699304 | 5701387 | 2084  | 2 | .                     |
| 28 | 5701387 | 5708457 | 7071  | 2 | .                     |
| 28 | 5708457 | 5709061 | 605   | 2 | .                     |
| 28 | 5709061 | 5709967 | 907   | 3 | .                     |
| 28 | 5709967 | 5710338 | 372   | 3 | .                     |
| 28 | 5710338 | 5710547 | 210   | 2 | .                     |
| 28 | 5710547 | 5711624 | 1078  | 2 | .                     |
| 28 | 5711624 | 5713545 | 1922  | 2 | .                     |
| 28 | 5713545 | 5720252 | 6708  | 2 | .                     |
| 28 | 5720252 | 5736478 | 16227 | 2 | .                     |
| 28 | 5736478 | 5749354 | 12877 | 2 | .                     |
| 28 | 5749354 | 5753647 | 4294  | 2 | MAP10                 |
| 28 | 5753647 | 5755295 | 1649  | 2 | .                     |
| 28 | 5755456 | 5759674 | 4219  | 2 | .                     |
| 28 | 5759674 | 5762319 | 2646  | 2 | .                     |
| 28 | 5762319 | 5762692 | 374   | 2 | .                     |
| 28 | 5762692 | 5772730 | 10039 | 2 | .                     |
| 28 | 5772730 | 5778751 | 6022  | 2 | .                     |
| 28 | 5778751 | 5788215 | 9465  | 2 | .                     |
| 28 | 5788215 | 5808600 | 20386 | 2 | .                     |
| 28 | 5808600 | 5831092 | 22493 | 2 | .                     |
| 28 | 5831092 | 5835242 | 4151  | 2 | .                     |
| 28 | 5835242 | 5844298 | 9057  | 2 | .                     |
| 28 | 5844298 | 5853794 | 9497  | 2 | .                     |
| 28 | 5853794 | 5856411 | 2618  | 2 | .                     |
| 28 | 5856411 | 5858568 | 2158  | 2 | .                     |
| 28 | 5858568 | 5886226 | 27659 | 2 | .                     |
| 28 | 5886226 | 5886667 | 442   | 2 | .                     |
| 28 | 5886667 | 5888224 | 1558  | 2 | .                     |
| 28 | 5888224 | 5907562 | 19339 | 2 | .                     |
| 28 | 5907562 | 5914024 | 6463  | 2 | NTPCR                 |
| 28 | 5914024 | 5915786 | 1763  | 2 | NTPCR                 |
| 28 | 5915786 | 5918192 | 2407  | 2 | NTPCR                 |
| 28 | 5918192 | 5918391 | 200   | 2 | NTPCR                 |
| 28 | 5918391 | 5955491 | 37101 | 2 | NTPCR PCNX2 TRNAC-GCA |
| 28 | 5955491 | 5955732 | 242   | 2 | PCNX2                 |
| 28 | 5955732 | 5964025 | 8294  | 2 | PCNX2                 |
| 28 | 5964025 | 5973204 | 9180  | 2 | PCNX2                 |
| 28 | 5973832 | 5976470 | 2639  | 2 | PCNX2                 |
| 28 | 5976470 | 5978681 | 2212  | 3 | PCNX2                 |
| 28 | 5978681 | 5979072 | 392   | 3 | PCNX2                 |
| 28 | 5979072 | 5983960 | 4889  | 3 | PCNX2                 |
| 28 | 5983960 | 5995294 | 11335 | 3 | PCNX2                 |
| 28 | 5995294 | 5996131 | 838   | 2 | PCNX2                 |
| 28 | 5996131 | 5999866 | 3736  | 2 | PCNX2                 |
| 28 | 5999866 | 6004227 | 4362  | 2 | PCNX2                 |
| 28 | 6004227 | 6009080 | 4854  | 2 | PCNX2                 |
| 28 | 6009080 | 6009701 | 622   | 2 | PCNX2                 |
| 28 | 6009701 | 6016858 | 7158  | 2 | PCNX2                 |
| 28 | 6016858 | 6036645 | 19788 | 2 | PCNX2                 |
| 28 | 6036645 | 6044378 | 7734  | 2 | PCNX2                 |
| 28 | 6044378 | 6045939 | 1562  | 2 | PCNX2                 |
| 28 | 6045939 | 6046559 | 621   | 2 | PCNX2                 |
| 28 | 6046559 | 6055505 | 8947  | 2 | PCNX2                 |
| 28 | 6055505 | 6067559 | 12055 | 2 | PCNX2                 |
| 28 | 6067559 | 6068936 | 1378  | 2 | PCNX2                 |
| 28 | 6068936 | 6069234 | 299   | 3 | PCNX2                 |
| 28 | 6069234 | 6071463 | 2230  | 2 | PCNX2                 |
| 28 | 6071463 | 6078463 | 7001  | 2 | PCNX2                 |

|    |         |         |       |   |              |
|----|---------|---------|-------|---|--------------|
| 28 | 6078463 | 6108443 | 29981 | 2 | PCNX2        |
| 28 | 9233322 | 9235976 | 2655  | 2 | EDARADD      |
| 28 | 9235976 | 9250616 | 14641 | 2 | EDARADD      |
| 28 | 9250616 | 9250881 | 266   | 3 | EDARADD      |
| 28 | 9250881 | 9262931 | 12051 | 2 | EDARADD      |
| 28 | 9262931 | 9268095 | 5165  | 3 | LGALS8       |
| 28 | 9268095 | 9273343 | 5249  | 2 | LGALS8       |
| 28 | 9273343 | 9276417 | 3075  | 2 | LGALS8       |
| 28 | 9276417 | 9285671 | 9255  | 2 | LGALS8       |
| 28 | 9285671 | 9291834 | 6164  | 2 | LGALS8       |
| 28 | 9291834 | 9294719 | 2886  | 2 | LGALS8       |
| 28 | 9294719 | 9298101 | 3383  | 2 | LGALS8       |
| 28 | 9298101 | 9312768 | 14668 | 2 | .            |
| 28 | 9312768 | 9324042 | 11275 | 2 | .            |
| 28 | 9324042 | 9350899 | 26858 | 2 | HEATR1       |
| 28 | 9350899 | 9358967 | 8069  | 2 | .            |
| 28 | 9358967 | 9359850 | 884   | 2 | .            |
| 28 | 9359850 | 9363656 | 3807  | 3 | .            |
| 28 | 9363656 | 9363795 | 140   | 3 | .            |
| 28 | 9363795 | 9365121 | 1327  | 3 | .            |
| 28 | 9365121 | 9365360 | 240   | 3 | .            |
| 28 | 9365360 | 9368135 | 2776  | 3 | .            |
| 28 | 9368135 | 9373176 | 5042  | 3 | .            |
| 28 | 9373176 | 9373962 | 787   | 3 | .            |
| 28 | 9373962 | 9375706 | 1745  | 3 | .            |
| 28 | 9375706 | 9376688 | 983   | 3 | .            |
| 28 | 9376688 | 9376979 | 292   | 3 | .            |
| 28 | 9376979 | 9378114 | 1136  | 3 | .            |
| 28 | 9378114 | 9378280 | 167   | 3 | .            |
| 28 | 9378280 | 9387946 | 9667  | 3 | LOC101908221 |
| 28 | 9387946 | 9389015 | 1070  | 3 | LOC101908221 |
| 28 | 9389015 | 9390456 | 1442  | 2 | LOC101908221 |
| 28 | 9390456 | 9395350 | 4895  | 2 | .            |
| 28 | 9395350 | 9395612 | 263   | 2 | .            |
| 28 | 9395612 | 9397610 | 1999  | 2 | .            |
| 28 | 9397610 | 9422889 | 25280 | 2 | .            |
| 28 | 9422889 | 9430845 | 7957  | 2 | .            |
| 28 | 9430845 | 9431246 | 402   | 2 | .            |
| 28 | 9431246 | 9434482 | 3237  | 2 | .            |
| 28 | 9434482 | 9442772 | 8291  | 2 | .            |
| 28 | 9442772 | 9444620 | 1849  | 2 | .            |
| 28 | 9444620 | 9457768 | 13149 | 2 | .            |
| 28 | 9457768 | 9468818 | 11051 | 2 | ACTN2        |
| 28 | 9468818 | 9468946 | 129   | 3 | ACTN2        |
| 28 | 9468946 | 9469111 | 166   | 3 | ACTN2        |
| 28 | 9469111 | 9477275 | 8165  | 2 | ACTN2        |
| 28 | 9477275 | 9480495 | 3221  | 2 | ACTN2        |
| 28 | 9480495 | 9481476 | 982   | 2 | ACTN2        |
| 28 | 9481476 | 9482192 | 717   | 2 | ACTN2        |
| 28 | 9482192 | 9483441 | 1250  | 2 | ACTN2        |
| 28 | 9483441 | 9484903 | 1463  | 2 | ACTN2        |
| 28 | 9484903 | 9489469 | 4567  | 2 | ACTN2        |
| 28 | 9489469 | 9500962 | 11494 | 2 | ACTN2        |
| 28 | 9500962 | 9504481 | 3520  | 2 | ACTN2        |
| 28 | 9504481 | 9515440 | 10960 | 2 | ACTN2        |
| 28 | 9515440 | 9516423 | 984   | 3 | .            |
| 28 | 9516423 | 9516680 | 258   | 2 | .            |
| 28 | 9516680 | 9522271 | 5592  | 2 | .            |
| 28 | 9522271 | 9529288 | 7018  | 2 | MTR          |
| 28 | 9529288 | 9558498 | 28775 | 2 | MTR          |
| 28 | 9558498 | 9559772 | 1275  | 2 | MTR          |
| 28 | 9559772 | 9582074 | 22303 | 2 | MTR          |
| 28 | 9582074 | 9604558 | 19472 | 2 | MTR          |
| 28 | 9604558 | 9611609 | 2856  | 2 | MTR          |
| 28 | 9611609 | 9626097 | 14489 | 2 | MTR          |
| 28 | 9626097 | 9626729 | 633   | 2 | MTR          |
| 28 | 9626729 | 9630171 | 3443  | 2 | MTR          |
| 28 | 9630171 | 9664869 | 34699 | 2 | MTR          |
| 28 | 9664869 | 9670635 | 5767  | 2 | .            |
| 28 | 9670635 | 9671246 | 612   | 2 | .            |
| 28 | 9671246 | 9675039 | 3794  | 2 | .            |
| 28 | 9675039 | 9676485 | 1447  | 2 | .            |
| 28 | 9676485 | 9676877 | 393   | 2 | .            |
| 28 | 9676877 | 9677626 | 750   | 2 | .            |
| 28 | 9677626 | 9682107 | 4482  | 2 | .            |
| 28 | 9682107 | 9683193 | 1087  | 3 | .            |
| 28 | 9683193 | 9690335 | 7143  | 2 | .            |
| 28 | 9690335 | 9705360 | 15026 | 2 | .            |
| 28 | 9705360 | 9707213 | 1854  | 2 | .            |
| 28 | 9707213 | 9712930 | 4172  | 2 | .            |
| 28 | 9712930 | 9717122 | 4193  | 2 | .            |
| 28 | 9717122 | 9717466 | 345   | 2 | .            |
| 28 | 9717466 | 9719373 | 1908  | 2 | .            |
| 28 | 9719373 | 9738149 | 18777 | 2 | .            |
| 28 | 9738149 | 9738824 | 676   | 3 | .            |
| 28 | 9738824 | 9746381 | 7558  | 2 | .            |
| 28 | 9746381 | 9760884 | 14504 | 2 | .            |
| 28 | 9760884 | 9782761 | 21878 | 3 | .            |
| 28 | 9782761 | 9788521 | 5761  | 3 | .            |
| 28 | 9788521 | 9796498 | 7978  | 2 | .            |
| 28 | 9796498 | 9800098 | 3601  | 2 | .            |

|    |          |          |       |   |           |
|----|----------|----------|-------|---|-----------|
| 28 | 10354990 | 10358433 | 3444  | 2 | RYR2      |
| 28 | 10358433 | 10364707 | 6275  | 2 | RYR2      |
| 28 | 10364707 | 10365083 | 377   | 2 | RYR2      |
| 28 | 10365083 | 10375564 | 10482 | 2 | RYR2      |
| 28 | 10375564 | 10376188 | 625   | 2 | RYR2      |
| 28 | 10376188 | 10376376 | 189   | 2 | RYR2      |
| 28 | 10418805 | 10418924 | 120   | 2 | RYR2      |
| 28 | 10418924 | 10425004 | 6081  | 2 | RYR2      |
| 28 | 10425004 | 10426026 | 1023  | 2 | RYR2      |
| 28 | 10426026 | 10435536 | 9511  | 2 | RYR2      |
| 28 | 10504537 | 10510491 | 5955  | 2 | RYR2      |
| 28 | 10510491 | 10512284 | 1794  | 2 | RYR2      |
| 28 | 10512284 | 10521925 | 9642  | 2 | RYR2      |
| 28 | 10521925 | 10527910 | 5986  | 2 | RYR2      |
| 28 | 10527910 | 10530050 | 2141  | 2 | RYR2      |
| 28 | 10530050 | 10530421 | 372   | 3 | RYR2      |
| 28 | 10530421 | 10536290 | 5870  | 2 | RYR2      |
| 28 | 10536290 | 10553326 | 17037 | 2 | RYR2      |
| 28 | 10553326 | 10560747 | 7422  | 2 | RYR2      |
| 28 | 10560747 | 10569767 | 9021  | 2 | RYR2      |
| 28 | 10657252 | 10657923 | 672   | 2 | .         |
| 28 | 10698760 | 10699191 | 432   | 2 | .         |
| 28 | 10796698 | 10799585 | 2888  | 2 | .         |
| 28 | 11987844 | 11989800 | 1957  | 2 | .         |
| 28 | 12266638 | 12280583 | 13946 | 2 | .         |
| 28 | 12280583 | 12308996 | 28414 | 2 | .         |
| 28 | 12308996 | 12310492 | 1497  | 2 | .         |
| 28 | 12310492 | 12311321 | 830   | 2 | .         |
| 28 | 12311321 | 12313675 | 2355  | 2 | .         |
| 28 | 12313675 | 12314414 | 740   | 2 | .         |
| 28 | 12314414 | 12321187 | 6774  | 2 | .         |
| 28 | 12321187 | 12325246 | 4060  | 2 | .         |
| 28 | 12325246 | 12326438 | 1193  | 2 | .         |
| 28 | 12326438 | 12331873 | 5436  | 2 | .         |
| 28 | 12331873 | 12339041 | 7169  | 2 | .         |
| 28 | 12339041 | 12352631 | 13591 | 2 | .         |
| 28 | 12352631 | 12354624 | 1994  | 2 | .         |
| 28 | 12354624 | 12355356 | 733   | 2 | .         |
| 28 | 12355356 | 12356530 | 1175  | 2 | .         |
| 28 | 12356530 | 12359746 | 3217  | 2 | .         |
| 28 | 12359746 | 12371872 | 12127 | 2 | .         |
| 28 | 12371872 | 12387344 | 15473 | 2 | .         |
| 28 | 12387344 | 12387632 | 289   | 2 | .         |
| 28 | 12387632 | 12388421 | 790   | 2 | .         |
| 28 | 12388421 | 12391167 | 2747  | 2 | .         |
| 28 | 12391167 | 12392654 | 1488  | 2 | .         |
| 28 | 12392654 | 12393419 | 766   | 2 | .         |
| 28 | 12393419 | 12394462 | 1044  | 2 | .         |
| 28 | 12394462 | 12395544 | 1083  | 2 | .         |
| 28 | 12395544 | 12405255 | 9712  | 2 | .         |
| 28 | 12405255 | 12422753 | 17499 | 2 | TRNAR-ACG |
| 28 | 12422753 | 12449622 | 26870 | 2 | .         |
| 28 | 12449622 | 12454491 | 4870  | 2 | .         |
| 28 | 12454491 | 12456420 | 1930  | 2 | .         |
| 28 | 12456420 | 12457569 | 1150  | 2 | .         |
| 28 | 12457569 | 12461480 | 3912  | 2 | .         |
| 28 | 12461480 | 12462448 | 969   | 2 | .         |
| 28 | 12462448 | 12463889 | 1442  | 2 | .         |
| 28 | 12463889 | 12464157 | 269   | 2 | .         |
| 28 | 12464157 | 12466198 | 2042  | 2 | .         |
| 28 | 12466198 | 12467516 | 1319  | 2 | .         |
| 28 | 12467516 | 12477395 | 9880  | 2 | .         |
| 28 | 12477395 | 12481089 | 3695  | 2 | .         |
| 28 | 12481089 | 12483431 | 2343  | 2 | .         |
| 28 | 12483431 | 12490964 | 7534  | 2 | .         |
| 28 | 12490964 | 12495866 | 4903  | 2 | .         |
| 28 | 12495866 | 12521184 | 25319 | 2 | .         |
| 28 | 12521184 | 12529016 | 7833  | 2 | .         |
| 28 | 12529016 | 12533179 | 4164  | 2 | .         |
| 28 | 12533179 | 12559647 | 26469 | 2 | .         |
| 28 | 12559647 | 12581492 | 21846 | 2 | CHRM3     |
| 28 | 12581492 | 12585198 | 3707  | 2 | CHRM3     |
| 28 | 12585198 | 12588281 | 3084  | 2 | CHRM3     |
| 28 | 12588281 | 12593512 | 5232  | 2 | CHRM3     |
| 28 | 12593512 | 12596470 | 2959  | 2 | CHRM3     |
| 28 | 12596470 | 12599435 | 2966  | 2 | CHRM3     |
| 28 | 12599435 | 12604624 | 5190  | 2 | CHRM3     |
| 28 | 12604624 | 12621534 | 16911 | 2 | CHRM3     |
| 28 | 12621534 | 12631323 | 9790  | 2 | CHRM3     |
| 28 | 12631323 | 12635363 | 4041  | 2 | CHRM3     |
| 28 | 12635363 | 12641018 | 5656  | 2 | CHRM3     |
| 28 | 12641018 | 12646239 | 5222  | 2 | CHRM3     |
| 28 | 12646239 | 12646545 | 307   | 2 | CHRM3     |
| 28 | 12646545 | 12647533 | 989   | 2 | CHRM3     |
| 28 | 12647533 | 12649852 | 2320  | 2 | CHRM3     |
| 28 | 12649852 | 12667847 | 17996 | 2 | CHRM3     |
| 28 | 12667847 | 12671885 | 4039  | 2 | CHRM3     |
| 28 | 12671885 | 12672990 | 1106  | 2 | CHRM3     |
| 28 | 12672990 | 12674590 | 1601  | 2 | CHRM3     |
| 28 | 12674590 | 12676320 | 1731  | 2 | CHRM3     |
| 28 | 12676320 | 12688222 | 11903 | 2 | CHRM3     |

|    |          |          |       |   |                                  |
|----|----------|----------|-------|---|----------------------------------|
| 28 | 12688222 | 12691370 | 3149  | 2 | CHRM3                            |
| 28 | 12691370 | 12693655 | 2286  | 2 | CHRM3                            |
| 28 | 12693655 | 12699531 | 5877  | 2 | CHRM3                            |
| 28 | 12699531 | 12703660 | 4130  | 2 | CHRM3                            |
| 28 | 12703660 | 12708595 | 4936  | 2 | CHRM3                            |
| 28 | 12708595 | 12709056 | 462   | 2 | CHRM3                            |
| 28 | 12709056 | 12709982 | 927   | 2 | CHRM3                            |
| 28 | 12709982 | 12718929 | 8948  | 2 | CHRM3                            |
| 28 | 12718929 | 12727305 | 8377  | 2 | CHRM3                            |
| 28 | 12727305 | 12728004 | 700   | 2 | CHRM3                            |
| 28 | 12728004 | 12730445 | 2442  | 2 | CHRM3                            |
| 28 | 12730445 | 12732439 | 1995  | 2 | CHRM3                            |
| 28 | 12732439 | 12736778 | 4340  | 2 | CHRM3                            |
| 28 | 12736778 | 12739927 | 3150  | 2 | CHRM3                            |
| 28 | 12739927 | 12741118 | 1192  | 2 | CHRM3                            |
| 28 | 12741118 | 12744717 | 3600  | 2 | CHRM3                            |
| 28 | 12744717 | 12746198 | 1482  | 2 | CHRM3                            |
| 28 | 12746198 | 12749102 | 2905  | 2 | CHRM3                            |
| 28 | 12749102 | 12749778 | 677   | 2 | CHRM3                            |
| 28 | 12749778 | 12752235 | 2458  | 2 | CHRM3                            |
| 28 | 12752235 | 12768799 | 16565 | 2 | CHRM3                            |
| 28 | 12768799 | 12769059 | 261   | 2 | CHRM3                            |
| 28 | 12769059 | 12785624 | 16566 | 2 | CHRM3                            |
| 28 | 12785624 | 12789310 | 3687  | 2 | CHRM3                            |
| 28 | 12789310 | 12792377 | 3068  | 2 | CHRM3                            |
| 28 | 12792377 | 12793729 | 1353  | 2 | CHRM3                            |
| 28 | 12793729 | 12798717 | 4989  | 2 | CHRM3                            |
| 28 | 12798717 | 12799136 | 420   | 2 | CHRM3                            |
| 28 | 12799136 | 12816680 | 17545 | 2 | CHRM3                            |
| 28 | 12816680 | 12820024 | 3345  | 2 | CHRM3                            |
| 28 | 12820024 | 12829544 | 9521  | 2 | CHRM3                            |
| 28 | 12829544 | 12833842 | 4299  | 2 | CHRM3                            |
| 28 | 12833842 | 12835667 | 1826  | 2 | CHRM3                            |
| 28 | 12835667 | 12838125 | 2459  | 2 | CHRM3                            |
| 28 | 12838125 | 12848908 | 10784 | 2 | CHRM3                            |
| 28 | 12848908 | 12860029 | 11122 | 2 | CHRM3                            |
| 28 | 12860029 | 12871554 | 11526 | 2 | CHRM3                            |
| 28 | 12871554 | 12876542 | 4989  | 2 | CHRM3                            |
| 28 | 12876542 | 12878429 | 1888  | 2 | CHRM3                            |
| 28 | 12878429 | 12881059 | 2631  | 2 | .                                |
| 28 | 12881059 | 12882969 | 1911  | 2 | .                                |
| 28 | 13189439 | 13190149 | 711   | 2 | LOC101905074                     |
| 28 | 13190149 | 13190926 | 778   | 2 | LOC101905074                     |
| 28 | 13190926 | 13195054 | 4129  | 2 | LOC101905074                     |
| 28 | 13195054 | 13205785 | 10732 | 2 | LOC101905074                     |
| 28 | 13205785 | 13215498 | 9714  | 2 | LOC101905074                     |
| 28 | 13215498 | 13215883 | 386   | 2 | .                                |
| 28 | 13494813 | 13496349 | 1537  | 2 | .                                |
| 28 | 13496349 | 13505328 | 8980  | 2 | .                                |
| 28 | 13505328 | 13515255 | 9928  | 2 | .                                |
| 28 | 13515255 | 13515806 | 552   | 2 | .                                |
| 28 | 13515806 | 13516480 | 675   | 2 | .                                |
| 28 | 13516480 | 13517464 | 985   | 2 | .                                |
| 28 | 13566275 | 13567098 | 824   | 2 | .                                |
| 28 | 13645010 | 13645211 | 202   | 2 | RET                              |
| 28 | 13645211 | 13646096 | 886   | 2 | RET                              |
| 28 | 13646096 | 13646799 | 704   | 2 | RET                              |
| 28 | 13646799 | 13649466 | 2668  | 2 | RET                              |
| 28 | 13649466 | 13654872 | 5407  | 2 | RET                              |
| 28 | 13654872 | 13657516 | 2645  | 2 | RET                              |
| 28 | 13657516 | 13669967 | 12452 | 2 | RET                              |
| 28 | 13669967 | 13671635 | 1669  | 2 | RET                              |
| 28 | 13671635 | 13672202 | 568   | 2 | RET                              |
| 28 | 13672202 | 13674989 | 2788  | 2 | RET                              |
| 28 | 13674989 | 13685708 | 10720 | 2 | RET                              |
| 28 | 13685708 | 13695069 | 9362  | 2 | .                                |
| 28 | 13695069 | 13699454 | 4386  | 2 | .                                |
| 28 | 13699454 | 13711625 | 12172 | 2 | .                                |
| 28 | 13711625 | 13760143 | 48519 | 2 | CSGALNACT2 LOC104970943 RASGEF1A |
| 28 | 13760143 | 13764629 | 4487  | 2 | RASGEF1A                         |
| 28 | 13764629 | 13765669 | 1041  | 2 | .                                |
| 28 | 13765669 | 13766680 | 1012  | 2 | .                                |
| 28 | 13766680 | 13767555 | 876   | 2 | .                                |
| 28 | 13767555 | 13768225 | 671   | 2 | .                                |
| 28 | 13768225 | 13768983 | 759   | 2 | .                                |
| 28 | 13768983 | 13769638 | 656   | 3 | .                                |
| 28 | 13769638 | 13770234 | 597   | 2 | .                                |
| 28 | 13770234 | 13771706 | 1473  | 3 | .                                |
| 28 | 13771706 | 13776563 | 4858  | 2 | .                                |
| 28 | 13776563 | 13783698 | 7136  | 2 | .                                |
| 28 | 14667813 | 14669162 | 1350  | 2 | .                                |
| 28 | 14669162 | 14690783 | 21622 | 2 | .                                |
| 28 | 14690783 | 14708913 | 18131 | 2 | .                                |
| 28 | 14708913 | 14747323 | 38411 | 2 | .                                |
| 28 | 14772974 | 14775722 | 2749  | 2 | .                                |
| 28 | 15110141 | 15110564 | 424   | 2 | FAM13C                           |
| 28 | 15144921 | 15161067 | 16147 | 2 | FAM13C                           |
| 28 | 15161067 | 15161180 | 114   | 2 | FAM13C                           |
| 28 | 15161180 | 15164226 | 3047  | 2 | FAM13C                           |
| 28 | 15164226 | 15166398 | 2173  | 2 | FAM13C                           |
| 28 | 16427365 | 16432299 | 4935  | 2 | LOC100337251                     |

|    |          |          |       |   |                        |
|----|----------|----------|-------|---|------------------------|
| 28 | 16432299 | 16434281 | 1983  | 2 | LOC100337251           |
| 28 | 16434281 | 16438913 | 4633  | 2 | LOC100337251 TRNAG-UCC |
| 28 | 16438913 | 16450701 | 11789 | 2 | LOC100337251           |
| 28 | 16450701 | 16451854 | 1154  | 2 | LOC100337251           |
| 28 | 16451854 | 16457743 | 5890  | 2 | LOC100337251           |
| 28 | 16457743 | 16461785 | 4043  | 2 | LOC100337251           |
| 28 | 16461785 | 16473344 | 11560 | 2 | LOC100337251           |
| 28 | 16473344 | 16473740 | 397   | 2 | LOC100337251           |
| 28 | 16473740 | 16485016 | 11277 | 2 | LOC100337251           |
| 28 | 16485016 | 16485192 | 177   | 2 | LOC100337251           |
| 28 | 16485192 | 16498527 | 13336 | 2 | LOC100337251           |
| 28 | 16498527 | 16518037 | 19511 | 2 | LOC100337251           |
| 28 | 16518037 | 16520941 | 2905  | 2 | LOC100337251           |
| 28 | 16520941 | 16521339 | 399   | 2 | LOC100337251           |
| 28 | 16521339 | 16522156 | 818   | 2 | LOC100337251           |
| 28 | 16522156 | 16523620 | 1465  | 2 | LOC100337251           |
| 28 | 16523620 | 16524236 | 617   | 2 | LOC100337251           |
| 28 | 16524236 | 16524465 | 230   | 2 | LOC100337251           |
| 28 | 16524465 | 16525446 | 982   | 2 | LOC100337251           |
| 28 | 16525446 | 16530733 | 5288  | 2 | LOC100337251           |
| 28 | 16530733 | 16560997 | 30265 | 2 | LOC100337251           |
| 28 | 16560997 | 16566375 | 5379  | 2 | LOC100337251           |
| 28 | 16566375 | 16567570 | 1196  | 2 | LOC100337251           |
| 28 | 16567570 | 16584196 | 16627 | 2 | LOC100337251           |
| 28 | 16584196 | 16585506 | 1311  | 4 | LOC100337251           |
| 28 | 16585506 | 16585728 | 223   | 3 | LOC100337251           |
| 28 | 16585728 | 16592271 | 6544  | 2 | LOC100337251           |
| 28 | 16592271 | 16610822 | 18552 | 2 | LOC100337251           |
| 28 | 16610822 | 16614050 | 3229  | 2 | LOC100337251           |
| 28 | 16614050 | 16614480 | 431   | 2 | LOC100337251           |
| 28 | 16614480 | 16616264 | 1785  | 2 | LOC100337251           |
| 28 | 16616264 | 16617362 | 1099  | 2 | LOC100337251           |
| 28 | 16617362 | 16617575 | 214   | 2 | LOC100337251           |
| 28 | 16617575 | 16618331 | 757   | 2 | LOC100337251           |
| 28 | 16618331 | 16627148 | 8818  | 2 | LOC100337251           |
| 28 | 16627148 | 16633969 | 6822  | 2 | LOC100337251           |
| 28 | 16633969 | 16634787 | 819   | 2 | LOC100337251           |
| 28 | 16634787 | 16639883 | 5097  | 2 | LOC100337251           |
| 28 | 16639883 | 16640701 | 819   | 2 | LOC100337251           |
| 28 | 16640701 | 16641884 | 1184  | 2 | LOC100337251           |
| 28 | 16641884 | 16644976 | 3093  | 2 | LOC100337251           |
| 28 | 16644976 | 16657261 | 12286 | 3 | LOC100337251           |
| 28 | 16657261 | 16670801 | 13541 | 3 | .                      |
| 28 | 16670801 | 16709611 | 38811 | 3 | CDK1                   |
| 28 | 16709611 | 16712326 | 2716  | 3 | .                      |
| 28 | 16712326 | 16717599 | 5274  | 3 | .                      |
| 28 | 16717599 | 16725096 | 7498  | 3 | .                      |
| 28 | 16725096 | 16727510 | 2415  | 3 | .                      |
| 28 | 16727510 | 16729681 | 2172  | 4 | LOC512594              |
| 28 | 16729681 | 16730222 | 542   | 3 | LOC512594              |
| 28 | 16730222 | 16737576 | 7355  | 3 | LOC512594              |
| 28 | 16737576 | 16738463 | 888   | 4 | .                      |
| 28 | 16738463 | 16743159 | 4697  | 3 | .                      |
| 28 | 16743159 | 16754011 | 10853 | 3 | .                      |
| 28 | 16754011 | 16775284 | 21274 | 3 | .                      |
| 28 | 16775284 | 16784705 | 9422  | 3 | .                      |
| 28 | 16784705 | 16784806 | 102   | 3 | .                      |
| 28 | 16784806 | 16786929 | 2124  | 3 | .                      |
| 28 | 16786929 | 16787328 | 400   | 3 | .                      |
| 28 | 16787328 | 16792612 | 5285  | 3 | .                      |
| 28 | 16792612 | 16811932 | 19321 | 3 | RHOBTB1                |
| 28 | 16811932 | 16813103 | 1172  | 3 | RHOBTB1                |
| 28 | 16813103 | 16816813 | 3711  | 3 | RHOBTB1                |
| 28 | 16816813 | 16826724 | 9912  | 3 | RHOBTB1                |
| 28 | 16826724 | 16829296 | 2573  | 4 | RHOBTB1                |
| 28 | 16829296 | 16836320 | 7025  | 3 | RHOBTB1                |
| 28 | 16836320 | 16848855 | 12536 | 3 | RHOBTB1                |
| 28 | 16848855 | 16860111 | 11257 | 3 | RHOBTB1                |
| 28 | 16860111 | 16860477 | 367   | 4 | RHOBTB1                |
| 28 | 16860477 | 16886393 | 25917 | 3 | RHOBTB1                |
| 28 | 16886393 | 16890297 | 3905  | 3 | .                      |
| 28 | 16890297 | 16891134 | 838   | 3 | .                      |
| 28 | 16891134 | 16903508 | 12375 | 3 | .                      |
| 28 | 16903508 | 16906227 | 2720  | 3 | .                      |
| 28 | 16906227 | 16908701 | 2475  | 3 | .                      |
| 28 | 16908701 | 16910337 | 1637  | 3 | .                      |
| 28 | 16910337 | 16917553 | 7217  | 3 | .                      |
| 28 | 16917553 | 16919602 | 2050  | 2 | .                      |
| 28 | 19073578 | 19074019 | 442   | 2 | .                      |
| 28 | 19074019 | 19075343 | 1325  | 2 | .                      |
| 28 | 20106752 | 20107123 | 372   | 2 | .                      |
| 28 | 20255717 | 20259587 | 3871  | 2 | .                      |
| 28 | 20259587 | 20265168 | 5582  | 2 | .                      |
| 28 | 20265168 | 20269105 | 3938  | 2 | .                      |
| 28 | 20269105 | 20270029 | 925   | 2 | .                      |
| 28 | 20270029 | 20273244 | 3216  | 2 | .                      |
| 28 | 20273244 | 20274889 | 1646  | 2 | .                      |
| 28 | 20274889 | 20275910 | 1022  | 2 | .                      |
| 28 | 20275910 | 20285298 | 9389  | 2 | .                      |
| 28 | 20398147 | 20398460 | 314   | 2 | .                      |
| 28 | 20419017 | 20423011 | 3995  | 2 | .                      |

|    |          |          |        |   |                                                                                                       |
|----|----------|----------|--------|---|-------------------------------------------------------------------------------------------------------|
| 28 | 20423011 | 20424600 | 1590   | 2 | .                                                                                                     |
| 28 | 20424600 | 20434825 | 10226  | 2 | .                                                                                                     |
| 28 | 20434825 | 20436284 | 1460   | 2 | .                                                                                                     |
| 28 | 20436284 | 20438983 | 2700   | 2 | .                                                                                                     |
| 28 | 20438983 | 20439789 | 807    | 2 | .                                                                                                     |
| 28 | 20439789 | 20440265 | 477    | 2 | .                                                                                                     |
| 28 | 20440265 | 20450426 | 10162  | 2 | .                                                                                                     |
| 28 | 20530796 | 20531797 | 1002   | 2 | .                                                                                                     |
| 28 | 20531797 | 20532071 | 275    | 2 | .                                                                                                     |
| 28 | 20532071 | 20535404 | 3334   | 2 | .                                                                                                     |
| 28 | 20535404 | 20539190 | 3787   | 2 | .                                                                                                     |
| 28 | 20539190 | 20539392 | 203    | 2 | .                                                                                                     |
| 28 | 20539392 | 20547451 | 8060   | 2 | .                                                                                                     |
| 28 | 20547451 | 20552953 | 5503   | 2 | .                                                                                                     |
| 28 | 20552953 | 20563123 | 10171  | 2 | .                                                                                                     |
| 28 | 20563123 | 20563416 | 294    | 2 | .                                                                                                     |
| 28 | 20563416 | 20563677 | 262    | 2 | .                                                                                                     |
| 28 | 20563677 | 20565776 | 2100   | 2 | .                                                                                                     |
| 28 | 20565776 | 20568118 | 2343   | 2 | .                                                                                                     |
| 28 | 20568118 | 20592056 | 23939  | 2 | .                                                                                                     |
| 28 | 20592056 | 20592877 | 822    | 2 | .                                                                                                     |
| 28 | 20592877 | 20593283 | 407    | 2 | .                                                                                                     |
| 28 | 20654331 | 20656201 | 1871   | 2 | .                                                                                                     |
| 28 | 20710161 | 20710768 | 608    | 2 | .                                                                                                     |
| 28 | 20710768 | 20711106 | 339    | 2 | .                                                                                                     |
| 28 | 20711106 | 20711433 | 328    | 2 | .                                                                                                     |
| 28 | 20711433 | 20712957 | 1525   | 2 | .                                                                                                     |
| 28 | 20712957 | 20714540 | 1584   | 2 | .                                                                                                     |
| 28 | 20714540 | 20718959 | 4420   | 2 | .                                                                                                     |
| 28 | 20718959 | 20719178 | 220    | 2 | .                                                                                                     |
| 28 | 20719178 | 20726543 | 7366   | 2 | .                                                                                                     |
| 28 | 20776355 | 20777266 | 912    | 2 | .                                                                                                     |
| 28 | 34300447 | 34307012 | 6566   | 5 | .                                                                                                     |
| 28 | 34307012 | 34309277 | 2266   | 5 | .                                                                                                     |
| 28 | 34309277 | 34327359 | 18083  | 6 | .                                                                                                     |
| 28 | 34327359 | 34331733 | 4375   | 6 | .                                                                                                     |
| 28 | 34331733 | 34332362 | 630    | 6 | .                                                                                                     |
| 28 | 34332362 | 34334507 | 2146   | 5 | .                                                                                                     |
| 28 | 34383663 | 34384145 | 483    | 4 | .                                                                                                     |
| 28 | 34384145 | 34392206 | 8062   | 4 | LOC104969725                                                                                          |
| 28 | 34392206 | 34392817 | 612    | 5 | .                                                                                                     |
| 28 | 34392817 | 34407091 | 14275  | 6 | .                                                                                                     |
| 28 | 34407091 | 34410398 | 3308   | 6 | .                                                                                                     |
| 28 | 34410398 | 34411131 | 734    | 6 | .                                                                                                     |
| 28 | 34411131 | 34411976 | 846    | 6 | .                                                                                                     |
| 28 | 34411976 | 34413397 | 1422   | 6 | .                                                                                                     |
| 28 | 34413397 | 34415719 | 2323   | 6 | .                                                                                                     |
| 28 | 34415719 | 34420806 | 5088   | 6 | .                                                                                                     |
| 28 | 34420806 | 34421897 | 1092   | 6 | .                                                                                                     |
| 28 | 34421897 | 34441730 | 19834  | 6 | .                                                                                                     |
| 28 | 34441730 | 34444914 | 3185   | 7 | .                                                                                                     |
| 28 | 34444914 | 34461206 | 16293  | 6 | .                                                                                                     |
| 28 | 34461206 | 34461546 | 341    | 5 | .                                                                                                     |
| 28 | 34461546 | 34464360 | 2815   | 7 | .                                                                                                     |
| 28 | 34464360 | 34464911 | 552    | 7 | .                                                                                                     |
| 28 | 34464911 | 34465263 | 353    | 7 | .                                                                                                     |
| 28 | 34465263 | 34465885 | 623    | 7 | .                                                                                                     |
| 28 | 34465885 | 34466441 | 557    | 6 | .                                                                                                     |
| 28 | 34466441 | 34467030 | 590    | 6 | .                                                                                                     |
| 28 | 34467030 | 34467721 | 692    | 6 | .                                                                                                     |
| 28 | 34467721 | 34470909 | 3189   | 6 | .                                                                                                     |
| 28 | 34470909 | 34486885 | 15977  | 6 | .                                                                                                     |
| 28 | 34486885 | 34487005 | 121    | 5 | .                                                                                                     |
| 28 | 34487005 | 34489090 | 2086   | 6 | .                                                                                                     |
| 28 | 34489090 | 34492446 | 3357   | 6 | .                                                                                                     |
| 28 | 34492446 | 34493452 | 1007   | 7 | .                                                                                                     |
| 28 | 34493452 | 34506225 | 12774  | 6 | .                                                                                                     |
| 28 | 34506225 | 34509251 | 3027   | 6 | .                                                                                                     |
| 28 | 34509251 | 34512379 | 3129   | 6 | .                                                                                                     |
| 28 | 34512379 | 34516253 | 3875   | 6 | .                                                                                                     |
| 28 | 34516253 | 34517639 | 1387   | 6 | .                                                                                                     |
| 28 | 34517639 | 34518944 | 1306   | 6 | .                                                                                                     |
| 28 | 34518944 | 34526055 | 7112   | 6 | .                                                                                                     |
| 28 | 34526055 | 34535217 | 9163   | 6 | .                                                                                                     |
| 28 | 34535217 | 34538756 | 3540   | 6 | .                                                                                                     |
| 28 | 34538756 | 34556115 | 17360  | 6 | .                                                                                                     |
| 28 | 34556115 | 34563340 | 7226   | 6 | .                                                                                                     |
| 28 | 34563340 | 34566325 | 2986   | 6 | .                                                                                                     |
| 29 | 109      | 121883   | 121775 | 3 | LOC101905316 LOC104969772                                                                             |
| 29 | 121883   | 877969   | 756087 | 2 | HEPHL1 LOC100297728 LOC104970173 LOC104976209 LOC107131344 LOC516870<br>LOC789688 PANX1               |
| 29 | 877969   | 1503538  | 625570 | 3 | C29H11orf54 CCDC67 CEP295 LOC100140332 LOC101906859 LOC107131948<br>LOC784357 MED17 SMC04 TAF1D VSTM5 |



**Supplementary Table 28. Information of regions of yak introgression into Tibetan taurine cattle associated with hypoxia**

| Chr | Start (bp) | End (bp) | Size (bp) | Hap (n) | Gene content of the introgressed interval                                                                                                                             | Biological process                                                                                                                                                                                                                                                                                                                                                                      |
|-----|------------|----------|-----------|---------|-----------------------------------------------------------------------------------------------------------------------------------------------------------------------|-----------------------------------------------------------------------------------------------------------------------------------------------------------------------------------------------------------------------------------------------------------------------------------------------------------------------------------------------------------------------------------------|
| 11  | 46348628   | 47006375 | 657748    | 6       | <i>CKAP2L IL1A IL1B IL1F10 IL1RN IL36A IL36B IL36G IL36RN IL37 LOC101903687 LOC101904177 LOC104973371 LOC107132933 LOC107132936 NT5DC4 PAX8 PSD4 SLC20A1</i>          | HIF pathway candidate genes                                                                                                                                                                                                                                                                                                                                                             |
| 14  | 33359502   | 33670520 | 311019    | 2       | <i>ARFGEF1 COPS5 CSPP1 PPP1R42 TCF24</i>                                                                                                                              | HIF pathway candidate genes                                                                                                                                                                                                                                                                                                                                                             |
| 15  | 22695068   | 22988949 | 293882    | 2       | <i>BCO2 C15H11orf1 C15H11orf52 C15H11orf57 CRYAB DIXDC1 DLAT HSPB2 IL18 LOC101903059 LOC101903125 LOC101906594 LOC104968480 LOC104974189 PIH1D2 SDHD TEX12 TIMM8B</i> | Hypoxia should cause a significant increase in the concentration of intracellular reactive oxygen species (ROS) in pulmonary cells, and accordingly ROS should then lead to large increase in intracellular concentration of Ca <sup>2+</sup> mediated by multiple ion channels. Both ROS and Ca <sup>2+</sup> are important signaling molecules that regulate the response to hypoxia. |
| 28  | 3297645    | 3318884  | 21240     | 2       | <b>EGLN1</b>                                                                                                                                                          | HIF pathway candidate genes                                                                                                                                                                                                                                                                                                                                                             |
| 28  | 10354990   | 10358433 | 3444      | 2       | <b>RYR2</b>                                                                                                                                                           | RYR2, a ryanodine receptor, functions to release Ca <sup>2+</sup> and plays a crucial role in pulmonary vasoconstriction during hypoxia to ensure regional alveolar ventilation and pulmonary perfusion                                                                                                                                                                                 |
| 28  | 10358433   | 10364707 | 6275      | 2       |                                                                                                                                                                       |                                                                                                                                                                                                                                                                                                                                                                                         |
| 28  | 10364707   | 10365083 | 377       | 2       |                                                                                                                                                                       |                                                                                                                                                                                                                                                                                                                                                                                         |
| 28  | 10365083   | 10375564 | 10482     | 2       |                                                                                                                                                                       |                                                                                                                                                                                                                                                                                                                                                                                         |
| 28  | 10375564   | 10376188 | 625       | 2       |                                                                                                                                                                       |                                                                                                                                                                                                                                                                                                                                                                                         |
| 28  | 10376188   | 10376376 | 189       | 2       |                                                                                                                                                                       |                                                                                                                                                                                                                                                                                                                                                                                         |
| 28  | 10418805   | 10418924 | 120       | 2       |                                                                                                                                                                       |                                                                                                                                                                                                                                                                                                                                                                                         |
| 28  | 10418924   | 10425004 | 6081      | 2       |                                                                                                                                                                       |                                                                                                                                                                                                                                                                                                                                                                                         |
| 28  | 10425004   | 10426026 | 1023      | 2       |                                                                                                                                                                       |                                                                                                                                                                                                                                                                                                                                                                                         |
| 28  | 10426026   | 10435536 | 9511      | 2       |                                                                                                                                                                       |                                                                                                                                                                                                                                                                                                                                                                                         |
| 28  | 10504537   | 10510491 | 5955      | 2       |                                                                                                                                                                       |                                                                                                                                                                                                                                                                                                                                                                                         |
| 28  | 10510491   | 10512284 | 1794      | 2       |                                                                                                                                                                       |                                                                                                                                                                                                                                                                                                                                                                                         |
| 28  | 10512284   | 10521925 | 9642      | 2       |                                                                                                                                                                       |                                                                                                                                                                                                                                                                                                                                                                                         |
| 28  | 10521925   | 10527910 | 5986      | 2       |                                                                                                                                                                       |                                                                                                                                                                                                                                                                                                                                                                                         |
| 28  | 10527910   | 10530050 | 2141      | 2       |                                                                                                                                                                       |                                                                                                                                                                                                                                                                                                                                                                                         |
| 28  | 10530050   | 10530421 | 372       | 3       |                                                                                                                                                                       |                                                                                                                                                                                                                                                                                                                                                                                         |
| 28  | 10530421   | 10536290 | 5870      | 2       |                                                                                                                                                                       |                                                                                                                                                                                                                                                                                                                                                                                         |
| 28  | 10536290   | 10553326 | 17037     | 2       |                                                                                                                                                                       |                                                                                                                                                                                                                                                                                                                                                                                         |
| 28  | 10553326   | 10560747 | 7422      | 2       |                                                                                                                                                                       |                                                                                                                                                                                                                                                                                                                                                                                         |
| 28  | 10560747   | 10569767 | 9021      | 2       |                                                                                                                                                                       |                                                                                                                                                                                                                                                                                                                                                                                         |

**Supplementary Table 29. Proportion of missing alleles in specific SNPs of different species of the tribe of Bovini.**

| Samples   | Species                | Missing alleles | Specific SNPs | Missing alleles in specific SNPs | Proportion of missing alleles in specific SNPs |
|-----------|------------------------|-----------------|---------------|----------------------------------|------------------------------------------------|
| Banteng01 | <i>Bos javanicus</i>   | 2,385,779       | 4,551,280     | 175,760                          | 0.038618                                       |
| Banteng02 | <i>Bos javanicus</i>   | 1,629,512       | 4,551,280     | 20,771                           | 0.004564                                       |
| Bision01  | <i>Bison bision</i>    | 2,306,628       | 2,460,180     | 152,341                          | 0.061923                                       |
| Bision02  | <i>Bison bision</i>    | 415,949         | 2,460,180     | 3,490                            | 0.001419                                       |
| Wisent01  | <i>Bison bonasus</i>   | 1,457,280       | 2,477,513     | 84,589                           | 0.034143                                       |
| Wisent02  | <i>Bison bonasus</i>   | 434,223         | 2,477,513     | 10,486                           | 0.004232                                       |
| Wisent03  | <i>Bison bonasus</i>   | 534,416         | 2,477,513     | 13,235                           | 0.005342                                       |
| Yak01     | <i>Bos grunniens</i>   | 623,929         | 3,092,273     | 29,831                           | 0.009647                                       |
| Yak02     | <i>Bos grunniens</i>   | 580,270         | 3,092,273     | 26,409                           | 0.00854                                        |
| Yak03     | <i>Bos grunniens</i>   | 4,135,174       | 3,092,273     | 391,329                          | 0.126551                                       |
| Yak04     | <i>Bos grunniens</i>   | 2,436,909       | 3,092,273     | 242,469                          | 0.078411                                       |
| Yak05     | <i>Bos grunniens</i>   | 1,332,805       | 3,092,273     | 112,896                          | 0.036509                                       |
| Yak06     | <i>Bos grunniens</i>   | 1,018,264       | 3,092,273     | 78,608                           | 0.025421                                       |
| Yak07     | <i>Bos grunniens</i>   | 1,341,774       | 3,092,273     | 113,086                          | 0.036571                                       |
| Yak08     | <i>Bos grunniens</i>   | 1,742,468       | 3,092,273     | 159,483                          | 0.051575                                       |
| Yak09     | <i>Bos grunniens</i>   | 1,243,638       | 3,092,273     | 103,064                          | 0.033333                                       |
| Yak10     | <i>Bos grunniens</i>   | 573,124         | 3,092,273     | 26,325                           | 0.008513                                       |
| Yak11     | <i>Bos grunniens</i>   | 5,717,308       | 3,092,273     | 466,308                          | 0.150798                                       |
| Yak12     | <i>Bos grunniens</i>   | 935,004         | 3,092,273     | 40,851                           | 0.013211                                       |
| Yak13     | <i>Bos grunniens</i>   | 551,396         | 3,092,273     | 27,053                           | 0.008749                                       |
| Gaurus01  | <i>Bos gaurus</i>      | 6,281,380       | 3,999,129     | 576,628                          | 0.144188                                       |
| Gaurus02  | <i>Bos gaurus</i>      | 2,798,378       | 3,999,129     | 109,727                          | 0.027438                                       |
| Buffalo01 | <i>Bubalus bubalis</i> | 4,543,003       | 2,241,071     | 37,147                           | 0.016576                                       |
| Buffalo02 | <i>Bubalus bubalis</i> | 4,546,969       | 2,241,071     | 38,238                           | 0.017062                                       |

**Supplementary Table 30. Parameters and results inferred by *∂a∂i* simulations**

| Events                                                                                           | Item symbols | Confidence interval (95%) |             | Point estimation |
|--------------------------------------------------------------------------------------------------|--------------|---------------------------|-------------|------------------|
|                                                                                                  |              | 2.50%                     | 97.50%      |                  |
| Ancestral population size                                                                        | N.nuPre      | 20660.62                  | 39352.4     | 22546.81492      |
| Time0                                                                                            | T.Tpre       | 2863.039                  | 6008.068    | 5429.796944      |
| Population size of Chinese indicine cattle between Time0-Time1                                   | N.nu1_0      | 822.5144                  | 1217.9633   | 952.6081903      |
| Population size of Indian indicine cattle between Time0-Time2                                    | N.nu2_0      | 32908.68                  | 45725.18    | 43839.00953      |
| Population size of Chinese indicine cattle between Time1-Time4 (present)                         | N.nu1_1      | 29524.11                  | 30995.31    | 29899.05347      |
| Population size of Indian indicine cattle between Time3-Time4 (present)                          | N.nu2_1      | 11235.79                  | 12976.05    | 11879.62965      |
| Time1: the first split between Chinese indicine cattle and Indian indicine cattle                | T.T1         | 30299.51                  | 52677.4     | 40149.97         |
| Time2: population size expansion of Chinese indicine cattle                                      | T.T2         | 23709.87                  | 40703       | 32015.99         |
| Time3: population size decline of Indian indicine cattle                                         | T.T3         | 9248.557                  | 12923.49    | 11542.99         |
| Migration from Indian indicine cattle into Chinese indicine cattle between Time1-Time2           | M.m12_1      | 0.000144426               | 0.000291131 | 0.000244922      |
| Migration from Chinese indicine cattle into Indian indicine cattle between Time1-Time2           | M.m21_1      | 1.70E-08                  | 1.43E-05    | 6.36E-06         |
| Migration from Indian indicine cattle into Chinese indicine cattle between Time2-Time3           | M.m12_2      | 8.36E-05                  | 1.64E-04    | 0.000129225      |
| Migration from Chinese indicine cattle into Indian indicine cattle between Time2-Time3           | M.m21_2      | 9.77E-05                  | 2.00E-04    | 0.000123741      |
| Migration from Indian indicine cattle into Chinese indicine cattle between Time3-Time4 (present) | M.m12_3      | 5.30E-08                  | 2.85E-06    | 2.26E-06         |
| Migration from Chinese indicine cattle into Indian indicine cattle between Time3-Time4 (present) | M.m21_3      | 1.63E-08                  | 2.51E-07    | 2.30E-07         |

## Supplementary Note 1

### Whole-genome resequencing

In total, 111 DNA samples of Chinese native cattle representing 22 breeds and three DNA samples of Indian indicine breeds were collected. Paired-end libraries were generated for each individual using standard procedures. The average insert size was 500 bp, and the read length was 150 bp. All libraries were sequenced on an Illumina HiSeq 2000 platform to an average raw read sequence coverage of 10 X, assuming a genome size of 2.87 Gb. The average coverage was approximately 11.88 X (ranging from 8.29 X to 36.85 X). Such depth ensured the accuracy of variant calling and genotyping, and met the requirements for population genetic analyses. Additional detailed information on the mapping rate and sequencing depth are provided in Supplementary Table 1.

### Definition of geographic regions discussed in the text

We also combined our data with those from 146 available whole-genome resequencing samples from 24 breeds worldwide<sup>1-6</sup>, including 83 European taurine cattle, 26 Northeast Asian taurine cattle, eight Iranian cattle, 17 American indicine cattle, and 12 African cattle. The sequencing coverage was approximately 13.37 X (ranging from 3.92 X to 25.26 X) per individual. According to the sample information and the origin of cattle breeds, ten geographic regions were defined (Fig. 1a and Supplementary Table 2). We also used 25 whole-genome data from extant domestic and wild species within Bovini, including gaur, bison, wisent, banteng, gayal, yak, and buffalo for outgroup and introgression analysis<sup>1,7-10</sup>. The average coverage was approximately 11.17 X (ranging from 4.12 X to 38.96 X) per individual.

### Variant discovery and genotyping

A total of 260 samples were used as final set for variant discovery. First, all cleaned reads were mapped to the cattle reference assembly Btau\_5.0.1 (GCF\_000003205.7) using BWA-MEM (0.7.13-r1126) with default parameters<sup>11</sup>. The average mapping rate was 98.88%, and the sequencing coverage was approximately 12.72 X. Duplicate reads were removed using Picard Tools (<http://broadinstitute.github.io/picard/>). Then, the Genome Analysis Toolkit (GATK, version 3.6-0-g89b7209) was used to detect single nucleotide polymorphisms (SNPs)<sup>12</sup>. The following criteria were applied to all SNPs: (1) SNPs mean sequencing depth (over all included individuals)  $< 1/3X$  and  $> 3X$  were filtered; (2) SNPs with Variant Confidence/Quality by Depth (QD)  $< 2$  were filtered; (3) SNPs with RMS Mapping Quality (MQ)  $< 40.0$  were filtered; (4) SNPs with Phred-scaled *P*-value using Fisher's exact test to detect strand bias (FS)  $> 60$  were filtered; (5) SNPs with Z-score according to the Wilcoxon rank sum test of Alt vs. Ref read mapping qualities (MQRankSum)  $< -12.5$  were filtered; (6) SNPs with Z-score according to the Wilcoxon rank sum test of Alt vs. Ref read position bias (ReadPosRankSum)  $< -8$  were filtered; (7) SNPs with maximum missing rate  $< 0.1$ ; and (8) SNPs

with only two alleles. A total of 60.4 million autosomal SNPs were identified and used in subsequent analyses. The identified SNPs were further classified based on the gene annotation for the reference genome. SNPs were categorized as variants in intergenic regions, 5'-UTRs, coding sequences (exon), introns, 3'-UTRs and noncoding regions. SNPs in coding sequences were further grouped as synonymous SNPs not causing amino acid changes or nonsynonymous SNPs causing amino acid changes. In addition, nonsense mutations were defined as mutations causing premature stops, elongated transcripts or introduced false start codons. The distribution of SNPs within various genomic regions is shown in Supplementary Table 3.

The whole-genome data from seven extant species were mapped in the same way. We used 60.4 million SNPs as reference list to genotype the combined set of 260 cattle samples and 25 samples of seven extant Bovini species. The final genotype data were imputed and phased using BEAGLE (version 4.1).

## **Supplementary Note 2**

### **Population genomic analyses**

#### **Principle component analysis (PCA)**

VCF files encoding individual genotypes were generated. This merged VCF file containing a total of 60,449,904 variants was converted to PLINK format with VCFtools v0.1.12 (<https://vcftools.github.io/index.html>)<sup>13</sup>. SNPs were filtered based on a minor allele frequency (MAF) > 0.0057 to insure at least three alleles were found in sample set. We removed "all LD" using the --indep-pairwise 50 5 0.2 option of PLINK(version 1.9)<sup>14</sup>. The same SNPs set was used for PCA, TreeMix, and ADMIXTURE analysis. The PCA was performed based on the genome-wide unlinked SNP dataset using the software Eigensoft (version 4.2)<sup>15</sup>. The Tracy-Widom test was used to determine the significance level of the eigenvectors. This package was used with various functions to perform the PCA on the genetic data to analyse the population structure. The results were plotted with ggplot2 in R 3.02<sup>16</sup>. Three groups were used for the PCA: (1) all 260 animals were used as first group, with the first three principal components cumulatively explaining 7.40 % of the total variance (Fig. 1b and 1c, Supplementary Table 4); Within *Bos indicus*, a clear partitioning was apparent between cattle from India and South China (Fig. 1c). (2) And 142 individuals from 21 *Bos taurus* breeds, including 13 European breeds (Angus, Red Angus, Charolais, Devon, Gelbvieh, Hereford, Holstein, Jersey, Limousin, Maine Anjou, Piedmontese, Salers, and Simmental), three Northwest Chinese breeds (Chaidamu, Kazakh, and Mongolian), four East Asian breeds (Hanwoo, Kuchinoshima, Mishima, and Yanbian), and Tibetan cattle (Supplementary Fig. 1 and Supplementary Table 5); (3) Fifty individuals of *Bos indicus* from 13 breeds, including six Indian indicine breeds (Hariana, Sahiwal, Tharparkar, Brahman, Gir, and Nelore) and seven Chinese indicine breeds (Guangfeng, Jian, Jingjiang, Leiqiong,

Wannan, Wenshan, and Dianzhong) (Supplementary Fig. 1 and Supplementary Table 6). The first PC separates Indian indicine and Chinese indicine cattle. The second component displays the contrast of Nelore to other indicine cattle. The result was consistent with the PCA of all samples. The genotype likelihood approach was also used to repeat the PCA result (Supplementary Fig. 3).

### **Neighbour-joining (NJ) tree and maximum likelihood (ML) phylogenetic trees**

To identify closely related individuals, a total of 60,449,904 autosomal SNPs were selected to construct a NJ tree with PLINK using the matrix of pairwise genetic distances. Two banteng samples were rooted as outgroup (Fig. 1d). The pairwise distances used for building the NJ tree given in Supplementary Data 1. Then we inferred a population-level phylogeny using the ML approach implemented in TreeMix. We removed "all LD" using the `--indep-pairwise 50 5 0.2` option of PLINK<sup>14</sup>. The window size of 1000 was used to account for linkage disequilibrium (`-k`) and `"-global"` to generate the ML tree (Supplementary Fig. 4). MEGA v7.0 and FigTree (<http://tree.bio.ed.ac.uk/software/figtree/>) were used to visualize the phylogenetic trees.

### **Structure analysis**

To quantify the genome-wide admixture among modern cattle populations, we estimated the ancestry of each individual using the genome-wide unlinked SNP dataset used for the PCA with the model-based assignment program ADMIXTURE 1.3<sup>17</sup>. ADMIXTURE was run for each possible group number ( $K = 2$  to 8), and 200 bootstrap replicates were performed to estimate the parameter standard errors, which were used to determine the optimal group number ( $K$ ) (Supplementary Table 7). Surprisingly, number of presumed ancestral populations ( $K$ ) showed genetically distinct clusters that reflect geographic proximity. We found strong support for two population subdivisions ( $K = 2$ ), which was consistent with the deep division of the *Bos taurus* and *Bos indicus* lineages. The population subdivision at  $K = 3$  reproduces the second PCA coordinated by separating the European cattle (West Europe and Central-South Europe) and East Asian (Tibetan and Northeast Asian) cattle. The population subdivision at  $K = 4$  reproduces the third PCA coordinated by separating the cattle of South China from other indicine samples. The Chinese indicine cattle (Leiqiong, Jingjiang, Guangfeng, Ji'an, Wannan, and Wenshan) were clearly separated from the Indian indicine cattle (Haryana, Sahiwal, Tharparkar, Brahman, Gir, and Nelore) at  $K = 4$  (Supplementary Fig. 5). Population subdivisions at  $K = 5$  produced different *Bos taurus* groups and revealed a strong clustering of taurine cattle into three main clusters: European taurine ancestry (Hereford and Angus), Eurasian taurine ancestry (Piedmontese, Gelbvieh, Limousin, and Simmental), and East Asian taurine ancestry (Tibetan, Mishima, Kuchinoshima, Hanwoo, and Yanbian). We noticed that Tibetan and Northeast Asian breeds constituted a distinct group referred as East Asian taurine cattle. We also detected Indian indicine ancestry in Northwest and Southwest China, which could provide evidence for two immigration routes of indicine cattle from India into China. Cattle from Middle East showed hybrid ancestries. To ensure

no bias in the results, NgsAdmix was used to repeat the ADMIXTURE result (Supplementary Fig. 6). The result of  $K=5$  is consistent with the result of ADMIXTURE, except that the Holstein cattle have both ancestries of European taurine and Eurasian taurine cattle.

### Supplementary Note 3

#### Paternal analysis

The bovine male-specific region (MSY) consists of three major regions: X-degenerate (Xd), Y-transitional (Yt), and Y-ampliconic (Ya). The Xd region, split into two sub-regions at either end of the MSY, spans from 2.5-3.9 Mb (Xd1) and 42.2-43.3 Mb (Xd2). We only selected the Xd regions of the Btau\_5.0.1 Y chromosome reference sequence (GCF\_000003205.7)<sup>18</sup>. All analyses in this part were restricted to this region. We called genotypes as described in Supplementary Note 1. Thirty-one female cattle were used as controls. We also removed heterozygous sites and sites with missing genotypes in 10% of the sampled individuals. Missing calls ranged from 0 to 328 per individual. Final SNPs were filtered based on an MAF of 0.002. After performing quality control and filtering, we extracted 745 SNPs, and 69 were located in the *USP9Y*, *UTY*, and *ZFY* genes. The genotypes of 745 SNPs are shown in Supplementary Data 2. We used 745 SNPs in 214 individuals to construct a haplogroup tree, which was rooted using the yak sequence. Sequence alignments were built using CLUSTALW2 (<http://www.clustal.org/>), and a maximum parsimony (MP) phylogenetic tree was created using the software PHYLIP (<http://evolution.gs.washington.edu/phylip.html>) (Supplementary Fig. 7a). We used BEAGLE to impute missing alleles<sup>19</sup> and checked them according to the tree structure. The only errors introduced by this procedure will be missed reversions or recurrent mutations, both are rare. We then used imputed sequences to build a MP tree (Supplementary Fig. 7b). Additional phylogenetic trees were then inferred using both ML and Bayesian methods. A ML analysis was conducted with MEGA 7.0 (Supplementary Fig. 7c). We also performed Bayesian phylogenetic inferences using BEAST 1.8.2<sup>20</sup>. The Bayesian phylogenetic inferences were run for 50,000,000 generations, the chain was sampled every 5,000 generations (thin-in interval), and the first 10% of the chains was discarded as burn-in. We analysed the MCMC samples with TRACER 1.5, which indicated convergence and adequate mixing of the Markov chains. We then used TREEANNOTATOR 1.7.5 to summarize the MCMC samples as the maximum clade credibility topology. The tree drawn with Figtree v1.4.2 (<http://tree.bio.ed.ac.uk/software/figtree/>) is shown in Supplementary Fig. 7d. We also constructed a network using imputed data (Fig. 3a).

#### Whole mitochondrial genome phylogeny

Following the procedure described in Supplementary Note 1, we mapped the sequencing reads of all 260 modern cattle (Supplementary Table 1) against the reference bovine mitochondrial genome (GenBank: AY526085.1). To assemble the complete mitochondrial genome, samples with a

depth-of-coverage lower than 100 X were disregarded, which resulted in a total of 147 mitochondrial genomes (Supplementary Table 8). The average depth-of-coverage was 1152.04 X and ranged from 138.77 to 3626.71 X. BAM alignments were converted to fastq and subsequently used with Mapping Iterative Assembler V 1.0 (MIA) to assemble a mtDNA consensus sequence.

We aligned our 147 mitochondrial genome sequences to a collection of 24 published *genus Bos* and *Bison* mitochondrial genomes<sup>21-24</sup>. This collection encompasses most of the mitochondrial haplotypes present in cattle (Supplementary Table 8). The TrN+G+I model of nucleotide substitution was selected by comparing the Bayesian information criterion (BIC) scores in ModelGenerator v0.85<sup>25</sup>. A phylogenetic tree was then inferred using both ML and Bayesian methods. A ML analysis was performed with the program PhyML 3.0<sup>26</sup> using both NNI and SPR rearrangements to search for the tree topology, and approximate likelihood-ratio tests were performed to establish statistical support of internal branches (Supplementary Fig. 8a). We also performed Bayesian phylogenetic inferences using BEAST 1.8.2<sup>20</sup>. The Bayesian phylogenetic inferences were run for 50,000,000 generations, the chain was sampled every 5,000 generations (thin-in interval), and the first 10% of the chains was discarded as burn-in. We analysed the MCMC samples with TRACER 1.5, which indicated convergence and adequate mixing of the Markov chains. We then used TREEANNOTATOR 1.7.5 to summarize the MCMC samples as the maximum clade credibility topology. The tree drawn with Figtree v1.4.2 (<http://tree.bio.ed.ac.uk/software/figtree>) is shown in Supplementary Fig. 8b along with the corresponding node support values (posterior probabilities).

Consistent with previous reports that identified T4 haplogroup only in Northeast Asian cattle, the T4 mtDNA haplogroup was observed in our samples<sup>23</sup>.

## **Supplementary Note 4**

### **Details on the archaeological specimens**

The Shimao archaeological site, which belongs to the Longshan period, is located in the town of Gaojiabao, which is approximately 40 km southwest of Shenmu County in Yulin District, Shaanxi Province, China. The large scale of this site (4,000,000 m<sup>2</sup>), the skilled construction technique, and the integrated defence system contributed to the outstanding quality of the Shimao site among the Neolithic walled settlements in East Asia<sup>27</sup>. Eight bovine bones analysed in this study include a radius (left), tibia (right), tibia (left), metacarpal (left), humerus (right), metapodial (left), radius (left), and metapodial (right) (named Shimao01, Shimao02, Shimao03, Shimao04, Shimao05, Shimao06, Shimao07, and Shimao08, respectively). The humerus bone from specimen Shimao05 (Supplementary Fig. 9) was directly radiocarbon dated at the Beta Analytic Radiocarbon Dating Laboratory, Miami, Florida, and it was dated conservatively to 3,975-3,835 cal BP with a 95% confidence interval (Supplementary Table 9). These dates are consistent with previous radiocarbon determinations from Shimao, which dated the site to ca. 2300-1800 cal. BCE<sup>27</sup>.



### **Ancient genome data processing**

Sample preparation, extraction, and library preparation were performed in a dedicated ancient DNA laboratory in the Kunming Institute of Zoology, Yunnan, China. Paired-end sequencing data were generated using the Illumina® HiSeq X Ten platform at the Beijing Genome Institute (BGI), Shenzhen, China using 150 bp reads. Adapter sequences of the paired-end reads were identified and removed using AdapterRemoval version 2.2.0. We merged read pairs where the expected index was observed, and they required an overlap of at least 11 bp. All processed sequences were mapped to the Btau 5.0.1 reference genome using BWA version 0.7.12-r1039 with the parameters `aln -l 1024`, and PCR duplicate reads with identical start and end coordinates were collapsed into consensus sequences using SAMtools version 1.3.1. Then, we counted the mismatch using ANGSD with `"-doMisMatch"` option, and plotted the damage pattern (Supplementary Fig. 10). All ancient samples were genotyped according to the SNP set of all modern samples using the following criteria: (1) minimum Phred-scaled mapping quality of 20; (2) minimum base quality score of 30; (3) minimum fraction of reads supporting heterozygous of 0.2; and (4) maximum DP of 10. Finally, all sites containing transitions were removed because all ancient samples have post mortem damage that strongly increases the errors at sites that contain transitions. We obtained low-coverage genome sequences (0.01-2.63 average depth, overall average equal to 0.40) from eight ancient Shimaos cattle (Supplementary Table 10).

To investigate the relationship of the Shimaos specimens to current East Asian cattle populations, we selected "core" groups of the five components based on the structure according to AdmixTools for the phylogenetic analysis. We also used three-population test estimates ( $f_3$  statistics) to test for admixtures across all modern cattle populations<sup>28</sup>. Three-population tests consider population triplets (C; A, B), where C is the test population and A and B are the reference populations. The Z-scores were calculated by jack-knifing with blocks of 445 SNPs. Significantly negative Z-scores ( $Z \leq -3.80$ , after Bonferroni correction for multiple testing) indicate evidence of test population C containing an admixture of both reference populations of A and B. The high number of significant  $f_3$  statistics suggested an admixture for two breeds (Mongolian and Kazakh) from Northwest China (Supplementary Table 11), suggesting an additional southwestern immigration route of indicine cattle from India into northwest China in recent time. All African breeds exhibited evidence of *Bos taurus* and *Bos indicus* ancestries (Supplementary Table 12). Supplementary Table 13 shows examples of the most significant  $f_3$  statistics for various cattle breeds of North-Central China, with Chinese indicine (Leiqiong) as one of the source populations. We performed all possible triplet combinations (Supplementary Table 14). Finally, a total of 109 individuals from the five "core" groups were selected (Supplementary Table 15), a neighbour-joining tree was constructed following the procedure described in Supplementary Note 2, and it was based on the pairwise distance matrix data calculated by PLINK for the five "core" group samples and eight ancient samples (Fig. 4a)<sup>14</sup>. The

results showed that the ancient samples were closely related to Hanwoo and Japanese cattle, indicating that the ancient cattle belonged to the East Asian taurine group.

To further investigate the gene flow between Shimao cattle and different worldwide populations, the  $f_3$  statistics for (indicine cattle; Ancient, population B) were quantified for a set of 42 worldwide populations using ~50 M SNPs. Indicine group are three individuals of Hariana, Sahiwal, and Tharparkar cattle. The highest  $f_3$  statistics were observed for Northeast Asian cattle (Kuchinoshima, Yanbian, Hanwoo, and Mishima), followed by the West Europe and Central-South Europe populations (Fig. 4b).

We also used  $D$  statistics to test whether ancient Shimao cattle shared more alleles with East Asian taurine or with European taurine cattle<sup>29</sup>. The  $D$  statistics method considers the tree topology  $((W, X), Y), O$ , where  $O$  represents the outgroup,  $Y$  represents the ancient population, the pattern of ABBA reflects gene flow between  $W$  and  $X$ , and the pattern BABA reflects gene flow between  $W$  and  $Y$ . The  $D$  statistics method quantifies the occurrence of two incomplete sorting patterns called ABBA and BABA events, where  $W$  and  $X$  refer to ancestral (namely, identical to  $O$ ) and derived allelic states. ABBA events occur when  $X$  and  $Y$  share the derived allele ( $B$ ) and  $W$  carries the ancestral allele ( $A$ ). Conversely, in BABA events, the ancestral allele ( $A$ ) is carried by  $X$  while the derived allele is shared by  $W$  and  $Y$ . Under the null hypothesis that the tree is correct and there is no gene flow connecting  $Y$  to either  $W$  or  $X$ , the ABBA and BABA events result from incomplete lineage sorting and thus should occur with equal frequency. The enrichment of ABBA or BABA sites, therefore, indicates the possible presence of gene flow between the  $X$  and  $Y$  or  $W$  and  $Y$  lineages, respectively. To comprehensively assess the amount of gene flow between the cattle lineages, we calculated multiple  $D$  statistics corresponding to different taxa combinations as  $W, X$  or  $Y$  compatible with the inferred tree topology (Supplementary Table 16). Buffalo was used as the outgroup species. Using  $D$  statistics, we confirmed that ancient Shimao cattle shared more derived polymorphisms with the East Asian taurine, except Tibetan taurine cattle (Supplementary Fig. 11).

## **Supplementary Note 5**

### **Introgression analysis**

The nucleotide diversity ( $\pi$ ) of all groups were calculated using a sliding window approach with windows of 50-kb. The nucleotide diversity of five "core" groups revealed that Chinese indicine genomes showed the highest nucleotide diversity among the five "core" groups (Fig. 4c and Supplementary Fig. 12). To detect the effects of different coverages on analysis. We measured nucleotide diversity at group level again using genotype likelihood approach. For autosomal chromosomes, we estimated the SFS with ANGSD (-doSaf2). The nucleotide diversity were calculated with  $-doThetas$ . The result also recapitulated that Chinese indicine genomes showed the highest nucleotide diversity (Supplementary Fig. 13). The comparisons also showed that Chinese indicine

cattle and *Bos javanicus* shared the most SNPs (~4.7 M), followed by *Bos taurus* (~3.7 M) and *Bos frontalis* (~3.5 M) (Supplementary Table 17), suggesting interspecies introgressions in the history of Chinese indicine cattle. We hypothesised that this increased unique diversity could be influenced by particular (but unknown) historical demography such as population expansion but the scale of this unique diversity suggests hybridization with or introgression from different bovine species. So we used a combination of analyses, including  $f_3$  statistics,  $D$  statistics and Treemix, to test this introgression hypothesis. We ran  $f_3$  statistics on population triples using Chinese indicine cattle as a target (admixture population) and Indian indicine cattle and other Bovini species as the source populations, including two gaur, two bison, three wisent, two banteng, one gayal, 13 yaks, and two buffaloes (Supplementary Table 2). We used the KING software<sup>30</sup> to evaluate the relatedness of samples within each *Bos* species, including gaur, bison, wisent, banteng, and yak. The two banteng were not within a 3rd-degree relationship (Kinship = 0.0072). Negative kinship coefficients estimates indicated that the other *Bos* samples were unrelated.

Our test using banteng and Indian indicine cattle as the sources produced a remarkably significant Z-score of -26.97, followed by gayal (Supplementary Table 18).  $D$  statistics tests were applied following the tree topology (Buffalo, Chinese indicine cattle; Banteng, other Bovini species), and the results suggested that Chinese indicine cattle was possibly introgressed from banteng, followed by gayal (Supplementary Table 19). TreeMix also confirmed the gene flow from *Bos javanicus* into Chinese indicine cattle and the introgression from yak into Tibetan taurine cattle (Supplementary Fig. 14). Chinese Yunnan gayal, also named Dulong cattle, originated from the hybridization between male *Bos frontalis* and female *Bos taurus* or *Bos indicus*<sup>31</sup>. Consider that there was only one individual of gayal and it showed gene flow from Chinese indicine cattle into *Bos frontalis* in TreeMix. The introgression from *Bos frontalis* in Chinese indicine cattle needs further confirmation.

### **Possible Banteng introgression into Chinese indicine cattle**

We then used the method for the analysis of introgressive hybridization of Mongolian yak<sup>32</sup> to confirm *Bos javanicus* introgression into Chinese indicine and yak introgression into Tibetan taurine cattle (Fig. 5). To detect introgression from banteng into Chinese indicine cattle, we first used two banteng genomes to identify banteng-specific alleles. Then, 5-kb sliding windows were used to calculate the mean frequency of banteng and indicine alleles in the Chinese indicine cattle and the frequency of two types of alleles were plotted (Supplementary Fig. 15). To identify introgressed intervals in Chinese indicine genomes, we applied a robust forward-backward algorithm for all autosomes of Chinese indicine genomes using the software RFMix<sup>33</sup>. Five other genetic groups were selected as reference panels, including European taurine, Eurasian taurine, and Eastern Asian taurine, Indian indicine as well as banteng. The proportion of the genome inferred to be of *Bos javanicus* ancestry ranged between 2.38% and 3.84% (mean  $\pm$  standard error (SE) = 2.92  $\pm$  0.11%) per animal

(Supplementary Table 20). Phylogenetic analysis based on the SNPs in 13 introgression intervals in 15 or more Chinese indicine haploids revealed a close genetic relationship between the Chinese indicine cattle and *Bos javanicus* (Supplementary Fig. 16 and Supplementary Table 21).

### **Annotation of the gene content of the introgressed segments**

Gene set enrichment analyses were carried out with Gene Ontology (GO) categories and Kyoto Encyclopaedia of Genes and Genomes (KEGG) pathways for DAVID 6.7 (<http://david.abcc.ncifcrf.gov/>). To provide a first overview of the over-represented groups of genes and to test their reliability, we performed different GO and KEGG pathway enrichment analyses with DAVID using different lists of genes located in chromosomal regions detected as introgressed from banteng to Chinese indicine and from yak to Tibetan taurine cattle by RFMix analyses (results are presented in Table 1). Only pathways or annotations with Bonferroni-corrected  $P < 10^{-2}$  were retained (Supplementary Table 22). We also identified several introgressed genes that favor local adaptation to hot environments in Chinese indicine cattle (Supplementary Table 23). Phylogenetic analyses of introgressed segments with signs of banteng ancestry in Chinese indicine genomes are shown Supplementary Fig. 19.

### **Yak introgression in Tibetan taurine cattle**

To detect introgressions from yak into Tibetan taurine cattle, we used 13 individual genomes of yak to detect yak-specific alternate alleles and plotted the frequency of the yak and bovine alleles for all positions. Then, 5-kb sliding windows were used to calculate the mean frequency of yak and bovine alleles in the Tibetan taurine group (Supplementary Fig. 17).  $f_3$  statistics,  $D$  statistics and Treemix analyses also confirmed the gene flow from yak to Tibetan taurine cattle (Supplementary Fig. 14 and Supplementary Tables 24, 25). To identify introgressed intervals in Tibetan taurine genomes, we applied a robust forward-backward algorithm for all autosomes of Tibetan genomes using the software RFMix<sup>33</sup>. Five other genetic groups were selected as reference panels, including European taurine, Eastern Asian taurine, Indian indicine, and Chinese indicine as well as yak. The genome proportion inferred to be of yak ancestry ranged between 0.05% and 2.94% (mean  $\pm$  standard error (SE) =  $1.22 \pm 0.18$  %) per animal (Supplementary Table 26). Phylogenetic analysis based on the SNPs in 30 introgression intervals in eight or more Tibetan taurine haploids revealed a close genetic relationship between the Tibetan taurine cattle and yak (Supplementary Fig. 18 and Supplementary Table 27). In addition, we were able to retrieve hypoxia genes in introgressed regions that might help Tibetan taurine cattle adapt to hypoxic environments (Supplementary Fig. 20 and Supplementary Table 28).

### **Effect of sample size on introgression analysis**

We also explored how sample size can impact the results of introgression analysis, especially for a species with only two individuals. Thirteen samples of yak in our study could be used to simulate the

effects of sample size on the results of introgression from yak into Tibetan taurine cattle. Although we cannot directly evaluate whether two banteng were sufficient, we can estimate the effects of sample sizes on the detection of yak introgression into taurine cattle since we have 13 yak available. In our study, a total of 4,238 introgressed segments (~246 Mb) were detected using the 13 yak reference. If two randomly selected yak individuals were used for introgression analysis (totally 78 combinations from 13 samples), the detection ratio of introgressed segments is >99% for highly frequent segments (ie.,  $\geq$  two alleles in nine Tibetan taurine cattle) and can still reaches 75% for low frequent ones (one allele in nine Tibetan taurine cattle). In our study, the mean proportion of the genome inferred to be of *Bos javanicus* ancestry was  $2.92 \pm 0.11$  %, with  $2.61 \pm 0.10$  % showing at least two alleles. So we believe that our two banteng samples should be sufficient for the detection of introgressed segments, especially for the highly confident regions with at least two shared alleles in indicine cattle. In addition, only introgressed segments that shared at least two alleles in Chinese indicine cattle were used for the functional enrichment and introgression time analysis. We also calculated the proportion of missing genotypes in specific SNPs in different *Bos genus* species. The result showed that the missing genotypes have lower proportion in specific SNPs of different *Bos* species. So imputing the lower coverage samples have little effect on RFMix analysis (Supplementary Table 29).

### Timing of introgression

To date the banteng introgression, we selected a total of 13 non-coding regions introgressed in 15 or more Chinese indicine haploids (Supplementary Fig. 16). The divergence time of Chinese indicine cattle and banteng on these regions was used to represent the time of introgression. The software *bpp3.3a* was used to estimate the divergence time under the multispecies coalescent model on a fixed species phylogeny with the following Gamma priors:  $\theta \sim G(2, 700)$ ,  $\tau \sim G(20, 4,000,000)$ <sup>34</sup>. The number of samples used in the MCMC algorithms was 100,000, and the sampling frequency was 10. The estimated mean divergence time ( $\theta$ ) was 0.000005, and 95% highest probability density (HPD) intervals were from 0.000003 to 0.000007, which were scaled to an absolute time of 2,381 years (1,428 years to 3,333 years, 95% HPD), with a mutation rate of  $\mu_g = 1.26 \times 10^{-8}$  per generation<sup>35</sup> and a generation of six years<sup>10</sup>.

To date the yak introgressions, we selected 30 non-coding regions introgressed into eight or more Tibetan taurine haploids (Supplementary Fig. 18). The divergence time of Tibetan taurine cattle and yak on these regions was used to represent the time of introgression. The software *bpp3.3a* was used to estimate the divergence time under the multispecies coalescent model on a fixed species phylogeny with the following Gamma priors:  $\theta \sim G(2, 700)$ ,  $\tau \sim G(20, 6,800,000)$ <sup>34</sup>. The number of samples used in MCMC algorithms was 100,000, and the sampling frequency was 10. The estimated mean divergence time ( $\theta$ ) was 0.000005, and the 95% HPD intervals were from 0.000003 to 0.000007, which were scaled to an absolute time of 1,904 years (1,428 years to 2,380 years, 95% HPD), with a mutation rate of  $\mu_g = 1.26 \times 10^{-8}$  per generation<sup>35</sup> and a generation interval of six years<sup>10</sup>.

## Supplementary Note 6

### Estimates of the effective population size and divergence time

The multiple sequential coalescent Markovian model (MSMC) method was used to model the history of the five genetic groups and infer historical changes in the effective population size and population separation. We applied this method to all groups with two deep-coverage (>15 X) individuals per group. For each individual, we identified SNPs in the autosomes using GATK, and sites with extremely low or extremely high coverage were excluded. All sites were phased using BEAGLE (version 4.1)<sup>19</sup>. For effective population size inference, two individuals (4 phased haplotypes) from each population were used. The time scale is in generation time at  $g = 6$ , and a mutation rate per generation  $\mu_g = 1.26 \times 10^{-8}$  was used<sup>10,35</sup>.

Samples (coverage) used in this analysis are:

- East Asian taurine: Tibetan03 (27.06) , Tibetan04 (25.36)
- European taurine: Hereford06 (16.12), Hereford07 (17.34)
- European taurine: Gelbvieh03 (15.72), Gelbvieh04 (25.26)
- Chinese indicine: Wannan01 (23.96), Wannan02 (24.32)
- Indian indicine: Haryana (36.85), Sahiwal (21.99)

We define the estimated divergence time between a pair of populations as the first time point at which the cross-coalescence rate is at or above 0.5. For the range of divergence times, we used the first time point at which the cross-coalescence rate was at or above 0.25 and 0.75. We also assessed the impact of introgression on the estimates of effective population size ( $N_e$ ) and divergence time in MSMC. We repeated the MSMC analysis using the same data but excluding the genomic regions representing banteng introgression into two Chinese indicine cattle (~3.5%) and yak introgression in two Tibetan taurine cattle (~1.3%), respectively (Supplementary Tables 20 and 26). The results showed that the limited introgression did not change the estimates of divergence time and  $N_e$  too much (Supplementary Fig. 21).

We also used diffusion approximations for demographic inference ( $\partial a \partial i$ )<sup>36</sup> to infer the divergence time between Chinese indicine and Indian indicine cattle. We simulated four models with the same dataset under the two-population model in  $\partial a \partial i$  independently. Of the SNPs identified in 17 Chinese indicine and 20 Indian indicine individuals, we only considered those from intergenic regions in autosomal sequences to ensure their neutrality. Because the introgression happened in Chinese indicine cattle may disturb the analysis, here we used only non-introgressed regions to produce allele frequency spectra (AFS) data. The introgressed regions detected by RFMix were excluded firstly. Then we calculate number of SNPs that shared with *Bos javanicus* in every 10 k interval on whole-genome, and intervals contain no *Bos javanicus*-specific SNPs were remained. Only 56 M intergenic regions were used to produce AFS data using ANGSD software. The simulation of  $\partial a \partial i$  showed that the Chinese indicine and Indian indicine populations diverged ~40,149 years ago

(~32,299 to 52,677 years ago, 95% CI; Fig. 6c, Supplementary Fig. 22 and Supplementary Table 30), which gave rise to today's pattern of two genetically distinct indicine populations.

### Supplementary References

1. Heaton, M.P. *et al.* Using diverse U.S. beef cattle genomes to identify missense mutations in EPAS1, a gene associated with pulmonary hypertension. *F1000Research* **5**, 2003 (2016).
2. Shin, D.-H. *et al.* Deleted copy number variation of Hanwoo and Holstein using next generation sequencing at the population level. *BMC Genomics* **15**, 240 (2014).
3. Bickhart, D.M. *et al.* Diversity and population-genetic properties of copy number variations and multicopy genes in cattle. *DNA Res.* **23**, 253-262 (2016).
4. Tsuda, K. *et al.* Abundant sequence divergence in the native Japanese cattle Mishima-Ushi (*Bos taurus*) detected using whole-genome sequencing. *Genomics* **102**, 372-378 (2013).
5. Kawahara-Miki, R. *et al.* Whole-genome resequencing shows numerous genes with nonsynonymous SNPs in the Japanese native cattle Kuchinoshima-Ushi. *BMC Genomics* **12**, 103 (2011).
6. Stothard, P. *et al.* A large and diverse collection of bovine genome sequences from the Canadian Cattle Genome Project. *GigaScience* **4**, 49 (2015).
7. Wang, K. *et al.* The genome sequence of the wisent (*Bison bonasus*). *GigaScience* **6**, 1-5 (2017).
8. Qiu, Q. *et al.* Yak whole-genome resequencing reveals domestication signatures and prehistoric population expansions. *Nat. Commun.* **6**, 10283 (2015).
9. Mei, C. *et al.* Whole-genome sequencing of the endangered bovine species Gayal (*Bos frontalis*) provides new insights into its genetic features. *Sci. Rep.* **6**, 19787 (2016).
10. Gautier, M. *et al.* Deciphering the Wisent demographic and adaptive histories from individual whole-genome sequences. *Mol. Biol. Evol.* **33**, 2801-2814 (2016).
11. Li, H. & Durbin, R. Fast and accurate short read alignment with Burrows–Wheeler transform. *Bioinformatics* **25**, 1754-1760 (2009).
12. McKenna, A. *et al.* The Genome Analysis Toolkit: A MapReduce framework for analyzing next-generation DNA sequencing data. *Genome Res.* **20**, 1297-1303 (2010).
13. Danecek, P. *et al.* The variant call format and VCFtools. *Bioinformatics* **27**, 2156-2158 (2011).
14. Purcell, S. *et al.* PLINK: A tool set for whole-genome association and population-based linkage analyses. *Am. J. Hum. Genet.* **81**, 559-575 (2007).
15. Patterson, N., Price, A.L. & Reich, D. Population Structure and Eigenanalysis. *PLoS Genet.* **2**, e190 (2006).
16. Wickham, H. ggplot2. *Wiley Interdisciplinary Reviews: Computational Statistics* **3**, 180-185 (2011).
17. Alexander, D.H., Novembre, J. & Lange, K. Fast model-based estimation of ancestry in

- unrelated individuals. *Genome Res.* **19**, 1655-1664 (2009).
18. Chang, T.-C., Yang, Y., Retzel, E.F. & Liu, W.-S. Male-specific region of the bovine Y chromosome is gene rich with a high transcriptomic activity in testis development. *Proc. Natl. Acad. Sci. USA* **110**, 12373-12378 (2013).
  19. Browning, S.R. & Browning, B.L. Rapid and accurate haplotype phasing and missing-data inference for whole-genome association studies by use of localized haplotype clustering. *Am. J. Hum. Genet.* **81**, 1084-1097 (2007).
  20. Drummond, A.J., Suchard, M.A., Xie, D. & Rambaut, A. Bayesian Phylogenetics with BEAUti and the BEAST 1.7. *Mol. Biol. Evol.* **29**, 1969-1973 (2012).
  21. Edwards, C.J. *et al.* A complete mitochondrial genome sequence from a mesolithic wild aurochs (*Bos primigenius*). *PLoS One* **5**, e9255 (2010).
  22. Achilli, A. *et al.* The multifaceted origin of taurine cattle reflected by the mitochondrial genome. *PLoS One* **4**, e5753 (2009).
  23. Achilli, A. *et al.* Mitochondrial genomes of extinct aurochs survive in domestic cattle. *Curr. Biol.* **18**, R157-R158 (2008).
  24. Hiendleder, S., Lewalski, H. & Janke, A. Complete mitochondrial genomes of *Bos taurus* and *Bos indicus* provide new insights into intra-species variation, taxonomy and domestication. *Cytogenet. Genome Res.* **120**, 150-156 (2008).
  25. Keane, T.M., Creevey, C.J., Pentony, M.M., Naughton, T.J. & McLnerney, J.O. Assessment of methods for amino acid matrix selection and their use on empirical data shows that ad hoc assumptions for choice of matrix are not justified. *BMC Evol. Biol.* **6**, 29 (2006).
  26. Guindon, S. *et al.* New algorithms and methods to estimate maximum-likelihood phylogenies: assessing the performance of PhyML 3.0. *Syst. Biol.* **59**, 307-321 (2010).
  27. Sun, Z. *et al.* The first Neolithic urban center on China's north Loess Plateau: The rise and fall of Shimao. *Archaeological Research in Asia* (2017).
  28. Patterson, N. *et al.* Ancient admixture in human history. *Genetics* **192**, 1065 (2012).
  29. Green, R.E. *et al.* A draft sequence of the Neandertal genome. *Science* **328**, 710 (2010).
  30. Manichaikul, A. *et al.* Robust relationship inference in genome-wide association studies. *Bioinformatics* **26**, 2867-2873 (2010).
  31. Gou, X., Wang, Y., Yang, S., Deng, W. & Mao, H. Genetic diversity and origin of Gayal and cattle in Yunnan revealed by mtDNA control region and SRY gene sequence variation. *J. Anim. Breed. Genet.* **127**, 154-160 (2010).
  32. Medugorac, I. *et al.* Whole-genome analysis of introgressive hybridization and characterization of the bovine legacy of Mongolian yaks. *Nat. Genet.* **49**, 470-475 (2017).
  33. Maples, B.K., Gravel, S., Kenny, E.E. & Bustamante, C.D. RFMix: A discriminative modeling approach for rapid and robust local-ancestry inference. *Am. J. Hum. Genet.* **93**, 278-88 (2013).
  34. Yang, Z. The BPP program for species tree estimation and species delimitation. *Current*



- Zoology* **61**, 854-865 (2015).
35. Liu, Y. *et al.* *Bos taurus* genome assembly. *BMC Genomics* **10**, 180 (2009).
  37. Gutenkunst, R.N., Hernandez, R.D., Williamson, S.H. & Bustamante, C.D. Inferring the joint demographic history of multiple populations from multidimensional SNP frequency data. *PLoS Genet.* **5**, e1000695 (2009).
