# Supplementary material for: Whole-genome resequencing reveals world-wide ancestry and adaptive introgression events of domesticated cattle in East Asia
Source: PubMed Central journal article supplement (PMC6002414; doi:10.1038/s41467-018-04737-0), 2018-06-14
Supplement: 41467_2018_4737_MOESM3_ESM.pdf [file 41467_2018_4737_MOESM3_ESM.pdf]

## **Description of Additional Supplementary Files**

File Name: Supplementary Data 1

Description: Pariwise distance of 260 individuals.

File Name: Supplementary Data 2

Description: The genotype of 745 SNPs in X-degenerate region.
